# Supplementary material for: Pre-adolescent Brain Asymmetry: Developmental Trajectory, Cognitive and Psychiatric Effects, Neurobiological and Environmental Influences in ABCD Study
Source: Research Square preprint supplement (doi:10.21203/rs.3.rs-5253313/v1), 2024-10-17
Supplement: Supplementary file 1 [file aa53c349558c70df36c17a5b.xlsx]

## Sheet: SM Table 1
		Baseline	2 yrs follow up	4 yrs follow up
N		10963	7006	2744
Month of Age (mean(SD))		119.01(7.49)	143.31(7,8)	168.98(8.3)
Handedness (mean(SD))		1.28(0.59)	1.27(0.58)	1.3(0.6)
Race (%)
	White	5862(53.5)	3943(56.3)	1579(57.5)
	Hispanic	2200(20.1)	1341(19.1)	550(20)
	Black	1528(13.9)	876(12.5)	269(9.8)
	Asian	229(2.1)	127(1.8)	57(2.1)
	Other	1142(10.4)	719(10.3)	289(10.5)
Sex (%)
	F	5265(48)	3235(46.2)	1272(46.4)
	M	5695(51.9)	3770(53.8)	1471(53.6)
Pubertal (mean(SD))		1.76(0.87)	2.54(1.06)	3.63(0.81)
ITV (cm2, mean(SD))		1491.9(143.4)	1524.3(147.3)	1534.3(168.7)

## Sheet: SM Table 2
x	y	estimate	df	tval	pval
interview_age	smri_area_cdk_bankssts	-3.48029e-05	11157.3	-2.05173	0.0402189
sex	smri_area_cdk_bankssts	-0.0590765	11183.2	-1.24936	0.211558
ehi_y_ss_scoreb	smri_area_cdk_bankssts	-0.00107956	11119.6	-0.815578	0.414759
smri_vol_scs_intracranialv	smri_area_cdk_bankssts	1.11795	18220.8	2.55854	0.0105192
interview_age	smri_area_cdk_cdacate	-2.61351e-05	11308.5	-0.95708	0.338547
sex	smri_area_cdk_cdacate	-0.0850476	11170.6	-1.17179	0.241307
ehi_y_ss_scoreb	smri_area_cdk_cdacate	-0.00334788	11117.7	-1.64806	0.0993683
smri_vol_scs_intracranialv	smri_area_cdk_cdacate	-2.2786	17726.1	-3.32112	0.000898383
interview_age	smri_area_cdk_cdmdfr	4.6719e-05	11884.8	2.44189	0.014625
sex	smri_area_cdk_cdmdfr	-0.00976545	11221.3	-0.220552	0.825445
ehi_y_ss_scoreb	smri_area_cdk_cdmdfr	0.00287054	11136.3	2.31764	0.0204868
smri_vol_scs_intracranialv	smri_area_cdk_cdmdfr	-0.243529	20499.5	-0.544011	0.58644
interview_age	smri_area_cdk_cuneus	3.02028e-05	11777.8	2.55622	0.010594
sex	smri_area_cdk_cuneus	-0.0211882	11197.5	-0.765549	0.443961
ehi_y_ss_scoreb	smri_area_cdk_cuneus	0.000193635	11115.5	0.250065	0.802541
smri_vol_scs_intracranialv	smri_area_cdk_cuneus	-1.49661	17956.9	-5.36343	8.26668e-08
interview_age	smri_area_cdk_ehinal	0.000132219	14990.6	3.76972	0.000164055
sex	smri_area_cdk_ehinal	0.0199523	11370.9	0.382392	0.702178
ehi_y_ss_scoreb	smri_area_cdk_ehinal	-8.7416e-05	11083.7	-0.0601621	0.952028
smri_vol_scs_intracranialv	smri_area_cdk_ehinal	-0.965893	14656.9	-1.56044	0.118677
interview_age	smri_area_cdk_fusiform	1.07767e-05	11084.3	1.23562	0.216626
sex	smri_area_cdk_fusiform	-0.0591686	11184.3	-2.36939	0.0178342
ehi_y_ss_scoreb	smri_area_cdk_fusiform	-0.0011093	11131.3	-1.58673	0.112601
smri_vol_scs_intracranialv	smri_area_cdk_fusiform	-0.654426	18740.3	-2.87937	0.00398921
interview_age	smri_area_cdk_ifpl	4.3791e-05	10834.9	4.11115	3.96603e-05
sex	smri_area_cdk_ifpl	-0.0372188	11161.2	-1.10715	0.268252
ehi_y_ss_scoreb	smri_area_cdk_ifpl	0.00078276	11124.4	0.831551	0.40568
smri_vol_scs_intracranialv	smri_area_cdk_ifpl	-0.79993	17193.2	-2.77268	0.00556574
interview_age	smri_area_cdk_iftm	1.03886e-05	11074.3	1.04706	0.295095
sex	smri_area_cdk_iftm	-0.0253041	11187.4	-0.885398	0.375961
ehi_y_ss_scoreb	smri_area_cdk_iftm	-0.000465993	11136.1	-0.582409	0.560303
smri_vol_scs_intracranialv	smri_area_cdk_iftm	0.278703	18691.9	1.07549	0.282171
interview_age	smri_area_cdk_ihcate	-3.26772e-05	12542.6	-1.84302	0.0653504
sex	smri_area_cdk_ihcate	0.0225311	11246.8	0.624804	0.532112
ehi_y_ss_scoreb	smri_area_cdk_ihcate	-0.00327276	11129.9	-3.24662	0.0011713
smri_vol_scs_intracranialv	smri_area_cdk_ihcate	2.52175	19578.4	6.54639	6.04068e-11
interview_age	smri_area_cdk_locc	1.38531e-05	10602.9	1.88949	0.0588539
sex	smri_area_cdk_locc	0.0206951	11164.7	0.796574	0.425715
ehi_y_ss_scoreb	smri_area_cdk_locc	0.00029296	11133.1	0.402668	0.6872
smri_vol_scs_intracranialv	smri_area_cdk_locc	-0.975886	18395.9	-4.73431	2.21439e-06
interview_age	smri_area_cdk_lobfr	-2.59975e-05	15928.9	-1.76366	0.0778087
sex	smri_area_cdk_lobfr	-0.00684632	11183.5	-0.340692	0.733342
ehi_y_ss_scoreb	smri_area_cdk_lobfr	-0.00026501	10746	-0.478851	0.632054
smri_vol_scs_intracranialv	smri_area_cdk_lobfr	2.74544	14271.9	11.2137	4.62246e-29
interview_age	smri_area_cdk_lingual	-1.30042e-05	10985.2	-1.51334	0.130222
sex	smri_area_cdk_lingual	-0.045153	11158.2	-1.81205	0.0700052
ehi_y_ss_scoreb	smri_area_cdk_lingual	-0.00162011	11121.3	-2.32564	0.0200559
smri_vol_scs_intracranialv	smri_area_cdk_lingual	-0.87266	19809.1	-3.8541	0.000116524
interview_age	smri_area_cdk_mobfr	2.36547e-05	15742.1	1.31565	0.18831
sex	smri_area_cdk_mobfr	-0.0144534	11442.9	-0.577001	0.56395
ehi_y_ss_scoreb	smri_area_cdk_mobfr	-0.00139199	11084	-1.99787	0.045755
smri_vol_scs_intracranialv	smri_area_cdk_mobfr	0.520326	13926	1.72647	0.084286
interview_age	smri_area_cdk_mdtm	2.75607e-05	11744.5	2.88227	0.00395536
sex	smri_area_cdk_mdtm	0.0149024	11197.6	0.660419	0.508999
ehi_y_ss_scoreb	smri_area_cdk_mdtm	0.000715708	11111.9	1.13365	0.256965
smri_vol_scs_intracranialv	smri_area_cdk_mdtm	-0.0124254	18204.4	-0.0547645	0.956327
interview_age	smri_area_cdk_parahpal	-9.99136e-06	14349.4	-0.485014	0.627674
sex	smri_area_cdk_parahpal	-0.0194431	11374.9	-0.594665	0.55208
ehi_y_ss_scoreb	smri_area_cdk_parahpal	0.00166258	11118.6	1.82406	0.0681695
smri_vol_scs_intracranialv	smri_area_cdk_parahpal	-0.0851066	15381.2	-0.223104	0.823458
interview_age	smri_area_cdk_paracn	1.26682e-05	11615.1	0.931581	0.351573
sex	smri_area_cdk_paracn	-0.0284982	11195.6	-0.852146	0.394152
ehi_y_ss_scoreb	smri_area_cdk_paracn	-0.00046448	11122.2	-0.49639	0.619629
smri_vol_scs_intracranialv	smri_area_cdk_paracn	-0.83251	20683.4	-2.53442	0.0112707
interview_age	smri_area_cdk_parsopc	1.49799e-05	11517.7	0.855237	0.392438
sex	smri_area_cdk_parsopc	-0.0456157	11196	-1.03114	0.302496
ehi_y_ss_scoreb	smri_area_cdk_parsopc	-0.000116475	11127.1	-0.0940929	0.925037
smri_vol_scs_intracranialv	smri_area_cdk_parsopc	0.158555	20706.6	0.369778	0.711552
interview_age	smri_area_cdk_parsobis	-2.97839e-05	12122.9	-2.19368	0.028277
sex	smri_area_cdk_parsobis	0.0280482	11217.8	0.941856	0.346287
ehi_y_ss_scoreb	smri_area_cdk_parsobis	0.000589538	11119.9	0.707888	0.47903
smri_vol_scs_intracranialv	smri_area_cdk_parsobis	1.16999	20194	3.79415	0.00014858
interview_age	smri_area_cdk_parstgris	-3.404e-06	11611.9	-0.202507	0.839524
sex	smri_area_cdk_parstgris	0.0306792	11209.7	0.738732	0.460085
ehi_y_ss_scoreb	smri_area_cdk_parstgris	-0.000410811	11137.2	-0.353539	0.723691
smri_vol_scs_intracranialv	smri_area_cdk_parstgris	0.655372	20690	1.6103	0.107347
interview_age	smri_area_cdk_pericc	-2.77499e-05	12275.4	-2.20994	0.0271276
sex	smri_area_cdk_pericc	-0.0419559	11232.8	-1.58558	0.112862
ehi_y_ss_scoreb	smri_area_cdk_pericc	-0.00083352	11106.5	-1.12691	0.259806
smri_vol_scs_intracranialv	smri_area_cdk_pericc	-1.39052	18113.3	-4.95915	7.14426e-07
interview_age	smri_area_cdk_postcn	2.20732e-05	12728.5	1.64947	0.0990756
sex	smri_area_cdk_postcn	0.0450905	11228.4	1.71671	0.0860598
ehi_y_ss_scoreb	smri_area_cdk_postcn	-0.000734505	11097.3	-1.0006	0.31704
smri_vol_scs_intracranialv	smri_area_cdk_postcn	-0.00290584	19219.1	-0.0102163	0.991849
interview_age	smri_area_cdk_ptcate	3.00167e-05	10593.1	2.55293	0.0106961
sex	smri_area_cdk_ptcate	-5.76793e-05	11162.7	-0.00137727	0.998901
ehi_y_ss_scoreb	smri_area_cdk_ptcate	-0.0028505	11137.9	-2.43024	0.0151044
smri_vol_scs_intracranialv	smri_area_cdk_ptcate	-0.167506	16497.6	-0.503903	0.614336
interview_age	smri_area_cdk_precn	2.99097e-05	12941.5	2.47283	0.0134176
sex	smri_area_cdk_precn	0.0100856	11210.8	0.439939	0.659989
ehi_y_ss_scoreb	smri_area_cdk_precn	0.000831884	11079.3	1.29873	0.194063
smri_vol_scs_intracranialv	smri_area_cdk_precn	-0.00185919	18839.2	-0.00739393	0.994101
interview_age	smri_area_cdk_pc	2.75673e-07	12184.1	0.0269684	0.978485
sex	smri_area_cdk_pc	0.0332009	11211.3	1.51235	0.130472
ehi_y_ss_scoreb	smri_area_cdk_pc	0.000611886	11119.2	0.996712	0.318926
smri_vol_scs_intracranialv	smri_area_cdk_pc	-0.673044	16896.5	-2.93202	0.0033722
interview_age	smri_area_cdk_rracate	5.73111e-05	12021	2.45614	0.0140578
sex	smri_area_cdk_rracate	0.0166551	11233.6	0.319339	0.749476
ehi_y_ss_scoreb	smri_area_cdk_rracate	-0.00314065	11139.6	-2.15281	0.0313552
smri_vol_scs_intracranialv	smri_area_cdk_rracate	1.81166	18196.1	3.37143	0.000749335
interview_age	smri_area_cdk_rrmdfr	-5.00525e-06	12702.8	-0.38673	0.698962
sex	smri_area_cdk_rrmdfr	-0.00264376	11220	-0.103762	0.91736
ehi_y_ss_scoreb	smri_area_cdk_rrmdfr	-9.70993e-05	11090.1	-0.136357	0.891541
smri_vol_scs_intracranialv	smri_area_cdk_rrmdfr	0.422885	19248	1.53439	0.12495
interview_age	smri_area_cdk_sufr	2.39697e-05	12642.1	2.13664	0.0326463
sex	smri_area_cdk_sufr	0.00417031	11243.2	0.18619	0.852299
ehi_y_ss_scoreb	smri_area_cdk_sufr	-0.000664347	11118	-1.06118	0.288632
smri_vol_scs_intracranialv	smri_area_cdk_sufr	-0.52183	19397.2	-2.16538	0.0303704
interview_age	smri_area_cdk_supl	-6.27561e-06	12940.8	-0.419839	0.67461
sex	smri_area_cdk_supl	0.0167691	11129.2	0.614907	0.538629
ehi_y_ss_scoreb	smri_area_cdk_supl	0.00038989	11018.8	0.511832	0.608779
smri_vol_scs_intracranialv	smri_area_cdk_supl	-0.15121	15070.3	-0.498681	0.618011
interview_age	smri_area_cdk_sutm	6.11433e-06	11331.3	0.724505	0.468771
sex	smri_area_cdk_sutm	-0.0286086	11210.2	-1.28427	0.199075
ehi_y_ss_scoreb	smri_area_cdk_sutm	0.000294388	11128.6	0.472243	0.636763
smri_vol_scs_intracranialv	smri_area_cdk_sutm	0.480273	19154.2	2.26144	0.0237435
interview_age	smri_area_cdk_sm	-4.96079e-05	11998.5	-2.72602	0.00641968
sex	smri_area_cdk_sm	0.0125576	11227.2	0.305652	0.759876
ehi_y_ss_scoreb	smri_area_cdk_sm	3.06895e-05	11136.3	0.0267068	0.978694
smri_vol_scs_intracranialv	smri_area_cdk_sm	0.508805	20374.7	1.21125	0.225814
interview_age	smri_area_cdk_frpole	-5.3764e-05	15477	-2.25067	0.0244206
sex	smri_area_cdk_frpole	-0.0351945	11374.3	-1.03663	0.299929
ehi_y_ss_scoreb	smri_area_cdk_frpole	-0.00149059	11016.2	-1.57712	0.114797
smri_vol_scs_intracranialv	smri_area_cdk_frpole	1.44843	13790.3	3.5777	0.00034782
interview_age	smri_area_cdk_tmpole	-7.88388e-06	15598.8	-0.33743	0.735798
sex	smri_area_cdk_tmpole	-0.0139824	11441	-0.425562	0.670435
ehi_y_ss_scoreb	smri_area_cdk_tmpole	-0.000279423	11072.3	-0.305629	0.759893
smri_vol_scs_intracranialv	smri_area_cdk_tmpole	-2.47767	13984.4	-6.28511	3.37332e-10
interview_age	smri_area_cdk_trvtm	1.77774e-05	12064.1	1.11643	0.26426
sex	smri_area_cdk_trvtm	-0.0241019	11239.8	-0.685933	0.49277
ehi_y_ss_scoreb	smri_area_cdk_trvtm	-0.000363249	11135.8	-0.369612	0.711679
smri_vol_scs_intracranialv	smri_area_cdk_trvtm	0.592173	17735.8	1.62622	0.10392
interview_age	smri_area_cdk_insula	3.45887e-06	19322.1	0.183471	0.854431
sex	smri_area_cdk_insula	-0.0118767	12110.1	-0.595671	0.551406
ehi_y_ss_scoreb	smri_area_cdk_insula	-0.000956937	10879.2	-1.74889	0.0803389
smri_vol_scs_intracranialv	smri_area_cdk_insula	0.645606	11457	2.59775	0.00939568
interview_age	smri_thick_cdk_bankssts	-2.74721e-05	12165.5	-3.40223	0.000670548
sex	smri_thick_cdk_bankssts	0.0262752	11207.8	1.50621	0.132041
ehi_y_ss_scoreb	smri_thick_cdk_bankssts	-0.00057996	11106.4	-1.18875	0.234562
smri_vol_scs_intracranialv	smri_thick_cdk_bankssts	-0.493211	18076.9	-2.70618	0.00681267
interview_age	smri_thick_cdk_cdacate	1.08003e-05	12753.1	0.959896	0.337126
sex	smri_thick_cdk_cdacate	-0.016261	11196.6	-0.750693	0.452853
ehi_y_ss_scoreb	smri_thick_cdk_cdacate	0.00077087	11035.4	1.27586	0.202033
smri_vol_scs_intracranialv	smri_thick_cdk_cdacate	1.54582	17739.4	6.48239	9.26613e-11
interview_age	smri_thick_cdk_cdmdfr	2.12493e-05	15286.4	2.8681	0.00413516
sex	smri_thick_cdk_cdmdfr	-0.00242978	11218	-0.228946	0.818915
ehi_y_ss_scoreb	smri_thick_cdk_cdmdfr	-0.000341375	10909.4	-1.15753	0.247081
smri_vol_scs_intracranialv	smri_thick_cdk_cdmdfr	-0.176036	14280	-1.38227	0.166911
interview_age	smri_thick_cdk_cuneus	1.26215e-05	12690.7	1.6748	0.0939976
sex	smri_thick_cdk_cuneus	-0.0157314	11157.5	-1.07346	0.28309
ehi_y_ss_scoreb	smri_thick_cdk_cuneus	0.000286422	11066.5	0.700401	0.483692
smri_vol_scs_intracranialv	smri_thick_cdk_cuneus	-1.31274	17993.5	-8.17085	3.26325e-16
interview_age	smri_thick_cdk_ehinal	-1.03334e-05	16878.1	-0.588708	0.556065
sex	smri_thick_cdk_ehinal	-0.0137019	11399.1	-0.620831	0.534723
ehi_y_ss_scoreb	smri_thick_cdk_ehinal	0.000239119	10837.9	0.390617	0.696088
smri_vol_scs_intracranialv	smri_thick_cdk_ehinal	-0.900199	12762.2	-3.33009	0.000870647
interview_age	smri_thick_cdk_fusiform	3.9105e-07	13932.3	0.0713979	0.943082
sex	smri_thick_cdk_fusiform	0.00839941	11102.2	0.933309	0.350681
ehi_y_ss_scoreb	smri_thick_cdk_fusiform	-0.000144347	10927.3	-0.578766	0.562759
smri_vol_scs_intracranialv	smri_thick_cdk_fusiform	-1.76826	16297.5	-16.8915	1.8016e-63
interview_age	smri_thick_cdk_ifpl	-3.43699e-05	15147.4	-5.88332	4.10601e-09
sex	smri_thick_cdk_ifpl	0.000623665	11246.1	0.0735689	0.941355
ehi_y_ss_scoreb	smri_thick_cdk_ifpl	-0.000160039	10935.3	-0.678106	0.497719
smri_vol_scs_intracranialv	smri_thick_cdk_ifpl	-0.310901	14065.2	-3.07583	0.0021032
interview_age	smri_thick_cdk_iftm	1.78819e-06	14212.4	0.281524	0.778313
sex	smri_thick_cdk_iftm	0.00237558	11233.6	0.233357	0.815489
ehi_y_ss_scoreb	smri_thick_cdk_iftm	0.000674066	11035.1	2.37471	0.0175799
smri_vol_scs_intracranialv	smri_thick_cdk_iftm	-0.952143	15401.2	-8.03987	9.64274e-16
interview_age	smri_thick_cdk_ihcate	-1.20783e-05	13251.6	-1.38911	0.164823
sex	smri_thick_cdk_ihcate	0.00647538	11266.5	0.413365	0.679347
ehi_y_ss_scoreb	smri_thick_cdk_ihcate	0.000145659	11084.3	0.333213	0.73898
smri_vol_scs_intracranialv	smri_thick_cdk_ihcate	0.72892	16984.2	4.13773	3.52453e-05
interview_age	smri_thick_cdk_locc	-9.83137e-06	13093.6	-1.91631	0.0553478
sex	smri_thick_cdk_locc	0.00550108	11225	0.5843	0.55903
ehi_y_ss_scoreb	smri_thick_cdk_locc	0.000257098	11060.6	0.97811	0.328041
smri_vol_scs_intracranialv	smri_thick_cdk_locc	-0.312894	16906.4	-2.9761	0.00292355
interview_age	smri_thick_cdk_lobfr	-3.89658e-05	17298.3	-4.82946	1.38077e-06
sex	smri_thick_cdk_lobfr	0.00744281	11409.4	0.756615	0.449296
ehi_y_ss_scoreb	smri_thick_cdk_lobfr	0.000474233	10770.7	1.74216	0.0815093
smri_vol_scs_intracranialv	smri_thick_cdk_lobfr	1.13774	12666.3	9.36871	8.57178e-21
interview_age	smri_thick_cdk_lingual	3.07163e-05	13086.3	4.91822	8.83936e-07
sex	smri_thick_cdk_lingual	-0.000751534	11197.1	-0.0654537	0.947814
ehi_y_ss_scoreb	smri_thick_cdk_lingual	-0.000640829	11050.7	-1.99811	0.0457288
smri_vol_scs_intracranialv	smri_thick_cdk_lingual	-0.731139	16896.9	-5.71688	1.10331e-08
interview_age	smri_thick_cdk_mobfr	5.69334e-05	16419	5.93434	3.00958e-09
sex	smri_thick_cdk_mobfr	-0.014695	11414.8	-1.16856	0.242607
ehi_y_ss_scoreb	smri_thick_cdk_mobfr	0.00106546	10955.7	3.05029	0.00229167
smri_vol_scs_intracranialv	smri_thick_cdk_mobfr	-0.609063	13100.6	-3.98264	6.8521e-05
interview_age	smri_thick_cdk_mdtm	1.32776e-06	14857	0.188812	0.850243
sex	smri_thick_cdk_mdtm	0.0225687	11304.8	2.13257	0.0329812
ehi_y_ss_scoreb	smri_thick_cdk_mdtm	-0.000407211	11014.7	-1.38066	0.167412
smri_vol_scs_intracranialv	smri_thick_cdk_mdtm	-0.188154	14485.2	-1.50921	0.131267
interview_age	smri_thick_cdk_parahpal	-1.67533e-06	13058.9	-0.164388	0.869428
sex	smri_thick_cdk_parahpal	0.0395339	11260	2.09199	0.0364618
ehi_y_ss_scoreb	smri_thick_cdk_parahpal	-0.000482053	11099.5	-0.914245	0.360608
smri_vol_scs_intracranialv	smri_thick_cdk_parahpal	-1.99946	17271.4	-9.49289	2.53286e-21
interview_age	smri_thick_cdk_paracn	-2.68349e-05	13690.7	-4.09665	4.21585e-05
sex	smri_thick_cdk_paracn	0.00378615	11239.4	0.339274	0.73441
ehi_y_ss_scoreb	smri_thick_cdk_paracn	-0.000180069	11045.9	-0.578003	0.563274
smri_vol_scs_intracranialv	smri_thick_cdk_paracn	0.825209	15832.3	6.49064	8.80159e-11
interview_age	smri_thick_cdk_parsopc	4.66602e-06	14406.8	0.629705	0.528897
sex	smri_thick_cdk_parsopc	0.00174162	11320.7	0.14948	0.881178
ehi_y_ss_scoreb	smri_thick_cdk_parsopc	-7.97155e-05	11068.8	-0.245328	0.806207
smri_vol_scs_intracranialv	smri_thick_cdk_parsopc	0.380847	14975.5	2.80437	0.00504795
interview_age	smri_thick_cdk_parsobis	9.69814e-06	13974.2	1.01588	0.309704
sex	smri_thick_cdk_parsobis	-0.00271748	11233.2	-0.173187	0.862507
ehi_y_ss_scoreb	smri_thick_cdk_parsobis	9.68913e-05	11041.5	0.221312	0.824854
smri_vol_scs_intracranialv	smri_thick_cdk_parsobis	0.405813	14918.9	2.2524	0.0243117
interview_age	smri_thick_cdk_parstgris	1.81171e-05	15510.9	2.14523	0.0319499
sex	smri_thick_cdk_parstgris	0.0153501	11368.5	1.28469	0.198928
ehi_y_ss_scoreb	smri_thick_cdk_parstgris	0.000125854	11022.8	0.378448	0.705105
smri_vol_scs_intracranialv	smri_thick_cdk_parstgris	-0.0435586	13798.1	-0.304395	0.760832
interview_age	smri_thick_cdk_pericc	-1.34078e-05	13880.9	-1.27465	0.202454
sex	smri_thick_cdk_pericc	-0.0177259	11267.4	-1.01213	0.311497
ehi_y_ss_scoreb	smri_thick_cdk_pericc	0.000161815	11069.2	0.331188	0.740509
smri_vol_scs_intracranialv	smri_thick_cdk_pericc	0.167906	15766.4	0.833209	0.40474
interview_age	smri_thick_cdk_postcn	3.83562e-06	15289	0.475076	0.63474
sex	smri_thick_cdk_postcn	0.0151698	11253.5	1.3188	0.187263
ehi_y_ss_scoreb	smri_thick_cdk_postcn	-0.000590633	10894.8	-1.8445	0.065138
smri_vol_scs_intracranialv	smri_thick_cdk_postcn	0.111465	13836.2	0.810751	0.417523
interview_age	smri_thick_cdk_ptcate	-2.07074e-05	13024.1	-2.84276	0.00447945
sex	smri_thick_cdk_ptcate	-0.00055042	11246	-0.0406854	0.967547
ehi_y_ss_scoreb	smri_thick_cdk_ptcate	0.000521817	11074.1	1.38225	0.166921
smri_vol_scs_intracranialv	smri_thick_cdk_ptcate	1.43182	17376.9	9.50273	2.30419e-21
interview_age	smri_thick_cdk_precn	-3.31839e-07	16399.7	-0.0408377	0.967426
sex	smri_thick_cdk_precn	0.00140835	11433.3	0.13264	0.89448
ehi_y_ss_scoreb	smri_thick_cdk_precn	-0.000168625	10949	-0.571724	0.567521
smri_vol_scs_intracranialv	smri_thick_cdk_precn	0.606659	12642.2	4.71314	2.46536e-06
interview_age	smri_thick_cdk_pc	-5.34619e-06	14050.8	-1.15233	0.249206
sex	smri_thick_cdk_pc	-0.00472838	11261.4	-0.624415	0.532368
ehi_y_ss_scoreb	smri_thick_cdk_pc	-4.90886e-05	11054.2	-0.232411	0.816223
smri_vol_scs_intracranialv	smri_thick_cdk_pc	0.582105	15633.2	6.6437	3.16005e-11
interview_age	smri_thick_cdk_rracate	3.2297e-05	14865.5	2.56521	0.0103211
sex	smri_thick_cdk_rracate	-0.0182426	11251	-0.969791	0.332171
ehi_y_ss_scoreb	smri_thick_cdk_rracate	-0.000619976	10959.3	-1.18632	0.23552
smri_vol_scs_intracranialv	smri_thick_cdk_rracate	2.14437	14927.9	9.58144	1.10485e-21
interview_age	smri_thick_cdk_rrmdfr	2.39685e-05	15966	3.73044	0.000191805
sex	smri_thick_cdk_rrmdfr	0.00498099	11215.6	0.570999	0.568012
ehi_y_ss_scoreb	smri_thick_cdk_rrmdfr	-3.81171e-05	10807.7	-0.158262	0.874253
smri_vol_scs_intracranialv	smri_thick_cdk_rrmdfr	1.58786	14083.1	14.9416	4.27555e-50
interview_age	smri_thick_cdk_sufr	4.63064e-06	15270.1	1.02487	0.305441
sex	smri_thick_cdk_sufr	-0.00349853	11145	-0.537826	0.590708
ehi_y_ss_scoreb	smri_thick_cdk_sufr	5.62509e-05	10844.4	0.312934	0.754337
smri_vol_scs_intracranialv	smri_thick_cdk_sufr	1.32871	14737.3	16.9718	5.37857e-64
interview_age	smri_thick_cdk_supl	1.38896e-06	15074.4	0.280437	0.779146
sex	smri_thick_cdk_supl	0.00353051	11276.5	0.486553	0.626585
ehi_y_ss_scoreb	smri_thick_cdk_supl	-5.87243e-05	10977.9	-0.290721	0.77127
smri_vol_scs_intracranialv	smri_thick_cdk_supl	0.156424	14370.2	1.81031	0.0702684
interview_age	smri_thick_cdk_sutm	-1.03119e-05	14286.5	-1.75061	0.080035
sex	smri_thick_cdk_sutm	0.0131763	11221.9	1.41656	0.156638
ehi_y_ss_scoreb	smri_thick_cdk_sutm	3.84476e-05	10966.9	0.148486	0.881962
smri_vol_scs_intracranialv	smri_thick_cdk_sutm	0.724114	15366.6	6.64468	3.14099e-11
interview_age	smri_thick_cdk_sm	-1.72745e-05	15958.1	-2.25635	0.0240623
sex	smri_thick_cdk_sm	-0.00795472	11177.2	-0.769762	0.441457
ehi_y_ss_scoreb	smri_thick_cdk_sm	-0.000326021	10821.5	-1.13612	0.255931
smri_vol_scs_intracranialv	smri_thick_cdk_sm	-0.676423	13385.8	-5.3937	7.0193e-08
interview_age	smri_thick_cdk_frpole	-9.12991e-06	14739.4	-0.592291	0.553665
sex	smri_thick_cdk_frpole	0.00678189	11244.6	0.289057	0.772543
ehi_y_ss_scoreb	smri_thick_cdk_frpole	0.00032819	10964.4	0.501881	0.615761
smri_vol_scs_intracranialv	smri_thick_cdk_frpole	0.843606	16178.2	3.06756	0.00216174
interview_age	smri_thick_cdk_tmpole	-4.81559e-05	17137.1	-3.06283	0.00219592
sex	smri_thick_cdk_tmpole	0.0113947	11408.5	0.587328	0.556995
ehi_y_ss_scoreb	smri_thick_cdk_tmpole	-0.000359786	10805.2	-0.668962	0.503534
smri_vol_scs_intracranialv	smri_thick_cdk_tmpole	-1.47623	12459.3	-6.20423	5.67053e-10
interview_age	smri_thick_cdk_trvtm	1.13674e-05	13651.4	1.06575	0.286554
sex	smri_thick_cdk_trvtm	0.0197543	11247.9	1.08532	0.277805
ehi_y_ss_scoreb	smri_thick_cdk_trvtm	-0.00154389	11053.5	-3.0397	0.0023737
smri_vol_scs_intracranialv	smri_thick_cdk_trvtm	1.65621	16030.3	7.9654	1.75672e-15
interview_age	smri_thick_cdk_insula	4.38972e-06	17733.6	0.467231	0.64034
sex	smri_thick_cdk_insula	0.0104566	11492.5	0.937068	0.348743
ehi_y_ss_scoreb	smri_thick_cdk_insula	-0.000446635	10802.2	-1.45048	0.146955
smri_vol_scs_intracranialv	smri_thick_cdk_insula	-1.22594	12616.7	-8.84852	1.004e-18
interview_age	smri_vol_scs_cbwmatter	3.94596e-06	19048.5	1.13803	0.255122
sex	smri_vol_scs_cbwmatter	-0.00212616	11393.5	-0.559281	0.575981
ehi_y_ss_scoreb	smri_vol_scs_cbwmatter	-0.0001931	9889.99	-1.87408	0.0609483
smri_vol_scs_intracranialv	smri_vol_scs_cbwmatter	0.124793	12019.8	2.61058	0.00905017
interview_age	smri_vol_scs_ltventricle	7.11198e-05	10429.2	3.99271	6.5771e-05
sex	smri_vol_scs_ltventricle	-0.0860048	11150.8	-1.23975	0.215093
ehi_y_ss_scoreb	smri_vol_scs_ltventricle	0.00654759	11124.8	3.3695	0.000755605
smri_vol_scs_intracranialv	smri_vol_scs_ltventricle	0.63848	15883.2	1.23137	0.218204
interview_age	smri_vol_scs_inflatvent	7.4417e-05	13649.2	1.17323	0.240725
sex	smri_vol_scs_inflatvent	-0.0421911	11348.2	-0.386265	0.699308
ehi_y_ss_scoreb	smri_vol_scs_inflatvent	0.00370793	11153.9	1.21587	0.224059
smri_vol_scs_intracranialv	smri_vol_scs_inflatvent	1.33478	15701.5	1.07586	0.282008
interview_age	smri_vol_scs_crbwmatter	2.25555e-05	19590.1	1.3268	0.18459
sex	smri_vol_scs_crbwmatter	0.0383004	11923.9	2.18488	0.0289169
ehi_y_ss_scoreb	smri_vol_scs_crbwmatter	-0.000274082	10518.4	-0.571999	0.567335
smri_vol_scs_intracranialv	smri_vol_scs_crbwmatter	0.292254	11168.1	1.33121	0.183147
interview_age	smri_vol_scs_crbcortex	-3.03902e-05	14920.9	-5.6131	2.02275e-08
sex	smri_vol_scs_crbcortex	0.00426539	11058.2	0.53752	0.590919
ehi_y_ss_scoreb	smri_vol_scs_crbcortex	0.000122986	10789.9	0.556871	0.577627
smri_vol_scs_intracranialv	smri_vol_scs_crbcortex	0.482485	13940.3	5.10335	3.38091e-07
interview_age	smri_vol_scs_tp	0.000108883	17922.2	9.77263	1.67963e-22
sex	smri_vol_scs_tp	0.013477	11754.1	1.02856	0.303705
ehi_y_ss_scoreb	smri_vol_scs_tp	-0.0023869	11014	-6.58787	4.66519e-11
smri_vol_scs_intracranialv	smri_vol_scs_tp	1.14779	12488	7.08192	1.49791e-12
interview_age	smri_vol_scs_caudate	6.44239e-05	14567.2	8.38602	5.48576e-17
sex	smri_vol_scs_caudate	-0.0172971	11255.6	-1.46772	0.142208
ehi_y_ss_scoreb	smri_vol_scs_caudate	0.000350326	10978.1	1.06687	0.286056
smri_vol_scs_intracranialv	smri_vol_scs_caudate	0.231828	14795.6	1.67114	0.0947149
interview_age	smri_vol_scs_putamen	5.12649e-05	18322.6	5.13715	2.81802e-07
sex	smri_vol_scs_putamen	-0.00941271	11660.1	-0.831029	0.405974
ehi_y_ss_scoreb	smri_vol_scs_putamen	0.000120005	10773.7	0.384332	0.70074
smri_vol_scs_intracranialv	smri_vol_scs_putamen	-1.21959	12097.4	-8.64681	5.9601e-18
interview_age	smri_vol_scs_pallidum	-0.000157481	19143.3	-7.31267	2.72205e-13
sex	smri_vol_scs_pallidum	0.0160949	11719.2	0.696042	0.486416
ehi_y_ss_scoreb	smri_vol_scs_pallidum	-0.00159705	10579.2	-2.52292	0.0116529
smri_vol_scs_intracranialv	smri_vol_scs_pallidum	1.72713	11810.9	5.95294	2.70854e-09
interview_age	smri_vol_scs_hpus	-3.05074e-05	14917.5	-3.16429	0.00155776
sex	smri_vol_scs_hpus	-0.00955762	11390	-0.662167	0.507878
ehi_y_ss_scoreb	smri_vol_scs_hpus	-0.000610303	11093.4	-1.51776	0.129103
smri_vol_scs_intracranialv	smri_vol_scs_hpus	0.0560485	14610.1	0.328193	0.742771
interview_age	smri_vol_scs_amygdala	3.48395e-05	16791.3	1.90224	0.0571574
sex	smri_vol_scs_amygdala	0.0224381	11290.5	0.956529	0.338825
ehi_y_ss_scoreb	smri_vol_scs_amygdala	0.00189669	10728.2	2.94703	0.00321529
smri_vol_scs_intracranialv	smri_vol_scs_amygdala	2.20446	13778.3	7.62223	2.65579e-14
interview_age	smri_vol_scs_vedc	2.86925e-05	19213.8	3.16494	0.00155358
sex	smri_vol_scs_vedc	0.00474489	11893.4	0.494196	0.621177
ehi_y_ss_scoreb	smri_vol_scs_vedc	0.000653686	10647	2.48031	0.013142
smri_vol_scs_intracranialv	smri_vol_scs_vedc	-0.0867004	11151.6	-0.726024	0.467839
interview_age	dmdtifp1_19	0.000261612	9254.8	20.6039	2.91448e-92
sex	dmdtifp1_19	0.0273771	9762.07	1.39785	0.162188
ehi_y_ss_scoreb	dmdtifp1_19	-0.000218027	6140.27	-0.473577	0.635819
smri_vol_scs_intracranialv	dmdtifp1_19	1.94297	12380.9	8.21826	2.26935e-16
interview_age	dmdtifp1_103	-0.000344092	10870.8	-17.6843	5.1098e-69
sex	dmdtifp1_103	0.0292708	9761.63	1.13244	0.257476
ehi_y_ss_scoreb	dmdtifp1_103	-0.000986206	16030.9	-1.76645	0.0773402
smri_vol_scs_intracranialv	dmdtifp1_103	-1.33839	15979.4	-4.38997	1.14093e-05
interview_age	dmdtifp1_61	-0.000333877	10601.5	-35.2468	1.90015e-257
sex	dmdtifp1_61	0.00119627	9975.84	0.100771	0.919735
ehi_y_ss_scoreb	dmdtifp1_61	-0.000472611	6653.91	-1.62367	0.104494
smri_vol_scs_intracranialv	dmdtifp1_61	-1.82698	11846.9	-12.263	2.31106e-34
interview_age	dmdtifp1_145	-0.000326633	9209.34	-38.7459	2.24339e-304
sex	dmdtifp1_145	-0.0125727	10034.3	-1.00867	0.313155
ehi_y_ss_scoreb	dmdtifp1_145	-9.77976e-05	8051.07	-0.30329	0.761677
smri_vol_scs_intracranialv	dmdtifp1_145	-2.05167	13143.1	-13.0749	7.99654e-39
interview_age	dmdtifp1_187	70.1117	7166.16	34.183	2.23582e-237
sex	dmdtifp1_187	-8385.42	9691.37	-1.92344	0.0544543
ehi_y_ss_scoreb	dmdtifp1_187	-85.0867	9038.96	-0.713297	0.475681
smri_vol_scs_intracranialv	dmdtifp1_187	5.30116e+06	15496.1	102.252	0
interview_age	dmdtifp1_pc1	0.0229786	11543.2	38.1825	1.65683e-300
sex	dmdtifp1_pc1	0.544089	10940.8	0.704048	0.481418
ehi_y_ss_scoreb	dmdtifp1_pc1	0.0147737	8857.67	0.752371	0.451848
smri_vol_scs_intracranialv	dmdtifp1_pc1	141.139	12867.2	14.5934	7.46288e-48

## Sheet: SM Table 3
x	y	estimate	df	tval	pval
latent_factor_ss_general_ses	smri_area_cdk_bankssts	0.000962387	6705.61	0.821957	0.411131
latent_factor_ss_general_ses	smri_area_cdk_cdacate	0.000959332	6711.67	0.550347	0.5821
latent_factor_ss_general_ses	smri_area_cdk_cdmdfr	-0.00223015	7875	-2.07592	0.0379333
latent_factor_ss_general_ses	smri_area_cdk_cuneus	0.00197878	6645.52	2.95769	0.0031104
latent_factor_ss_general_ses	smri_area_cdk_ehinal	-0.000260359	6725.2	-0.196629	0.844124
latent_factor_ss_general_ses	smri_area_cdk_fusiform	9.72017e-05	6708.07	0.161875	0.871409
latent_factor_ss_general_ses	smri_area_cdk_ifpl	8.49704e-05	6785.01	0.102	0.91876
latent_factor_ss_general_ses	smri_area_cdk_iftm	-0.000606034	6676.81	-0.881304	0.378185
latent_factor_ss_general_ses	smri_area_cdk_ihcate	0.000246486	6722.52	0.277744	0.781217
latent_factor_ss_general_ses	smri_area_cdk_locc	-0.00108276	6701.22	-1.73406	0.0829527
latent_factor_ss_general_ses	smri_area_cdk_lobfr	-0.0012668	6735.03	-2.43406	0.0149563
latent_factor_ss_general_ses	smri_area_cdk_lingual	-0.000164486	6682.78	-0.27261	0.785161
latent_factor_ss_general_ses	smri_area_cdk_mobfr	-0.000741709	6682.49	-1.15437	0.248389
latent_factor_ss_general_ses	smri_area_cdk_mdtm	-0.000690406	6538.3	-1.25279	0.210325
latent_factor_ss_general_ses	smri_area_cdk_parahpal	0.000360412	6737.12	0.44452	0.656681
latent_factor_ss_general_ses	smri_area_cdk_paracn	0.00126286	6720.78	1.5215	0.128181
latent_factor_ss_general_ses	smri_area_cdk_parsopc	-0.000383883	6620.53	-0.353411	0.723792
latent_factor_ss_general_ses	smri_area_cdk_parsobis	-4.87553e-05	7875	-0.0674649	0.946213
latent_factor_ss_general_ses	smri_area_cdk_parstgris	0.000437473	6593.12	0.431	0.666483
latent_factor_ss_general_ses	smri_area_cdk_pericc	0.000736836	6692.09	1.13597	0.256011
latent_factor_ss_general_ses	smri_area_cdk_postcn	0.000794633	6670.48	1.20938	0.226561
latent_factor_ss_general_ses	smri_area_cdk_ptcate	6.7296e-05	6815.68	0.0661118	0.947291
latent_factor_ss_general_ses	smri_area_cdk_precn	3.61812e-08	6720.1	6.2928e-05	0.99995
latent_factor_ss_general_ses	smri_area_cdk_pc	0.000319264	6661.71	0.585023	0.558552
latent_factor_ss_general_ses	smri_area_cdk_rracate	0.00104704	6639.89	0.829147	0.407051
latent_factor_ss_general_ses	smri_area_cdk_rrmdfr	0.000801623	6595.87	1.26987	0.204176
latent_factor_ss_general_ses	smri_area_cdk_sufr	-0.00118539	6682.81	-2.14781	0.0317646
latent_factor_ss_general_ses	smri_area_cdk_supl	0.00147329	6673.43	2.13389	0.0328881
latent_factor_ss_general_ses	smri_area_cdk_sutm	-0.000139995	6809.95	-0.255229	0.798554
latent_factor_ss_general_ses	smri_area_cdk_sm	0.0013182	6568.66	1.30521	0.191868
latent_factor_ss_general_ses	smri_area_cdk_frpole	0.00025752	6640.68	0.300821	0.763561
latent_factor_ss_general_ses	smri_area_cdk_tmpole	0.000190172	6685.36	0.223241	0.823355
latent_factor_ss_general_ses	smri_area_cdk_trvtm	-0.00106196	6776.43	-1.22307	0.221344
latent_factor_ss_general_ses	smri_area_cdk_insula	-0.000173429	6528.26	-0.32532	0.744949
latent_factor_ss_general_ses	smri_thick_cdk_bankssts	-0.000294739	6663.08	-0.678721	0.497338
latent_factor_ss_general_ses	smri_thick_cdk_cdacate	-0.000134686	6785.05	-0.247703	0.804372
latent_factor_ss_general_ses	smri_thick_cdk_cdmdfr	0.000184011	6646.07	0.67048	0.502575
latent_factor_ss_general_ses	smri_thick_cdk_cuneus	0.000342917	6808.58	0.940033	0.347234
latent_factor_ss_general_ses	smri_thick_cdk_ehinal	0.000370541	6755	0.627435	0.530395
latent_factor_ss_general_ses	smri_thick_cdk_fusiform	-0.000145577	6789.48	-0.640428	0.521916
latent_factor_ss_general_ses	smri_thick_cdk_ifpl	-4.67247e-05	6548.09	-0.213055	0.831291
latent_factor_ss_general_ses	smri_thick_cdk_iftm	-0.000433756	6400.44	-1.69329	0.090449
latent_factor_ss_general_ses	smri_thick_cdk_ihcate	-0.000215441	6943.32	-0.544151	0.586355
latent_factor_ss_general_ses	smri_thick_cdk_locc	-2.79626e-06	6674.96	-0.0118778	0.990523
latent_factor_ss_general_ses	smri_thick_cdk_lobfr	8.95671e-05	6715.27	0.342293	0.732141
latent_factor_ss_general_ses	smri_thick_cdk_lingual	0.000613613	6631.08	2.16544	0.0303895
latent_factor_ss_general_ses	smri_thick_cdk_mobfr	-3.3774e-05	6672.54	-0.101468	0.919182
latent_factor_ss_general_ses	smri_thick_cdk_mdtm	0.00012456	7875	0.466073	0.641176
latent_factor_ss_general_ses	smri_thick_cdk_parahpal	0.000487201	6738.09	1.04034	0.29822
latent_factor_ss_general_ses	smri_thick_cdk_paracn	0.000183403	6583.76	0.653688	0.513336
latent_factor_ss_general_ses	smri_thick_cdk_parsopc	-0.000225939	6631.2	-0.775838	0.437872
latent_factor_ss_general_ses	smri_thick_cdk_parsobis	-0.000246699	6693.97	-0.621991	0.533969
latent_factor_ss_general_ses	smri_thick_cdk_parstgris	-0.000159551	6608.6	-0.51904	0.60375
latent_factor_ss_general_ses	smri_thick_cdk_pericc	-0.000727418	6551.76	-1.66442	0.0960755
latent_factor_ss_general_ses	smri_thick_cdk_postcn	-0.000428677	6678.75	-1.43106	0.152458
latent_factor_ss_general_ses	smri_thick_cdk_ptcate	0.000135687	6845.41	0.401094	0.688364
latent_factor_ss_general_ses	smri_thick_cdk_precn	0.000416107	6454.26	1.51884	0.128853
latent_factor_ss_general_ses	smri_thick_cdk_pc	0.000276684	6660.44	1.44724	0.147877
latent_factor_ss_general_ses	smri_thick_cdk_rracate	0.000238045	6761.38	0.493303	0.621814
latent_factor_ss_general_ses	smri_thick_cdk_rrmdfr	-0.000393494	6746.06	-1.72117	0.0852656
latent_factor_ss_general_ses	smri_thick_cdk_sufr	-0.000433342	6740	-2.5929	0.00953761
latent_factor_ss_general_ses	smri_thick_cdk_supl	0.000273611	6557.36	1.46142	0.143948
latent_factor_ss_general_ses	smri_thick_cdk_sutm	0.000434095	6496.89	1.83392	0.0667123
latent_factor_ss_general_ses	smri_thick_cdk_sm	0.000251542	6372.05	0.92705	0.353936
latent_factor_ss_general_ses	smri_thick_cdk_frpole	-0.00100632	6461.49	-1.68142	0.0927293
latent_factor_ss_general_ses	smri_thick_cdk_tmpole	0.000658607	6478.45	1.28766	0.197912
latent_factor_ss_general_ses	smri_thick_cdk_trvtm	0.000493601	6674.01	1.07885	0.280694
latent_factor_ss_general_ses	smri_thick_cdk_insula	0.000163382	6684.11	0.549329	0.582798
latent_factor_ss_general_ses	smri_vol_scs_cbwmatter	5.03765e-05	6405.35	0.665527	0.505737
latent_factor_ss_general_ses	smri_vol_scs_ltventricle	0.0016498	6846.2	1.00714	0.313901
latent_factor_ss_general_ses	smri_vol_scs_inflatvent	0.00458864	6654.93	1.70589	0.0880745
latent_factor_ss_general_ses	smri_vol_scs_crbwmatter	-0.000504066	6589.59	-1.0827	0.278983
latent_factor_ss_general_ses	smri_vol_scs_crbcortex	0.000154955	6327.57	0.785907	0.431952
latent_factor_ss_general_ses	smri_vol_scs_tp	0.00128107	6683.49	3.85457	0.00011702
latent_factor_ss_general_ses	smri_vol_scs_caudate	0.000853726	6549.56	2.77851	0.0054765
latent_factor_ss_general_ses	smri_vol_scs_putamen	0.000296178	6618.02	0.934868	0.34989
latent_factor_ss_general_ses	smri_vol_scs_pallidum	-0.000451795	6792.63	-0.682814	0.494748
latent_factor_ss_general_ses	smri_vol_scs_hpus	9.2922e-05	6723.73	0.255962	0.797988
latent_factor_ss_general_ses	smri_vol_scs_amygdala	0.000303296	6871.05	0.495221	0.62046
latent_factor_ss_general_ses	smri_vol_scs_vedc	0.000423659	6614.45	1.6039	0.108784
latent_factor_ss_social	smri_area_cdk_bankssts	-0.00080955	7733.45	-0.709692	0.477916
latent_factor_ss_social	smri_area_cdk_cdacate	0.0019683	7723.23	1.15787	0.246953
latent_factor_ss_social	smri_area_cdk_cdmdfr	9.15067e-05	7875	0.0867615	0.930863
latent_factor_ss_social	smri_area_cdk_cuneus	-0.000415416	7696.29	-0.635309	0.525246
latent_factor_ss_social	smri_area_cdk_ehinal	-0.00118704	7739.79	-0.920472	0.357355
latent_factor_ss_social	smri_area_cdk_fusiform	-0.000147531	7721.62	-0.251917	0.801112
latent_factor_ss_social	smri_area_cdk_ifpl	0.000954563	7755.68	1.17746	0.239049
latent_factor_ss_social	smri_area_cdk_iftm	0.000980767	7651.63	1.45501	0.145708
latent_factor_ss_social	smri_area_cdk_ihcate	-0.000221923	7676.63	-0.255401	0.79842
latent_factor_ss_social	smri_area_cdk_locc	0.000886205	7711.68	1.45411	0.145957
latent_factor_ss_social	smri_area_cdk_lobfr	-0.000112741	7815.79	-0.224157	0.822641
latent_factor_ss_social	smri_area_cdk_lingual	0.00039861	7726.55	0.677888	0.497863
latent_factor_ss_social	smri_area_cdk_mobfr	-0.000531785	7732.1	-0.849604	0.395572
latent_factor_ss_social	smri_area_cdk_mdtm	0.000853333	7668.15	1.58459	0.113101
latent_factor_ss_social	smri_area_cdk_parahpal	-0.000641686	7705.93	-0.810189	0.417856
latent_factor_ss_social	smri_area_cdk_paracn	0.000676732	7695.71	0.834004	0.404304
latent_factor_ss_social	smri_area_cdk_parsopc	-0.00191143	7679.43	-1.80088	0.0717615
latent_factor_ss_social	smri_area_cdk_parsobis	-0.000209168	7875	-0.294896	0.768081
latent_factor_ss_social	smri_area_cdk_parstgris	-0.00100743	7641.83	-1.01307	0.311058
latent_factor_ss_social	smri_area_cdk_pericc	-0.000754368	7756.01	-1.1961	0.231696
latent_factor_ss_social	smri_area_cdk_postcn	-0.000211583	7693.14	-0.329528	0.741766
latent_factor_ss_social	smri_area_cdk_ptcate	-0.000150243	7744.88	-0.151444	0.87963
latent_factor_ss_social	smri_area_cdk_precn	0.00026566	7703.09	0.472968	0.63625
latent_factor_ss_social	smri_area_cdk_pc	-0.000897024	7657.26	-1.67817	0.0933555
latent_factor_ss_social	smri_area_cdk_rracate	-2.28793e-05	7668.42	-0.0185145	0.985229
latent_factor_ss_social	smri_area_cdk_rrmdfr	0.000167314	7678.17	0.271146	0.786286
latent_factor_ss_social	smri_area_cdk_sufr	0.000120048	7691.36	0.222447	0.823972
latent_factor_ss_social	smri_area_cdk_supl	-0.000817644	7692.43	-1.21166	0.225682
latent_factor_ss_social	smri_area_cdk_sutm	-0.000614314	7756.7	-1.1506	0.249934
latent_factor_ss_social	smri_area_cdk_sm	-0.0015549	7619.81	-1.56934	0.11661
latent_factor_ss_social	smri_area_cdk_frpole	-0.000525782	7654.55	-0.627045	0.530648
latent_factor_ss_social	smri_area_cdk_tmpole	-0.000548733	7724.72	-0.660853	0.508726
latent_factor_ss_social	smri_area_cdk_trvtm	-0.00113534	7738.45	-1.34156	0.179778
latent_factor_ss_social	smri_area_cdk_insula	-0.000446917	7648.91	-0.85688	0.391538
latent_factor_ss_social	smri_thick_cdk_bankssts	3.89304e-05	7680.33	0.0916718	0.926961
latent_factor_ss_social	smri_thick_cdk_cdacate	0.000436249	7782.69	0.82681	0.40837
latent_factor_ss_social	smri_thick_cdk_cdmdfr	0.000404363	7750.55	1.51598	0.129565
latent_factor_ss_social	smri_thick_cdk_cuneus	0.000211869	7775.19	0.597804	0.549988
latent_factor_ss_social	smri_thick_cdk_ehinal	0.000287887	7765.98	0.501608	0.615957
latent_factor_ss_social	smri_thick_cdk_fusiform	0.000177242	7793.76	0.804341	0.421225
latent_factor_ss_social	smri_thick_cdk_ifpl	0.000109787	7691.44	0.513074	0.607914
latent_factor_ss_social	smri_thick_cdk_iftm	-0.000124438	7595.6	-0.495318	0.62039
latent_factor_ss_social	smri_thick_cdk_ihcate	0.000147516	7773.56	0.382771	0.7019
latent_factor_ss_social	smri_thick_cdk_locc	-0.00025019	7742.62	-1.0922	0.274778
latent_factor_ss_social	smri_thick_cdk_lobfr	0.000209254	7752.72	0.822172	0.411004
latent_factor_ss_social	smri_thick_cdk_lingual	0.000510499	7670.42	1.84211	0.0654984
latent_factor_ss_social	smri_thick_cdk_mobfr	-7.98306e-05	7697.63	-0.245543	0.806043
latent_factor_ss_social	smri_thick_cdk_mdtm	0.000213939	7875	0.815631	0.414736
latent_factor_ss_social	smri_thick_cdk_parahpal	-9.59391e-05	7747.46	-0.21045	0.833322
latent_factor_ss_social	smri_thick_cdk_paracn	-0.000295637	7651.84	-1.07631	0.281825
latent_factor_ss_social	smri_thick_cdk_parsopc	0.000201705	7678.2	0.708357	0.478745
latent_factor_ss_social	smri_thick_cdk_parsobis	0.000208458	7705.21	0.538209	0.590448
latent_factor_ss_social	smri_thick_cdk_parstgris	0.000668569	7708.5	2.23059	0.0257369
latent_factor_ss_social	smri_thick_cdk_pericc	2.63857e-05	7706.13	0.0619248	0.950624
latent_factor_ss_social	smri_thick_cdk_postcn	-0.000102064	7718.24	-0.349351	0.726835
latent_factor_ss_social	smri_thick_cdk_ptcate	0.000586213	7769.73	1.78206	0.0747787
latent_factor_ss_social	smri_thick_cdk_precn	-0.000117164	7594.33	-0.43593	0.6629
latent_factor_ss_social	smri_thick_cdk_pc	0.000364543	7707.55	1.95395	0.0507435
latent_factor_ss_social	smri_thick_cdk_rracate	-0.000345286	7795.12	-0.738441	0.460269
latent_factor_ss_social	smri_thick_cdk_rrmdfr	0.000350463	7845.08	1.59294	0.111213
latent_factor_ss_social	smri_thick_cdk_sufr	-0.000189607	7800.6	-1.17164	0.241378
latent_factor_ss_social	smri_thick_cdk_supl	-9.09023e-05	7711.44	-0.498305	0.618283
latent_factor_ss_social	smri_thick_cdk_sutm	6.0035e-05	7743.9	0.261044	0.794066
latent_factor_ss_social	smri_thick_cdk_sm	-2.33245e-05	7655.77	-0.0880565	0.929834
latent_factor_ss_social	smri_thick_cdk_frpole	-0.000527009	7604.65	-0.89789	0.369273
latent_factor_ss_social	smri_thick_cdk_tmpole	0.000487238	7630.38	0.973015	0.330577
latent_factor_ss_social	smri_thick_cdk_trvtm	-8.37773e-05	7719.74	-0.187784	0.851051
latent_factor_ss_social	smri_thick_cdk_insula	7.15597e-05	7724.75	0.246849	0.805031
latent_factor_ss_social	smri_vol_scs_cbwmatter	-7.23625e-05	7734.98	-0.984267	0.325015
latent_factor_ss_social	smri_vol_scs_ltventricle	0.00183114	7769.75	1.14938	0.250433
latent_factor_ss_social	smri_vol_scs_inflatvent	0.00320201	7697.03	1.2187	0.222994
latent_factor_ss_social	smri_vol_scs_crbwmatter	0.00043091	7742.92	0.952005	0.341124
latent_factor_ss_social	smri_vol_scs_crbcortex	9.34645e-05	7685.56	0.486744	0.626454
latent_factor_ss_social	smri_vol_scs_tp	0.000748895	7685.32	2.30261	0.0213276
latent_factor_ss_social	smri_vol_scs_caudate	0.000392425	7721.41	1.31111	0.189861
latent_factor_ss_social	smri_vol_scs_putamen	0.000247799	7745.14	0.804335	0.421228
latent_factor_ss_social	smri_vol_scs_pallidum	-0.000403334	7801.01	-0.62932	0.529158
latent_factor_ss_social	smri_vol_scs_hpus	-0.000617806	7711.13	-1.74309	0.0813583
latent_factor_ss_social	smri_vol_scs_amygdala	0.000117037	7841.67	0.198322	0.842798
latent_factor_ss_social	smri_vol_scs_vedc	-0.000236917	7641.01	-0.915095	0.360171
latent_factor_ss_perinatal	smri_area_cdk_bankssts	0.00177888	5062.79	1.65148	0.0987021
latent_factor_ss_perinatal	smri_area_cdk_cdacate	0.000161956	5052.03	0.101088	0.919485
latent_factor_ss_perinatal	smri_area_cdk_cdmdfr	0.00120946	7875	1.23519	0.216795
latent_factor_ss_perinatal	smri_area_cdk_cuneus	-0.000438175	4907.3	-0.71329	0.475701
latent_factor_ss_perinatal	smri_area_cdk_ehinal	0.00377281	5081.52	3.0991	0.00195171
latent_factor_ss_perinatal	smri_area_cdk_fusiform	0.000248477	5046.72	0.450249	0.65255
latent_factor_ss_perinatal	smri_area_cdk_ifpl	0.000797682	5231.5	1.03947	0.298632
latent_factor_ss_perinatal	smri_area_cdk_iftm	0.00241267	4879.17	3.84812	0.000120551
latent_factor_ss_perinatal	smri_area_cdk_ihcate	-0.00147872	4985.25	-1.82309	0.06835
latent_factor_ss_perinatal	smri_area_cdk_locc	-0.000110511	5018.57	-0.192685	0.847214
latent_factor_ss_perinatal	smri_area_cdk_lobfr	-0.00315543	5252.66	-6.56139	5.84323e-11
latent_factor_ss_perinatal	smri_area_cdk_lingual	-8.31273e-07	5015.22	-0.00149774	0.998805
latent_factor_ss_perinatal	smri_area_cdk_mobfr	-0.000787977	5029.91	-1.33225	0.18284
latent_factor_ss_perinatal	smri_area_cdk_mdtm	-0.000255139	4701.26	-0.504932	0.61363
latent_factor_ss_perinatal	smri_area_cdk_parahpal	-0.00227182	5047.55	-3.05828	0.00223782
latent_factor_ss_perinatal	smri_area_cdk_paracn	-1.71617e-06	5021.8	-0.00225556	0.9982
latent_factor_ss_perinatal	smri_area_cdk_parsopc	-0.000748664	4843.69	-0.751909	0.452142
latent_factor_ss_perinatal	smri_area_cdk_parsobis	-0.000522991	7875	-0.794162	0.427125
latent_factor_ss_perinatal	smri_area_cdk_parstgris	-0.00220695	4753.56	-2.38051	0.0173279
latent_factor_ss_perinatal	smri_area_cdk_pericc	8.68228e-05	5092.5	0.145094	0.884642
latent_factor_ss_perinatal	smri_area_cdk_postcn	1.92136e-05	4932.16	0.0318869	0.974564
latent_factor_ss_perinatal	smri_area_cdk_ptcate	-0.000406398	5259.43	-0.434085	0.664244
latent_factor_ss_perinatal	smri_area_cdk_precn	0.00104091	5030.73	1.97452	0.0483769
latent_factor_ss_perinatal	smri_area_cdk_pc	0.00151315	4847	3.03779	0.00239591
latent_factor_ss_perinatal	smri_area_cdk_rracate	0.000325229	4852.18	0.281406	0.778411
latent_factor_ss_perinatal	smri_area_cdk_rrmdfr	-0.000878907	4800.48	-1.51899	0.128832
latent_factor_ss_perinatal	smri_area_cdk_sufr	0.000592971	4954.81	1.1721	0.241214
latent_factor_ss_perinatal	smri_area_cdk_supl	-2.65215e-05	4941.55	-0.0418815	0.966595
latent_factor_ss_perinatal	smri_area_cdk_sutm	-0.000666775	5272.9	-1.32004	0.186879
latent_factor_ss_perinatal	smri_area_cdk_sm	-0.000555494	4677.52	-0.603037	0.546513
latent_factor_ss_perinatal	smri_area_cdk_frpole	-5.49344e-05	4832.62	-0.0702146	0.944026
latent_factor_ss_perinatal	smri_area_cdk_tmpole	0.00185904	4990.51	2.37535	0.0175701
latent_factor_ss_perinatal	smri_area_cdk_trvtm	-0.00413667	5168.12	-5.19283	2.15062e-07
latent_factor_ss_perinatal	smri_area_cdk_insula	0.000753762	4666.84	1.5445	0.122534
latent_factor_ss_perinatal	smri_thick_cdk_bankssts	0.000565379	4902.88	1.42168	0.155183
latent_factor_ss_perinatal	smri_thick_cdk_cdacate	-0.00112562	5290.34	-2.24161	0.0250277
latent_factor_ss_perinatal	smri_thick_cdk_cdmdfr	-0.00029644	4996.41	-1.17124	0.24156
latent_factor_ss_perinatal	smri_thick_cdk_cuneus	0.000166169	5317.19	0.493469	0.621702
latent_factor_ss_perinatal	smri_thick_cdk_ehinal	0.000426283	5208.35	0.78235	0.434045
latent_factor_ss_perinatal	smri_thick_cdk_fusiform	0.000680622	5311.8	3.24115	0.00119784
latent_factor_ss_perinatal	smri_thick_cdk_ifpl	0.000667757	4701.87	3.32098	0.00090385
latent_factor_ss_perinatal	smri_thick_cdk_iftm	0.000383269	4420.33	1.63901	0.101283
latent_factor_ss_perinatal	smri_thick_cdk_ihcate	-0.00176003	5504.36	-4.83829	1.34535e-06
latent_factor_ss_perinatal	smri_thick_cdk_locc	-0.000236105	5040.32	-1.08849	0.276431
latent_factor_ss_perinatal	smri_thick_cdk_lobfr	-0.000361013	5109.3	-1.49705	0.134442
latent_factor_ss_perinatal	smri_thick_cdk_lingual	5.96791e-05	4838.61	0.229946	0.818144
latent_factor_ss_perinatal	smri_thick_cdk_mobfr	0.000175791	4949.61	0.575681	0.564857
latent_factor_ss_perinatal	smri_thick_cdk_mdtm	0.00028523	7875	1.17124	0.24154
latent_factor_ss_perinatal	smri_thick_cdk_parahpal	-0.000710872	5135.16	-1.64848	0.0993155
latent_factor_ss_perinatal	smri_thick_cdk_paracn	-0.000510246	4744.72	-1.98892	0.0467674
latent_factor_ss_perinatal	smri_thick_cdk_parsopc	-0.000243684	4847.22	-0.913471	0.36104
latent_factor_ss_perinatal	smri_thick_cdk_parsobis	-0.000355643	4987.3	-0.977268	0.328484
latent_factor_ss_perinatal	smri_thick_cdk_parstgris	0.000351878	4874.19	1.24546	0.213021
latent_factor_ss_perinatal	smri_thick_cdk_pericc	-0.000869841	4790.46	-2.16375	0.0305329
latent_factor_ss_perinatal	smri_thick_cdk_postcn	-0.000303645	4993.71	-1.10278	0.270177
latent_factor_ss_perinatal	smri_thick_cdk_ptcate	-0.000294724	5361.38	-0.945032	0.344685
latent_factor_ss_perinatal	smri_thick_cdk_precn	9.41622e-05	4484.54	0.376688	0.706423
latent_factor_ss_perinatal	smri_thick_cdk_pc	-0.000216126	4955.9	-1.2308	0.218456
latent_factor_ss_perinatal	smri_thick_cdk_rracate	-0.00221998	5255.59	-4.98479	6.402e-07
latent_factor_ss_perinatal	smri_thick_cdk_rrmdfr	-0.000556926	5424.63	-2.61837	0.00885959
latent_factor_ss_perinatal	smri_thick_cdk_sufr	-0.000974918	5210.02	-6.32137	2.80855e-10
latent_factor_ss_perinatal	smri_thick_cdk_supl	0.00025456	4790.88	1.47808	0.139451
latent_factor_ss_perinatal	smri_thick_cdk_sutm	-0.000157328	4774.46	-0.719772	0.471701
latent_factor_ss_perinatal	smri_thick_cdk_sm	0.000764446	4441.55	3.07146	0.00214307
latent_factor_ss_perinatal	smri_thick_cdk_frpole	0.000875572	4499.26	1.60292	0.109023
latent_factor_ss_perinatal	smri_thick_cdk_tmpole	-0.000371074	4569.5	-0.793038	0.427797
latent_factor_ss_perinatal	smri_thick_cdk_trvtm	-0.00152096	4967.76	-3.62122	0.000296139
latent_factor_ss_perinatal	smri_thick_cdk_insula	0.000225187	5007.98	0.823455	0.410289
latent_factor_ss_perinatal	smri_vol_scs_cbwmatter	6.3301e-05	4627.1	0.905718	0.365133
latent_factor_ss_perinatal	smri_vol_scs_ltventricle	0.00220636	5364.96	1.46113	0.144038
latent_factor_ss_perinatal	smri_vol_scs_inflatvent	-0.00135469	4913.89	-0.54891	0.583092
latent_factor_ss_perinatal	smri_vol_scs_crbwmatter	0.000133348	4908.04	0.310486	0.756205
latent_factor_ss_perinatal	smri_vol_scs_crbcortex	-0.000438802	4456.25	-2.41749	0.0156679
latent_factor_ss_perinatal	smri_vol_scs_tp	-0.000864184	4937.28	-2.83773	0.00456213
latent_factor_ss_perinatal	smri_vol_scs_caudate	-0.000239476	4818.68	-0.845734	0.397743
latent_factor_ss_perinatal	smri_vol_scs_putamen	0.000417317	4960.35	1.42823	0.153289
latent_factor_ss_perinatal	smri_vol_scs_pallidum	-0.00119834	5357.45	-1.95667	0.0504386
latent_factor_ss_perinatal	smri_vol_scs_hpus	-0.000357936	5047.14	-1.07458	0.282615
latent_factor_ss_perinatal	smri_vol_scs_amygdala	-0.00166864	5622.7	-2.93259	0.00337504
latent_factor_ss_perinatal	smri_vol_scs_vedc	0.000921023	4764.85	3.82354	0.000133232
nihtbx_fluidcomp_uncorrected	smri_area_cdk_bankssts	4.58944e-05	10606.7	0.551168	0.58153
nihtbx_fluidcomp_uncorrected	smri_area_cdk_cdacate	0.000235212	10628.1	1.88639	0.0592697
nihtbx_fluidcomp_uncorrected	smri_area_cdk_cdmdfr	0.000167109	10533.4	2.14285	0.0321483
nihtbx_fluidcomp_uncorrected	smri_area_cdk_cuneus	0.000120282	10534.4	2.50016	0.0124287
nihtbx_fluidcomp_uncorrected	smri_area_cdk_ehinal	1.22522e-05	10641.6	0.129708	0.8968
nihtbx_fluidcomp_uncorrected	smri_area_cdk_fusiform	8.42795e-05	10571.2	1.93379	0.0531655
nihtbx_fluidcomp_uncorrected	smri_area_cdk_ifpl	-0.000158328	10631.8	-2.68804	0.00719849
nihtbx_fluidcomp_uncorrected	smri_area_cdk_iftm	4.55639e-05	10579.2	0.915402	0.360002
nihtbx_fluidcomp_uncorrected	smri_area_cdk_ihcate	-2.45091e-05	10544.1	-0.384882	0.700333
nihtbx_fluidcomp_uncorrected	smri_area_cdk_locc	2.27152e-05	10553.5	0.503324	0.614747
nihtbx_fluidcomp_uncorrected	smri_area_cdk_lobfr	-0.000174586	10697.3	-4.68311	2.86026e-06
nihtbx_fluidcomp_uncorrected	smri_area_cdk_lingual	-2.53727e-05	10551.1	-0.585786	0.558032
nihtbx_fluidcomp_uncorrected	smri_area_cdk_mobfr	-6.80465e-05	10628.9	-1.48783	0.136824
nihtbx_fluidcomp_uncorrected	smri_area_cdk_mdtm	1.33384e-05	10541.2	0.334273	0.73818
nihtbx_fluidcomp_uncorrected	smri_area_cdk_parahpal	0.000123971	10600.7	2.13615	0.0326903
nihtbx_fluidcomp_uncorrected	smri_area_cdk_paracn	-9.24609e-05	10541.6	-1.5658	0.117425
nihtbx_fluidcomp_uncorrected	smri_area_cdk_parsopc	9.38906e-05	10541.7	1.21012	0.226262
nihtbx_fluidcomp_uncorrected	smri_area_cdk_parsobis	-6.95736e-05	10485.7	-1.32569	0.184972
nihtbx_fluidcomp_uncorrected	smri_area_cdk_parstgris	4.24815e-05	10565.6	0.580799	0.561388
nihtbx_fluidcomp_uncorrected	smri_area_cdk_pericc	8.00048e-05	10582.2	1.72102	0.085276
nihtbx_fluidcomp_uncorrected	smri_area_cdk_postcn	3.29738e-05	10517	0.695993	0.486449
nihtbx_fluidcomp_uncorrected	smri_area_cdk_ptcate	6.60904e-05	10625	0.906843	0.364511
nihtbx_fluidcomp_uncorrected	smri_area_cdk_precn	3.11238e-05	10509.6	0.756595	0.449309
nihtbx_fluidcomp_uncorrected	smri_area_cdk_pc	-2.84364e-05	10579.9	-0.723875	0.469158
nihtbx_fluidcomp_uncorrected	smri_area_cdk_rracate	-1.14584e-05	10564.2	-0.12551	0.900122
nihtbx_fluidcomp_uncorrected	smri_area_cdk_rrmdfr	-4.50604e-06	10516.3	-0.0991583	0.921014
nihtbx_fluidcomp_uncorrected	smri_area_cdk_sufr	-6.30112e-05	10548.4	-1.58475	0.113054
nihtbx_fluidcomp_uncorrected	smri_area_cdk_supl	4.84212e-05	10581.9	0.972535	0.330807
nihtbx_fluidcomp_uncorrected	smri_area_cdk_sutm	3.64121e-05	10602.6	0.9317	0.351513
nihtbx_fluidcomp_uncorrected	smri_area_cdk_sm	0.000103163	10544	1.40878	0.158928
nihtbx_fluidcomp_uncorrected	smri_area_cdk_frpole	6.99063e-05	10588.1	1.13194	0.257686
nihtbx_fluidcomp_uncorrected	smri_area_cdk_tmpole	8.93526e-05	10618.4	1.47078	0.141381
nihtbx_fluidcomp_uncorrected	smri_area_cdk_trvtm	-0.000112669	10637.7	-1.82308	0.0683192
nihtbx_fluidcomp_uncorrected	smri_area_cdk_insula	-1.83801e-05	10463.9	-0.479067	0.631901
nihtbx_fluidcomp_uncorrected	smri_thick_cdk_bankssts	-3.46498e-05	10521.2	-1.10786	0.267947
nihtbx_fluidcomp_uncorrected	smri_thick_cdk_cdacate	8.70348e-06	10682.5	0.223467	0.823176
nihtbx_fluidcomp_uncorrected	smri_thick_cdk_cdmdfr	-2.56963e-06	10627.2	-0.129382	0.897058
nihtbx_fluidcomp_uncorrected	smri_thick_cdk_cuneus	2.15751e-05	10627.9	0.821997	0.411097
nihtbx_fluidcomp_uncorrected	smri_thick_cdk_ehinal	0.000116894	10580.2	2.74315	0.00609549
nihtbx_fluidcomp_uncorrected	smri_thick_cdk_fusiform	2.92692e-05	10697.5	1.80506	0.0710927
nihtbx_fluidcomp_uncorrected	smri_thick_cdk_ifpl	1.74669e-05	10540	1.09429	0.273855
nihtbx_fluidcomp_uncorrected	smri_thick_cdk_iftm	-8.68747e-07	10503.4	-0.0464469	0.962955
nihtbx_fluidcomp_uncorrected	smri_thick_cdk_ihcate	-6.8713e-05	10636.1	-2.42411	0.0153625
nihtbx_fluidcomp_uncorrected	smri_thick_cdk_locc	-1.59913e-06	10603	-0.0942946	0.924877
nihtbx_fluidcomp_uncorrected	smri_thick_cdk_lobfr	8.51461e-06	10610.3	0.449006	0.653436
nihtbx_fluidcomp_uncorrected	smri_thick_cdk_lingual	4.4645e-05	10547.3	2.16569	0.0303576
nihtbx_fluidcomp_uncorrected	smri_thick_cdk_mobfr	1.69164e-06	10649.4	0.0707422	0.943604
nihtbx_fluidcomp_uncorrected	smri_thick_cdk_mdtm	1.55689e-05	10441.3	0.787821	0.430819
nihtbx_fluidcomp_uncorrected	smri_thick_cdk_parahpal	0.000106557	10634.6	3.16978	0.00152986
nihtbx_fluidcomp_uncorrected	smri_thick_cdk_paracn	-9.41985e-06	10534.3	-0.467025	0.640491
nihtbx_fluidcomp_uncorrected	smri_thick_cdk_parsopc	-3.69286e-05	10566	-1.74225	0.0814932
nihtbx_fluidcomp_uncorrected	smri_thick_cdk_parsobis	2.12729e-05	10516.6	0.745429	0.456029
nihtbx_fluidcomp_uncorrected	smri_thick_cdk_parstgris	-3.3693e-05	10555.6	-1.49906	0.133889
nihtbx_fluidcomp_uncorrected	smri_thick_cdk_pericc	-7.16897e-05	10564.3	-2.27504	0.0229233
nihtbx_fluidcomp_uncorrected	smri_thick_cdk_postcn	-1.02483e-05	10574.6	-0.470402	0.638078
nihtbx_fluidcomp_uncorrected	smri_thick_cdk_ptcate	-4.02994e-05	10656.2	-1.65558	0.0978366
nihtbx_fluidcomp_uncorrected	smri_thick_cdk_precn	-8.76157e-06	10425.7	-0.43765	0.661649
nihtbx_fluidcomp_uncorrected	smri_thick_cdk_pc	4.47366e-06	10564.2	0.32301	0.746694
nihtbx_fluidcomp_uncorrected	smri_thick_cdk_rracate	-3.60389e-05	10673.2	-1.03693	0.299794
nihtbx_fluidcomp_uncorrected	smri_thick_cdk_rrmdfr	-2.74396e-05	10761.6	-1.67847	0.0932838
nihtbx_fluidcomp_uncorrected	smri_thick_cdk_sufr	-4.41315e-05	10700.1	-3.67367	0.000240258
nihtbx_fluidcomp_uncorrected	smri_thick_cdk_supl	-3.74468e-06	10618.7	-0.276809	0.781932
nihtbx_fluidcomp_uncorrected	smri_thick_cdk_sutm	-6.75369e-07	10664.5	-0.0393431	0.968618
nihtbx_fluidcomp_uncorrected	smri_thick_cdk_sm	5.47501e-06	10524	0.273293	0.784634
nihtbx_fluidcomp_uncorrected	smri_thick_cdk_frpole	-9.78402e-05	10396.7	-2.25133	0.0243854
nihtbx_fluidcomp_uncorrected	smri_thick_cdk_tmpole	2.62609e-05	10433.5	0.709169	0.478236
nihtbx_fluidcomp_uncorrected	smri_thick_cdk_trvtm	-2.8117e-05	10591.6	-0.850456	0.395091
nihtbx_fluidcomp_uncorrected	smri_thick_cdk_insula	5.16703e-05	10580.7	2.40968	0.0159834
nihtbx_fluidcomp_uncorrected	smri_vol_scs_cbwmatter	6.00465e-07	9262.37	0.0701882	0.944045
nihtbx_fluidcomp_uncorrected	smri_vol_scs_ltventricle	-1.71207e-05	10652.8	-0.146876	0.883233
nihtbx_fluidcomp_uncorrected	smri_vol_scs_inflatvent	0.000461918	10553.4	2.40066	0.0163826
nihtbx_fluidcomp_uncorrected	smri_vol_scs_crbwmatter	5.36538e-05	10543	1.60063	0.109488
nihtbx_fluidcomp_uncorrected	smri_vol_scs_crbcortex	-1.66611e-05	10565.2	-1.1837	0.236559
nihtbx_fluidcomp_uncorrected	smri_vol_scs_tp	8.1411e-05	10590.8	3.40803	0.000656781
nihtbx_fluidcomp_uncorrected	smri_vol_scs_caudate	1.27183e-05	10664.5	0.580832	0.561366
nihtbx_fluidcomp_uncorrected	smri_vol_scs_putamen	5.26246e-05	10584.8	2.34008	0.0192981
nihtbx_fluidcomp_uncorrected	smri_vol_scs_pallidum	-0.00011266	10643.5	-2.4034	0.0162604
nihtbx_fluidcomp_uncorrected	smri_vol_scs_hpus	6.19739e-05	10586.5	2.35368	0.0186069
nihtbx_fluidcomp_uncorrected	smri_vol_scs_amygdala	2.17322e-05	10755.8	0.504857	0.61367
nihtbx_fluidcomp_uncorrected	smri_vol_scs_vedc	-9.60786e-06	10480.1	-0.504554	0.613883
nihtbx_cryst_uncorrected	smri_area_cdk_bankssts	-0.000147024	16956.1	-1.39645	0.162597
nihtbx_cryst_uncorrected	smri_area_cdk_cdacate	7.68812e-05	16989.2	0.483846	0.628501
nihtbx_cryst_uncorrected	smri_area_cdk_cdmdfr	0.000109332	16603	1.0837	0.278511
nihtbx_cryst_uncorrected	smri_area_cdk_cuneus	1.24435e-05	16861	0.200321	0.841232
nihtbx_cryst_uncorrected	smri_area_cdk_ehinal	7.86162e-05	15860.6	0.626255	0.531157
nihtbx_cryst_uncorrected	smri_area_cdk_fusiform	-9.83987e-06	16928.8	-0.177218	0.859339
nihtbx_cryst_uncorrected	smri_area_cdk_ifpl	-9.84352e-05	16967.4	-1.32553	0.185012
nihtbx_cryst_uncorrected	smri_area_cdk_iftm	-6.74303e-05	16765.2	-1.05475	0.291556
nihtbx_cryst_uncorrected	smri_area_cdk_ihcate	7.28005e-05	16550.3	0.880164	0.378783
nihtbx_cryst_uncorrected	smri_area_cdk_locc	1.64255e-05	16989.1	0.287316	0.773874
nihtbx_cryst_uncorrected	smri_area_cdk_lobfr	-0.000257191	15938	-5.26723	1.40296e-07
nihtbx_cryst_uncorrected	smri_area_cdk_lingual	8.83199e-05	16861.6	1.59765	0.11014
nihtbx_cryst_uncorrected	smri_area_cdk_mobfr	4.93083e-05	15525.3	0.809046	0.418501
nihtbx_cryst_uncorrected	smri_area_cdk_mdtm	-7.64723e-05	16846.5	-1.50791	0.131597
nihtbx_cryst_uncorrected	smri_area_cdk_parahpal	-8.42489e-05	16262.2	-1.10036	0.271192
nihtbx_cryst_uncorrected	smri_area_cdk_paracn	-6.23816e-06	16721	-0.0822567	0.934444
nihtbx_cryst_uncorrected	smri_area_cdk_parsopc	0.000143189	16932.9	1.44924	0.147288
nihtbx_cryst_uncorrected	smri_area_cdk_parsobis	-0.000169685	16616.4	-2.49099	0.0127485
nihtbx_cryst_uncorrected	smri_area_cdk_parstgris	-4.38917e-06	16764.5	-0.0466648	0.962781
nihtbx_cryst_uncorrected	smri_area_cdk_pericc	1.52437e-05	16691.6	0.254313	0.799257
nihtbx_cryst_uncorrected	smri_area_cdk_postcn	0.000146944	16582.1	2.42168	0.0154598
nihtbx_cryst_uncorrected	smri_area_cdk_ptcate	0.000239918	16967.2	2.58695	0.00969117
nihtbx_cryst_uncorrected	smri_area_cdk_precn	0.000136983	16260.1	2.5582	0.0105306
nihtbx_cryst_uncorrected	smri_area_cdk_pc	-0.000155239	16637.6	-3.08117	0.00206524
nihtbx_cryst_uncorrected	smri_area_cdk_rracate	-3.59868e-05	16754.3	-0.304518	0.760737
nihtbx_cryst_uncorrected	smri_area_cdk_rrmdfr	9.6619e-05	16610.6	1.65066	0.0988261
nihtbx_cryst_uncorrected	smri_area_cdk_sufr	-7.92066e-05	16545.4	-1.53788	0.124096
nihtbx_cryst_uncorrected	smri_area_cdk_supl	-4.77836e-05	16464.7	-0.754743	0.450414
nihtbx_cryst_uncorrected	smri_area_cdk_sutm	0.000139499	16804.6	2.79487	0.00519798
nihtbx_cryst_uncorrected	smri_area_cdk_sm	-1.69474e-05	16721.3	-0.180723	0.856588
nihtbx_cryst_uncorrected	smri_area_cdk_frpole	2.1131e-05	15419	0.256464	0.797596
nihtbx_cryst_uncorrected	smri_area_cdk_tmpole	0.000184107	15518.4	2.30226	0.0213335
nihtbx_cryst_uncorrected	smri_area_cdk_trvtm	7.43783e-05	16710.1	0.930454	0.352149
nihtbx_cryst_uncorrected	smri_area_cdk_insula	5.72108e-06	13556.6	0.111466	0.911249
nihtbx_cryst_uncorrected	smri_thick_cdk_bankssts	3.12807e-05	16670.6	0.783943	0.433085
nihtbx_cryst_uncorrected	smri_thick_cdk_cdacate	1.59753e-06	16731.4	0.0321623	0.974343
nihtbx_cryst_uncorrected	smri_thick_cdk_cdmdfr	-3.64859e-05	15724.3	-1.41344	0.157547
nihtbx_cryst_uncorrected	smri_thick_cdk_cuneus	6.82474e-05	16502.9	2.01998	0.0434015
nihtbx_cryst_uncorrected	smri_thick_cdk_ehinal	0.000190394	14709	3.42475	0.000617055
nihtbx_cryst_uncorrected	smri_thick_cdk_fusiform	5.79605e-05	16479.8	2.77258	0.00556767
nihtbx_cryst_uncorrected	smri_thick_cdk_ifpl	1.64928e-05	15776.3	0.80028	0.423561
nihtbx_cryst_uncorrected	smri_thick_cdk_iftm	-1.16153e-06	16064.4	-0.0479018	0.961795
nihtbx_cryst_uncorrected	smri_thick_cdk_ihcate	-0.000175991	16298.7	-4.8108	1.51673e-06
nihtbx_cryst_uncorrected	smri_thick_cdk_locc	1.00252e-05	16577.2	0.459984	0.645534
nihtbx_cryst_uncorrected	smri_thick_cdk_lobfr	4.56915e-06	14719.3	0.184055	0.853973
nihtbx_cryst_uncorrected	smri_thick_cdk_lingual	6.3475e-05	16389.9	2.38059	0.0172964
nihtbx_cryst_uncorrected	smri_thick_cdk_mobfr	-1.357e-05	15158.3	-0.432093	0.66568
nihtbx_cryst_uncorrected	smri_thick_cdk_mdtm	-9.20159e-06	15727.6	-0.358069	0.720296
nihtbx_cryst_uncorrected	smri_thick_cdk_parahpal	0.000231154	16610.5	5.30809	1.12206e-07
nihtbx_cryst_uncorrected	smri_thick_cdk_paracn	-4.51268e-05	16087.6	-1.71624	0.0861373
nihtbx_cryst_uncorrected	smri_thick_cdk_parsopc	-0.000100424	15830.8	-3.60992	0.000307236
nihtbx_cryst_uncorrected	smri_thick_cdk_parsobis	-6.57947e-05	15888.7	-1.76172	0.0781357
nihtbx_cryst_uncorrected	smri_thick_cdk_parstgris	-4.72391e-05	15560.6	-1.61742	0.105808
nihtbx_cryst_uncorrected	smri_thick_cdk_pericc	-5.31816e-06	16270.6	-0.128747	0.897559
nihtbx_cryst_uncorrected	smri_thick_cdk_postcn	3.2779e-05	15632.4	1.16548	0.243844
nihtbx_cryst_uncorrected	smri_thick_cdk_ptcate	-9.29976e-05	16523.9	-2.96994	0.00298287
nihtbx_cryst_uncorrected	smri_thick_cdk_precn	-7.12413e-05	15247.5	-2.70689	0.00679921
nihtbx_cryst_uncorrected	smri_thick_cdk_pc	-2.26661e-05	16090.5	-1.25921	0.207971
nihtbx_cryst_uncorrected	smri_thick_cdk_rracate	-8.3058e-05	16009.2	-1.83726	0.0661903
nihtbx_cryst_uncorrected	smri_thick_cdk_rrmdfr	-3.41586e-05	15837.1	-1.60388	0.108759
nihtbx_cryst_uncorrected	smri_thick_cdk_sufr	-8.00471e-05	16082.7	-5.1006	3.42431e-07
nihtbx_cryst_uncorrected	smri_thick_cdk_supl	8.14253e-06	15770.9	0.46343	0.643063
nihtbx_cryst_uncorrected	smri_thick_cdk_sutm	-2.22593e-05	16240.1	-1.00643	0.314224
nihtbx_cryst_uncorrected	smri_thick_cdk_sm	-1.24721e-05	15416.7	-0.485951	0.627009
nihtbx_cryst_uncorrected	smri_thick_cdk_frpole	-5.17278e-05	15601.8	-0.913566	0.360959
nihtbx_cryst_uncorrected	smri_thick_cdk_tmpole	4.7477e-05	14517.8	0.975317	0.32942
nihtbx_cryst_uncorrected	smri_thick_cdk_trvtm	-9.74987e-05	16285	-2.27365	0.0230001
nihtbx_cryst_uncorrected	smri_thick_cdk_insula	7.28871e-05	14630.7	2.5703	0.0101708
nihtbx_cryst_uncorrected	smri_vol_scs_cbwmatter	5.98725e-06	13855.1	0.588182	0.55642
nihtbx_cryst_uncorrected	smri_vol_scs_ltventricle	-6.96019e-05	17004.6	-0.463379	0.643099
nihtbx_cryst_uncorrected	smri_vol_scs_inflatvent	0.000622174	16419.7	2.44817	0.0143687
nihtbx_cryst_uncorrected	smri_vol_scs_crbwmatter	-5.20581e-05	13268.1	-1.15876	0.246575
nihtbx_cryst_uncorrected	smri_vol_scs_crbcortex	-4.22055e-05	16042.3	-2.29183	0.0219284
nihtbx_cryst_uncorrected	smri_vol_scs_tp	1.07257e-05	14513.7	0.328056	0.742874
nihtbx_cryst_uncorrected	smri_vol_scs_caudate	-1.43505e-05	16099.2	-0.508218	0.611307
nihtbx_cryst_uncorrected	smri_vol_scs_putamen	6.97085e-05	14264.2	2.38453	0.0171138
nihtbx_cryst_uncorrected	smri_vol_scs_pallidum	-0.000198695	13947.8	-3.26609	0.00109306
nihtbx_cryst_uncorrected	smri_vol_scs_hpus	4.53905e-05	15899.2	1.30909	0.190523
nihtbx_cryst_uncorrected	smri_vol_scs_amygdala	2.51705e-06	15580.7	0.0437192	0.965129
nihtbx_cryst_uncorrected	smri_vol_scs_vedc	1.74166e-05	13175.4	0.695766	0.486588
nihtbx_totalcomp_uncorrected	smri_area_cdk_bankssts	-1.43574e-05	10469.6	-0.14041	0.888339
nihtbx_totalcomp_uncorrected	smri_area_cdk_cdacate	0.000329577	10507.4	2.15356	0.031297
nihtbx_totalcomp_uncorrected	smri_area_cdk_cdmdfr	0.000233284	10400.6	2.43874	0.0147551
nihtbx_totalcomp_uncorrected	smri_area_cdk_cuneus	0.000126999	10392.8	2.15005	0.0315741
nihtbx_totalcomp_uncorrected	smri_area_cdk_ehinal	4.09564e-05	10518.2	0.35308	0.724036
nihtbx_totalcomp_uncorrected	smri_area_cdk_fusiform	8.92052e-05	10436.2	1.66803	0.095339
nihtbx_totalcomp_uncorrected	smri_area_cdk_ifpl	-0.000179806	10504.4	-2.48578	0.0129421
nihtbx_totalcomp_uncorrected	smri_area_cdk_iftm	4.96454e-05	10452	0.812579	0.416478
nihtbx_totalcomp_uncorrected	smri_area_cdk_ihcate	1.00431e-05	10411.2	0.128492	0.897762
nihtbx_totalcomp_uncorrected	smri_area_cdk_locc	1.65251e-05	10412.3	0.298321	0.765464
nihtbx_totalcomp_uncorrected	smri_area_cdk_lobfr	-0.000276159	10566.5	-6.03418	1.65128e-09
nihtbx_totalcomp_uncorrected	smri_area_cdk_lingual	1.05998e-06	10406.7	0.019936	0.984095
nihtbx_totalcomp_uncorrected	smri_area_cdk_mobfr	-2.92976e-05	10504.3	-0.521674	0.601908
nihtbx_totalcomp_uncorrected	smri_area_cdk_mdtm	-6.84737e-07	10391.9	-0.013981	0.988845
nihtbx_totalcomp_uncorrected	smri_area_cdk_parahpal	7.97359e-05	10470.7	1.11864	0.263318
nihtbx_totalcomp_uncorrected	smri_area_cdk_paracn	-9.08679e-05	10407.8	-1.2539	0.209907
nihtbx_totalcomp_uncorrected	smri_area_cdk_parsopc	0.00017772	10393.4	1.86682	0.0619545
nihtbx_totalcomp_uncorrected	smri_area_cdk_parsobis	-9.73584e-05	10340.2	-1.51215	0.130527
nihtbx_totalcomp_uncorrected	smri_area_cdk_parstgris	5.2757e-05	10436.8	0.587631	0.556793
nihtbx_totalcomp_uncorrected	smri_area_cdk_pericc	8.7044e-05	10440.7	1.52533	0.127207
nihtbx_totalcomp_uncorrected	smri_area_cdk_postcn	8.59787e-05	10368.7	1.47899	0.139173
nihtbx_totalcomp_uncorrected	smri_area_cdk_ptcate	0.000136301	10504.1	1.52366	0.127623
nihtbx_totalcomp_uncorrected	smri_area_cdk_precn	7.66927e-05	10365.2	1.51963	0.128635
nihtbx_totalcomp_uncorrected	smri_area_cdk_pc	-6.67529e-05	10452.9	-1.3846	0.166206
nihtbx_totalcomp_uncorrected	smri_area_cdk_rracate	-1.87747e-05	10422.3	-0.167569	0.866925
nihtbx_totalcomp_uncorrected	smri_area_cdk_rrmdfr	1.51488e-05	10364.1	0.271698	0.78586
nihtbx_totalcomp_uncorrected	smri_area_cdk_sufr	-9.26443e-05	10413	-1.89871	0.0576299
nihtbx_totalcomp_uncorrected	smri_area_cdk_supl	2.10142e-05	10443.8	0.343837	0.730976
nihtbx_totalcomp_uncorrected	smri_area_cdk_sutm	7.54876e-05	10472.8	1.57341	0.115654
nihtbx_totalcomp_uncorrected	smri_area_cdk_sm	9.16588e-05	10413.3	1.02023	0.307641
nihtbx_totalcomp_uncorrected	smri_area_cdk_frpole	7.2911e-05	10471.4	0.962243	0.33595
nihtbx_totalcomp_uncorrected	smri_area_cdk_tmpole	0.000139452	10491.8	1.87015	0.0614913
nihtbx_totalcomp_uncorrected	smri_area_cdk_trvtm	-0.000100608	10516.5	-1.32587	0.184913
nihtbx_totalcomp_uncorrected	smri_area_cdk_insula	-3.68139e-05	10308.9	-0.782187	0.434123
nihtbx_totalcomp_uncorrected	smri_thick_cdk_bankssts	-3.15911e-05	10374.3	-0.823303	0.410354
nihtbx_totalcomp_uncorrected	smri_thick_cdk_cdacate	2.11838e-05	10560.2	0.442786	0.657929
nihtbx_totalcomp_uncorrected	smri_thick_cdk_cdmdfr	-1.75718e-05	10477.6	-0.720624	0.471157
nihtbx_totalcomp_uncorrected	smri_thick_cdk_cuneus	4.29773e-05	10498.8	1.33329	0.182465
nihtbx_totalcomp_uncorrected	smri_thick_cdk_ehinal	0.000178549	10444.6	3.41324	0.000644393
nihtbx_totalcomp_uncorrected	smri_thick_cdk_fusiform	5.34939e-05	10573	2.68487	0.00726709
nihtbx_totalcomp_uncorrected	smri_thick_cdk_ifpl	2.12773e-05	10380	1.08589	0.277551
nihtbx_totalcomp_uncorrected	smri_thick_cdk_iftm	-7.24315e-06	10353	-0.315599	0.752313
nihtbx_totalcomp_uncorrected	smri_thick_cdk_ihcate	-0.000127296	10512.7	-3.66059	0.000252873
nihtbx_totalcomp_uncorrected	smri_thick_cdk_locc	-5.13063e-06	10461.1	-0.246418	0.805364
nihtbx_totalcomp_uncorrected	smri_thick_cdk_lobfr	1.94225e-05	10480.5	0.834072	0.404259
nihtbx_totalcomp_uncorrected	smri_thick_cdk_lingual	8.96153e-05	10405.5	3.54382	0.00039611
nihtbx_totalcomp_uncorrected	smri_thick_cdk_mobfr	-9.07009e-07	10543.1	-0.0308986	0.975351
nihtbx_totalcomp_uncorrected	smri_thick_cdk_mdtm	6.61453e-06	10286.7	0.272882	0.78495
nihtbx_totalcomp_uncorrected	smri_thick_cdk_parahpal	0.000185932	10499.2	4.5089	6.58698e-06
nihtbx_totalcomp_uncorrected	smri_thick_cdk_paracn	-2.75403e-05	10395	-1.11278	0.265827
nihtbx_totalcomp_uncorrected	smri_thick_cdk_parsopc	-8.07225e-05	10434.8	-3.10432	0.00191225
nihtbx_totalcomp_uncorrected	smri_thick_cdk_parsobis	4.95129e-06	10373.5	0.141397	0.887559
nihtbx_totalcomp_uncorrected	smri_thick_cdk_parstgris	-5.41319e-05	10403.3	-1.96254	0.0497257
nihtbx_totalcomp_uncorrected	smri_thick_cdk_pericc	-8.52711e-05	10413.1	-2.20445	0.0275145
nihtbx_totalcomp_uncorrected	smri_thick_cdk_postcn	4.4605e-06	10432.1	0.166796	0.867534
nihtbx_totalcomp_uncorrected	smri_thick_cdk_ptcate	-7.06716e-05	10537.1	-2.36474	0.0180605
nihtbx_totalcomp_uncorrected	smri_thick_cdk_precn	-3.30813e-05	10263.2	-1.347	0.178008
nihtbx_totalcomp_uncorrected	smri_thick_cdk_pc	1.19431e-06	10424.8	0.0702485	0.943997
nihtbx_totalcomp_uncorrected	smri_thick_cdk_rracate	-5.08561e-05	10548.3	-1.19088	0.233728
nihtbx_totalcomp_uncorrected	smri_thick_cdk_rrmdfr	-3.83525e-05	10652.9	-1.90906	0.0562807
nihtbx_totalcomp_uncorrected	smri_thick_cdk_sufr	-7.57429e-05	10570.1	-5.13483	2.87425e-07
nihtbx_totalcomp_uncorrected	smri_thick_cdk_supl	3.28085e-06	10484.5	0.197512	0.84343
nihtbx_totalcomp_uncorrected	smri_thick_cdk_sutm	-9.85963e-06	10534	-0.467706	0.640005
nihtbx_totalcomp_uncorrected	smri_thick_cdk_sm	-1.98005e-06	10343.1	-0.0805252	0.935821
nihtbx_totalcomp_uncorrected	smri_thick_cdk_frpole	-0.000100519	10238.8	-1.88577	0.0593547
nihtbx_totalcomp_uncorrected	smri_thick_cdk_tmpole	4.4773e-05	10276.3	0.985508	0.324398
nihtbx_totalcomp_uncorrected	smri_thick_cdk_trvtm	-6.55979e-05	10457.7	-1.61648	0.106021
nihtbx_totalcomp_uncorrected	smri_thick_cdk_insula	9.27698e-05	10437.4	3.5263	0.000423218
nihtbx_totalcomp_uncorrected	smri_vol_scs_cbwmatter	4.50617e-06	9876.37	0.423519	0.671926
nihtbx_totalcomp_uncorrected	smri_vol_scs_ltventricle	-2.65198e-05	10531.2	-0.185329	0.852975
nihtbx_totalcomp_uncorrected	smri_vol_scs_inflatvent	0.000715828	10406.3	3.03269	0.00242978
nihtbx_totalcomp_uncorrected	smri_vol_scs_crbwmatter	1.92968e-05	10374.2	0.46885	0.639186
nihtbx_totalcomp_uncorrected	smri_vol_scs_crbcortex	-3.83585e-05	10393.5	-2.21959	0.0264684
nihtbx_totalcomp_uncorrected	smri_vol_scs_tp	7.54511e-05	10471.2	2.57292	0.0100981
nihtbx_totalcomp_uncorrected	smri_vol_scs_caudate	-3.96516e-06	10538.1	-0.147433	0.882793
nihtbx_totalcomp_uncorrected	smri_vol_scs_putamen	7.46762e-05	10439.2	2.70517	0.00683808
nihtbx_totalcomp_uncorrected	smri_vol_scs_pallidum	-0.000190022	10513.8	-3.302	0.00096319
nihtbx_totalcomp_uncorrected	smri_vol_scs_hpus	8.0604e-05	10450.3	2.49286	0.0126871
nihtbx_totalcomp_uncorrected	smri_vol_scs_amygdala	1.87362e-05	10654.2	0.354059	0.723302
nihtbx_totalcomp_uncorrected	smri_vol_scs_vedc	-5.79199e-07	10345.6	-0.0248022	0.980213
lmt_scr_avg_rt	smri_area_cdk_bankssts	-3.56988e-10	14971.5	-1.65141	0.0986754
lmt_scr_avg_rt	smri_area_cdk_cdacate	-2.1518e-10	15363.4	-0.630854	0.528146
lmt_scr_avg_rt	smri_area_cdk_cdmdfr	1.60933e-11	15811.9	0.074266	0.9408
lmt_scr_avg_rt	smri_area_cdk_cuneus	3.57612e-11	15292.9	0.274249	0.783897
lmt_scr_avg_rt	smri_area_cdk_ehinal	1.46066e-10	17189.2	0.506721	0.612357
lmt_scr_avg_rt	smri_area_cdk_fusiform	1.17552e-10	15069.1	1.02154	0.307015
lmt_scr_avg_rt	smri_area_cdk_ifpl	-2.38545e-12	15018.2	-0.0156161	0.987541
lmt_scr_avg_rt	smri_area_cdk_iftm	3.76606e-11	15437.7	0.279234	0.780069
lmt_scr_avg_rt	smri_area_cdk_ihcate	-1.87157e-11	16166.3	-0.10318	0.917821
lmt_scr_avg_rt	smri_area_cdk_locc	-1.32927e-11	14916.5	-0.113247	0.909836
lmt_scr_avg_rt	smri_area_cdk_lobfr	-5.63989e-11	17143.5	-0.503389	0.614698
lmt_scr_avg_rt	smri_area_cdk_lingual	6.08026e-11	15156	0.528603	0.597089
lmt_scr_avg_rt	smri_area_cdk_mobfr	5.5036e-11	17694.2	0.383585	0.70129
lmt_scr_avg_rt	smri_area_cdk_mdtm	-2.33614e-11	15348.1	-0.218536	0.827015
lmt_scr_avg_rt	smri_area_cdk_parahpal	3.39583e-11	16883.3	0.193249	0.846766
lmt_scr_avg_rt	smri_area_cdk_paracn	-7.84221e-11	15488.7	-0.491941	0.622768
lmt_scr_avg_rt	smri_area_cdk_parsopc	-1.98816e-11	15154.1	-0.0966594	0.922998
lmt_scr_avg_rt	smri_area_cdk_parsobis	1.76325e-10	15693.4	1.21244	0.225362
lmt_scr_avg_rt	smri_area_cdk_parstgris	1.08176e-11	15483	0.0546489	0.956419
lmt_scr_avg_rt	smri_area_cdk_pericc	9.69289e-12	15581.8	0.0756514	0.939697
lmt_scr_avg_rt	smri_area_cdk_postcn	5.81074e-11	15832	0.446296	0.65539
lmt_scr_avg_rt	smri_area_cdk_ptcate	-3.96865e-11	15015.9	-0.208587	0.834774
lmt_scr_avg_rt	smri_area_cdk_precn	-6.48161e-11	16265.3	-0.5542	0.57945
lmt_scr_avg_rt	smri_area_cdk_pc	5.10887e-11	15731.9	0.476388	0.633805
lmt_scr_avg_rt	smri_area_cdk_rracate	4.73399e-11	15581.7	0.187439	0.851319
lmt_scr_avg_rt	smri_area_cdk_rrmdfr	1.14259e-10	15891.6	0.900083	0.36809
lmt_scr_avg_rt	smri_area_cdk_sufr	4.28665e-11	15891.3	0.385092	0.700174
lmt_scr_avg_rt	smri_area_cdk_supl	-9.18659e-11	16078	-0.664968	0.50608
lmt_scr_avg_rt	smri_area_cdk_sutm	3.34526e-11	15404.9	0.318998	0.749732
lmt_scr_avg_rt	smri_area_cdk_sm	-1.06605e-10	15564	-0.537563	0.590886
lmt_scr_avg_rt	smri_area_cdk_frpole	9.83532e-11	17632.3	0.508676	0.610986
lmt_scr_avg_rt	smri_area_cdk_tmpole	-4.47629e-11	17659.8	-0.239115	0.811019
lmt_scr_avg_rt	smri_area_cdk_trvtm	1.52192e-10	15797.6	0.88797	0.37457
lmt_scr_avg_rt	smri_area_cdk_insula	-3.71968e-11	19814.3	-0.273234	0.784676
lmt_scr_avg_rt	smri_thick_cdk_bankssts	-4.68877e-11	15735.6	-0.549986	0.582337
lmt_scr_avg_rt	smri_thick_cdk_cdacate	5.95584e-11	15659.5	0.561618	0.574384
lmt_scr_avg_rt	smri_thick_cdk_cdmdfr	-1.1049e-10	17112.3	-1.87821	0.0603689
lmt_scr_avg_rt	smri_thick_cdk_cuneus	-1.69143e-11	15960.6	-0.231413	0.816997
lmt_scr_avg_rt	smri_thick_cdk_ehinal	-1.32196e-10	18446.9	-0.991183	0.321609
lmt_scr_avg_rt	smri_thick_cdk_fusiform	-5.02216e-11	16115.3	-1.09313	0.274351
lmt_scr_avg_rt	smri_thick_cdk_ifpl	6.64664e-11	17110.9	1.41768	0.156303
lmt_scr_avg_rt	smri_thick_cdk_iftm	3.29445e-11	16797.5	0.604036	0.545828
lmt_scr_avg_rt	smri_thick_cdk_ihcate	-7.81494e-11	16334	-0.972599	0.330767
lmt_scr_avg_rt	smri_thick_cdk_locc	-1.08898e-11	15941.5	-0.230575	0.817648
lmt_scr_avg_rt	smri_thick_cdk_lobfr	3.18065e-11	18562.9	0.52746	0.59788
lmt_scr_avg_rt	smri_thick_cdk_lingual	-9.90139e-11	16111.6	-1.69841	0.0894505
lmt_scr_avg_rt	smri_thick_cdk_mobfr	-2.4416e-11	18060.3	-0.32902	0.742144
lmt_scr_avg_rt	smri_thick_cdk_mdtm	9.93596e-12	17249.7	0.169805	0.865166
lmt_scr_avg_rt	smri_thick_cdk_parahpal	-2.05094e-11	15930.3	-0.217093	0.828139
lmt_scr_avg_rt	smri_thick_cdk_paracn	3.27458e-11	16594.7	0.557177	0.577414
lmt_scr_avg_rt	smri_thick_cdk_parsopc	1.31577e-10	17035.4	2.08286	0.0372792
lmt_scr_avg_rt	smri_thick_cdk_parsobis	1.66967e-11	16920.7	0.197987	0.843058
lmt_scr_avg_rt	smri_thick_cdk_parstgris	6.42286e-11	17465	0.949669	0.342293
lmt_scr_avg_rt	smri_thick_cdk_pericc	-1.36884e-10	16422.5	-1.49284	0.135497
lmt_scr_avg_rt	smri_thick_cdk_postcn	9.14824e-13	17346.8	0.0141722	0.988693
lmt_scr_avg_rt	smri_thick_cdk_ptcate	1.4671e-11	16174.3	0.214647	0.830045
lmt_scr_avg_rt	smri_thick_cdk_precn	4.11505e-12	17915.3	0.0656955	0.947621
lmt_scr_avg_rt	smri_thick_cdk_pc	1.10112e-11	16693.1	0.27351	0.784465
lmt_scr_avg_rt	smri_thick_cdk_rracate	-1.55107e-10	16822.9	-1.52456	0.127387
lmt_scr_avg_rt	smri_thick_cdk_rrmdfr	3.02874e-11	17281.9	0.616634	0.537484
lmt_scr_avg_rt	smri_thick_cdk_sufr	-7.56351e-11	16796.1	-2.13942	0.0324161
lmt_scr_avg_rt	smri_thick_cdk_supl	4.38891e-11	17204	1.09335	0.274256
lmt_scr_avg_rt	smri_thick_cdk_sutm	2.35202e-11	16445.9	0.480425	0.630932
lmt_scr_avg_rt	smri_thick_cdk_sm	6.88548e-11	17583.5	1.15948	0.246275
lmt_scr_avg_rt	smri_thick_cdk_frpole	-4.00525e-11	17232.8	-0.309236	0.757146
lmt_scr_avg_rt	smri_thick_cdk_tmpole	2.4924e-11	18624.8	0.209324	0.834198
lmt_scr_avg_rt	smri_thick_cdk_trvtm	-2.08498e-11	16403.5	-0.2208	0.825251
lmt_scr_avg_rt	smri_thick_cdk_insula	1.013e-11	18675.9	0.146378	0.883625
lmt_scr_avg_rt	smri_vol_scs_cbwmatter	8.13826e-14	18962.2	0.00328819	0.997376
lmt_scr_avg_rt	smri_vol_scs_ltventricle	9.16617e-11	14930	0.294949	0.768037
lmt_scr_avg_rt	smri_vol_scs_inflatvent	1.01026e-09	16354.3	1.78557	0.074188
lmt_scr_avg_rt	smri_vol_scs_crbwmatter	-6.97629e-11	19871.2	-0.574126	0.565889
lmt_scr_avg_rt	smri_vol_scs_crbcortex	1.20797e-12	16687.8	0.0278106	0.977814
lmt_scr_avg_rt	smri_vol_scs_tp	1.14032e-10	19079.4	1.37747	0.168384
lmt_scr_avg_rt	smri_vol_scs_caudate	-2.9635e-11	16788.4	-0.466764	0.640675
lmt_scr_avg_rt	smri_vol_scs_putamen	-2.80206e-11	19151.7	-0.385459	0.699902
lmt_scr_avg_rt	smri_vol_scs_pallidum	-1.75698e-10	19567.7	-1.13866	0.254859
lmt_scr_avg_rt	smri_vol_scs_hpus	-3.57764e-11	17202.6	-0.44852	0.653784
lmt_scr_avg_rt	smri_vol_scs_amygdala	-1.22546e-10	17735.6	-0.900059	0.368101
lmt_scr_avg_rt	smri_vol_scs_vedc	-1.66649e-10	19810.7	-2.54766	0.0108524
pea_wiscv_trs	smri_area_cdk_bankssts	-0.000488068	10678.4	-2.1694	0.0300745
pea_wiscv_trs	smri_area_cdk_cdacate	-4.57899e-05	10678.9	-0.135679	0.892078
pea_wiscv_trs	smri_area_cdk_cdmdfr	5.30966e-06	10627.4	0.0251929	0.979902
pea_wiscv_trs	smri_area_cdk_cuneus	0.000187833	10638.3	1.4428	0.149107
pea_wiscv_trs	smri_area_cdk_ehinal	0.000207917	10693.6	0.815297	0.41492
pea_wiscv_trs	smri_area_cdk_fusiform	0.000141357	10662.5	1.19742	0.231171
pea_wiscv_trs	smri_area_cdk_ifpl	-0.000521564	10687.7	-3.27336	0.00106613
pea_wiscv_trs	smri_area_cdk_iftm	4.95546e-05	10661.1	0.367358	0.713359
pea_wiscv_trs	smri_area_cdk_ihcate	0.000140978	10653.9	0.817439	0.413696
pea_wiscv_trs	smri_area_cdk_locc	0.000117957	10629.1	0.96468	0.334727
pea_wiscv_trs	smri_area_cdk_lobfr	-0.0002456	10719.7	-2.43984	0.0147098
pea_wiscv_trs	smri_area_cdk_lingual	2.10629e-05	10650.9	0.180055	0.857113
pea_wiscv_trs	smri_area_cdk_mobfr	-0.000215009	10689.7	-1.74119	0.0816794
pea_wiscv_trs	smri_area_cdk_mdtm	-9.09952e-05	10659	-0.8451	0.398074
pea_wiscv_trs	smri_area_cdk_parahpal	4.92739e-05	10671.4	0.313855	0.753637
pea_wiscv_trs	smri_area_cdk_paracn	0.000107631	10626.4	0.674096	0.500265
pea_wiscv_trs	smri_area_cdk_parsopc	-0.000192416	10648.6	-0.916695	0.359323
pea_wiscv_trs	smri_area_cdk_parsobis	-1.61359e-05	10614.6	-0.1138	0.909399
pea_wiscv_trs	smri_area_cdk_parstgris	0.000164579	10634.2	0.832874	0.404935
pea_wiscv_trs	smri_area_cdk_pericc	1.2901e-05	10664.1	0.10255	0.918322
pea_wiscv_trs	smri_area_cdk_postcn	0.000220224	10639.8	1.7134	0.0866672
pea_wiscv_trs	smri_area_cdk_ptcate	0.000362485	10680.4	1.83255	0.066897
pea_wiscv_trs	smri_area_cdk_precn	0.000128367	10631.6	1.15407	0.248497
pea_wiscv_trs	smri_area_cdk_pc	-9.13807e-05	10667	-0.858285	0.390754
pea_wiscv_trs	smri_area_cdk_rracate	3.02564e-05	10650.1	0.122754	0.902304
pea_wiscv_trs	smri_area_cdk_rrmdfr	-9.61979e-05	10637	-0.781014	0.434812
pea_wiscv_trs	smri_area_cdk_sufr	-0.000216458	10645	-2.02012	0.0433958
pea_wiscv_trs	smri_area_cdk_supl	0.000159368	10662.9	1.18647	0.235463
pea_wiscv_trs	smri_area_cdk_sutm	0.000131188	10680.5	1.24034	0.214878
pea_wiscv_trs	smri_area_cdk_sm	0.000470926	10649.7	2.37962	0.017348
pea_wiscv_trs	smri_area_cdk_frpole	6.23476e-05	10675.5	0.372504	0.709525
pea_wiscv_trs	smri_area_cdk_tmpole	0.000227424	10681.9	1.38534	0.165979
pea_wiscv_trs	smri_area_cdk_trvtm	-6.12325e-05	10686.2	-0.367341	0.713372
pea_wiscv_trs	smri_area_cdk_insula	-6.24095e-06	10646.1	-0.0600503	0.952117
pea_wiscv_trs	smri_thick_cdk_bankssts	7.99508e-05	10631.4	0.94488	0.344742
pea_wiscv_trs	smri_thick_cdk_cdacate	-0.000116888	10701.8	-1.11326	0.265624
pea_wiscv_trs	smri_thick_cdk_cdmdfr	-1.88427e-05	10698.3	-0.351482	0.725234
pea_wiscv_trs	smri_thick_cdk_cuneus	8.17638e-05	10677.9	1.15398	0.248534
pea_wiscv_trs	smri_thick_cdk_ehinal	0.000275936	10680.2	2.39118	0.0168116
pea_wiscv_trs	smri_thick_cdk_fusiform	0.000126096	10717.7	2.88501	0.00392184
pea_wiscv_trs	smri_thick_cdk_ifpl	-7.75063e-06	10653	-0.179775	0.857332
pea_wiscv_trs	smri_thick_cdk_iftm	7.23689e-06	10639.5	0.143304	0.886053
pea_wiscv_trs	smri_thick_cdk_ihcate	-0.000138747	10698.8	-1.81544	0.0694849
pea_wiscv_trs	smri_thick_cdk_locc	-4.64389e-05	10687	-1.01412	0.310551
pea_wiscv_trs	smri_thick_cdk_lobfr	0.000160734	10692.9	3.14122	0.00168702
pea_wiscv_trs	smri_thick_cdk_lingual	8.55257e-05	10655.6	1.52912	0.126264
pea_wiscv_trs	smri_thick_cdk_mobfr	5.06884e-05	10699.4	0.785376	0.432251
pea_wiscv_trs	smri_thick_cdk_mdtm	-6.25225e-05	10612	-1.16764	0.242979
pea_wiscv_trs	smri_thick_cdk_parahpal	0.000328005	10700.6	3.61232	0.000304862
pea_wiscv_trs	smri_thick_cdk_paracn	3.52147e-05	10652.9	0.648097	0.516936
pea_wiscv_trs	smri_thick_cdk_parsopc	-2.46527e-05	10665.8	-0.430043	0.667173
pea_wiscv_trs	smri_thick_cdk_parsobis	-8.91369e-06	10644.7	-0.1155	0.908051
pea_wiscv_trs	smri_thick_cdk_parstgris	7.57053e-06	10671.9	0.124495	0.900925
pea_wiscv_trs	smri_thick_cdk_pericc	1.8262e-05	10662.6	0.214292	0.830323
pea_wiscv_trs	smri_thick_cdk_postcn	8.89804e-06	10684.7	0.151624	0.879486
pea_wiscv_trs	smri_thick_cdk_ptcate	-0.000131552	10701.6	-2.00282	0.0452218
pea_wiscv_trs	smri_thick_cdk_precn	7.23844e-05	10626.5	1.34106	0.17993
pea_wiscv_trs	smri_thick_cdk_pc	-1.32265e-05	10659.5	-0.352756	0.724278
pea_wiscv_trs	smri_thick_cdk_rracate	-1.79194e-05	10706.5	-0.191081	0.848465
pea_wiscv_trs	smri_thick_cdk_rrmdfr	-5.41935e-05	10725.6	-1.23169	0.218094
pea_wiscv_trs	smri_thick_cdk_sufr	-2.53405e-05	10718.4	-0.782485	0.433947
pea_wiscv_trs	smri_thick_cdk_supl	-4.25843e-05	10685	-1.16534	0.243907
pea_wiscv_trs	smri_thick_cdk_sutm	6.46996e-07	10705.1	0.0139666	0.988857
pea_wiscv_trs	smri_thick_cdk_sm	8.70165e-05	10664.4	1.61035	0.107351
pea_wiscv_trs	smri_thick_cdk_frpole	-0.000169105	10567.7	-1.43777	0.150529
pea_wiscv_trs	smri_thick_cdk_tmpole	-3.8131e-05	10612.5	-0.3805	0.703582
pea_wiscv_trs	smri_thick_cdk_trvtm	-1.13129e-06	10684.8	-0.0126405	0.989915
pea_wiscv_trs	smri_thick_cdk_insula	0.00010124	10691.4	1.74409	0.081172
pea_wiscv_trs	smri_vol_scs_cbwmatter	-8.58436e-06	8171.71	-0.376736	0.70638
pea_wiscv_trs	smri_vol_scs_ltventricle	-0.000249101	10697	-0.789429	0.429879
pea_wiscv_trs	smri_vol_scs_inflatvent	0.000443119	10660.1	0.849824	0.395442
pea_wiscv_trs	smri_vol_scs_crbwmatter	7.39203e-05	10681	0.818422	0.413135
pea_wiscv_trs	smri_vol_scs_crbcortex	-5.21352e-05	10684	-1.37173	0.170175
pea_wiscv_trs	smri_vol_scs_tp	9.89818e-05	10673.5	1.52974	0.12611
pea_wiscv_trs	smri_vol_scs_caudate	4.23235e-05	10705.8	0.714106	0.475177
pea_wiscv_trs	smri_vol_scs_putamen	2.22418e-05	10688.6	0.365757	0.714554
pea_wiscv_trs	smri_vol_scs_pallidum	-0.000138736	10705.7	-1.09255	0.274616
pea_wiscv_trs	smri_vol_scs_hpus	0.000121833	10669.8	1.7133	0.0866868
pea_wiscv_trs	smri_vol_scs_amygdala	5.35422e-05	10726	0.460759	0.644981
pea_wiscv_trs	smri_vol_scs_vedc	-3.80368e-05	10631.8	-0.73726	0.460981
cbcl_scr_syn_internal_r	smri_area_cdk_bankssts	5.97095e-05	19320.5	0.604464	0.545543
cbcl_scr_syn_internal_r	smri_area_cdk_cdacate	0.000161865	19539.2	1.04282	0.297046
cbcl_scr_syn_internal_r	smri_area_cdk_cdmdfr	-1.30156e-05	19674.1	-0.134494	0.893013
cbcl_scr_syn_internal_r	smri_area_cdk_cuneus	-1.50199e-05	19480.1	-0.254088	0.79943
cbcl_scr_syn_internal_r	smri_area_cdk_ehinal	0.00017696	19597.9	1.42738	0.153486
cbcl_scr_syn_internal_r	smri_area_cdk_fusiform	-6.19357e-05	19374.2	-1.1815	0.237417
cbcl_scr_syn_internal_r	smri_area_cdk_ifpl	-6.01025e-05	19340	-0.859519	0.390065
cbcl_scr_syn_internal_r	smri_area_cdk_iftm	5.52061e-05	19561.1	0.905948	0.364975
cbcl_scr_syn_internal_r	smri_area_cdk_ihcate	-0.000108367	19720.7	-1.34874	0.177437
cbcl_scr_syn_internal_r	smri_area_cdk_locc	-6.04256e-06	19264.9	-0.1124	0.910508
cbcl_scr_syn_internal_r	smri_area_cdk_lobfr	0.000118073	19600.7	2.44297	0.0145756
cbcl_scr_syn_internal_r	smri_area_cdk_lingual	7.06318e-05	19457.1	1.34635	0.178206
cbcl_scr_syn_internal_r	smri_area_cdk_mobfr	-3.54369e-05	19406.9	-0.583191	0.559771
cbcl_scr_syn_internal_r	smri_area_cdk_mdtm	0.00012398	19531.2	2.56547	0.0103111
cbcl_scr_syn_internal_r	smri_area_cdk_parahpal	4.93088e-05	19681.4	0.646729	0.517815
cbcl_scr_syn_internal_r	smri_area_cdk_paracn	-9.7179e-06	19589.8	-0.135085	0.892546
cbcl_scr_syn_internal_r	smri_area_cdk_parsopc	-3.13298e-05	19390.4	-0.335887	0.73696
cbcl_scr_syn_internal_r	smri_area_cdk_parsobis	3.8179e-05	19661.7	0.584205	0.559089
cbcl_scr_syn_internal_r	smri_area_cdk_parstgris	-3.10093e-05	19581.6	-0.346187	0.729206
cbcl_scr_syn_internal_r	smri_area_cdk_pericc	8.6068e-06	19613.3	0.149563	0.881111
cbcl_scr_syn_internal_r	smri_area_cdk_postcn	-7.35567e-05	19696.3	-1.26266	0.206728
cbcl_scr_syn_internal_r	smri_area_cdk_ptcate	-6.16304e-05	19318.4	-0.706502	0.479884
cbcl_scr_syn_internal_r	smri_area_cdk_precn	4.75514e-05	19730.3	0.919089	0.35806
cbcl_scr_syn_internal_r	smri_area_cdk_pc	-2.47307e-05	19647.4	-0.515088	0.606498
cbcl_scr_syn_internal_r	smri_area_cdk_rracate	6.88954e-05	19618.3	0.606764	0.544014
cbcl_scr_syn_internal_r	smri_area_cdk_rrmdfr	-2.89975e-05	19705.4	-0.512733	0.608144
cbcl_scr_syn_internal_r	smri_area_cdk_sufr	4.32903e-05	19701.1	0.871985	0.383227
cbcl_scr_syn_internal_r	smri_area_cdk_supl	-1.68104e-05	19722.6	-0.275205	0.783162
cbcl_scr_syn_internal_r	smri_area_cdk_sutm	1.40636e-05	19521.3	0.29668	0.766714
cbcl_scr_syn_internal_r	smri_area_cdk_sm	1.26733e-05	19621.2	0.141848	0.887202
cbcl_scr_syn_internal_r	smri_area_cdk_frpole	8.38548e-05	19378.6	1.01998	0.307752
cbcl_scr_syn_internal_r	smri_area_cdk_tmpole	-4.64602e-05	19409.7	-0.584526	0.558873
cbcl_scr_syn_internal_r	smri_area_cdk_trvtm	6.73382e-05	19655	0.876201	0.380931
cbcl_scr_syn_internal_r	smri_area_cdk_insula	1.99928e-05	17014.8	0.372543	0.709493
cbcl_scr_syn_internal_r	smri_thick_cdk_bankssts	-3.23e-05	19667.8	-0.845508	0.397837
cbcl_scr_syn_internal_r	smri_thick_cdk_cdacate	0.000101418	19647.4	2.13168	0.0330454
cbcl_scr_syn_internal_r	smri_thick_cdk_cdmdfr	-1.06692e-05	19578.1	-0.420601	0.674051
cbcl_scr_syn_internal_r	smri_thick_cdk_cuneus	3.24687e-05	19709.8	0.999069	0.317774
cbcl_scr_syn_internal_r	smri_thick_cdk_ehinal	-0.00012351	18824.7	-2.2217	0.0263152
cbcl_scr_syn_internal_r	smri_thick_cdk_fusiform	-4.68487e-06	19723.6	-0.23103	0.817294
cbcl_scr_syn_internal_r	smri_thick_cdk_ifpl	-6.14958e-05	19565.9	-3.04324	0.00234357
cbcl_scr_syn_internal_r	smri_thick_cdk_iftm	-1.70165e-05	19683.8	-0.717315	0.473189
cbcl_scr_syn_internal_r	smri_thick_cdk_ihcate	2.36813e-05	19730.6	0.668166	0.504035
cbcl_scr_syn_internal_r	smri_thick_cdk_locc	-2.44173e-05	19706.3	-1.16122	0.245565
cbcl_scr_syn_internal_r	smri_thick_cdk_lobfr	-4.4665e-05	18697.8	-1.78967	0.0735232
cbcl_scr_syn_internal_r	smri_thick_cdk_lingual	-2.11661e-05	19729.1	-0.817956	0.413392
cbcl_scr_syn_internal_r	smri_thick_cdk_mobfr	-4.18697e-05	19134.3	-1.34155	0.179756
cbcl_scr_syn_internal_r	smri_thick_cdk_mdtm	-3.13462e-05	19536.4	-1.24287	0.213931
cbcl_scr_syn_internal_r	smri_thick_cdk_parahpal	3.02103e-05	19701.7	0.715997	0.474002
cbcl_scr_syn_internal_r	smri_thick_cdk_paracn	4.61935e-05	19702.9	1.79889	0.072051
cbcl_scr_syn_internal_r	smri_thick_cdk_parsopc	-4.2106e-05	19624.6	-1.54022	0.123523
cbcl_scr_syn_internal_r	smri_thick_cdk_parsobis	2.70348e-05	19637.5	0.738212	0.460395
cbcl_scr_syn_internal_r	smri_thick_cdk_parstgris	-3.26762e-05	19459.4	-1.13076	0.258169
cbcl_scr_syn_internal_r	smri_thick_cdk_pericc	-1.7664e-05	19725.8	-0.438748	0.660849
cbcl_scr_syn_internal_r	smri_thick_cdk_postcn	-1.61697e-05	19472.3	-0.585124	0.558471
cbcl_scr_syn_internal_r	smri_thick_cdk_ptcate	3.65227e-05	19719.8	1.20753	0.227243
cbcl_scr_syn_internal_r	smri_thick_cdk_precn	-3.17017e-05	19098.1	-1.20403	0.228593
cbcl_scr_syn_internal_r	smri_thick_cdk_pc	-2.09627e-06	19696.6	-0.119484	0.904893
cbcl_scr_syn_internal_r	smri_thick_cdk_rracate	7.33653e-07	19675.2	0.0165742	0.986776
cbcl_scr_syn_internal_r	smri_thick_cdk_rrmdfr	4.69396e-06	19563.9	0.222847	0.823657
cbcl_scr_syn_internal_r	smri_thick_cdk_sufr	1.12233e-05	19678.7	0.729956	0.465426
cbcl_scr_syn_internal_r	smri_thick_cdk_supl	-1.04725e-05	19578.5	-0.606631	0.544103
cbcl_scr_syn_internal_r	smri_thick_cdk_sutm	7.29938e-06	19725.4	0.340015	0.733849
cbcl_scr_syn_internal_r	smri_thick_cdk_sm	-5.00608e-05	19334.6	-1.97932	0.0477946
cbcl_scr_syn_internal_r	smri_thick_cdk_frpole	0.000107223	19523.5	1.92768	0.0539094
cbcl_scr_syn_internal_r	smri_thick_cdk_tmpole	-0.000100935	18635.7	-2.05266	0.0401195
cbcl_scr_syn_internal_r	smri_thick_cdk_trvtm	9.52599e-06	19727	0.229344	0.818604
cbcl_scr_syn_internal_r	smri_thick_cdk_insula	-1.9038e-05	18645.2	-0.66622	0.505279
cbcl_scr_syn_internal_r	smri_vol_scs_cbwmatter	1.63409e-05	18391	1.60364	0.10881
cbcl_scr_syn_internal_r	smri_vol_scs_ltventricle	7.25423e-05	19239.1	0.508069	0.611411
cbcl_scr_syn_internal_r	smri_vol_scs_inflatvent	-0.000492914	19730	-1.98627	0.0470168
cbcl_scr_syn_internal_r	smri_vol_scs_crbwmatter	6.09247e-05	16708.4	1.29332	0.195918
cbcl_scr_syn_internal_r	smri_vol_scs_crbcortex	2.48609e-05	19608.8	1.35605	0.175097
cbcl_scr_syn_internal_r	smri_vol_scs_tp	-3.95218e-05	18339.5	-1.17203	0.241199
cbcl_scr_syn_internal_r	smri_vol_scs_caudate	-2.15479e-05	19663.9	-0.778676	0.43618
cbcl_scr_syn_internal_r	smri_vol_scs_putamen	-1.34071e-05	18131.4	-0.452508	0.650909
cbcl_scr_syn_internal_r	smri_vol_scs_pallidum	7.65518e-05	17519.9	1.2416	0.214401
cbcl_scr_syn_internal_r	smri_vol_scs_hpus	7.61606e-06	19587.5	0.222814	0.823683
cbcl_scr_syn_internal_r	smri_vol_scs_amygdala	3.32942e-06	19375.6	0.0576686	0.954013
cbcl_scr_syn_internal_r	smri_vol_scs_vedc	-4.20738e-05	16839.3	-1.63348	0.102387
cbcl_scr_syn_external_r	smri_area_cdk_bankssts	-0.000109708	19454	-1.09685	0.272721
cbcl_scr_syn_external_r	smri_area_cdk_cdacate	0.000263011	19626.1	1.67455	0.0940393
cbcl_scr_syn_external_r	smri_area_cdk_cdmdfr	0.000244001	19715	2.4936	0.0126537
cbcl_scr_syn_external_r	smri_area_cdk_cuneus	1.7488e-05	19581.5	0.292296	0.770063
cbcl_scr_syn_external_r	smri_area_cdk_ehinal	0.000133831	19509.2	1.06933	0.284936
cbcl_scr_syn_external_r	smri_area_cdk_fusiform	7.19493e-05	19498	1.35569	0.175213
cbcl_scr_syn_external_r	smri_area_cdk_ifpl	9.9468e-05	19469.7	1.40492	0.16006
cbcl_scr_syn_external_r	smri_area_cdk_iftm	8.00146e-05	19642.8	1.29772	0.194397
cbcl_scr_syn_external_r	smri_area_cdk_ihcate	-0.000228188	19730.9	-2.80993	0.00496011
cbcl_scr_syn_external_r	smri_area_cdk_locc	-9.28739e-06	19407.2	-0.170589	0.864549
cbcl_scr_syn_external_r	smri_area_cdk_lobfr	0.00013908	19512.7	2.85064	0.00436771
cbcl_scr_syn_external_r	smri_area_cdk_lingual	-2.75488e-05	19564.5	-0.518775	0.603924
cbcl_scr_syn_external_r	smri_area_cdk_mobfr	8.22735e-05	19281	1.34211	0.179575
cbcl_scr_syn_external_r	smri_area_cdk_mdtm	9.52788e-05	19621.7	1.94815	0.0514117
cbcl_scr_syn_external_r	smri_area_cdk_parahpal	-3.19512e-05	19621	-0.41496	0.678175
cbcl_scr_syn_external_r	smri_area_cdk_paracn	-1.83597e-05	19663	-0.252255	0.800847
cbcl_scr_syn_external_r	smri_area_cdk_parsopc	-0.00019416	19509	-2.05639	0.0397586
cbcl_scr_syn_external_r	smri_area_cdk_parsobis	-5.62346e-07	19709.1	-0.00850813	0.993212
cbcl_scr_syn_external_r	smri_area_cdk_parstgris	-0.000216955	19656.7	-2.39428	0.0166626
cbcl_scr_syn_external_r	smri_area_cdk_pericc	4.74331e-06	19679.2	0.0814797	0.935061
cbcl_scr_syn_external_r	smri_area_cdk_postcn	9.46083e-05	19725.9	1.60619	0.108248
cbcl_scr_syn_external_r	smri_area_cdk_ptcate	-6.69269e-05	19451.1	-0.75767	0.448658
cbcl_scr_syn_external_r	smri_area_cdk_precn	8.48944e-05	19711.6	1.62392	0.10441
cbcl_scr_syn_external_r	smri_area_cdk_pc	-6.7128e-05	19700.6	-1.38237	0.166875
cbcl_scr_syn_external_r	smri_area_cdk_rracate	0.000115562	19682.3	1.00611	0.314375
cbcl_scr_syn_external_r	smri_area_cdk_rrmdfr	-4.67558e-05	19729	-0.817712	0.413531
cbcl_scr_syn_external_r	smri_area_cdk_sufr	-2.6902e-05	19727.7	-0.535932	0.592012
cbcl_scr_syn_external_r	smri_area_cdk_supl	-5.83433e-05	19730.5	-0.944926	0.344708
cbcl_scr_syn_external_r	smri_area_cdk_sutm	-5.25707e-05	19613.5	-1.09589	0.273139
cbcl_scr_syn_external_r	smri_area_cdk_sm	1.57557e-05	19684.3	0.174329	0.861609
cbcl_scr_syn_external_r	smri_area_cdk_frpole	3.83184e-05	19248.3	0.461992	0.644093
cbcl_scr_syn_external_r	smri_area_cdk_tmpole	-7.65765e-05	19284.3	-0.954942	0.339619
cbcl_scr_syn_external_r	smri_area_cdk_trvtm	2.37294e-06	19704.9	0.0305276	0.975647
cbcl_scr_syn_external_r	smri_area_cdk_insula	-0.000122542	16800.2	-2.2703	0.023202
cbcl_scr_syn_external_r	smri_thick_cdk_bankssts	1.35009e-05	19712.5	0.349449	0.726756
cbcl_scr_syn_external_r	smri_thick_cdk_cdacate	0.000128438	19700.2	2.66928	0.00760764
cbcl_scr_syn_external_r	smri_thick_cdk_cdmdfr	6.09759e-07	19481.2	0.023813	0.981002
cbcl_scr_syn_external_r	smri_thick_cdk_cuneus	1.37621e-05	19730.1	0.418845	0.675334
cbcl_scr_syn_external_r	smri_thick_cdk_ehinal	1.08207e-05	18642.8	0.193098	0.846884
cbcl_scr_syn_external_r	smri_thick_cdk_fusiform	-2.68618e-06	19730.2	-0.131049	0.895738
cbcl_scr_syn_external_r	smri_thick_cdk_ifpl	-3.13385e-05	19467.3	-1.53612	0.124525
cbcl_scr_syn_external_r	smri_thick_cdk_iftm	-2.59884e-05	19623.7	-1.08476	0.27804
cbcl_scr_syn_external_r	smri_thick_cdk_ihcate	3.22641e-06	19713.4	0.0900857	0.92822
cbcl_scr_syn_external_r	smri_thick_cdk_locc	7.39286e-06	19729.2	0.347737	0.728041
cbcl_scr_syn_external_r	smri_thick_cdk_lobfr	-1.58431e-05	18510.6	-0.629899	0.528768
cbcl_scr_syn_external_r	smri_thick_cdk_lingual	-3.36433e-05	19725.9	-1.28641	0.198313
cbcl_scr_syn_external_r	smri_thick_cdk_mobfr	-1.38895e-05	18976.6	-0.441329	0.65898
cbcl_scr_syn_external_r	smri_thick_cdk_mdtm	-6.0226e-05	19433.2	-2.36617	0.0179828
cbcl_scr_syn_external_r	smri_thick_cdk_parahpal	-1.03733e-05	19727.8	-0.243155	0.807888
cbcl_scr_syn_external_r	smri_thick_cdk_paracn	4.19508e-07	19652.2	0.0161727	0.987097
cbcl_scr_syn_external_r	smri_thick_cdk_parsopc	9.41812e-06	19542	0.341217	0.732944
cbcl_scr_syn_external_r	smri_thick_cdk_parsobis	2.25037e-05	19559	0.608602	0.542795
cbcl_scr_syn_external_r	smri_thick_cdk_parstgris	-1.88299e-05	19340	-0.645749	0.518449
cbcl_scr_syn_external_r	smri_thick_cdk_pericc	4.85717e-05	19696.5	1.19413	0.23244
cbcl_scr_syn_external_r	smri_thick_cdk_postcn	-1.69012e-05	19353.9	-0.606072	0.544474
cbcl_scr_syn_external_r	smri_thick_cdk_ptcate	8.98456e-05	19730.9	2.93907	0.00329576
cbcl_scr_syn_external_r	smri_thick_cdk_precn	1.02517e-05	18934.7	0.386131	0.699404
cbcl_scr_syn_external_r	smri_thick_cdk_pc	-7.27017e-07	19643.2	-0.0410278	0.967274
cbcl_scr_syn_external_r	smri_thick_cdk_rracate	7.40999e-05	19610.8	1.65777	0.0973791
cbcl_scr_syn_external_r	smri_thick_cdk_rrmdfr	4.9146e-06	19466	0.231156	0.817196
cbcl_scr_syn_external_r	smri_thick_cdk_sufr	1.24041e-05	19616	0.798856	0.424384
cbcl_scr_syn_external_r	smri_thick_cdk_supl	3.73748e-06	19482.7	0.214473	0.83018
cbcl_scr_syn_external_r	smri_thick_cdk_sutm	-4.17379e-06	19695.7	-0.19243	0.847407
cbcl_scr_syn_external_r	smri_thick_cdk_sm	-6.25996e-05	19193.3	-2.45362	0.0141514
cbcl_scr_syn_external_r	smri_thick_cdk_frpole	2.32095e-05	19416.7	0.413392	0.679324
cbcl_scr_syn_external_r	smri_thick_cdk_tmpole	-6.21281e-05	18445.5	-1.25378	0.209939
cbcl_scr_syn_external_r	smri_thick_cdk_trvtm	1.96491e-05	19699.9	0.468209	0.63964
cbcl_scr_syn_external_r	smri_thick_cdk_insula	6.64291e-07	18457.3	0.0230702	0.981595
cbcl_scr_syn_external_r	smri_vol_scs_cbwmatter	1.28744e-05	18198.7	1.25428	0.209755
cbcl_scr_syn_external_r	smri_vol_scs_ltventricle	0.000199837	19383.2	1.38196	0.167001
cbcl_scr_syn_external_r	smri_vol_scs_inflatvent	-0.000477543	19724.4	-1.90403	0.0569212
cbcl_scr_syn_external_r	smri_vol_scs_crbwmatter	5.51757e-05	16480.4	1.16453	0.244226
cbcl_scr_syn_external_r	smri_vol_scs_crbcortex	1.55325e-05	19518.7	0.839186	0.401375
cbcl_scr_syn_external_r	smri_vol_scs_tp	-8.74412e-05	18145.3	-2.57509	0.0100293
cbcl_scr_syn_external_r	smri_vol_scs_caudate	-4.92268e-05	19594.7	-1.76174	0.0781296
cbcl_scr_syn_external_r	smri_vol_scs_putamen	3.29406e-06	17928	0.110404	0.91209
cbcl_scr_syn_external_r	smri_vol_scs_pallidum	4.27285e-05	17308.1	0.688563	0.491107
cbcl_scr_syn_external_r	smri_vol_scs_hpus	-3.79472e-05	19495.2	-1.09981	0.27143
cbcl_scr_syn_external_r	smri_vol_scs_amygdala	5.4508e-05	19245.4	0.935898	0.349338
cbcl_scr_syn_external_r	smri_vol_scs_vedc	-2.02259e-05	16617.4	-0.780609	0.435044
cbcl_scr_syn_totprob_r	smri_area_cdk_bankssts	-2.25204e-06	19722.9	-0.0672313	0.946398
cbcl_scr_syn_totprob_r	smri_area_cdk_cdacate	4.43448e-05	19718	0.84505	0.398093
cbcl_scr_syn_totprob_r	smri_area_cdk_cdmdfr	4.24081e-05	19630.1	1.30022	0.193541
cbcl_scr_syn_totprob_r	smri_area_cdk_cuneus	-5.63443e-06	19728.2	-0.281678	0.778193
cbcl_scr_syn_totprob_r	smri_area_cdk_ehinal	5.18972e-05	18930.4	1.25305	0.210204
cbcl_scr_syn_totprob_r	smri_area_cdk_fusiform	1.06172e-05	19729.1	0.597662	0.550073
cbcl_scr_syn_totprob_r	smri_area_cdk_ifpl	1.37006e-05	19725.3	0.577909	0.563332
cbcl_scr_syn_totprob_r	smri_area_cdk_iftm	2.36158e-05	19710.3	1.14684	0.251463
cbcl_scr_syn_totprob_r	smri_area_cdk_ihcate	-6.22745e-05	19528.3	-2.3045	0.0212052
cbcl_scr_syn_totprob_r	smri_area_cdk_locc	-2.78401e-06	19712.6	-0.152614	0.878704
cbcl_scr_syn_totprob_r	smri_area_cdk_lobfr	5.75835e-05	18932.1	3.5666	0.00036253
cbcl_scr_syn_totprob_r	smri_area_cdk_lingual	6.53334e-06	19730	0.367898	0.712953
cbcl_scr_syn_totprob_r	smri_area_cdk_mobfr	1.42246e-05	18567.6	0.702853	0.482156
cbcl_scr_syn_totprob_r	smri_area_cdk_mdtm	4.08981e-05	19718.3	2.50312	0.0123183
cbcl_scr_syn_totprob_r	smri_area_cdk_parahpal	1.27589e-05	19154.1	0.499901	0.617151
cbcl_scr_syn_totprob_r	smri_area_cdk_paracn	1.56892e-05	19698	0.645745	0.518452
cbcl_scr_syn_totprob_r	smri_area_cdk_parsopc	-3.9182e-05	19730	-1.23989	0.21503
cbcl_scr_syn_totprob_r	smri_area_cdk_parsobis	1.14776e-05	19642.4	0.520902	0.602441
cbcl_scr_syn_totprob_r	smri_area_cdk_parstgris	-3.36426e-05	19702.3	-1.11189	0.266197
cbcl_scr_syn_totprob_r	smri_area_cdk_pericc	-2.18164e-07	19684	-0.0112308	0.991039
cbcl_scr_syn_totprob_r	smri_area_cdk_postcn	8.5299e-08	19590.9	0.00434761	0.996531
cbcl_scr_syn_totprob_r	smri_area_cdk_ptcate	-3.4944e-05	19721.3	-1.18118	0.237544
cbcl_scr_syn_totprob_r	smri_area_cdk_precn	1.18832e-05	19393.2	0.684133	0.493899
cbcl_scr_syn_totprob_r	smri_area_cdk_pc	-2.62718e-05	19658.7	-1.62236	0.104742
cbcl_scr_syn_totprob_r	smri_area_cdk_rracate	2.87494e-05	19681.4	0.750148	0.453174
cbcl_scr_syn_totprob_r	smri_area_cdk_rrmdfr	-5.01511e-06	19568.9	-0.263417	0.792232
cbcl_scr_syn_totprob_r	smri_area_cdk_sufr	5.91645e-06	19580.2	0.353935	0.723392
cbcl_scr_syn_totprob_r	smri_area_cdk_supl	-1.21982e-05	19509.5	-0.593812	0.552645
cbcl_scr_syn_totprob_r	smri_area_cdk_sutm	-5.19596e-06	19721.7	-0.324136	0.745838
cbcl_scr_syn_totprob_r	smri_area_cdk_sm	1.89006e-07	19678.8	0.00626798	0.994999
cbcl_scr_syn_totprob_r	smri_area_cdk_frpole	3.0168e-05	18510.1	1.102	0.270476
cbcl_scr_syn_totprob_r	smri_area_cdk_tmpole	-1.99122e-05	18571.4	-0.752121	0.451988
cbcl_scr_syn_totprob_r	smri_area_cdk_trvtm	1.31936e-05	19653.3	0.509054	0.61072
cbcl_scr_syn_totprob_r	smri_area_cdk_insula	-1.10934e-05	15784	-0.630624	0.528295
cbcl_scr_syn_totprob_r	smri_thick_cdk_bankssts	-7.62655e-06	19633.1	-0.59223	0.553704
cbcl_scr_syn_totprob_r	smri_thick_cdk_cdacate	3.66991e-05	19657.1	2.28701	0.0222058
cbcl_scr_syn_totprob_r	smri_thick_cdk_cdmdfr	-2.48631e-06	18861.9	-0.29347	0.769166
cbcl_scr_syn_totprob_r	smri_thick_cdk_cuneus	5.79409e-06	19558.4	0.529703	0.596324
cbcl_scr_syn_totprob_r	smri_thick_cdk_ehinal	-2.58569e-05	17708.1	-1.40375	0.16041
cbcl_scr_syn_totprob_r	smri_thick_cdk_fusiform	-7.66239e-06	19506.2	-1.12371	0.261148
cbcl_scr_syn_totprob_r	smri_thick_cdk_ifpl	-1.71093e-05	18837.5	-2.53542	0.0112393
cbcl_scr_syn_totprob_r	smri_thick_cdk_iftm	-8.03578e-06	19145.3	-1.01178	0.311656
cbcl_scr_syn_totprob_r	smri_thick_cdk_ihcate	6.73607e-06	19403.1	0.566062	0.571358
cbcl_scr_syn_totprob_r	smri_thick_cdk_locc	-4.15228e-06	19567.5	-0.586603	0.557477
cbcl_scr_syn_totprob_r	smri_thick_cdk_lobfr	-1.18612e-05	17547.8	-1.43569	0.15111
cbcl_scr_syn_totprob_r	smri_thick_cdk_lingual	-1.6401e-05	19462.1	-1.88614	0.0592911
cbcl_scr_syn_totprob_r	smri_thick_cdk_mobfr	-7.06908e-06	18133.4	-0.681923	0.495296
cbcl_scr_syn_totprob_r	smri_thick_cdk_mdtm	-1.83947e-05	18789.1	-2.18558	0.0288585
cbcl_scr_syn_totprob_r	smri_thick_cdk_parahpal	-1.25269e-05	19581.5	-0.881773	0.37791
cbcl_scr_syn_totprob_r	smri_thick_cdk_paracn	9.41814e-06	19212.2	1.09464	0.273687
cbcl_scr_syn_totprob_r	smri_thick_cdk_parsopc	-3.90709e-06	18986.6	-0.427543	0.668988
cbcl_scr_syn_totprob_r	smri_thick_cdk_parsobis	9.15425e-06	19016.2	0.747576	0.454725
cbcl_scr_syn_totprob_r	smri_thick_cdk_parstgris	-7.05765e-06	18642.9	-0.732659	0.463776
cbcl_scr_syn_totprob_r	smri_thick_cdk_pericc	5.3962e-06	19336.6	0.399502	0.689528
cbcl_scr_syn_totprob_r	smri_thick_cdk_postcn	-6.16474e-06	18652.5	-0.669044	0.503476
cbcl_scr_syn_totprob_r	smri_thick_cdk_ptcate	3.06794e-05	19528.7	3.01605	0.00256421
cbcl_scr_syn_totprob_r	smri_thick_cdk_precn	-1.65295e-06	18064.1	-0.189041	0.850063
cbcl_scr_syn_totprob_r	smri_thick_cdk_pc	1.32792e-06	19192.6	0.225971	0.821227
cbcl_scr_syn_totprob_r	smri_thick_cdk_rracate	1.08489e-05	19119.3	0.732271	0.464012
cbcl_scr_syn_totprob_r	smri_thick_cdk_rrmdfr	4.70092e-06	18849.4	0.668465	0.503845
cbcl_scr_syn_totprob_r	smri_thick_cdk_sufr	3.80286e-06	19129.8	0.738882	0.459988
cbcl_scr_syn_totprob_r	smri_thick_cdk_supl	-1.54409e-06	18870.8	-0.26781	0.788848
cbcl_scr_syn_totprob_r	smri_thick_cdk_sutm	-3.02153e-06	19332.1	-0.419523	0.674839
cbcl_scr_syn_totprob_r	smri_thick_cdk_sm	-1.98936e-05	18402.7	-2.36281	0.0181472
cbcl_scr_syn_totprob_r	smri_thick_cdk_frpole	3.02465e-05	18752.5	1.62959	0.103204
cbcl_scr_syn_totprob_r	smri_thick_cdk_tmpole	-2.90821e-05	17467.4	-1.78733	0.0739015
cbcl_scr_syn_totprob_r	smri_thick_cdk_trvtm	5.19729e-06	19347	0.372911	0.709219
cbcl_scr_syn_totprob_r	smri_thick_cdk_insula	-2.74953e-06	17497.6	-0.290816	0.771195
cbcl_scr_syn_totprob_r	smri_vol_scs_cbwmatter	5.51766e-06	17224	1.63978	0.101069
cbcl_scr_syn_totprob_r	smri_vol_scs_ltventricle	5.78139e-05	19703.6	1.19275	0.232983
cbcl_scr_syn_totprob_r	smri_vol_scs_inflatvent	-0.000270866	19459	-3.24896	0.00116026
cbcl_scr_syn_totprob_r	smri_vol_scs_crbwmatter	2.00468e-05	15424.7	1.29909	0.193932
cbcl_scr_syn_totprob_r	smri_vol_scs_crbcortex	6.52857e-06	18922.7	1.06554	0.286646
cbcl_scr_syn_totprob_r	smri_vol_scs_tp	-3.16427e-05	17178.9	-2.84388	0.00446209
cbcl_scr_syn_totprob_r	smri_vol_scs_caudate	-9.80173e-06	19079.7	-1.05858	0.289804
cbcl_scr_syn_totprob_r	smri_vol_scs_putamen	-6.12711e-07	16911.8	-0.0627125	0.949996
cbcl_scr_syn_totprob_r	smri_vol_scs_pallidum	1.57435e-05	16264.8	0.776863	0.437251
cbcl_scr_syn_totprob_r	smri_vol_scs_hpus	-5.86935e-06	18898.9	-0.514087	0.607197
cbcl_scr_syn_totprob_r	smri_vol_scs_amygdala	1.21482e-05	18514.5	0.631997	0.527396
cbcl_scr_syn_totprob_r	smri_vol_scs_vedc	-9.6885e-06	15567.4	-1.14776	0.251086
ksads_p_dep	smri_area_cdk_bankssts	0.00244483	14680	1.18189	0.23727
ksads_p_dep	smri_area_cdk_cdacate	0.00302771	14640.5	0.9706	0.331763
ksads_p_dep	smri_area_cdk_cdmdfr	0.00100056	15487.4	0.49137	0.623172
ksads_p_dep	smri_area_cdk_cuneus	0.00161336	14955.9	1.30789	0.190929
ksads_p_dep	smri_area_cdk_ehinal	-0.00188692	16430.9	-0.720296	0.471353
ksads_p_dep	smri_area_cdk_fusiform	-0.000300347	14795	-0.273381	0.784564
ksads_p_dep	smri_area_cdk_ifpl	-0.00262807	14654.2	-1.80394	0.0712618
ksads_p_dep	smri_area_cdk_iftm	0.000387238	15120.2	0.304201	0.760979
ksads_p_dep	smri_area_cdk_ihcate	-0.00100269	15682.2	-0.59567	0.551405
ksads_p_dep	smri_area_cdk_locc	2.76664e-05	14623.1	0.024585	0.980386
ksads_p_dep	smri_area_cdk_lobfr	0.00109802	16344.5	1.07787	0.281107
ksads_p_dep	smri_area_cdk_lingual	0.00071862	14861.9	0.657249	0.511031
ksads_p_dep	smri_area_cdk_mobfr	-0.000722841	16752	-0.559403	0.575894
ksads_p_dep	smri_area_cdk_mdtm	-0.000559393	14940.2	-0.55653	0.577857
ksads_p_dep	smri_area_cdk_parahpal	0.00148107	16065.2	0.93873	0.347884
ksads_p_dep	smri_area_cdk_paracn	-0.000472941	15252.4	-0.311416	0.755488
ksads_p_dep	smri_area_cdk_parsopc	-0.00140987	14863.1	-0.718069	0.472726
ksads_p_dep	smri_area_cdk_parsobis	-0.000380769	15334.2	-0.277923	0.781075
ksads_p_dep	smri_area_cdk_parstgris	-8.14437e-05	15128.9	-0.0435928	0.96523
ksads_p_dep	smri_area_cdk_pericc	-0.000228762	15206.4	-0.190676	0.848782
ksads_p_dep	smri_area_cdk_postcn	-0.000511373	15463.6	-0.417066	0.676636
ksads_p_dep	smri_area_cdk_ptcate	-0.00136842	14710.7	-0.75204	0.452039
ksads_p_dep	smri_area_cdk_precn	0.00101381	15818.5	0.931624	0.351545
ksads_p_dep	smri_area_cdk_pc	-0.000459607	15393.3	-0.453088	0.650492
ksads_p_dep	smri_area_cdk_rracate	0.00154137	15151.3	0.654168	0.513013
ksads_p_dep	smri_area_cdk_rrmdfr	-0.00117691	15339.9	-1.00027	0.317195
ksads_p_dep	smri_area_cdk_sufr	0.00159748	15515.7	1.53139	0.125694
ksads_p_dep	smri_area_cdk_supl	-0.00106762	15684	-0.826411	0.408584
ksads_p_dep	smri_area_cdk_sutm	-0.000537533	15096.7	-0.54102	0.588502
ksads_p_dep	smri_area_cdk_sm	0.00198323	15266.7	1.0531	0.292313
ksads_p_dep	smri_area_cdk_frpole	-0.000417217	16792.7	-0.238686	0.811352
ksads_p_dep	smri_area_cdk_tmpole	-0.00049713	16799	-0.293464	0.769171
ksads_p_dep	smri_area_cdk_trvtm	-0.000676053	15334.9	-0.422223	0.672868
ksads_p_dep	smri_area_cdk_insula	-0.000479564	17736.8	-0.413992	0.678885
ksads_p_dep	smri_thick_cdk_bankssts	-0.000709108	15365	-0.88092	0.378375
ksads_p_dep	smri_thick_cdk_cdacate	0.00182293	15239.3	1.83268	0.0668699
ksads_p_dep	smri_thick_cdk_cdmdfr	-0.000694241	16480.3	-1.28482	0.198872
ksads_p_dep	smri_thick_cdk_cuneus	0.000782774	15548.2	1.14493	0.252257
ksads_p_dep	smri_thick_cdk_ehinal	-0.00210115	17281.2	-1.74649	0.0807434
ksads_p_dep	smri_thick_cdk_fusiform	-0.000235211	15672.7	-0.550039	0.582301
ksads_p_dep	smri_thick_cdk_ifpl	-0.000854761	16454.6	-1.9804	0.0476751
ksads_p_dep	smri_thick_cdk_iftm	-0.000561813	16135.6	-1.12103	0.262291
ksads_p_dep	smri_thick_cdk_ihcate	4.53955e-05	15905.1	0.0606153	0.951666
ksads_p_dep	smri_thick_cdk_locc	-0.000125065	15467.8	-0.28396	0.776445
ksads_p_dep	smri_thick_cdk_lobfr	-0.000289449	17287.5	-0.53712	0.591192
ksads_p_dep	smri_thick_cdk_lingual	-0.000125064	15734.6	-0.229867	0.818198
ksads_p_dep	smri_thick_cdk_mobfr	-0.000216001	17012.5	-0.321675	0.747703
ksads_p_dep	smri_thick_cdk_mdtm	-0.000963382	16492.4	-1.79272	0.0730363
ksads_p_dep	smri_thick_cdk_parahpal	0.000272986	15485.7	0.310297	0.75634
ksads_p_dep	smri_thick_cdk_paracn	-0.000301036	16098.1	-0.553441	0.579969
ksads_p_dep	smri_thick_cdk_parsopc	-0.000326411	16396.5	-0.561139	0.57471
ksads_p_dep	smri_thick_cdk_parsobis	0.000934602	16335.1	1.20517	0.228155
ksads_p_dep	smri_thick_cdk_parstgris	0.000103119	16647	0.168026	0.866565
ksads_p_dep	smri_thick_cdk_pericc	0.000729698	15936.3	0.863219	0.38803
ksads_p_dep	smri_thick_cdk_postcn	0.00132147	16633.4	2.23579	0.0253786
ksads_p_dep	smri_thick_cdk_ptcate	0.000317257	15690	0.497761	0.618659
ksads_p_dep	smri_thick_cdk_precn	-0.000668529	16745.2	-1.199	0.230543
ksads_p_dep	smri_thick_cdk_pc	-0.000122385	16161.3	-0.328569	0.742486
ksads_p_dep	smri_thick_cdk_rracate	0.000412081	16214.5	0.439441	0.660348
ksads_p_dep	smri_thick_cdk_rrmdfr	-9.3871e-05	16458.7	-0.210633	0.833177
ksads_p_dep	smri_thick_cdk_sufr	-0.000583095	16181.4	-1.79257	0.0730605
ksads_p_dep	smri_thick_cdk_supl	0.000190507	16438.4	0.51936	0.603517
ksads_p_dep	smri_thick_cdk_sutm	3.97387e-05	15914.1	0.0875505	0.930235
ksads_p_dep	smri_thick_cdk_sm	-0.00109753	16669.8	-2.02571	0.0428109
ksads_p_dep	smri_thick_cdk_frpole	0.0013048	16559	1.09405	0.27395
ksads_p_dep	smri_thick_cdk_tmpole	-0.0006904	17391.4	-0.648614	0.516596
ksads_p_dep	smri_thick_cdk_trvtm	0.000474133	15912.3	0.539681	0.589425
ksads_p_dep	smri_thick_cdk_insula	0.000464962	17365.1	0.752966	0.451481
ksads_p_dep	smri_vol_scs_cbwmatter	0.00028484	17712.4	1.26158	0.207118
ksads_p_dep	smri_vol_scs_ltventricle	-0.000372751	14573.4	-0.126939	0.898991
ksads_p_dep	smri_vol_scs_inflatvent	0.00639663	15808.9	1.22928	0.218985
ksads_p_dep	smri_vol_scs_crbwmatter	0.00164821	17746.6	1.59877	0.10989
ksads_p_dep	smri_vol_scs_crbcortex	8.54723e-06	15808.5	0.0220118	0.982439
ksads_p_dep	smri_vol_scs_tp	0.000526474	17475.4	0.732672	0.463769
ksads_p_dep	smri_vol_scs_caudate	-0.000646821	16109.2	-1.11011	0.26697
ksads_p_dep	smri_vol_scs_putamen	-5.46418e-05	17577	-0.0854121	0.931935
ksads_p_dep	smri_vol_scs_pallidum	-0.000927486	17675.8	-0.681994	0.495251
ksads_p_dep	smri_vol_scs_hpus	-0.000107688	16484.3	-0.147825	0.882482
ksads_p_dep	smri_vol_scs_amygdala	0.000496205	16724.1	0.407218	0.683853
ksads_p_dep	smri_vol_scs_vedc	-0.00136566	17754.6	-2.39852	0.0164718
ksads_p_bp	smri_area_cdk_bankssts	0.00181704	15156.9	0.776621	0.437395
ksads_p_bp	smri_area_cdk_cdacate	0.000183364	15118.3	0.0519602	0.958561
ksads_p_bp	smri_area_cdk_cdmdfr	0.00166532	15897.2	0.724486	0.468778
ksads_p_bp	smri_area_cdk_cuneus	-0.00196229	15419.4	-1.40735	0.159345
ksads_p_bp	smri_area_cdk_ehinal	-0.000516141	16714.6	-0.174929	0.861138
ksads_p_bp	smri_area_cdk_fusiform	0.00125195	15265.1	1.00787	0.313531
ksads_p_bp	smri_area_cdk_ifpl	0.00195072	15132.1	1.18361	0.236588
ksads_p_bp	smri_area_cdk_iftm	-2.04799e-05	15565.4	-0.0142395	0.988639
ksads_p_bp	smri_area_cdk_ihcate	0.000666054	16070.7	0.350672	0.725839
ksads_p_bp	smri_area_cdk_locc	-0.000567559	15102.2	-0.445845	0.655715
ksads_p_bp	smri_area_cdk_lobfr	0.00103757	16643.4	0.904092	0.36596
ksads_p_bp	smri_area_cdk_lingual	-0.00147634	15328.9	-1.19439	0.232345
ksads_p_bp	smri_area_cdk_mobfr	-0.000669097	16978.2	-0.460075	0.645468
ksads_p_bp	smri_area_cdk_mdtm	0.000135137	15404.7	0.118952	0.905315
ksads_p_bp	smri_area_cdk_parahpal	0.00114497	16403.3	0.643714	0.51977
ksads_p_bp	smri_area_cdk_paracn	-0.000930419	15687	-0.542428	0.587532
ksads_p_bp	smri_area_cdk_parsopc	0.00162785	15331.1	0.733352	0.463355
ksads_p_bp	smri_area_cdk_parsobis	6.30605e-06	15762.2	0.00407632	0.996748
ksads_p_bp	smri_area_cdk_parstgris	-0.00191853	15571.9	-0.90893	0.363401
ksads_p_bp	smri_area_cdk_pericc	-0.000806123	15646.2	-0.594853	0.55195
ksads_p_bp	smri_area_cdk_postcn	0.00048196	15878.1	0.348221	0.727679
ksads_p_bp	smri_area_cdk_ptcate	-0.00387117	15181	-1.88108	0.0599803
ksads_p_bp	smri_area_cdk_precn	0.000429015	16192.5	0.349527	0.726698
ksads_p_bp	smri_area_cdk_pc	0.00178573	15813.1	1.5592	0.118969
ksads_p_bp	smri_area_cdk_rracate	-0.00617915	15593.7	-2.32171	0.0202613
ksads_p_bp	smri_area_cdk_rrmdfr	-0.00143855	15768.8	-1.08282	0.278903
ksads_p_bp	smri_area_cdk_sufr	3.86972e-05	15922.6	0.0328645	0.973783
ksads_p_bp	smri_area_cdk_supl	-2.77442e-05	16076.2	-0.0190342	0.984814
ksads_p_bp	smri_area_cdk_sutm	0.000514458	15543	0.45826	0.646772
ksads_p_bp	smri_area_cdk_sm	-0.000474751	15700.4	-0.223197	0.823385
ksads_p_bp	smri_area_cdk_frpole	0.00185166	17012.9	0.941321	0.346554
ksads_p_bp	smri_area_cdk_tmpole	0.00222574	17016.8	1.16751	0.24302
ksads_p_bp	smri_area_cdk_trvtm	-9.75113e-06	15759.9	-0.00539249	0.995698
ksads_p_bp	smri_area_cdk_insula	0.00121928	17740.9	0.937256	0.34864
ksads_p_bp	smri_thick_cdk_bankssts	-0.00114931	15789	-1.26458	0.20604
ksads_p_bp	smri_thick_cdk_cdacate	0.00148282	15678.4	1.31974	0.18694
ksads_p_bp	smri_thick_cdk_cdmdfr	2.46227e-05	16756.8	0.0404656	0.967722
ksads_p_bp	smri_thick_cdk_cuneus	0.000953319	15952.7	1.23553	0.21665
ksads_p_bp	smri_thick_cdk_ehinal	3.75805e-05	17397.6	0.0277852	0.977834
ksads_p_bp	smri_thick_cdk_fusiform	-0.000935227	16063.9	-1.93846	0.0525841
ksads_p_bp	smri_thick_cdk_ifpl	0.000258495	16736.5	0.53175	0.594906
ksads_p_bp	smri_thick_cdk_iftm	0.000477277	16468.4	0.845001	0.398123
ksads_p_bp	smri_thick_cdk_ihcate	0.0016413	16265.8	1.9436	0.0519613
ksads_p_bp	smri_thick_cdk_locc	0.000310088	15882.6	0.623719	0.532821
ksads_p_bp	smri_thick_cdk_lobfr	3.90671e-05	17402.9	0.0644898	0.948581
ksads_p_bp	smri_thick_cdk_lingual	0.00103826	16116.5	1.69194	0.0906761
ksads_p_bp	smri_thick_cdk_mobfr	-0.00103426	17188.2	-1.36942	0.170886
ksads_p_bp	smri_thick_cdk_mdtm	-0.00106628	16761.8	-1.76212	0.0780677
ksads_p_bp	smri_thick_cdk_parahpal	-0.00016219	15896.6	-0.16331	0.870277
ksads_p_bp	smri_thick_cdk_paracn	-0.000777267	16435.3	-1.26789	0.204856
ksads_p_bp	smri_thick_cdk_parsopc	-0.00056807	16686	-0.866991	0.385959
ksads_p_bp	smri_thick_cdk_parsobis	-7.23928e-05	16636.3	-0.0828591	0.933965
ksads_p_bp	smri_thick_cdk_parstgris	-0.000720064	16892.8	-1.04233	0.297275
ksads_p_bp	smri_thick_cdk_pericc	0.00141989	16297.1	1.48967	0.136331
ksads_p_bp	smri_thick_cdk_postcn	-0.000399976	16884.4	-0.601063	0.547806
ksads_p_bp	smri_thick_cdk_ptcate	0.0011969	16077.9	1.66445	0.0960418
ksads_p_bp	smri_thick_cdk_precn	0.000653414	16974.5	1.04135	0.297726
ksads_p_bp	smri_thick_cdk_pc	-0.000268685	16488.5	-0.640052	0.522148
ksads_p_bp	smri_thick_cdk_rracate	-0.000575913	16532.3	-0.545015	0.58575
ksads_p_bp	smri_thick_cdk_rrmdfr	0.00033361	16738.8	0.664661	0.506276
ksads_p_bp	smri_thick_cdk_sufr	0.000565683	16505.3	1.54311	0.122824
ksads_p_bp	smri_thick_cdk_supl	0.000269056	16722.7	0.651262	0.514886
ksads_p_bp	smri_thick_cdk_sutm	-0.000863786	16272.6	-1.68804	0.0914232
ksads_p_bp	smri_thick_cdk_sm	6.38415e-05	16913.8	0.104676	0.916634
ksads_p_bp	smri_thick_cdk_frpole	-0.000610003	16821	-0.454276	0.649636
ksads_p_bp	smri_thick_cdk_tmpole	-0.00209903	17483.5	-1.75475	0.0793193
ksads_p_bp	smri_thick_cdk_trvtm	5.06616e-05	16273.2	0.0511367	0.959217
ksads_p_bp	smri_thick_cdk_insula	-0.000504247	17462.4	-0.726533	0.467522
ksads_p_bp	smri_vol_scs_cbwmatter	-2.85582e-05	17723	-0.112616	0.910336
ksads_p_bp	smri_vol_scs_ltventricle	-0.00262332	15051.4	-0.789515	0.429823
ksads_p_bp	smri_vol_scs_inflatvent	-0.0111632	16184.5	-1.90191	0.0572003
ksads_p_bp	smri_vol_scs_crbwmatter	0.000358391	17748.1	0.309533	0.75692
ksads_p_bp	smri_vol_scs_crbcortex	-0.000459616	16192.7	-1.0499	0.293779
ksads_p_bp	smri_vol_scs_tp	-6.44232e-05	17546.3	-0.0797842	0.93641
ksads_p_bp	smri_vol_scs_caudate	-0.000869516	16446	-1.32407	0.185499
ksads_p_bp	smri_vol_scs_putamen	-0.000784534	17622.1	-1.09164	0.275007
ksads_p_bp	smri_vol_scs_pallidum	0.0022123	17695.8	1.44837	0.147531
ksads_p_bp	smri_vol_scs_hpus	0.00146429	16757.9	1.78491	0.0742936
ksads_p_bp	smri_vol_scs_amygdala	-0.00117635	16955.2	-0.857708	0.391066
ksads_p_bp	smri_vol_scs_vedc	-0.000324597	17754.5	-0.507559	0.611769
ksads_p_sep	smri_area_cdk_bankssts	0.00315279	15961.3	1.84852	0.0645457
ksads_p_sep	smri_area_cdk_cdacate	-0.00332116	15920	-1.29046	0.19691
ksads_p_sep	smri_area_cdk_cdmdfr	-0.000282198	16684.4	-0.169023	0.86578
ksads_p_sep	smri_area_cdk_cuneus	0.000658019	16230.4	0.64817	0.516884
ksads_p_sep	smri_area_cdk_ehinal	-0.00113646	17380	-0.533296	0.593835
ksads_p_sep	smri_area_cdk_fusiform	-4.61179e-05	16076.8	-0.050948	0.959368
ksads_p_sep	smri_area_cdk_ifpl	0.00261406	15934	2.1751	0.0296374
ksads_p_sep	smri_area_cdk_iftm	0.00285472	16373.7	2.72827	0.00637346
ksads_p_sep	smri_area_cdk_ihcate	0.00123767	16841.5	0.898058	0.369167
ksads_p_sep	smri_area_cdk_locc	0.000209955	15907.5	0.226142	0.821094
ksads_p_sep	smri_area_cdk_lobfr	0.000947177	17327.9	1.14216	0.253403
ksads_p_sep	smri_area_cdk_lingual	0.000633855	16141.1	0.703958	0.481469
ksads_p_sep	smri_area_cdk_mobfr	0.000750976	17558	0.716633	0.47361
ksads_p_sep	smri_area_cdk_mdtm	0.00032688	16223.2	0.395175	0.692719
ksads_p_sep	smri_area_cdk_parahpal	-0.00127958	17127.5	-0.993534	0.320464
ksads_p_sep	smri_area_cdk_paracn	0.000420528	16489.8	0.337166	0.735996
ksads_p_sep	smri_area_cdk_parsopc	0.000127416	16142.4	0.0787976	0.937195
ksads_p_sep	smri_area_cdk_parsobis	-0.000740883	16569.8	-0.659008	0.5099
ksads_p_sep	smri_area_cdk_parstgris	-0.000448409	16375.2	-0.291949	0.770329
ksads_p_sep	smri_area_cdk_pericc	0.00111476	16454.7	1.13119	0.257993
ksads_p_sep	smri_area_cdk_postcn	-0.000947774	16674.2	-0.942871	0.34576
ksads_p_sep	smri_area_cdk_ptcate	-0.000382656	15976.8	-0.25497	0.798749
ksads_p_sep	smri_area_cdk_precn	-0.000330235	16960.4	-0.371157	0.710525
ksads_p_sep	smri_area_cdk_pc	9.73938e-05	16606.2	0.117017	0.906848
ksads_p_sep	smri_area_cdk_rracate	-0.00224026	16399.7	-1.1569	0.247332
ksads_p_sep	smri_area_cdk_rrmdfr	-0.000452411	16577.6	-0.468606	0.639357
ksads_p_sep	smri_area_cdk_sufr	0.000211648	16712.6	0.247529	0.804502
ksads_p_sep	smri_area_cdk_supl	-0.000335044	16859.1	-0.31687	0.751346
ksads_p_sep	smri_area_cdk_sutm	-0.000815754	16347.1	-0.998471	0.318066
ksads_p_sep	smri_area_cdk_sm	-0.000806455	16503	-0.521457	0.602055
ksads_p_sep	smri_area_cdk_frpole	0.00024033	17582.9	0.169632	0.865302
ksads_p_sep	smri_area_cdk_tmpole	-0.00169542	17578.3	-1.23459	0.217
ksads_p_sep	smri_area_cdk_trvtm	-0.00147608	16549.9	-1.1229	0.261497
ksads_p_sep	smri_area_cdk_insula	-0.000255885	17543.6	-0.277002	0.781782
ksads_p_sep	smri_thick_cdk_bankssts	-0.000207878	16590	-0.314738	0.752965
ksads_p_sep	smri_thick_cdk_cdacate	-0.00063428	16484.4	-0.77639	0.43753
ksads_p_sep	smri_thick_cdk_cdmdfr	0.00020846	17424	0.47465	0.635043
ksads_p_sep	smri_thick_cdk_cuneus	0.000862291	16747.1	1.53944	0.123716
ksads_p_sep	smri_thick_cdk_ehinal	-0.000697338	17746.6	-0.71924	0.472002
ksads_p_sep	smri_thick_cdk_fusiform	-0.000341468	16839.9	-0.975422	0.329365
ksads_p_sep	smri_thick_cdk_ifpl	-0.00056591	17407.5	-1.61265	0.106839
ksads_p_sep	smri_thick_cdk_iftm	0.000377865	17200.6	0.924745	0.355111
ksads_p_sep	smri_thick_cdk_ihcate	0.000210937	17016	0.344639	0.73037
ksads_p_sep	smri_thick_cdk_locc	-0.000347529	16679.2	-0.962506	0.335809
ksads_p_sep	smri_thick_cdk_lobfr	-0.000141818	17747.9	-0.326614	0.743964
ksads_p_sep	smri_thick_cdk_lingual	-0.000174914	16902.3	-0.393027	0.694305
ksads_p_sep	smri_thick_cdk_mobfr	-0.000176332	17676.3	-0.324777	0.745354
ksads_p_sep	smri_thick_cdk_mdtm	-0.00072259	17423.6	-1.65421	0.0981028
ksads_p_sep	smri_thick_cdk_parahpal	-0.000253045	16684.3	-0.350805	0.725739
ksads_p_sep	smri_thick_cdk_paracn	-0.000285331	17173.8	-0.643194	0.520107
ksads_p_sep	smri_thick_cdk_parsopc	-0.000252921	17359.2	-0.534326	0.593123
ksads_p_sep	smri_thick_cdk_parsobis	0.000445085	17324.4	0.704966	0.480841
ksads_p_sep	smri_thick_cdk_parstgris	9.70462e-05	17511.3	0.194826	0.845531
ksads_p_sep	smri_thick_cdk_pericc	-0.000580093	17051	-0.840161	0.40083
ksads_p_sep	smri_thick_cdk_postcn	-0.000483254	17510.6	-1.00729	0.31381
ksads_p_sep	smri_thick_cdk_ptcate	0.000111715	16849.1	0.2141	0.830471
ksads_p_sep	smri_thick_cdk_precn	0.000365533	17573.6	0.80884	0.418618
ksads_p_sep	smri_thick_cdk_pc	-0.000189799	17207.8	-0.624954	0.53201
ksads_p_sep	smri_thick_cdk_rracate	1.35487e-06	17244.1	0.00177282	0.998586
ksads_p_sep	smri_thick_cdk_rrmdfr	-0.000266342	17399.3	-0.734894	0.462414
ksads_p_sep	smri_thick_cdk_sufr	0.000144305	17223.3	0.544165	0.586335
ksads_p_sep	smri_thick_cdk_supl	-6.98237e-06	17392.4	-0.0234061	0.981327
ksads_p_sep	smri_thick_cdk_sutm	3.13745e-05	17042.9	0.0846286	0.932558
ksads_p_sep	smri_thick_cdk_sm	0.000203938	17536.6	0.46401	0.642646
ksads_p_sep	smri_thick_cdk_frpole	0.00056667	17466	0.584962	0.558581
ksads_p_sep	smri_thick_cdk_tmpole	-0.00182731	17756	-2.13435	0.0328277
ksads_p_sep	smri_thick_cdk_trvtm	0.00196976	17026.8	2.74464	0.00606403
ksads_p_sep	smri_thick_cdk_insula	-7.12976e-05	17755.1	-0.143451	0.885936
ksads_p_sep	smri_vol_scs_cbwmatter	-0.00023009	17599.4	-1.27626	0.201879
ksads_p_sep	smri_vol_scs_ltventricle	-0.000602473	15839.2	-0.248488	0.80376
ksads_p_sep	smri_vol_scs_inflatvent	-0.00478879	16944.7	-1.12521	0.260514
ksads_p_sep	smri_vol_scs_crbwmatter	0.001414	17493.8	1.72137	0.0852017
ksads_p_sep	smri_vol_scs_crbcortex	4.35283e-05	17013.1	0.137289	0.890804
ksads_p_sep	smri_vol_scs_tp	-0.000216016	17752.4	-0.374127	0.708314
ksads_p_sep	smri_vol_scs_caudate	-0.000237802	17183.6	-0.500457	0.61676
ksads_p_sep	smri_vol_scs_putamen	0.000958725	17722.9	1.86941	0.0615829
ksads_p_sep	smri_vol_scs_pallidum	-0.00263752	17661.3	-2.42548	0.0152981
ksads_p_sep	smri_vol_scs_hpus	-5.10714e-05	17405.4	-0.0862047	0.931305
ksads_p_sep	smri_vol_scs_amygdala	0.00062379	17544.8	0.631045	0.528019
ksads_p_sep	smri_vol_scs_vedc	-0.000848635	17433.8	-1.87248	0.0611571
ksads_p_sad	smri_area_cdk_bankssts	0.00110854	15135.2	0.481258	0.63034
ksads_p_sad	smri_area_cdk_cdacate	0.00028069	15092	0.0807906	0.93561
ksads_p_sad	smri_area_cdk_cdmdfr	0.00294337	15958.2	1.30071	0.193378
ksads_p_sad	smri_area_cdk_cuneus	-0.00129422	15425.6	-0.942809	0.345793
ksads_p_sad	smri_area_cdk_ehinal	0.00032252	16869.6	0.111119	0.911523
ksads_p_sad	smri_area_cdk_fusiform	-1.31265e-05	15256.5	-0.010733	0.991437
ksads_p_sad	smri_area_cdk_ifpl	-0.000362563	15107.3	-0.223436	0.823199
ksads_p_sad	smri_area_cdk_iftm	-0.00141745	15587.3	-1.00107	0.31681
ksads_p_sad	smri_area_cdk_ihcate	0.000430439	16147.1	0.230227	0.817919
ksads_p_sad	smri_area_cdk_locc	0.000754862	15075.6	0.602312	0.546976
ksads_p_sad	smri_area_cdk_lobfr	-0.000802261	16789.2	-0.710601	0.477341
ksads_p_sad	smri_area_cdk_lingual	-0.00157426	15325.5	-1.29368	0.195796
ksads_p_sad	smri_area_cdk_mobfr	0.000350155	17155.9	0.244884	0.806549
ksads_p_sad	smri_area_cdk_mdtm	0.00277012	15410.7	2.4772	0.0132525
ksads_p_sad	smri_area_cdk_parahpal	0.00139971	16520	0.79962	0.423942
ksads_p_sad	smri_area_cdk_paracn	-0.00373352	15722.1	-2.21126	0.0270325
ksads_p_sad	smri_area_cdk_parsopc	-0.00239285	15329.1	-1.09493	0.273563
ksads_p_sad	smri_area_cdk_parsobis	-0.00134837	15810.9	-0.885368	0.375971
ksads_p_sad	smri_area_cdk_parstgris	0.000324039	15594.6	0.155924	0.876095
ksads_p_sad	smri_area_cdk_pericc	-0.000322734	15679.1	-0.241902	0.80886
ksads_p_sad	smri_area_cdk_postcn	-0.000934804	15939.1	-0.686069	0.492679
ksads_p_sad	smri_area_cdk_ptcate	-0.00282298	15158.9	-1.39324	0.163566
ksads_p_sad	smri_area_cdk_precn	-0.00157868	16288.6	-1.30686	0.191279
ksads_p_sad	smri_area_cdk_pc	0.00303968	15858	2.69653	0.00701402
ksads_p_sad	smri_area_cdk_rracate	-0.00351187	15619.1	-1.34014	0.180219
ksads_p_sad	smri_area_cdk_rrmdfr	0.000623065	15817.8	0.476384	0.633807
ksads_p_sad	smri_area_cdk_sufr	0.00120133	15986.2	1.03643	0.300016
ksads_p_sad	smri_area_cdk_supl	-0.000486457	16161.3	-0.339051	0.734576
ksads_p_sad	smri_area_cdk_sutm	0.000973193	15560.9	0.88053	0.378586
ksads_p_sad	smri_area_cdk_sm	0.000858748	15737	0.410092	0.681744
ksads_p_sad	smri_area_cdk_frpole	0.00289236	17196.6	1.49574	0.134739
ksads_p_sad	smri_area_cdk_tmpole	-0.000123966	17193.7	-0.0661415	0.947266
ksads_p_sad	smri_area_cdk_trvtm	0.00140374	15799.7	0.788538	0.430394
ksads_p_sad	smri_area_cdk_insula	-0.00101674	17722.6	-0.79951	0.424005
ksads_p_sad	smri_thick_cdk_bankssts	-0.00103416	15837.2	-1.15584	0.247765
ksads_p_sad	smri_thick_cdk_cdacate	-0.000792394	15713.9	-0.716353	0.473784
ksads_p_sad	smri_thick_cdk_cdmdfr	0.000703317	16925.4	1.17521	0.239929
ksads_p_sad	smri_thick_cdk_cuneus	0.00139214	16025.2	1.83289	0.0668381
ksads_p_sad	smri_thick_cdk_ehinal	-0.00187387	17578.2	-1.41143	0.158137
ksads_p_sad	smri_thick_cdk_fusiform	-0.000149925	16143.6	-0.315662	0.752263
ksads_p_sad	smri_thick_cdk_ifpl	-0.000611079	16901.4	-1.27806	0.201247
ksads_p_sad	smri_thick_cdk_iftm	-0.000528218	16603.2	-0.950417	0.341914
ksads_p_sad	smri_thick_cdk_ihcate	0.00103852	16368.4	1.24941	0.211532
ksads_p_sad	smri_thick_cdk_locc	-0.000162128	15943.5	-0.331262	0.740451
ksads_p_sad	smri_thick_cdk_lobfr	-0.000132735	17582.8	-0.22322	0.823367
ksads_p_sad	smri_thick_cdk_lingual	-0.000328706	16212.9	-0.544129	0.58636
ksads_p_sad	smri_thick_cdk_mobfr	-0.000198874	17378.5	-0.267987	0.788713
ksads_p_sad	smri_thick_cdk_mdtm	-0.000234626	16929.8	-0.39416	0.693468
ksads_p_sad	smri_thick_cdk_parahpal	0.000265985	15956.3	0.272057	0.785582
ksads_p_sad	smri_thick_cdk_paracn	0.000603215	16566.2	0.999937	0.317356
ksads_p_sad	smri_thick_cdk_parsopc	-0.00051312	16836.8	-0.796081	0.425996
ksads_p_sad	smri_thick_cdk_parsobis	-0.000378941	16785	-0.440872	0.659311
ksads_p_sad	smri_thick_cdk_parstgris	-0.000317966	17069.4	-0.468057	0.63975
ksads_p_sad	smri_thick_cdk_pericc	-0.000326143	16406.4	-0.34767	0.728093
ksads_p_sad	smri_thick_cdk_postcn	-0.000348064	17062.6	-0.531936	0.594777
ksads_p_sad	smri_thick_cdk_ptcate	0.0007634	16158.7	1.07838	0.28088
ksads_p_sad	smri_thick_cdk_precn	-0.000475478	17165.5	-0.770831	0.440818
ksads_p_sad	smri_thick_cdk_pc	-0.00017687	16619.7	-0.42819	0.668519
ksads_p_sad	smri_thick_cdk_rracate	-0.000697532	16670.8	-0.670877	0.502308
ksads_p_sad	smri_thick_cdk_rrmdfr	-0.000258417	16896.3	-0.52342	0.600689
ksads_p_sad	smri_thick_cdk_sufr	0.000173222	16640	0.4802	0.631091
ksads_p_sad	smri_thick_cdk_supl	0.000252249	16882.9	0.620736	0.534782
ksads_p_sad	smri_thick_cdk_sutm	0.000261666	16390.7	0.519495	0.603423
ksads_p_sad	smri_thick_cdk_sm	-0.000278357	17101.9	-0.464197	0.642513
ksads_p_sad	smri_thick_cdk_frpole	0.000746756	16993.5	0.565472	0.57176
ksads_p_sad	smri_thick_cdk_tmpole	-0.00168926	17651.4	-1.43939	0.150059
ksads_p_sad	smri_thick_cdk_trvtm	0.00108855	16380.3	1.11641	0.264265
ksads_p_sad	smri_thick_cdk_insula	0.00035659	17632.6	0.523586	0.600573
ksads_p_sad	smri_vol_scs_cbwmatter	0.000168699	17744.2	0.680104	0.496447
ksads_p_sad	smri_vol_scs_ltventricle	-0.00396122	15014.5	-1.21099	0.22592
ksads_p_sad	smri_vol_scs_inflatvent	6.63275e-05	16276.4	0.0114799	0.990841
ksads_p_sad	smri_vol_scs_crbwmatter	0.000553525	17701.7	0.489253	0.624668
ksads_p_sad	smri_vol_scs_crbcortex	-1.1518e-05	16319.2	-0.026733	0.978673
ksads_p_sad	smri_vol_scs_tp	-0.000961189	17693	-1.21383	0.224827
ksads_p_sad	smri_vol_scs_caudate	0.000196808	16579	0.304546	0.760716
ksads_p_sad	smri_vol_scs_putamen	0.000617711	17739.8	0.877127	0.380429
ksads_p_sad	smri_vol_scs_pallidum	-0.000424783	17755.7	-0.284091	0.776344
ksads_p_sad	smri_vol_scs_hpus	0.000116554	16913.4	0.144421	0.88517
ksads_p_sad	smri_vol_scs_amygdala	0.000906618	17132.3	0.672289	0.501409
ksads_p_sad	smri_vol_scs_vedc	-0.00119734	17668.3	-1.91735	0.0552092
ksads_p_pd	smri_area_cdk_bankssts	7.65652e-06	15445	0.00613622	0.995104
ksads_p_pd	smri_area_cdk_cdacate	-0.000546778	15411.8	-0.290327	0.77157
ksads_p_pd	smri_area_cdk_cdmdfr	0.00119984	16236.5	0.979838	0.327181
ksads_p_pd	smri_area_cdk_cuneus	1.25524e-05	15732.3	0.0168823	0.986531
ksads_p_pd	smri_area_cdk_ehinal	0.000775956	17066	0.495035	0.620582
ksads_p_pd	smri_area_cdk_fusiform	0.00110959	15548.3	1.67676	0.0936088
ksads_p_pd	smri_area_cdk_ifpl	-0.000982826	15414.1	-1.11792	0.263619
ksads_p_pd	smri_area_cdk_iftm	-5.2997e-05	15883.8	-0.0691358	0.944882
ksads_p_pd	smri_area_cdk_ihcate	-0.00140821	16413.7	-1.39282	0.163693
ksads_p_pd	smri_area_cdk_locc	-0.000109623	15394.3	-0.161406	0.871776
ksads_p_pd	smri_area_cdk_lobfr	0.000858834	16996.9	1.40891	0.15888
ksads_p_pd	smri_area_cdk_lingual	-0.00144397	15635.8	-2.19061	0.0284946
ksads_p_pd	smri_area_cdk_mobfr	-0.000184285	17314	-0.238785	0.811275
ksads_p_pd	smri_area_cdk_mdtm	0.000922494	15718.1	1.52349	0.127657
ksads_p_pd	smri_area_cdk_parahpal	-0.00167882	16749.8	-1.77472	0.0759626
ksads_p_pd	smri_area_cdk_paracn	0.000298954	16008.7	0.32722	0.743506
ksads_p_pd	smri_area_cdk_parsopc	-0.00204272	15640.8	-1.72615	0.0843396
ksads_p_pd	smri_area_cdk_parsobis	0.000472012	16103.4	0.572565	0.566947
ksads_p_pd	smri_area_cdk_parstgris	-0.000759834	15893.8	-0.675208	0.499554
ksads_p_pd	smri_area_cdk_pericc	-0.000398507	15973.9	-0.551783	0.581104
ksads_p_pd	smri_area_cdk_postcn	0.000221059	16221.8	0.299811	0.764325
ksads_p_pd	smri_area_cdk_ptcate	-0.00156078	15470.9	-1.42106	0.155319
ksads_p_pd	smri_area_cdk_precn	0.000266441	16546	0.407955	0.683312
ksads_p_pd	smri_area_cdk_pc	-0.000374956	16128.1	-0.615073	0.538515
ksads_p_pd	smri_area_cdk_rracate	0.00036807	15919	0.259461	0.795283
ksads_p_pd	smri_area_cdk_rrmdfr	-0.000471541	16111.1	-0.666038	0.505396
ksads_p_pd	smri_area_cdk_sufr	0.000732425	16259.9	1.16853	0.242609
ksads_p_pd	smri_area_cdk_supl	0.000313323	16411.1	0.404186	0.686081
ksads_p_pd	smri_area_cdk_sutm	0.000446513	15834.6	0.747349	0.454864
ksads_p_pd	smri_area_cdk_sm	-0.000152933	16028	-0.134956	0.892649
ksads_p_pd	smri_area_cdk_frpole	-0.00118078	17346.2	-1.13136	0.257919
ksads_p_pd	smri_area_cdk_tmpole	0.000199239	17341.7	0.197072	0.843773
ksads_p_pd	smri_area_cdk_trvtm	0.0011942	16062.5	1.24112	0.214579
ksads_p_pd	smri_area_cdk_insula	-0.000687799	17651.7	-1.00543	0.314705
ksads_p_pd	smri_thick_cdk_bankssts	2.6597e-05	16112.5	0.0549726	0.956161
ksads_p_pd	smri_thick_cdk_cdacate	0.000974509	16009.5	1.62748	0.103654
ksads_p_pd	smri_thick_cdk_cdmdfr	0.000149245	17117	0.4619	0.644159
ksads_p_pd	smri_thick_cdk_cuneus	-0.000159053	16290	-0.387258	0.69857
ksads_p_pd	smri_thick_cdk_ehinal	-0.000980988	17645.7	-1.37107	0.170369
ksads_p_pd	smri_thick_cdk_fusiform	0.000107501	16414.2	0.418517	0.675575
ksads_p_pd	smri_thick_cdk_ifpl	-0.000449703	17095.7	-1.74188	0.0815475
ksads_p_pd	smri_thick_cdk_iftm	-0.000172514	16837.6	-0.574311	0.565765
ksads_p_pd	smri_thick_cdk_ihcate	-7.11086e-05	16620.9	-0.158216	0.874288
ksads_p_pd	smri_thick_cdk_locc	-1.39792e-05	16222	-0.0528212	0.957875
ksads_p_pd	smri_thick_cdk_lobfr	7.85304e-05	17650.2	0.245074	0.806402
ksads_p_pd	smri_thick_cdk_lingual	-9.55535e-05	16479.8	-0.292502	0.769907
ksads_p_pd	smri_thick_cdk_mobfr	0.000634986	17497.3	1.58677	0.112584
ksads_p_pd	smri_thick_cdk_mdtm	-0.000182112	17123.5	-0.566929	0.57077
ksads_p_pd	smri_thick_cdk_parahpal	1.55914e-05	16235.4	0.0294684	0.976491
ksads_p_pd	smri_thick_cdk_paracn	-0.000138161	16801.4	-0.423805	0.671713
ksads_p_pd	smri_thick_cdk_parsopc	-6.85359e-05	17040.7	-0.196856	0.843942
ksads_p_pd	smri_thick_cdk_parsobis	0.000486121	16993.3	1.04698	0.295122
ksads_p_pd	smri_thick_cdk_parstgris	4.62123e-05	17235.4	0.126069	0.899679
ksads_p_pd	smri_thick_cdk_pericc	-0.000478436	16658.7	-0.943415	0.345482
ksads_p_pd	smri_thick_cdk_postcn	3.39984e-05	17229.1	0.096374	0.923225
ksads_p_pd	smri_thick_cdk_ptcate	-0.0001363	16420.3	-0.356056	0.721804
ksads_p_pd	smri_thick_cdk_precn	0.000212055	17323.8	0.63693	0.524179
ksads_p_pd	smri_thick_cdk_pc	-0.000119153	16840.9	-0.5343	0.593141
ksads_p_pd	smri_thick_cdk_rracate	0.00134705	16892	2.39889	0.0164558
ksads_p_pd	smri_thick_cdk_rrmdfr	0.000205554	17090.2	0.771056	0.440684
ksads_p_pd	smri_thick_cdk_sufr	-0.000224003	16867.9	-1.14926	0.250465
ksads_p_pd	smri_thick_cdk_supl	-0.000226545	17081.1	-1.03238	0.30191
ksads_p_pd	smri_thick_cdk_sutm	0.000437178	16644.9	1.6075	0.107964
ksads_p_pd	smri_thick_cdk_sm	6.5637e-05	17280.1	0.202976	0.839156
ksads_p_pd	smri_thick_cdk_frpole	-0.000334053	17175.6	-0.468664	0.639316
ksads_p_pd	smri_thick_cdk_tmpole	-0.000944203	17694.3	-1.49414	0.135158
ksads_p_pd	smri_thick_cdk_trvtm	0.000526525	16619.2	0.999479	0.317577
ksads_p_pd	smri_thick_cdk_insula	5.7652e-06	17682	0.0157072	0.987468
ksads_p_pd	smri_vol_scs_cbwmatter	2.89413e-05	17686.5	0.216873	0.82831
ksads_p_pd	smri_vol_scs_ltventricle	0.00196778	15320.4	1.11014	0.266957
ksads_p_pd	smri_vol_scs_inflatvent	-0.00439252	16531.3	-1.40589	0.159774
ksads_p_pd	smri_vol_scs_crbwmatter	-4.79585e-05	17614.1	-0.0789609	0.937065
ksads_p_pd	smri_vol_scs_crbcortex	0.00027202	16581.5	1.16853	0.242609
ksads_p_pd	smri_vol_scs_tp	0.00015992	17717	0.374897	0.707741
ksads_p_pd	smri_vol_scs_caudate	0.000157115	16815.3	0.449971	0.652737
ksads_p_pd	smri_vol_scs_putamen	0.000421519	17734.9	1.11173	0.266268
ksads_p_pd	smri_vol_scs_pallidum	0.000214964	17718.7	0.267166	0.789345
ksads_p_pd	smri_vol_scs_hpus	1.35059e-05	17105.8	0.030998	0.975272
ksads_p_pd	smri_vol_scs_amygdala	0.00034371	17286.9	0.472489	0.636584
ksads_p_pd	smri_vol_scs_vedc	-0.000448023	17576.3	-1.3348	0.18196
ksads_p_gad	smri_area_cdk_bankssts	-0.00137028	15216.3	-0.622483	0.533634
ksads_p_gad	smri_area_cdk_cdacate	-0.00157486	15169.4	-0.47432	0.635279
ksads_p_gad	smri_area_cdk_cdmdfr	0.000653673	16040.8	0.302377	0.762368
ksads_p_gad	smri_area_cdk_cuneus	-0.000760657	15509.3	-0.579887	0.561999
ksads_p_gad	smri_area_cdk_ehinal	-0.0017113	16947	-0.617539	0.536888
ksads_p_gad	smri_area_cdk_fusiform	0.000770501	15337	0.65929	0.50972
ksads_p_gad	smri_area_cdk_ifpl	-0.00300624	15182	-1.93893	0.0525286
ksads_p_gad	smri_area_cdk_iftm	0.000222702	15671	0.164605	0.869257
ksads_p_gad	smri_area_cdk_ihcate	0.000924284	16232.6	0.517543	0.604784
ksads_p_gad	smri_area_cdk_locc	-0.00124341	15154.6	-1.03816	0.299212
ksads_p_gad	smri_area_cdk_lobfr	0.000523167	16870.2	0.485306	0.627465
ksads_p_gad	smri_area_cdk_lingual	-0.00104107	15407.6	-0.895267	0.370658
ksads_p_gad	smri_area_cdk_mobfr	-0.000363444	17224.1	-0.266288	0.79002
ksads_p_gad	smri_area_cdk_mdtm	-0.000261503	15495.7	-0.24468	0.806707
ksads_p_gad	smri_area_cdk_parahpal	0.00159151	16600.4	0.952044	0.341089
ksads_p_gad	smri_area_cdk_paracn	-0.000826463	15807.4	-0.512249	0.608484
ksads_p_gad	smri_area_cdk_parsopc	0.00030272	15410.6	0.144956	0.884748
ksads_p_gad	smri_area_cdk_parsobis	3.49549e-06	15895.5	0.00240241	0.998083
ksads_p_gad	smri_area_cdk_parstgris	0.000688099	15677.7	0.346536	0.728945
ksads_p_gad	smri_area_cdk_pericc	-0.00200506	15761	-1.57317	0.1157
ksads_p_gad	smri_area_cdk_postcn	0.000285223	16023.3	0.219128	0.826553
ksads_p_gad	smri_area_cdk_ptcate	-0.00249914	15234.5	-1.29069	0.196832
ksads_p_gad	smri_area_cdk_precn	0.000715394	16376.2	0.619989	0.535274
ksads_p_gad	smri_area_cdk_pc	0.000306629	15946.6	0.284644	0.77592
ksads_p_gad	smri_area_cdk_rracate	-0.000826906	15703.8	-0.330237	0.741225
ksads_p_gad	smri_area_cdk_rrmdfr	-0.00118247	15904.6	-0.946331	0.343994
ksads_p_gad	smri_area_cdk_sufr	0.000197028	16070.9	0.177935	0.858777
ksads_p_gad	smri_area_cdk_supl	0.00169983	16246.9	1.24038	0.214854
ksads_p_gad	smri_area_cdk_sutm	0.00124756	15643.5	1.18138	0.23747
ksads_p_gad	smri_area_cdk_sm	-0.000977597	15822.4	-0.488631	0.62511
ksads_p_gad	smri_area_cdk_frpole	0.0010517	17262.5	0.569796	0.568824
ksads_p_gad	smri_area_cdk_tmpole	-0.00558018	17258.4	-3.12015	0.00181055
ksads_p_gad	smri_area_cdk_trvtm	-0.00129449	15880.7	-0.761136	0.446587
ksads_p_gad	smri_area_cdk_insula	3.62929e-05	17699.3	0.0299428	0.976113
ksads_p_gad	smri_thick_cdk_bankssts	-0.000263322	15922.9	-0.308038	0.758058
ksads_p_gad	smri_thick_cdk_cdacate	0.00031826	15799.2	0.301139	0.763312
ksads_p_gad	smri_thick_cdk_cdmdfr	0.000229032	17002.6	0.400849	0.688536
ksads_p_gad	smri_thick_cdk_cuneus	-0.000626203	16111.7	-0.862983	0.388159
ksads_p_gad	smri_thick_cdk_ehinal	-0.000443791	17619.3	-0.350369	0.726066
ksads_p_gad	smri_thick_cdk_fusiform	-0.000539833	16225.7	-1.18999	0.234068
ksads_p_gad	smri_thick_cdk_ifpl	-9.82183e-05	16979.7	-0.215154	0.82965
ksads_p_gad	smri_thick_cdk_iftm	7.84805e-06	16686.3	0.0147871	0.988202
ksads_p_gad	smri_thick_cdk_ihcate	0.00150671	16451.6	1.89802	0.0577115
ksads_p_gad	smri_thick_cdk_locc	8.63152e-05	16028.4	0.184612	0.853535
ksads_p_gad	smri_thick_cdk_lobfr	0.00026051	17623.8	0.459226	0.646078
ksads_p_gad	smri_thick_cdk_lingual	-0.000446888	16299.3	-0.774499	0.438647
ksads_p_gad	smri_thick_cdk_mobfr	7.80885e-05	17436.6	0.110267	0.912199
ksads_p_gad	smri_thick_cdk_mdtm	-5.00678e-05	17006.3	-0.0881017	0.929797
ksads_p_gad	smri_thick_cdk_parahpal	0.00103538	16040.3	1.10861	0.267617
ksads_p_gad	smri_thick_cdk_paracn	0.000404248	16650.4	0.701713	0.482868
ksads_p_gad	smri_thick_cdk_parsopc	-7.56657e-05	16915.9	-0.122947	0.902151
ksads_p_gad	smri_thick_cdk_parsobis	0.00242837	16864.9	2.95964	0.00308427
ksads_p_gad	smri_thick_cdk_parstgris	-0.000144538	17142.2	-0.222884	0.823628
ksads_p_gad	smri_thick_cdk_pericc	0.000330209	16490	0.368573	0.712451
ksads_p_gad	smri_thick_cdk_postcn	0.000563385	17137.4	0.90197	0.367086
ksads_p_gad	smri_thick_cdk_ptcate	0.00105016	16243.3	1.55309	0.120422
ksads_p_gad	smri_thick_cdk_precn	0.000332833	17236.8	0.565303	0.571875
ksads_p_gad	smri_thick_cdk_pc	-0.000142038	16701.7	-0.360091	0.718783
ksads_p_gad	smri_thick_cdk_rracate	0.000776062	16752	0.781662	0.434424
ksads_p_gad	smri_thick_cdk_rrmdfr	4.9969e-05	16973.6	0.106008	0.915577
ksads_p_gad	smri_thick_cdk_sufr	-0.000304311	16720.8	-0.883459	0.377001
ksads_p_gad	smri_thick_cdk_supl	-0.000357166	16960.7	-0.920595	0.357275
ksads_p_gad	smri_thick_cdk_sutm	-0.000223282	16475.4	-0.464161	0.642539
ksads_p_gad	smri_thick_cdk_sm	-0.000250917	17175.2	-0.438368	0.661125
ksads_p_gad	smri_thick_cdk_frpole	8.07818e-05	17068.3	0.0640765	0.94891
ksads_p_gad	smri_thick_cdk_tmpole	-0.000635427	17683.7	-0.567598	0.570315
ksads_p_gad	smri_thick_cdk_trvtm	0.000552542	16463.3	0.593334	0.552966
ksads_p_gad	smri_thick_cdk_insula	7.13565e-05	17667	0.109836	0.912541
ksads_p_gad	smri_vol_scs_cbwmatter	-1.96752e-06	17728.8	-0.00832127	0.993361
ksads_p_gad	smri_vol_scs_ltventricle	0.00565863	15090.3	1.81016	0.0702909
ksads_p_gad	smri_vol_scs_inflatvent	-0.00125335	16359.8	-0.227118	0.820335
ksads_p_gad	smri_vol_scs_crbwmatter	0.00114774	17672.2	1.0645	0.287116
ksads_p_gad	smri_vol_scs_crbcortex	-0.000135034	16411.5	-0.328168	0.742789
ksads_p_gad	smri_vol_scs_tp	-0.000239359	17717.1	-0.316914	0.751312
ksads_p_gad	smri_vol_scs_caudate	0.000904608	16664.8	1.4659	0.142694
ksads_p_gad	smri_vol_scs_putamen	-0.000191823	17750.9	-0.285639	0.775158
ksads_p_gad	smri_vol_scs_pallidum	0.000333279	17750.5	0.233801	0.815142
ksads_p_gad	smri_vol_scs_hpus	-3.77039e-06	16988.4	-0.00489334	0.996096
ksads_p_gad	smri_vol_scs_amygdala	-0.00178874	17198.4	-1.38969	0.164642
ksads_p_gad	smri_vol_scs_vedc	-0.00102354	17633	-1.71995	0.0854591
ksads_p_ocd	smri_area_cdk_bankssts	0.00277804	15372.7	1.53017	0.125994
ksads_p_ocd	smri_area_cdk_cdacate	0.000871489	15340.6	0.318017	0.750476
ksads_p_ocd	smri_area_cdk_cdmdfr	0.000262011	16164.4	0.146993	0.883139
ksads_p_ocd	smri_area_cdk_cuneus	-0.000115832	15659	-0.10705	0.914751
ksads_p_ocd	smri_area_cdk_ehinal	-0.00629681	17003	-2.75905	0.00580316
ksads_p_ocd	smri_area_cdk_fusiform	0.000455779	15474.9	0.473288	0.636015
ksads_p_ocd	smri_area_cdk_ifpl	0.000491584	15345.5	0.384247	0.700801
ksads_p_ocd	smri_area_cdk_iftm	-0.00300311	15806.3	-2.69268	0.00709557
ksads_p_ocd	smri_area_cdk_ihcate	-0.00220731	16343	-1.49976	0.133695
ksads_p_ocd	smri_area_cdk_locc	0.000450813	15321.5	0.456182	0.648265
ksads_p_ocd	smri_area_cdk_lobfr	0.00160573	16932.8	1.80897	0.0704739
ksads_p_ocd	smri_area_cdk_lingual	-0.000126123	15563.5	-0.131464	0.89541
ksads_p_ocd	smri_area_cdk_mobfr	0.000535544	17260.4	0.476387	0.633805
ksads_p_ocd	smri_area_cdk_mdtm	0.00129283	15644.6	1.46712	0.142362
ksads_p_ocd	smri_area_cdk_parahpal	4.66742e-06	16684.2	0.00338841	0.997296
ksads_p_ocd	smri_area_cdk_paracn	-0.00214998	15935.5	-1.617	0.105898
ksads_p_ocd	smri_area_cdk_parsopc	-0.000188154	15567.2	-0.109251	0.913005
ksads_p_ocd	smri_area_cdk_parsobis	0.000767931	16030.1	0.639996	0.522185
ksads_p_ocd	smri_area_cdk_parstgris	0.000880328	15819.7	0.537526	0.590912
ksads_p_ocd	smri_area_cdk_pericc	-0.000424084	15899.8	-0.403455	0.686619
ksads_p_ocd	smri_area_cdk_postcn	7.15986e-05	16149.1	0.066712	0.946812
ksads_p_ocd	smri_area_cdk_ptcate	-0.00201046	15398	-1.25801	0.208407
ksads_p_ocd	smri_area_cdk_precn	0.000586815	16475.7	0.617159	0.537138
ksads_p_ocd	smri_area_cdk_pc	-0.000270636	16055.8	-0.305007	0.760365
ksads_p_ocd	smri_area_cdk_rracate	-0.000436181	15846.2	-0.211266	0.832682
ksads_p_ocd	smri_area_cdk_rrmdfr	-0.00116917	16037.3	-1.13462	0.256553
ksads_p_ocd	smri_area_cdk_sufr	-0.000592326	16189.3	-0.649181	0.51623
ksads_p_ocd	smri_area_cdk_supl	0.000473813	16339	0.41987	0.674586
ksads_p_ocd	smri_area_cdk_sutm	0.00193749	15760.5	2.22864	0.0258517
ksads_p_ocd	smri_area_cdk_sm	-0.00045329	15955.5	-0.274832	0.783449
ksads_p_ocd	smri_area_cdk_frpole	-0.000131484	17293.5	-0.0864798	0.931086
ksads_p_ocd	smri_area_cdk_tmpole	-0.00211816	17289.1	-1.43838	0.150344
ksads_p_ocd	smri_area_cdk_trvtm	0.000207139	15990.8	0.147903	0.882421
ksads_p_ocd	smri_area_cdk_insula	-1.66835e-05	17684.1	-0.016718	0.986662
ksads_p_ocd	smri_thick_cdk_bankssts	-1.22172e-05	16038.7	-0.0173487	0.986159
ksads_p_ocd	smri_thick_cdk_cdacate	0.00162085	15936.2	1.85988	0.0629212
ksads_p_ocd	smri_thick_cdk_cdmdfr	0.000847977	17055.3	1.80211	0.071546
ksads_p_ocd	smri_thick_cdk_cuneus	0.000452856	16215.6	0.757493	0.448765
ksads_p_ocd	smri_thick_cdk_ehinal	0.000134848	17614.4	0.129317	0.897108
ksads_p_ocd	smri_thick_cdk_fusiform	-0.000245941	16343.5	-0.657734	0.510718
ksads_p_ocd	smri_thick_cdk_ifpl	0.000193948	17032.4	0.51579	0.606008
ksads_p_ocd	smri_thick_cdk_iftm	-0.000768715	16770.2	-1.75763	0.0788284
ksads_p_ocd	smri_thick_cdk_ihcate	0.000612481	16552.8	0.936045	0.349264
ksads_p_ocd	smri_thick_cdk_locc	-5.18504e-05	16150	-0.134597	0.892932
ksads_p_ocd	smri_thick_cdk_lobfr	-0.000375233	17619.4	-0.803525	0.421682
ksads_p_ocd	smri_thick_cdk_lingual	-0.00100807	16407.8	-2.11997	0.0340232
ksads_p_ocd	smri_thick_cdk_mobfr	0.000152556	17452.7	0.261634	0.793607
ksads_p_ocd	smri_thick_cdk_mdtm	-0.00064995	17062.1	-1.38934	0.164747
ksads_p_ocd	smri_thick_cdk_parahpal	0.000170572	16163.8	0.221483	0.824719
ksads_p_ocd	smri_thick_cdk_paracn	7.15067e-05	16733.6	0.150639	0.880262
ksads_p_ocd	smri_thick_cdk_parsopc	-0.000221965	16978.4	-0.437791	0.661543
ksads_p_ocd	smri_thick_cdk_parsobis	0.000474747	16929.4	0.702124	0.482612
ksads_p_ocd	smri_thick_cdk_parstgris	-0.000397021	17177.6	-0.743611	0.457122
ksads_p_ocd	smri_thick_cdk_pericc	-0.000685138	16589.7	-0.927917	0.353464
ksads_p_ocd	smri_thick_cdk_postcn	0.000217328	17170.7	0.422952	0.672336
ksads_p_ocd	smri_thick_cdk_ptcate	0.000659099	16351.6	1.18276	0.236923
ksads_p_ocd	smri_thick_cdk_precn	0.000665639	17267	1.37257	0.169904
ksads_p_ocd	smri_thick_cdk_pc	0.000245197	16773.8	0.755113	0.450192
ksads_p_ocd	smri_thick_cdk_rracate	0.000593461	16827.3	0.725674	0.468049
ksads_p_ocd	smri_thick_cdk_rrmdfr	-0.000113058	17029.1	-0.291196	0.770905
ksads_p_ocd	smri_thick_cdk_sufr	0.000531843	16802.6	1.874	0.0609478
ksads_p_ocd	smri_thick_cdk_supl	-6.25963e-05	17019.5	-0.19586	0.844722
ksads_p_ocd	smri_thick_cdk_sutm	-0.00022592	16574.5	-0.570525	0.56833
ksads_p_ocd	smri_thick_cdk_sm	0.000445	17221.1	0.94476	0.344795
ksads_p_ocd	smri_thick_cdk_frpole	-0.000254256	17115.5	-0.244913	0.806526
ksads_p_ocd	smri_thick_cdk_tmpole	-0.00131459	17671.6	-1.4272	0.153541
ksads_p_ocd	smri_thick_cdk_trvtm	0.000832636	16549.2	1.08564	0.277655
ksads_p_ocd	smri_thick_cdk_insula	0.000201846	17656.7	0.377311	0.705947
ksads_p_ocd	smri_vol_scs_cbwmatter	1.14614e-05	17709.6	0.0588847	0.953045
ksads_p_ocd	smri_vol_scs_ltventricle	0.00503396	15248.5	1.95206	0.0509493
ksads_p_ocd	smri_vol_scs_inflatvent	0.00444979	16461.9	0.978265	0.327958
ksads_p_ocd	smri_vol_scs_crbwmatter	0.00102604	17655.5	1.15799	0.246885
ksads_p_ocd	smri_vol_scs_crbcortex	-0.000623265	16508.5	-1.83894	0.0659412
ksads_p_ocd	smri_vol_scs_tp	-0.000493752	17700.6	-0.794066	0.427168
ksads_p_ocd	smri_vol_scs_caudate	-4.59704e-06	16746.7	-0.00904181	0.992786
ksads_p_ocd	smri_vol_scs_putamen	-0.000143477	17730.6	-0.259536	0.795224
ksads_p_ocd	smri_vol_scs_pallidum	0.00108355	17729.9	0.923458	0.355781
ksads_p_ocd	smri_vol_scs_hpus	-0.000222312	17045.7	-0.350353	0.726078
ksads_p_ocd	smri_vol_scs_amygdala	0.00207485	17233.5	1.9583	0.0502112
ksads_p_ocd	smri_vol_scs_vedc	-0.000324125	17624.4	-0.661832	0.508087
ksads_p_odd	smri_area_cdk_bankssts	0.000681118	15983.5	0.422343	0.67278
ksads_p_odd	smri_area_cdk_cdacate	-0.000998262	15943.5	-0.410003	0.68181
ksads_p_odd	smri_area_cdk_cdmdfr	0.00375165	16723.6	2.37704	0.0174631
ksads_p_odd	smri_area_cdk_cuneus	0.00163131	16260.7	1.69904	0.0893307
ksads_p_odd	smri_area_cdk_ehinal	-0.00254628	17430.9	-1.26428	0.206147
ksads_p_odd	smri_area_cdk_fusiform	0.00122947	16093.4	1.43724	0.15067
ksads_p_odd	smri_area_cdk_ifpl	0.000160668	15955.3	0.141379	0.887573
ksads_p_odd	smri_area_cdk_iftm	0.00176377	16410.3	1.78209	0.0747534
ksads_p_odd	smri_area_cdk_ihcate	-0.00151957	16879.7	-1.16675	0.243327
ksads_p_odd	smri_area_cdk_locc	0.000431623	15928.6	0.491739	0.62291
ksads_p_odd	smri_area_cdk_lobfr	0.000118807	17371	0.151678	0.879443
ksads_p_odd	smri_area_cdk_lingual	-0.000253022	16202.8	-0.296593	0.766781
ksads_p_odd	smri_area_cdk_mobfr	0.00191497	17597.3	1.93474	0.053038
ksads_p_odd	smri_area_cdk_mdtm	0.000321769	16262.9	0.411215	0.68092
ksads_p_odd	smri_area_cdk_parahpal	7.22839e-05	17167.2	0.0593666	0.952661
ksads_p_odd	smri_area_cdk_paracn	0.00103701	16516.5	0.879937	0.378906
ksads_p_odd	smri_area_cdk_parsopc	-0.000887792	16173.7	-0.580622	0.561504
ksads_p_odd	smri_area_cdk_parsobis	-0.00121974	16607.1	-1.14772	0.251102
ksads_p_odd	smri_area_cdk_parstgris	-0.000943855	16414.1	-0.649571	0.515979
ksads_p_odd	smri_area_cdk_pericc	0.000521446	16485	0.559733	0.575669
ksads_p_odd	smri_area_cdk_postcn	0.000419724	16714.8	0.441713	0.658703
ksads_p_odd	smri_area_cdk_ptcate	-0.00251915	15996.5	-1.77453	0.0759952
ksads_p_odd	smri_area_cdk_precn	0.000239257	17002.7	0.284563	0.775982
ksads_p_odd	smri_area_cdk_pc	-0.000139426	16628	-0.177336	0.859247
ksads_p_odd	smri_area_cdk_rracate	0.000500676	16438.8	0.273468	0.784497
ksads_p_odd	smri_area_cdk_rrmdfr	-0.00233986	16614.6	-2.5637	0.0103649
ksads_p_odd	smri_area_cdk_sufr	-0.000415937	16749	-0.514855	0.606661
ksads_p_odd	smri_area_cdk_supl	-0.00109128	16885.4	-1.09301	0.274406
ksads_p_odd	smri_area_cdk_sutm	-0.000691773	16353.6	-0.89697	0.369748
ksads_p_odd	smri_area_cdk_sm	0.000361643	16536.1	0.247448	0.804564
ksads_p_odd	smri_area_cdk_frpole	0.00104949	17619.3	0.783961	0.433074
ksads_p_odd	smri_area_cdk_tmpole	-0.000796516	17611.2	-0.614346	0.538995
ksads_p_odd	smri_area_cdk_trvtm	-0.000755294	16565.7	-0.608423	0.542915
ksads_p_odd	smri_area_cdk_insula	-0.00159973	17392.9	-1.83806	0.0660708
ksads_p_odd	smri_thick_cdk_bankssts	-0.000782684	16616.8	-1.25472	0.209597
ksads_p_odd	smri_thick_cdk_cdacate	0.00142405	16523.9	1.84349	0.0652752
ksads_p_odd	smri_thick_cdk_cdmdfr	0.000664267	17465.8	1.60121	0.109349
ksads_p_odd	smri_thick_cdk_cuneus	-0.000442237	16782.1	-0.835171	0.403633
ksads_p_odd	smri_thick_cdk_ehinal	0.000977297	17743.9	1.06799	0.285541
ksads_p_odd	smri_thick_cdk_fusiform	-0.000743563	16888.9	-2.24618	0.0247053
ksads_p_odd	smri_thick_cdk_ifpl	-0.000364204	17449	-1.09859	0.271962
ksads_p_odd	smri_thick_cdk_iftm	-0.000835134	17252.8	-2.16234	0.0306055
ksads_p_odd	smri_thick_cdk_ihcate	0.000535515	17069.3	0.925369	0.354787
ksads_p_odd	smri_thick_cdk_locc	-0.000314296	16718.4	-0.921172	0.356974
ksads_p_odd	smri_thick_cdk_lobfr	0.000543783	17744	1.32731	0.184423
ksads_p_odd	smri_thick_cdk_lingual	-0.000639168	16957.2	-1.51921	0.12873
ksads_p_odd	smri_thick_cdk_mobfr	-0.000126726	17700	-0.247137	0.804805
ksads_p_odd	smri_thick_cdk_mdtm	-0.000686201	17474.8	-1.66309	0.0963124
ksads_p_odd	smri_thick_cdk_parahpal	-0.00129986	16725.5	-1.90589	0.056682
ksads_p_odd	smri_thick_cdk_paracn	0.000324661	17220.7	0.774489	0.438652
ksads_p_odd	smri_thick_cdk_parsopc	0.000828627	17402.6	1.85311	0.0638835
ksads_p_odd	smri_thick_cdk_parsobis	0.000272948	17368.7	0.457477	0.647334
ksads_p_odd	smri_thick_cdk_parstgris	8.37276e-06	17548.1	0.017798	0.9858
ksads_p_odd	smri_thick_cdk_pericc	8.20685e-06	17102.6	0.0125728	0.989969
ksads_p_odd	smri_thick_cdk_postcn	-0.000627963	17546.2	-1.38738	0.165345
ksads_p_odd	smri_thick_cdk_ptcate	0.00123401	16897	2.50194	0.012361
ksads_p_odd	smri_thick_cdk_precn	0.00038834	17608.3	0.909809	0.362936
ksads_p_odd	smri_thick_cdk_pc	4.88972e-05	17248.4	0.170522	0.864602
ksads_p_odd	smri_thick_cdk_rracate	0.000756145	17289.8	1.04723	0.295006
ksads_p_odd	smri_thick_cdk_rrmdfr	0.000576069	17441.4	1.68285	0.0924226
ksads_p_odd	smri_thick_cdk_sufr	0.000385124	17273	1.53709	0.12429
ksads_p_odd	smri_thick_cdk_supl	0.000277355	17438	0.984085	0.325087
ksads_p_odd	smri_thick_cdk_sutm	0.00019346	17096.9	0.5527	0.580476
ksads_p_odd	smri_thick_cdk_sm	-0.000550542	17581.6	-1.32709	0.184496
ksads_p_odd	smri_thick_cdk_frpole	-9.55059e-05	17508.7	-0.104373	0.916874
ksads_p_odd	smri_thick_cdk_tmpole	-0.00152094	17735.2	-1.88356	0.0596403
ksads_p_odd	smri_thick_cdk_trvtm	0.000428993	17065.5	0.632579	0.527017
ksads_p_odd	smri_thick_cdk_insula	-0.000488247	17740.5	-1.04067	0.298043
ksads_p_odd	smri_vol_scs_cbwmatter	0.000150903	17468.2	0.88839	0.374343
ksads_p_odd	smri_vol_scs_ltventricle	0.000649473	15849.6	0.283399	0.776875
ksads_p_odd	smri_vol_scs_inflatvent	0.00117693	16986.3	0.292557	0.769865
ksads_p_odd	smri_vol_scs_crbwmatter	0.000267154	17307.7	0.345858	0.729454
ksads_p_odd	smri_vol_scs_crbcortex	-0.000279752	17061.4	-0.934057	0.350288
ksads_p_odd	smri_vol_scs_tp	-0.000841067	17720.5	-1.544	0.122605
ksads_p_odd	smri_vol_scs_caudate	0.000493635	17236.9	1.09899	0.271786
ksads_p_odd	smri_vol_scs_putamen	0.000440841	17661	0.911421	0.362086
ksads_p_odd	smri_vol_scs_pallidum	0.000102578	17563.3	0.100072	0.920288
ksads_p_odd	smri_vol_scs_hpus	-0.000814967	17450.8	-1.45657	0.145254
ksads_p_odd	smri_vol_scs_amygdala	0.00265991	17578.8	2.85106	0.00436251
ksads_p_odd	smri_vol_scs_vedc	-0.000119858	17237.6	-0.280971	0.778736
ksads_p_asd	smri_area_cdk_bankssts	-0.00031861	16136.4	-0.244534	0.80682
ksads_p_asd	smri_area_cdk_cdacate	-0.00155223	16100	-0.789158	0.430031
ksads_p_asd	smri_area_cdk_cdmdfr	0.00255822	16846.9	2.00752	0.0447101
ksads_p_asd	smri_area_cdk_cuneus	-0.000970119	16407	-1.25106	0.210932
ksads_p_asd	smri_area_cdk_ehinal	-0.000851778	17488.3	-0.524491	0.599944
ksads_p_asd	smri_area_cdk_fusiform	0.000919199	16233.1	1.33081	0.183271
ksads_p_asd	smri_area_cdk_ifpl	-0.00028991	16105.3	-0.315714	0.752224
ksads_p_asd	smri_area_cdk_iftm	0.00105824	16539.6	1.32447	0.185364
ksads_p_asd	smri_area_cdk_ihcate	0.000171318	16994.1	0.162939	0.870568
ksads_p_asd	smri_area_cdk_locc	-0.000415516	16087.3	-0.585749	0.558052
ksads_p_asd	smri_area_cdk_lobfr	0.0011813	17440.8	1.8698	0.0615279
ksads_p_asd	smri_area_cdk_lingual	0.000320435	16317.7	0.465843	0.641334
ksads_p_asd	smri_area_cdk_mobfr	0.000339274	17634.7	0.42507	0.670791
ksads_p_asd	smri_area_cdk_mdtm	0.0010072	16395.8	1.5949	0.110755
ksads_p_asd	smri_area_cdk_parahpal	0.000549881	17259.9	0.559886	0.575564
ksads_p_asd	smri_area_cdk_paracn	-0.000513146	16652.4	-0.539145	0.589794
ksads_p_asd	smri_area_cdk_parsopc	4.18612e-05	16320.4	0.033901	0.972956
ksads_p_asd	smri_area_cdk_parsobis	0.0013179	16739.8	1.53544	0.124694
ksads_p_asd	smri_area_cdk_parstgris	-0.0006638	16547.2	-0.565903	0.571467
ksads_p_asd	smri_area_cdk_pericc	-0.000671232	16625	-0.892058	0.372375
ksads_p_asd	smri_area_cdk_postcn	0.000104622	16840.5	0.136343	0.891552
ksads_p_asd	smri_area_cdk_ptcate	-0.00177956	16149.4	-1.55164	0.120768
ksads_p_asd	smri_area_cdk_precn	0.000217309	17108.5	0.320213	0.748811
ksads_p_asd	smri_area_cdk_pc	0.000301419	16754.2	0.47485	0.6349
ksads_p_asd	smri_area_cdk_rracate	-0.00294163	16572.5	-1.98994	0.0466144
ksads_p_asd	smri_area_cdk_rrmdfr	-0.000847863	16747.2	-1.15027	0.250049
ksads_p_asd	smri_area_cdk_sufr	-0.000779336	16872.6	-1.19485	0.232162
ksads_p_asd	smri_area_cdk_supl	-0.000384503	17001.2	-0.477047	0.633335
ksads_p_asd	smri_area_cdk_sutm	9.5531e-05	16494.6	0.153355	0.87812
ksads_p_asd	smri_area_cdk_sm	0.000946471	16669.9	0.801815	0.422671
ksads_p_asd	smri_area_cdk_frpole	0.00230131	17653.2	2.13294	0.0329438
ksads_p_asd	smri_area_cdk_tmpole	0.000374769	17647.1	0.358504	0.719971
ksads_p_asd	smri_area_cdk_trvtm	0.00106886	16694.1	1.06641	0.286253
ksads_p_asd	smri_area_cdk_insula	0.000136774	17329.9	0.195229	0.845216
ksads_p_asd	smri_thick_cdk_bankssts	-0.000506903	16745.3	-1.00623	0.31432
ksads_p_asd	smri_thick_cdk_cdacate	-0.000320149	16654.9	-0.513227	0.607799
ksads_p_asd	smri_thick_cdk_cdmdfr	0.000153077	17527.2	0.457497	0.647319
ksads_p_asd	smri_thick_cdk_cuneus	0.00032757	16899	0.766624	0.443316
ksads_p_asd	smri_thick_cdk_ehinal	-0.00117601	17732.5	-1.59522	0.110682
ksads_p_asd	smri_thick_cdk_fusiform	-0.000201013	16998.9	-0.752601	0.4517
ksads_p_asd	smri_thick_cdk_ifpl	8.12721e-05	17512.7	0.303918	0.761194
ksads_p_asd	smri_thick_cdk_iftm	7.54168e-05	17335.6	0.242022	0.808766
ksads_p_asd	smri_thick_cdk_ihcate	0.000466692	17162.3	0.999634	0.317502
ksads_p_asd	smri_thick_cdk_locc	0.0001993	16841.5	0.723605	0.469318
ksads_p_asd	smri_thick_cdk_lobfr	-0.000311712	17731.4	-0.944201	0.34508
ksads_p_asd	smri_thick_cdk_lingual	-0.000680407	17061.4	-2.00413	0.0450724
ksads_p_asd	smri_thick_cdk_mobfr	0.000840705	17714.9	2.03501	0.0418646
ksads_p_asd	smri_thick_cdk_mdtm	-0.000733047	17529	-2.20389	0.0275448
ksads_p_asd	smri_thick_cdk_parahpal	-0.00092424	16847.8	-1.67856	0.0932573
ksads_p_asd	smri_thick_cdk_paracn	0.00023541	17309.3	0.695963	0.486461
ksads_p_asd	smri_thick_cdk_parsopc	4.8508e-05	17471.7	0.134458	0.893042
ksads_p_asd	smri_thick_cdk_parsobis	9.27984e-05	17441.2	0.19282	0.847102
ksads_p_asd	smri_thick_cdk_parstgris	-0.000355332	17594.5	-0.93683	0.348859
ksads_p_asd	smri_thick_cdk_pericc	0.000119857	17198.9	0.227585	0.819972
ksads_p_asd	smri_thick_cdk_postcn	-0.000396741	17594.1	-1.08692	0.277087
ksads_p_asd	smri_thick_cdk_ptcate	0.000350685	17001.9	0.880992	0.378335
ksads_p_asd	smri_thick_cdk_precn	0.000198801	17647.6	0.577553	0.563573
ksads_p_asd	smri_thick_cdk_pc	-0.000214047	17333.6	-0.925171	0.35489
ksads_p_asd	smri_thick_cdk_rracate	4.61834e-05	17370.6	0.0792861	0.936806
ksads_p_asd	smri_thick_cdk_rrmdfr	0.000270676	17505.2	0.980171	0.327015
ksads_p_asd	smri_thick_cdk_sufr	-0.000141445	17354.6	-0.699582	0.484197
ksads_p_asd	smri_thick_cdk_supl	0.000134714	17501.4	0.592628	0.553438
ksads_p_asd	smri_thick_cdk_sutm	-0.000237775	17190.5	-0.841903	0.399854
ksads_p_asd	smri_thick_cdk_sm	5.77308e-06	17625.2	0.0172617	0.986228
ksads_p_asd	smri_thick_cdk_frpole	-7.10763e-05	17561.7	-0.0963294	0.92326
ksads_p_asd	smri_thick_cdk_tmpole	-0.000993395	17711.4	-1.5272	0.126729
ksads_p_asd	smri_thick_cdk_trvtm	-7.44633e-05	17164.2	-0.136078	0.891761
ksads_p_asd	smri_thick_cdk_insula	-0.000141258	17720.4	-0.373774	0.708577
ksads_p_asd	smri_vol_scs_cbwmatter	5.06695e-05	17407.6	0.370496	0.711017
ksads_p_asd	smri_vol_scs_ltventricle	-0.00101308	16006.3	-0.546919	0.584442
ksads_p_asd	smri_vol_scs_inflatvent	-0.00217193	17093.9	-0.668846	0.503603
ksads_p_asd	smri_vol_scs_crbwmatter	-0.000172833	17241.7	-0.278023	0.780998
ksads_p_asd	smri_vol_scs_crbcortex	-0.000441336	17170	-1.82594	0.067876
ksads_p_asd	smri_vol_scs_tp	-0.000275403	17689.5	-0.627646	0.530244
ksads_p_asd	smri_vol_scs_caudate	0.000274247	17319.7	0.757062	0.449023
ksads_p_asd	smri_vol_scs_putamen	-0.000178021	17617.4	-0.457022	0.647661
ksads_p_asd	smri_vol_scs_pallidum	0.00148798	17510.9	1.80297	0.0714102
ksads_p_asd	smri_vol_scs_hpus	-0.000563804	17510.2	-1.24925	0.21159
ksads_p_asd	smri_vol_scs_amygdala	0.00140999	17620.9	1.87391	0.0609589
ksads_p_asd	smri_vol_scs_vedc	-0.000517151	17173.7	-1.50622	0.13203
ksads_p_ptsd	smri_area_cdk_bankssts	1.55551e-05	15894.8	0.00590079	0.995292
ksads_p_ptsd	smri_area_cdk_cdacate	0.00410581	15863	1.03178	0.302189
ksads_p_ptsd	smri_area_cdk_cdmdfr	0.00281898	16610.8	1.09187	0.274908
ksads_p_ptsd	smri_area_cdk_cuneus	-0.000443758	16161.3	-0.282713	0.777401
ksads_p_ptsd	smri_area_cdk_ehinal	-0.00540779	17304.6	-1.64045	0.10093
ksads_p_ptsd	smri_area_cdk_fusiform	0.000390977	15991.3	0.279715	0.7797
ksads_p_ptsd	smri_area_cdk_ifpl	0.000584333	15866.9	0.31454	0.753115
ksads_p_ptsd	smri_area_cdk_iftm	0.00106299	16296.3	0.657115	0.511116
ksads_p_ptsd	smri_area_cdk_ihcate	-0.00112297	16762.7	-0.527031	0.598179
ksads_p_ptsd	smri_area_cdk_locc	-0.000506578	15846.6	-0.352996	0.724096
ksads_p_ptsd	smri_area_cdk_lobfr	0.00178675	17248.9	1.39339	0.163521
ksads_p_ptsd	smri_area_cdk_lingual	-0.00114044	16073.8	-0.819225	0.41267
ksads_p_ptsd	smri_area_cdk_mobfr	0.000777801	17491.4	0.479613	0.631509
ksads_p_ptsd	smri_area_cdk_mdtm	0.00141418	16151.1	1.10624	0.268641
ksads_p_ptsd	smri_area_cdk_parahpal	-0.00202745	17047.2	-1.01792	0.308731
ksads_p_ptsd	smri_area_cdk_paracn	0.00143693	16410.6	0.745529	0.455963
ksads_p_ptsd	smri_area_cdk_parsopc	0.000923783	16076	0.369661	0.71164
ksads_p_ptsd	smri_area_cdk_parsobis	0.00104455	16495	0.600819	0.547969
ksads_p_ptsd	smri_area_cdk_parstgris	0.000261975	16304.9	0.110313	0.912162
ksads_p_ptsd	smri_area_cdk_pericc	-0.000533204	16380.3	-0.349941	0.726388
ksads_p_ptsd	smri_area_cdk_postcn	-0.00253556	16601.4	-1.63115	0.102878
ksads_p_ptsd	smri_area_cdk_ptcate	-0.00332716	15913.6	-1.43385	0.151634
ksads_p_ptsd	smri_area_cdk_precn	-0.000200471	16878.7	-0.145719	0.884145
ksads_p_ptsd	smri_area_cdk_pc	-0.000134353	16514.7	-0.1045	0.916774
ksads_p_ptsd	smri_area_cdk_rracate	-0.00230133	16328.1	-0.76883	0.442005
ksads_p_ptsd	smri_area_cdk_rrmdfr	-0.000375876	16503.3	-0.251751	0.801237
ksads_p_ptsd	smri_area_cdk_sufr	-0.000283593	16632.1	-0.214608	0.830075
ksads_p_ptsd	smri_area_cdk_supl	0.000424283	16764	0.259742	0.795066
ksads_p_ptsd	smri_area_cdk_sutm	0.00196309	16252.7	1.5568	0.119538
ksads_p_ptsd	smri_area_cdk_sm	-0.00100318	16427.5	-0.419651	0.674746
ksads_p_ptsd	smri_area_cdk_frpole	0.00553985	17515.5	2.52675	0.0115209
ksads_p_ptsd	smri_area_cdk_tmpole	-0.00289134	17510.6	-1.36118	0.173473
ksads_p_ptsd	smri_area_cdk_trvtm	0.0003886	16455	0.191447	0.848177
ksads_p_ptsd	smri_area_cdk_insula	0.00114913	17597	0.802209	0.422443
ksads_p_ptsd	smri_thick_cdk_bankssts	-0.000896826	16503.3	-0.878937	0.379448
ksads_p_ptsd	smri_thick_cdk_cdacate	-0.000611961	16410.2	-0.484448	0.628075
ksads_p_ptsd	smri_thick_cdk_cdmdfr	-0.000160959	17346.2	-0.236916	0.812725
ksads_p_ptsd	smri_thick_cdk_cuneus	-0.00164564	16660.6	-1.90098	0.0573224
ksads_p_ptsd	smri_thick_cdk_ehinal	0.000664172	17708.6	0.442442	0.658175
ksads_p_ptsd	smri_thick_cdk_fusiform	-0.000394206	16765.2	-0.728288	0.466448
ksads_p_ptsd	smri_thick_cdk_ifpl	-0.000518423	17329	-0.954878	0.339653
ksads_p_ptsd	smri_thick_cdk_iftm	-0.000761471	17123	-1.20458	0.228381
ksads_p_ptsd	smri_thick_cdk_ihcate	0.00181015	16940.9	1.91249	0.0558308
ksads_p_ptsd	smri_thick_cdk_locc	0.000939199	16600.3	1.68337	0.092322
ksads_p_ptsd	smri_thick_cdk_lobfr	-0.000110026	17710.9	-0.16367	0.869993
ksads_p_ptsd	smri_thick_cdk_lingual	-0.000788789	16826.4	-1.14613	0.251756
ksads_p_ptsd	smri_thick_cdk_mobfr	0.00164622	17620.4	1.9593	0.050094
ksads_p_ptsd	smri_thick_cdk_mdtm	-0.000274934	17349.4	-0.407048	0.683978
ksads_p_ptsd	smri_thick_cdk_parahpal	-0.000447167	16609.6	-0.400859	0.688529
ksads_p_ptsd	smri_thick_cdk_paracn	-0.000406857	17094	-0.592951	0.553222
ksads_p_ptsd	smri_thick_cdk_parsopc	0.000627074	17283.8	0.85634	0.391822
ksads_p_ptsd	smri_thick_cdk_parsobis	-0.000256018	17246.9	-0.26211	0.793239
ksads_p_ptsd	smri_thick_cdk_parstgris	0.000460113	17434.7	0.597191	0.550388
ksads_p_ptsd	smri_thick_cdk_pericc	0.000370293	16975.3	0.346744	0.728788
ksads_p_ptsd	smri_thick_cdk_postcn	0.000241558	17431.3	0.32578	0.744595
ksads_p_ptsd	smri_thick_cdk_ptcate	0.000739505	16771.1	0.916705	0.35931
ksads_p_ptsd	smri_thick_cdk_precn	-0.000174559	17502.4	-0.249547	0.802941
ksads_p_ptsd	smri_thick_cdk_pc	-0.000534729	17124.7	-1.13931	0.25459
ksads_p_ptsd	smri_thick_cdk_rracate	0.000581002	17165.6	0.491616	0.622997
ksads_p_ptsd	smri_thick_cdk_rrmdfr	0.000774544	17323.3	1.3816	0.167113
ksads_p_ptsd	smri_thick_cdk_sufr	0.000376218	17147.9	0.917169	0.359067
ksads_p_ptsd	smri_thick_cdk_supl	-0.000123425	17317.3	-0.267446	0.789129
ksads_p_ptsd	smri_thick_cdk_sutm	-0.000442516	16963.7	-0.772688	0.439718
ksads_p_ptsd	smri_thick_cdk_sm	-0.00019986	17470.8	-0.294117	0.768672
ksads_p_ptsd	smri_thick_cdk_frpole	-0.000170763	17390.4	-0.113959	0.909272
ksads_p_ptsd	smri_thick_cdk_tmpole	-0.00134969	17729.8	-1.01838	0.30851
ksads_p_ptsd	smri_thick_cdk_trvtm	0.0020817	16939.7	1.87648	0.0606073
ksads_p_ptsd	smri_thick_cdk_insula	-0.00060571	17725.2	-0.786816	0.4314
ksads_p_ptsd	smri_vol_scs_cbwmatter	3.67977e-05	17638.1	0.131664	0.895251
ksads_p_ptsd	smri_vol_scs_ltventricle	-0.000785159	15772	-0.209561	0.834013
ksads_p_ptsd	smri_vol_scs_inflatvent	-0.00122813	16865.2	-0.186578	0.851993
ksads_p_ptsd	smri_vol_scs_crbwmatter	0.00395386	17551.9	3.11015	0.00187294
ksads_p_ptsd	smri_vol_scs_crbcortex	-0.000346009	16924.7	-0.705887	0.480268
ksads_p_ptsd	smri_vol_scs_tp	-5.30516e-05	17734.8	-0.0593163	0.952701
ksads_p_ptsd	smri_vol_scs_caudate	-3.26961e-05	17105.6	-0.0444913	0.964513
ksads_p_ptsd	smri_vol_scs_putamen	0.000539704	17724.7	0.679183	0.497031
ksads_p_ptsd	smri_vol_scs_pallidum	-0.000997509	17684.2	-0.591813	0.553983
ksads_p_ptsd	smri_vol_scs_hpus	0.000434682	17332	0.474408	0.635215
ksads_p_ptsd	smri_vol_scs_amygdala	-0.000691556	17470.7	-0.452365	0.651011
ksads_p_ptsd	smri_vol_scs_vedc	-0.00243855	17509.9	-3.47163	0.000518556
ksads_p_slp	smri_area_cdk_bankssts	0.000165393	15205.6	0.0915059	0.927092
ksads_p_slp	smri_area_cdk_cdacate	0.00217324	15163.1	0.797157	0.425372
ksads_p_slp	smri_area_cdk_cdmdfr	0.00264741	16003.4	1.49155	0.135838
ksads_p_slp	smri_area_cdk_cuneus	-0.00298217	15490.1	-2.76941	0.0056225
ksads_p_slp	smri_area_cdk_ehinal	-0.000253143	16888.2	-0.111207	0.911454
ksads_p_slp	smri_area_cdk_fusiform	0.00173654	15322.7	1.80985	0.070339
ksads_p_slp	smri_area_cdk_ifpl	-0.000409338	15177.6	-0.321482	0.747849
ksads_p_slp	smri_area_cdk_iftm	0.00313591	15642.3	2.82375	0.00475254
ksads_p_slp	smri_area_cdk_ihcate	0.00151672	16193.9	1.0342	0.301056
ksads_p_slp	smri_area_cdk_locc	-0.000690763	15147.2	-0.702389	0.482447
ksads_p_slp	smri_area_cdk_lobfr	0.00120284	16813.1	1.35846	0.174335
ksads_p_slp	smri_area_cdk_lingual	-0.00132932	15392.4	-1.39225	0.163866
ksads_p_slp	smri_area_cdk_mobfr	9.19909e-06	17162.8	0.00820345	0.993455
ksads_p_slp	smri_area_cdk_mdtm	-0.000939852	15477.5	-1.07101	0.284182
ksads_p_slp	smri_area_cdk_parahpal	0.000287258	16551.3	0.209225	0.834275
ksads_p_slp	smri_area_cdk_paracn	-0.00275779	15778.7	-2.08195	0.0373633
ksads_p_slp	smri_area_cdk_parsopc	0.0015019	15394.7	0.875904	0.381096
ksads_p_slp	smri_area_cdk_parsobis	-0.00133445	15864.5	-1.11698	0.264018
ksads_p_slp	smri_area_cdk_parstgris	9.31308e-05	15654.5	0.0571201	0.95445
ksads_p_slp	smri_area_cdk_pericc	-0.00154564	15736.6	-1.47682	0.139743
ksads_p_slp	smri_area_cdk_postcn	-0.00110301	15989.2	-1.032	0.302088
ksads_p_slp	smri_area_cdk_ptcate	0.00150296	15229.4	0.945244	0.344549
ksads_p_slp	smri_area_cdk_precn	0.00101568	16330.6	1.07187	0.283793
ksads_p_slp	smri_area_cdk_pc	-9.96633e-05	15915.5	-0.11267	0.910294
ksads_p_slp	smri_area_cdk_rracate	-0.00138879	15679.5	-0.675475	0.499384
ksads_p_slp	smri_area_cdk_rrmdfr	-0.0011365	15872.4	-1.10769	0.268013
ksads_p_slp	smri_area_cdk_sufr	0.000301323	16035.9	0.331386	0.740358
ksads_p_slp	smri_area_cdk_supl	0.000147638	16204.9	0.131183	0.895632
ksads_p_slp	smri_area_cdk_sutm	0.000454233	15621.7	0.523832	0.600403
ksads_p_slp	smri_area_cdk_sm	0.00134436	15793	0.818356	0.413166
ksads_p_slp	smri_area_cdk_frpole	0.00125923	17200.3	0.830337	0.40636
ksads_p_slp	smri_area_cdk_tmpole	-0.00202646	17200.8	-1.37871	0.168002
ksads_p_slp	smri_area_cdk_trvtm	0.00127092	15855	0.910037	0.362817
ksads_p_slp	smri_area_cdk_insula	-0.00018346	17737.1	-0.183861	0.854125
ksads_p_slp	smri_thick_cdk_bankssts	-0.000168345	15891.6	-0.23983	0.810465
ksads_p_slp	smri_thick_cdk_cdacate	-0.00143036	15768.7	-1.64845	0.0992805
ksads_p_slp	smri_thick_cdk_cdmdfr	-0.000310818	16940.9	-0.662215	0.507843
ksads_p_slp	smri_thick_cdk_cuneus	-0.000822938	16073.5	-1.38115	0.167251
ksads_p_slp	smri_thick_cdk_ehinal	-0.000778793	17569	-0.747939	0.454507
ksads_p_slp	smri_thick_cdk_fusiform	0.000514456	16188.5	1.38093	0.16732
ksads_p_slp	smri_thick_cdk_ifpl	-0.000362173	16918.3	-0.965821	0.334147
ksads_p_slp	smri_thick_cdk_iftm	-0.000800787	16630.8	-1.83724	0.0661925
ksads_p_slp	smri_thick_cdk_ihcate	-4.21872e-05	16406.6	-0.0647034	0.948411
ksads_p_slp	smri_thick_cdk_locc	-0.000215048	15994	-0.560125	0.575402
ksads_p_slp	smri_thick_cdk_lobfr	0.000316366	17574	0.678389	0.497534
ksads_p_slp	smri_thick_cdk_lingual	0.00028773	16255.2	0.607219	0.543714
ksads_p_slp	smri_thick_cdk_mobfr	-0.000842216	17376.3	-1.44724	0.147849
ksads_p_slp	smri_thick_cdk_mdtm	-0.000899942	16944.5	-1.92798	0.0538749
ksads_p_slp	smri_thick_cdk_parahpal	-0.000734627	16006.9	-0.957869	0.338143
ksads_p_slp	smri_thick_cdk_paracn	3.6403e-05	16596.2	0.0769363	0.938675
ksads_p_slp	smri_thick_cdk_parsopc	-0.000603098	16858.4	-1.19305	0.232868
ksads_p_slp	smri_thick_cdk_parsobis	0.000545921	16806.6	0.809851	0.418037
ksads_p_slp	smri_thick_cdk_parstgris	-0.000888852	17079.4	-1.66851	0.0952322
ksads_p_slp	smri_thick_cdk_pericc	-0.000132582	16442.2	-0.18019	0.857006
ksads_p_slp	smri_thick_cdk_postcn	-7.58009e-05	17073.9	-0.147711	0.882573
ksads_p_slp	smri_thick_cdk_ptcate	-0.000516798	16200.8	-0.930721	0.352012
ksads_p_slp	smri_thick_cdk_precn	-3.19043e-05	17171.3	-0.0659508	0.947418
ksads_p_slp	smri_thick_cdk_pc	-3.23311e-05	16648	-0.0997957	0.920508
ksads_p_slp	smri_thick_cdk_rracate	-0.000215283	16696.7	-0.263999	0.791784
ksads_p_slp	smri_thick_cdk_rrmdfr	0.000111963	16914.5	0.289156	0.772466
ksads_p_slp	smri_thick_cdk_sufr	0.000176784	16667.7	0.624849	0.532079
ksads_p_slp	smri_thick_cdk_supl	0.000386161	16899.5	1.21172	0.225636
ksads_p_slp	smri_thick_cdk_sutm	7.17717e-05	16425.9	0.181667	0.855846
ksads_p_slp	smri_thick_cdk_sm	-0.000407348	17109.9	-0.86621	0.386387
ksads_p_slp	smri_thick_cdk_frpole	-1.05292e-06	17005.8	-0.00101664	0.999189
ksads_p_slp	smri_thick_cdk_tmpole	-8.76055e-05	17641.1	-0.0951724	0.924179
ksads_p_slp	smri_thick_cdk_trvtm	0.000568186	16417	0.742915	0.457544
ksads_p_slp	smri_thick_cdk_insula	0.000373383	17622.9	0.699044	0.484534
ksads_p_slp	smri_vol_scs_cbwmatter	2.9206e-05	17751.3	0.150076	0.880707
ksads_p_slp	smri_vol_scs_ltventricle	0.0029425	15083.4	1.14638	0.251657
ksads_p_slp	smri_vol_scs_inflatvent	-0.000504611	16316.8	-0.111346	0.911344
ksads_p_slp	smri_vol_scs_crbwmatter	0.00127982	17721.7	1.44173	0.149396
ksads_p_slp	smri_vol_scs_crbcortex	-5.79182e-05	16357.1	-0.171388	0.863921
ksads_p_slp	smri_vol_scs_tp	8.22291e-05	17683.5	0.132394	0.894674
ksads_p_slp	smri_vol_scs_caudate	0.00015764	16608.2	0.311022	0.755788
ksads_p_slp	smri_vol_scs_putamen	-0.000221085	17732.5	-0.400225	0.688996
ksads_p_slp	smri_vol_scs_pallidum	0.0014357	17755.8	1.22403	0.220957
ksads_p_slp	smri_vol_scs_hpus	-0.000405053	16930.8	-0.639962	0.522206
ksads_p_slp	smri_vol_scs_amygdala	0.00110702	17140.6	1.04675	0.29523
ksads_p_slp	smri_vol_scs_vedc	0.000230537	17696.7	0.470389	0.638083
ksads_p_si	smri_area_cdk_bankssts	0.00117803	15523.9	0.666022	0.505407
ksads_p_si	smri_area_cdk_cdacate	0.00122639	15477.8	0.459628	0.64579
ksads_p_si	smri_area_cdk_cdmdfr	0.00396206	16310.9	2.28462	0.0223476
ksads_p_si	smri_area_cdk_cuneus	-0.00158658	15810.1	-1.50616	0.132045
ksads_p_si	smri_area_cdk_ehinal	-0.000650284	17147.9	-0.292967	0.769551
ksads_p_si	smri_area_cdk_fusiform	0.00243797	15642.1	2.59724	0.00940647
ksads_p_si	smri_area_cdk_ifpl	-0.000669005	15491.9	-0.53687	0.591365
ksads_p_si	smri_area_cdk_iftm	0.00146754	15965.6	1.35101	0.176711
ksads_p_si	smri_area_cdk_ihcate	-0.000740578	16497	-0.516961	0.605191
ksads_p_si	smri_area_cdk_locc	0.000654038	15463.1	0.679525	0.496816
ksads_p_si	smri_area_cdk_lobfr	-0.000173328	17080.8	-0.200701	0.840934
ksads_p_si	smri_area_cdk_lingual	0.000484987	15711.6	0.519215	0.603618
ksads_p_si	smri_area_cdk_mobfr	-0.000495341	17386.5	-0.453403	0.650264
ksads_p_si	smri_area_cdk_mdtm	0.000378321	15799.8	0.440762	0.659392
ksads_p_si	smri_area_cdk_parahpal	-0.000176621	16836.1	-0.131801	0.895143
ksads_p_si	smri_area_cdk_paracn	-0.000213257	16096.2	-0.164662	0.869212
ksads_p_si	smri_area_cdk_parsopc	5.9929e-05	15714	0.0357259	0.971501
ksads_p_si	smri_area_cdk_parsobis	-0.00217143	16181.7	-1.85974	0.0629398
ksads_p_si	smri_area_cdk_parstgris	0.000154336	15970.9	0.0968037	0.922883
ksads_p_si	smri_area_cdk_pericc	0.000608456	16055.2	0.594627	0.552101
ksads_p_si	smri_area_cdk_postcn	4.61249e-05	16303.6	0.0441623	0.964776
ksads_p_si	smri_area_cdk_ptcate	0.00240501	15541.7	1.54568	0.122202
ksads_p_si	smri_area_cdk_precn	0.0021674	16631.5	2.34282	0.0191504
ksads_p_si	smri_area_cdk_pc	-0.000424667	16227.9	-0.491213	0.623282
ksads_p_si	smri_area_cdk_rracate	0.000393644	15997.2	0.195807	0.844764
ksads_p_si	smri_area_cdk_rrmdfr	-0.00155256	16189.3	-1.54835	0.121557
ksads_p_si	smri_area_cdk_sufr	0.000107312	16346.8	0.120784	0.903863
ksads_p_si	smri_area_cdk_supl	-0.00257312	16509.7	-2.34135	0.0192258
ksads_p_si	smri_area_cdk_sutm	0.000142543	15937	0.168097	0.866509
ksads_p_si	smri_area_cdk_sm	-0.00117629	16111.1	-0.732454	0.463902
ksads_p_si	smri_area_cdk_frpole	-0.00175228	17419.6	-1.18621	0.235554
ksads_p_si	smri_area_cdk_tmpole	0.00042219	17415.6	0.294852	0.76811
ksads_p_si	smri_area_cdk_trvtm	0.00122476	16166	0.897166	0.369644
ksads_p_si	smri_area_cdk_insula	0.000673964	17635.8	0.69701	0.485806
ksads_p_si	smri_thick_cdk_bankssts	-0.00116194	16209.3	-1.69375	0.090332
ksads_p_si	smri_thick_cdk_cdacate	0.00129599	16090.3	1.52773	0.1266
ksads_p_si	smri_thick_cdk_cdmdfr	-0.000424699	17201	-0.928174	0.35333
ksads_p_si	smri_thick_cdk_cuneus	0.000667572	16385.6	1.14678	0.25149
ksads_p_si	smri_thick_cdk_ehinal	-0.000686073	17694.5	-0.677594	0.498038
ksads_p_si	smri_thick_cdk_fusiform	-0.000188492	16493.9	-0.517966	0.604489
ksads_p_si	smri_thick_cdk_ifpl	-0.000301706	17180.5	-0.825231	0.409252
ksads_p_si	smri_thick_cdk_iftm	3.634e-05	16918.9	0.0854406	0.931912
ksads_p_si	smri_thick_cdk_ihcate	-0.000507683	16699.8	-0.797538	0.42515
ksads_p_si	smri_thick_cdk_locc	0.000431916	16304.1	1.15139	0.24959
ksads_p_si	smri_thick_cdk_lobfr	-0.000356508	17697.8	-0.786201	0.43176
ksads_p_si	smri_thick_cdk_lingual	-0.000865074	16564.6	-1.86955	0.061564
ksads_p_si	smri_thick_cdk_mobfr	0.00045888	17560.7	0.810045	0.417925
ksads_p_si	smri_thick_cdk_mdtm	-0.000966067	17201.4	-2.12296	0.0337716
ksads_p_si	smri_thick_cdk_parahpal	0.000318811	16317.3	0.425395	0.670554
ksads_p_si	smri_thick_cdk_paracn	-0.000231077	16886.6	-0.500483	0.616741
ksads_p_si	smri_thick_cdk_parsopc	-0.000521628	17121.3	-1.05813	0.290013
ksads_p_si	smri_thick_cdk_parsobis	0.000986739	17076.5	1.50089	0.133401
ksads_p_si	smri_thick_cdk_parstgris	4.3139e-05	17319.4	0.0830909	0.93378
ksads_p_si	smri_thick_cdk_pericc	0.000346819	16739.5	0.482854	0.629206
ksads_p_si	smri_thick_cdk_postcn	0.000385464	17316.1	0.770845	0.440809
ksads_p_si	smri_thick_cdk_ptcate	0.000287984	16506.1	0.530943	0.595465
ksads_p_si	smri_thick_cdk_precn	-0.000968502	17401.1	-2.05556	0.0398403
ksads_p_si	smri_thick_cdk_pc	0.000106663	16929.3	0.33743	0.735797
ksads_p_si	smri_thick_cdk_rracate	0.000553114	16976	0.695237	0.486916
ksads_p_si	smri_thick_cdk_rrmdfr	-0.000255209	17172	-0.675999	0.49905
ksads_p_si	smri_thick_cdk_sufr	-0.000530759	16947.3	-1.92301	0.0544949
ksads_p_si	smri_thick_cdk_supl	0.00027141	17161.5	0.873436	0.382438
ksads_p_si	smri_thick_cdk_sutm	-0.000484761	16725.6	-1.25705	0.208754
ksads_p_si	smri_thick_cdk_sm	-0.000931228	17350.5	-2.03266	0.0421021
ksads_p_si	smri_thick_cdk_frpole	0.000618999	17257.6	0.61319	0.539759
ksads_p_si	smri_thick_cdk_tmpole	-0.000597242	17734.3	-0.667623	0.504383
ksads_p_si	smri_thick_cdk_trvtm	-0.000500397	16713	-0.67019	0.502746
ksads_p_si	smri_thick_cdk_insula	-0.000113163	17724.5	-0.217957	0.827465
ksads_p_si	smri_vol_scs_cbwmatter	0.000376564	17680.3	1.99607	0.0459414
ksads_p_si	smri_vol_scs_ltventricle	-0.00423282	15394.1	-1.68468	0.0920702
ksads_p_si	smri_vol_scs_inflatvent	-0.0089477	16613.4	-2.02215	0.0431772
ksads_p_si	smri_vol_scs_crbwmatter	0.000220503	17597	0.256386	0.797656
ksads_p_si	smri_vol_scs_crbcortex	0.000282698	16679	0.857042	0.391434
ksads_p_si	smri_vol_scs_tp	-0.000875142	17749.8	-1.45042	0.146958
ksads_p_si	smri_vol_scs_caudate	0.000558423	16898.6	1.12915	0.258852
ksads_p_si	smri_vol_scs_putamen	-4.71522e-05	17753.9	-0.0879238	0.929938
ksads_p_si	smri_vol_scs_pallidum	0.000597091	17721.8	0.524783	0.59974
ksads_p_si	smri_vol_scs_hpus	0.000664202	17183.3	1.0763	0.281807
ksads_p_si	smri_vol_scs_amygdala	0.0010973	17367.6	1.06489	0.28694
ksads_p_si	smri_vol_scs_vedc	0.000376643	17545	0.793588	0.427446
ksads_y_dep	smri_area_cdk_bankssts	-0.00224727	13385.9	-0.994469	0.320013
ksads_y_dep	smri_area_cdk_cdacate	-0.00512128	13376.8	-1.50169	0.133201
ksads_y_dep	smri_area_cdk_cdmdfr	0.00487977	14192.3	2.18054	0.029234
ksads_y_dep	smri_area_cdk_cuneus	-0.000579611	13657	-0.429105	0.667854
ksads_y_dep	smri_area_cdk_ehinal	-0.00543614	15232.7	-1.872	0.0612252
ksads_y_dep	smri_area_cdk_fusiform	-0.000277243	13515.7	-0.230444	0.81775
ksads_y_dep	smri_area_cdk_ifpl	-0.00325672	13373.8	-2.05006	0.0403783
ksads_y_dep	smri_area_cdk_iftm	0.00119877	13812.3	0.858879	0.390422
ksads_y_dep	smri_area_cdk_ihcate	-0.000820309	14367.7	-0.443699	0.657267
ksads_y_dep	smri_area_cdk_locc	0.00048451	13343.6	0.394472	0.693239
ksads_y_dep	smri_area_cdk_lobfr	0.00043579	15135.9	0.38622	0.699339
ksads_y_dep	smri_area_cdk_lingual	9.53659e-05	13572.3	0.0796346	0.936529
ksads_y_dep	smri_area_cdk_mobfr	-0.00114976	15636.3	-0.801253	0.422997
ksads_y_dep	smri_area_cdk_mdtm	-0.0012864	13626.7	-1.16973	0.242129
ksads_y_dep	smri_area_cdk_parahpal	0.00205964	14790.8	1.18264	0.23697
ksads_y_dep	smri_area_cdk_paracn	-0.00254012	13929.7	-1.52619	0.126985
ksads_y_dep	smri_area_cdk_parsopc	0.00252424	13559.8	1.1759	0.239654
ksads_y_dep	smri_area_cdk_parsobis	0.000453377	14020.6	0.301668	0.762909
ksads_y_dep	smri_area_cdk_parstgris	0.00151699	13866.9	0.739293	0.459741
ksads_y_dep	smri_area_cdk_pericc	-0.00103232	13868.8	-0.785361	0.432256
ksads_y_dep	smri_area_cdk_postcn	-0.000653267	14188.4	-0.484188	0.62826
ksads_y_dep	smri_area_cdk_ptcate	0.000580836	13414	0.292725	0.769737
ksads_y_dep	smri_area_cdk_precn	-0.000364899	14580.5	-0.302576	0.762217
ksads_y_dep	smri_area_cdk_pc	-0.00104794	14105.6	-0.94092	0.346762
ksads_y_dep	smri_area_cdk_rracate	2.25662e-05	13857.9	0.00872124	0.993042
ksads_y_dep	smri_area_cdk_rrmdfr	-1.30518e-05	14015.3	-0.0101154	0.991929
ksads_y_dep	smri_area_cdk_sufr	0.00326674	14234.9	2.8467	0.0044238
ksads_y_dep	smri_area_cdk_supl	-0.000309065	14372.8	-0.217304	0.827975
ksads_y_dep	smri_area_cdk_sutm	0.000557513	13783.9	0.51288	0.608044
ksads_y_dep	smri_area_cdk_sm	0.0033317	13925.3	1.61749	0.105795
ksads_y_dep	smri_area_cdk_frpole	0.00264183	15674.7	1.35864	0.174279
ksads_y_dep	smri_area_cdk_tmpole	-0.00213051	15696.2	-1.13148	0.25787
ksads_y_dep	smri_area_cdk_trvtm	0.00269702	14062.4	1.53204	0.125535
ksads_y_dep	smri_area_cdk_insula	0.000497462	17410.1	0.380263	0.703755
ksads_y_dep	smri_thick_cdk_bankssts	0.000713025	14051.3	0.807827	0.419204
ksads_y_dep	smri_thick_cdk_cdacate	-0.000677429	13920.4	-0.621261	0.534438
ksads_y_dep	smri_thick_cdk_cdmdfr	-0.000913971	15267.1	-1.52518	0.127234
ksads_y_dep	smri_thick_cdk_cuneus	0.00056916	14256.7	0.756458	0.449387
ksads_y_dep	smri_thick_cdk_ehinal	0.000867329	16396.7	0.64358	0.519857
ksads_y_dep	smri_thick_cdk_fusiform	0.00114665	14389.7	2.43427	0.0149339
ksads_y_dep	smri_thick_cdk_ifpl	-0.000315407	15234.3	-0.659445	0.50962
ksads_y_dep	smri_thick_cdk_iftm	0.0008941	14869.5	1.61381	0.106589
ksads_y_dep	smri_thick_cdk_ihcate	0.000374794	14624.8	0.454213	0.649682
ksads_y_dep	smri_thick_cdk_locc	-7.77604e-06	14164.5	-0.0160688	0.98718
ksads_y_dep	smri_thick_cdk_lobfr	-0.000471471	16400.5	-0.782363	0.434013
ksads_y_dep	smri_thick_cdk_lingual	0.000554907	14431.4	0.925305	0.354823
ksads_y_dep	smri_thick_cdk_mobfr	-0.000196683	15970.2	-0.262951	0.792592
ksads_y_dep	smri_thick_cdk_mdtm	0.000277087	15295.4	0.464512	0.642288
ksads_y_dep	smri_thick_cdk_parahpal	0.00155149	14199.6	1.60259	0.109047
ksads_y_dep	smri_thick_cdk_paracn	-0.000288846	14788.2	-0.481434	0.630215
ksads_y_dep	smri_thick_cdk_parsopc	-0.00027611	15164.3	-0.428769	0.668098
ksads_y_dep	smri_thick_cdk_parsobis	-0.00032654	15107.2	-0.380022	0.703935
ksads_y_dep	smri_thick_cdk_parstgris	-0.000368833	15494.7	-0.539864	0.589298
ksads_y_dep	smri_thick_cdk_pericc	0.000396157	14635.3	0.424582	0.671148
ksads_y_dep	smri_thick_cdk_postcn	-0.000404477	15408.6	-0.616861	0.537335
ksads_y_dep	smri_thick_cdk_ptcate	0.000649001	14390.9	0.926152	0.354382
ksads_y_dep	smri_thick_cdk_precn	-0.000691995	15588.3	-1.11563	0.2646
ksads_y_dep	smri_thick_cdk_pc	0.000167208	14913.3	0.405684	0.684981
ksads_y_dep	smri_thick_cdk_rracate	-0.000825849	14978.9	-0.795723	0.426206
ksads_y_dep	smri_thick_cdk_rrmdfr	-0.000948374	15277.1	-1.91861	0.0550529
ksads_y_dep	smri_thick_cdk_sufr	-0.000188861	14927.5	-0.52508	0.599535
ksads_y_dep	smri_thick_cdk_supl	-0.000473788	15232.5	-1.16509	0.244001
ksads_y_dep	smri_thick_cdk_sutm	-2.12879e-05	14618.1	-0.042475	0.966121
ksads_y_dep	smri_thick_cdk_sm	-0.000496991	15453.7	-0.825622	0.409031
ksads_y_dep	smri_thick_cdk_frpole	-0.00183167	15390.2	-1.38227	0.166909
ksads_y_dep	smri_thick_cdk_tmpole	-0.000729903	16528.2	-0.612519	0.540203
ksads_y_dep	smri_thick_cdk_trvtm	-0.00154443	14624.5	-1.59335	0.111104
ksads_y_dep	smri_thick_cdk_insula	0.000260177	16517.9	0.376466	0.706575
ksads_y_dep	smri_vol_scs_cbwmatter	7.87893e-06	17207	0.0309164	0.975337
ksads_y_dep	smri_vol_scs_ltventricle	-0.0010528	13320.4	-0.328874	0.742256
ksads_y_dep	smri_vol_scs_inflatvent	-0.00861502	14543.3	-1.50121	0.133323
ksads_y_dep	smri_vol_scs_crbwmatter	-0.0010218	17427.8	-0.876185	0.380942
ksads_y_dep	smri_vol_scs_crbcortex	3.91137e-05	14455.4	0.0909179	0.927559
ksads_y_dep	smri_vol_scs_tp	-0.00164919	16740.8	-2.04583	0.0407886
ksads_y_dep	smri_vol_scs_caudate	8.87753e-05	14818.9	0.137467	0.890664
ksads_y_dep	smri_vol_scs_putamen	0.000537602	16848.7	0.744109	0.456821
ksads_y_dep	smri_vol_scs_pallidum	-0.00155617	17195.6	-1.01461	0.310308
ksads_y_dep	smri_vol_scs_hpus	0.000572372	15292.3	0.708992	0.47834
ksads_y_dep	smri_vol_scs_amygdala	0.001171	15574.2	0.865939	0.386537
ksads_y_dep	smri_vol_scs_vedc	0.000446516	17532	0.692742	0.488481
ksads_y_bp	smri_area_cdk_bankssts	0.00243735	13676.8	1.28609	0.198433
ksads_y_bp	smri_area_cdk_cdacate	0.00166793	13666.5	0.583088	0.559844
ksads_y_bp	smri_area_cdk_cdmdfr	0.000424479	14485.3	0.226377	0.820911
ksads_y_bp	smri_area_cdk_cuneus	-0.00148187	13951.2	-1.30875	0.190642
ksads_y_bp	smri_area_cdk_ehinal	0.00172397	15497.6	0.709675	0.477917
ksads_y_bp	smri_area_cdk_fusiform	0.00080813	13809	0.801089	0.423094
ksads_y_bp	smri_area_cdk_ifpl	-0.00153285	13670.3	-1.15013	0.250109
ksads_y_bp	smri_area_cdk_iftm	-0.00118795	14104.9	-1.01548	0.309896
ksads_y_bp	smri_area_cdk_ihcate	0.00168068	14653.4	1.0855	0.277719
ksads_y_bp	smri_area_cdk_locc	-0.000830252	13634.5	-0.805932	0.420296
ksads_y_bp	smri_area_cdk_lobfr	4.07459e-05	15402	0.0431671	0.965569
ksads_y_bp	smri_area_cdk_lingual	-0.000125139	13865.9	-0.124635	0.900814
ksads_y_bp	smri_area_cdk_mobfr	0.00138404	15881.1	1.1537	0.248642
ksads_y_bp	smri_area_cdk_mdtm	0.00109496	13918.9	1.18769	0.234977
ksads_y_bp	smri_area_cdk_parahpal	-0.000373105	15066.9	-0.25594	0.798001
ksads_y_bp	smri_area_cdk_paracn	0.000223421	14221.1	0.160189	0.872735
ksads_y_bp	smri_area_cdk_parsopc	-0.00122414	13851.2	-0.68013	0.496434
ksads_y_bp	smri_area_cdk_parsobis	0.000745865	14314.9	0.592345	0.553629
ksads_y_bp	smri_area_cdk_parstgris	0.0017367	14159	1.00984	0.312588
ksads_y_bp	smri_area_cdk_pericc	0.000236616	14163.6	0.214795	0.82993
ksads_y_bp	smri_area_cdk_postcn	0.000890357	14477.9	0.787843	0.430802
ksads_y_bp	smri_area_cdk_ptcate	0.00120885	13701.7	0.726386	0.467614
ksads_y_bp	smri_area_cdk_precn	-0.000750613	14865.6	-0.743484	0.4572
ksads_y_bp	smri_area_cdk_pc	-0.0012673	14395.4	-1.35823	0.174413
ksads_y_bp	smri_area_cdk_rracate	0.000466079	14151.5	0.214932	0.829823
ksads_y_bp	smri_area_cdk_rrmdfr	9.50424e-05	14309.4	0.0879172	0.929944
ksads_y_bp	smri_area_cdk_sufr	0.00163065	14524.9	1.69617	0.0898759
ksads_y_bp	smri_area_cdk_supl	0.000340395	14661.7	0.285799	0.775036
ksads_y_bp	smri_area_cdk_sutm	0.000978579	14072.3	1.07408	0.282803
ksads_y_bp	smri_area_cdk_sm	-0.000501088	14217.9	-0.29026	0.771621
ksads_y_bp	smri_area_cdk_frpole	0.000925728	15916.8	0.569511	0.569018
ksads_y_bp	smri_area_cdk_tmpole	0.00140767	15933.7	0.894295	0.371177
ksads_y_bp	smri_area_cdk_trvtm	4.13583e-05	14350.7	0.0280375	0.977633
ksads_y_bp	smri_area_cdk_insula	-0.000592522	17494.3	-0.543117	0.587056
ksads_y_bp	smri_thick_cdk_bankssts	0.000505264	14343.9	0.683232	0.494471
ksads_y_bp	smri_thick_cdk_cdacate	-0.00183203	14213.8	-2.00522	0.0449582
ksads_y_bp	smri_thick_cdk_cdmdfr	0.000414811	15532.6	0.827619	0.407899
ksads_y_bp	smri_thick_cdk_cuneus	-0.000175988	14546.8	-0.279271	0.780041
ksads_y_bp	smri_thick_cdk_ehinal	-0.00240858	16590.5	-2.14033	0.0323427
ksads_y_bp	smri_thick_cdk_fusiform	6.88215e-05	14676.3	0.174442	0.861521
ksads_y_bp	smri_thick_cdk_ifpl	-0.000511288	15499.5	-1.27817	0.20121
ksads_y_bp	smri_thick_cdk_iftm	-0.000225597	15146.6	-0.486596	0.626552
ksads_y_bp	smri_thick_cdk_ihcate	0.000303628	14904.8	0.439537	0.660279
ksads_y_bp	smri_thick_cdk_locc	0.000117826	14456.4	0.290663	0.771313
ksads_y_bp	smri_thick_cdk_lobfr	-0.000603868	16590.9	-1.19997	0.230167
ksads_y_bp	smri_thick_cdk_lingual	0.000254366	14721.2	0.50656	0.612471
ksads_y_bp	smri_thick_cdk_mobfr	8.44846e-05	16193.6	0.135177	0.892474
ksads_y_bp	smri_thick_cdk_mdtm	-0.000183657	15557.4	-0.368138	0.712776
ksads_y_bp	smri_thick_cdk_parahpal	0.00080581	14490.8	0.993562	0.320453
ksads_y_bp	smri_thick_cdk_paracn	-0.0013116	15070.2	-2.61258	0.00899496
ksads_y_bp	smri_thick_cdk_parsopc	-8.92214e-05	15430.1	-0.165628	0.868452
ksads_y_bp	smri_thick_cdk_parsobis	0.00031781	15375.3	0.442117	0.658411
ksads_y_bp	smri_thick_cdk_parstgris	0.000109214	15745.8	0.191195	0.848376
ksads_y_bp	smri_thick_cdk_pericc	0.0012369	14919.7	1.58374	0.113274
ksads_y_bp	smri_thick_cdk_postcn	-2.97645e-06	15665.1	-0.00542876	0.995669
ksads_y_bp	smri_thick_cdk_ptcate	-0.000142627	14677.7	-0.243023	0.807991
ksads_y_bp	smri_thick_cdk_precn	-0.000331644	15840.2	-0.639584	0.522453
ksads_y_bp	smri_thick_cdk_pc	-0.000662597	15191.7	-1.92121	0.0547245
ksads_y_bp	smri_thick_cdk_rracate	0.000277716	15251	0.319805	0.749121
ksads_y_bp	smri_thick_cdk_rrmdfr	-5.3913e-05	15536.1	-0.130398	0.896253
ksads_y_bp	smri_thick_cdk_sufr	-0.000529497	15202.2	-1.75945	0.0785215
ksads_y_bp	smri_thick_cdk_supl	-0.000105977	15496.7	-0.31157	0.755371
ksads_y_bp	smri_thick_cdk_sutm	-4.0481e-05	14904	-0.0964925	0.923131
ksads_y_bp	smri_thick_cdk_sm	0.000590963	15712.5	1.17428	0.2403
ksads_y_bp	smri_thick_cdk_frpole	0.00186897	15650.7	1.68668	0.0916843
ksads_y_bp	smri_thick_cdk_tmpole	-0.00139366	16706.8	-1.40088	0.16127
ksads_y_bp	smri_thick_cdk_trvtm	-0.000968474	14908.8	-1.19342	0.232726
ksads_y_bp	smri_thick_cdk_insula	0.00111607	16699.7	1.93424	0.0531
ksads_y_bp	smri_vol_scs_cbwmatter	0.000215336	17316.2	1.01293	0.311108
ksads_y_bp	smri_vol_scs_ltventricle	-0.00401723	13607	-1.49599	0.13468
ksads_y_bp	smri_vol_scs_inflatvent	-0.00352373	14829.5	-0.733285	0.463396
ksads_y_bp	smri_vol_scs_crbwmatter	0.000279625	17509.8	0.287535	0.773706
ksads_y_bp	smri_vol_scs_crbcortex	-0.000217784	14756.2	-0.604817	0.54531
ksads_y_bp	smri_vol_scs_tp	0.000789936	16901	1.17376	0.240508
ksads_y_bp	smri_vol_scs_caudate	-0.000260635	15099	-0.482276	0.629617
ksads_y_bp	smri_vol_scs_putamen	8.11851e-05	16998.4	0.134636	0.892901
ksads_y_bp	smri_vol_scs_pallidum	0.00027372	17306.1	0.213918	0.830614
ksads_y_bp	smri_vol_scs_hpus	0.00198365	15551.2	2.93834	0.00330456
ksads_y_bp	smri_vol_scs_amygdala	-0.00128228	15823.1	-1.13412	0.256761
[truncated: 323 more rows]

## Sheet: SM Table 4
VarName	PC1	PC2	PC3	PC4
dmdtifp1_19	0.37955	0.609032	0.695734	-0.0312376
dmdtifp1_61	-0.606804	0.339165	0.00186188	-0.718855
dmdtifp1_103	-0.261989	0.677375	-0.425806	0.539643
dmdtifp1_145	-0.647373	-0.23497	0.578481	0.437101
Explained	0.501659	0.467797	0.029273	0.00127149

## Sheet: SM Table 5
A	B	ChiSquare	DF	RMSEA	RMSEA_CI_Lower	RMSEA_CI_Upper	CFI	TLI	SRMR
smri_area_cdk_bankssts	dmdtifp1_pc1	0	0	0	0	0	1	1	2.08773e-09
smri_area_cdk_cdacate	dmdtifp1_pc1	6.06626e-12	0	0	0	0	1	1	6.58291e-09
smri_area_cdk_cdmdfr	dmdtifp1_pc1	0	0	0	0	0	1	1	3.40181e-09
smri_area_cdk_cuneus	dmdtifp1_pc1	0	0	0	0	0	1	1	1.82407e-09
smri_area_cdk_ehinal	dmdtifp1_pc1	6.06626e-12	0	0	0	0	1	1	1.7883e-08
smri_area_cdk_fusiform	dmdtifp1_pc1	0	0	0	0	0	1	1	5.58537e-09
smri_area_cdk_ifpl	dmdtifp1_pc1	0	0	0	0	0	1	1	1.37792e-09
smri_area_cdk_iftm	dmdtifp1_pc1	0	0	0	0	0	1	1	8.32771e-09
smri_area_cdk_ihcate	dmdtifp1_pc1	1.21325e-11	0	0	0	0	1	1	2.88216e-08
smri_area_cdk_locc	dmdtifp1_pc1	0	0	0	0	0	1	1	1.02695e-09
smri_area_cdk_lobfr	dmdtifp1_pc1	0	0	0	0	0	1	1	5.59765e-09
smri_area_cdk_lingual	dmdtifp1_pc1	0	0	0	0	0	1	1	3.38302e-09
smri_area_cdk_mobfr	dmdtifp1_pc1	1.21325e-11	0	0	0	0	1	1	1.14729e-08
smri_area_cdk_mdtm	dmdtifp1_pc1	0	0	0	0	0	1	1	3.03155e-09
smri_area_cdk_parahpal	dmdtifp1_pc1	0	0	0	0	0	1	1	5.24623e-09
smri_area_cdk_paracn	dmdtifp1_pc1	6.06626e-12	0	0	0	0	1	1	5.55026e-09
smri_area_cdk_parsopc	dmdtifp1_pc1	0	0	0	0	0	1	1	5.46313e-09
smri_area_cdk_parsobis	dmdtifp1_pc1	0	0	0	0	0	1	1	7.16297e-10
smri_area_cdk_parstgris	dmdtifp1_pc1	0	0	0	0	0	1	1	7.70144e-09
smri_area_cdk_pericc	dmdtifp1_pc1	0	0	0	0	0	1	1	2.00755e-09
smri_area_cdk_postcn	dmdtifp1_pc1	1.21325e-11	0	0	0	0	1	1	6.92276e-09
smri_area_cdk_ptcate	dmdtifp1_pc1	0	0	0	0	0	1	1	2.30433e-09
smri_area_cdk_precn	dmdtifp1_pc1	6.06626e-12	0	0	0	0	1	1	3.25296e-09
smri_area_cdk_pc	dmdtifp1_pc1	1.21325e-11	0	0	0	0	1	1	1.19124e-08
smri_area_cdk_rracate	dmdtifp1_pc1	1.21325e-11	0	0	0	0	1	1	6.83965e-09
smri_area_cdk_rrmdfr	dmdtifp1_pc1	2.4265e-11	0	0	0	0	1	1	1.74791e-08
smri_area_cdk_sufr	dmdtifp1_pc1	0	0	0	0	0	1	1	2.14797e-09
smri_area_cdk_supl	dmdtifp1_pc1	0	0	0	0	0	1	1	3.95338e-09
smri_area_cdk_sutm	dmdtifp1_pc1	1.21325e-11	0	0	0	0	1	1	4.04072e-09
smri_area_cdk_sm	dmdtifp1_pc1	0	0	0	0	0	1	1	1.02752e-08
smri_area_cdk_frpole	dmdtifp1_pc1	0	0	0	0	0	1	1	7.40494e-09
smri_area_cdk_tmpole	dmdtifp1_pc1	0	0	0	0	0	1	1	1.55593e-09
smri_area_cdk_trvtm	dmdtifp1_pc1	0	0	0	0	0	1	1	1.37643e-09
smri_area_cdk_insula	dmdtifp1_pc1	1.81988e-11	0	0	0	0	1	1	1.67443e-08
smri_thick_cdk_bankssts	dmdtifp1_pc1	0	0	0	0	0	1	1	4.52261e-09
smri_thick_cdk_cdacate	dmdtifp1_pc1	0	0	0	0	0	1	1	1.13864e-09
smri_thick_cdk_cdmdfr	dmdtifp1_pc1	1.21325e-11	0	0	0	0	1	1	6.48364e-09
smri_thick_cdk_cuneus	dmdtifp1_pc1	0	0	0	0	0	1	1	6.24129e-10
smri_thick_cdk_ehinal	dmdtifp1_pc1	6.06626e-12	0	0	0	0	1	1	4.31781e-09
smri_thick_cdk_fusiform	dmdtifp1_pc1	6.06626e-12	0	0	0	0	1	1	5.39178e-09
smri_thick_cdk_ifpl	dmdtifp1_pc1	1.21325e-11	0	0	0	0	1	1	1.25304e-08
smri_thick_cdk_iftm	dmdtifp1_pc1	1.21325e-11	0	0	0	0	1	1	1.55546e-08
smri_thick_cdk_ihcate	dmdtifp1_pc1	2.4265e-11	0	0	0	0	1	1	1.37434e-08
smri_thick_cdk_locc	dmdtifp1_pc1	0	0	0	0	0	1	1	6.43314e-09
smri_thick_cdk_lobfr	dmdtifp1_pc1	1.21325e-11	0	0	0	0	1	1	1.4156e-09
smri_thick_cdk_lingual	dmdtifp1_pc1	6.06626e-12	0	0	0	0	1	1	1.14576e-08
smri_thick_cdk_mobfr	dmdtifp1_pc1	1.21325e-11	0	0	0	0	1	1	1.50718e-08
smri_thick_cdk_mdtm	dmdtifp1_pc1	1.21325e-11	0	0	0	0	1	1	9.87171e-09
smri_thick_cdk_parahpal	dmdtifp1_pc1	6.06626e-12	0	0	0	0	1	1	1.01063e-08
smri_thick_cdk_paracn	dmdtifp1_pc1	6.06626e-12	0	0	0	0	1	1	4.3901e-09
smri_thick_cdk_parsopc	dmdtifp1_pc1	1.21325e-11	0	0	0	0	1	1	1.61094e-08
smri_thick_cdk_parsobis	dmdtifp1_pc1	1.21325e-11	0	0	0	0	1	1	3.26243e-09
smri_thick_cdk_parstgris	dmdtifp1_pc1	2.4265e-11	0	0	0	0	1	1	1.67658e-08
smri_thick_cdk_pericc	dmdtifp1_pc1	1.81988e-11	0	0	0	0	1	1	1.51749e-08
smri_thick_cdk_postcn	dmdtifp1_pc1	2.4265e-11	0	0	0	0	1	1	2.17309e-08
smri_thick_cdk_ptcate	dmdtifp1_pc1	0	0	0	0	0	1	1	4.45642e-09
smri_thick_cdk_precn	dmdtifp1_pc1	0	0	0	0	0	1	1	6.44834e-09
smri_thick_cdk_pc	dmdtifp1_pc1	1.21325e-11	0	0	0	0	1	1	6.80041e-09
smri_thick_cdk_rracate	dmdtifp1_pc1	1.21325e-11	0	0	0	0	1	1	9.83707e-09
smri_thick_cdk_rrmdfr	dmdtifp1_pc1	6.06626e-12	0	0	0	0	1	1	2.51737e-08
smri_thick_cdk_sufr	dmdtifp1_pc1	6.06626e-12	0	0	0	0	1	1	1.00613e-08
smri_thick_cdk_supl	dmdtifp1_pc1	2.4265e-11	0	0	0	0	1	1	1.73805e-08
smri_thick_cdk_sutm	dmdtifp1_pc1	0	0	0	0	0	1	1	1.23797e-08
smri_thick_cdk_sm	dmdtifp1_pc1	6.06626e-12	0	0	0	0	1	1	5.18172e-09
smri_thick_cdk_frpole	dmdtifp1_pc1	1.21325e-11	0	0	0	0	1	1	2.73624e-08
smri_thick_cdk_tmpole	dmdtifp1_pc1	0	0	0	0	0	1	1	6.69765e-09
smri_thick_cdk_trvtm	dmdtifp1_pc1	0	0	0	0	0	1	1	9.50176e-10
smri_thick_cdk_insula	dmdtifp1_pc1	0	0	0	0	0	1	1	6.00152e-09
smri_vol_scs_cbwmatter	dmdtifp1_pc1	1.81988e-11	0	0	0	0	1	1	1.83024e-08
smri_vol_scs_ltventricle	dmdtifp1_pc1	0	0	0	0	0	1	1	2.22165e-09
smri_vol_scs_inflatvent	dmdtifp1_pc1	1.21325e-11	0	0	0	0	1	1	2.33466e-08
smri_vol_scs_crbwmatter	dmdtifp1_pc1	0	0	0	0	0	1	1	8.41754e-10
smri_vol_scs_crbcortex	dmdtifp1_pc1	1.81988e-11	0	0	0	0	1	1	2.10655e-08
smri_vol_scs_tp	dmdtifp1_pc1	0	0	0	0	0	1	1	7.16364e-09
smri_vol_scs_caudate	dmdtifp1_pc1	0	0	0	0	0	1	1	2.72278e-09
smri_vol_scs_putamen	dmdtifp1_pc1	0	0	0	0	0	1	1	6.01145e-09
smri_vol_scs_pallidum	dmdtifp1_pc1	0	0	0	0	0	1	1	6.31615e-10
smri_vol_scs_hpus	dmdtifp1_pc1	1.21325e-11	0	0	0	0	1	1	1.43652e-08
smri_vol_scs_amygdala	dmdtifp1_pc1	0	0	0	0	0	1	1	5.27661e-09
smri_vol_scs_vedc	dmdtifp1_pc1	6.06626e-12	0	0	0	0	1	1	1.06699e-08

## Sheet: SM Table 6
A	B	path	est	se	z	pvalue	std.lv	std.all
smri_area_cdk_bankssts	dmdtifp1_pc1	A_2y~A_bl	0.925681	0.00457614	202.284	0	0.925681	0.925681
smri_area_cdk_bankssts	dmdtifp1_pc1	B_2y~B_bl	0.742186	0.00811014	91.5134	0	0.742186	0.742186
smri_area_cdk_bankssts	dmdtifp1_pc1	A_2y~B_bl	0.00414454	0.00457614	0.905686	0.365102	0.00414454	0.00414454
smri_area_cdk_bankssts	dmdtifp1_pc1	B_2y~A_bl	-0.00102915	0.00811014	-0.126897	0.899022	-0.00102915	-0.00102915
smri_area_cdk_bankssts	dmdtifp1_pc1	A_bl~~B_bl	0.011754	0.0120992	0.971473	0.331313	0.011754	0.0117557
smri_area_cdk_bankssts	dmdtifp1_pc1	A_2y~~B_2y	0.00114419	0.00306633	0.373146	0.70904	0.00114419	0.00451516
smri_area_cdk_bankssts	dmdtifp1_pc1	A_2y~~A_2y	0.142987	0.00244681	58.438	0	0.142987	0.143008
smri_area_cdk_bankssts	dmdtifp1_pc1	B_2y~~B_2y	0.449111	0.00768525	58.438	0	0.449111	0.449176
smri_area_cdk_bankssts	dmdtifp1_pc1	A_bl~~A_bl	0.999854	0.0171096	58.438	0	0.999854	1
smri_area_cdk_bankssts	dmdtifp1_pc1	B_bl~~B_bl	0.999854	0.0171096	58.438	0	0.999854	1
smri_area_cdk_cdacate	dmdtifp1_pc1	A_2y~A_bl	0.952744	0.0036755	259.215	0	0.952744	0.952744
smri_area_cdk_cdacate	dmdtifp1_pc1	B_2y~B_bl	0.74219	0.00810905	91.5261	0	0.74219	0.74219
smri_area_cdk_cdacate	dmdtifp1_pc1	A_2y~B_bl	0.00584587	0.0036755	1.5905	0.111723	0.00584587	0.00584587
smri_area_cdk_cdacate	dmdtifp1_pc1	B_2y~A_bl	0.00779017	0.00810905	0.960676	0.336715	0.00779017	0.00779017
smri_area_cdk_cdacate	dmdtifp1_pc1	A_bl~~B_bl	-0.00203491	0.0120984	-0.168197	0.866428	-0.00203491	-0.00203521
smri_area_cdk_cdacate	dmdtifp1_pc1	A_2y~~B_2y	-0.000812877	0.00246283	-0.330058	0.741356	-0.000812877	-0.00399377
smri_area_cdk_cdacate	dmdtifp1_pc1	A_2y~~A_2y	0.0922546	0.00157868	58.438	0	0.0922546	0.0922682
smri_area_cdk_cdacate	dmdtifp1_pc1	B_2y~~B_2y	0.449051	0.00768423	58.438	0	0.449051	0.449117
smri_area_cdk_cdacate	dmdtifp1_pc1	A_bl~~A_bl	0.999854	0.0171096	58.438	0	0.999854	1
smri_area_cdk_cdacate	dmdtifp1_pc1	B_bl~~B_bl	0.999854	0.0171096	58.438	0	0.999854	1
smri_area_cdk_cdmdfr	dmdtifp1_pc1	A_2y~A_bl	0.89049	0.00550526	161.753	0	0.89049	0.89049
smri_area_cdk_cdmdfr	dmdtifp1_pc1	B_2y~B_bl	0.742187	0.00810943	91.5215	0	0.742187	0.742187
smri_area_cdk_cdmdfr	dmdtifp1_pc1	A_2y~B_bl	0.0030953	0.00550526	0.562244	0.57395	0.0030953	0.0030953
smri_area_cdk_cdmdfr	dmdtifp1_pc1	B_2y~A_bl	-0.00458344	0.00810943	-0.565198	0.571939	-0.00458344	-0.00458344
smri_area_cdk_cdmdfr	dmdtifp1_pc1	A_bl~~B_bl	0.00286703	0.0120984	0.236976	0.812675	0.00286703	0.00286745
smri_area_cdk_cdmdfr	dmdtifp1_pc1	A_2y~~B_2y	-0.00393426	0.00368933	-1.06639	0.286248	-0.00393426	-0.0129045
smri_area_cdk_cdmdfr	dmdtifp1_pc1	A_2y~~A_2y	0.206971	0.00354172	58.438	0	0.206971	0.207001
smri_area_cdk_cdmdfr	dmdtifp1_pc1	B_2y~~B_2y	0.449091	0.00768491	58.438	0	0.449091	0.449157
smri_area_cdk_cdmdfr	dmdtifp1_pc1	A_bl~~A_bl	0.999854	0.0171096	58.438	0	0.999854	1
smri_area_cdk_cdmdfr	dmdtifp1_pc1	B_bl~~B_bl	0.999854	0.0171096	58.438	0	0.999854	1
smri_area_cdk_cuneus	dmdtifp1_pc1	A_2y~A_bl	0.886866	0.00559119	158.618	0	0.886866	0.886866
smri_area_cdk_cuneus	dmdtifp1_pc1	B_2y~B_bl	0.742122	0.00810972	91.5102	0	0.742122	0.742122
smri_area_cdk_cuneus	dmdtifp1_pc1	A_2y~B_bl	0.00170547	0.00559119	0.305028	0.760345	0.00170547	0.00170547
smri_area_cdk_cuneus	dmdtifp1_pc1	B_2y~A_bl	-0.00536087	0.00810972	-0.661043	0.508584	-0.00536087	-0.00536087
smri_area_cdk_cuneus	dmdtifp1_pc1	A_bl~~B_bl	-0.00979825	0.0120989	-0.809844	0.41803	-0.00979825	-0.00979968
smri_area_cdk_cuneus	dmdtifp1_pc1	A_2y~~B_2y	-0.00881953	0.00374793	-2.35318	0.0186139	-0.00881953	-0.0284852
smri_area_cdk_cuneus	dmdtifp1_pc1	A_2y~~A_2y	0.213464	0.00365283	58.438	0	0.213464	0.213495
smri_area_cdk_cuneus	dmdtifp1_pc1	B_2y~~B_2y	0.449083	0.00768478	58.438	0	0.449083	0.449149
smri_area_cdk_cuneus	dmdtifp1_pc1	A_bl~~A_bl	0.999854	0.0171096	58.438	0	0.999854	1
smri_area_cdk_cuneus	dmdtifp1_pc1	B_bl~~B_bl	0.999854	0.0171096	58.438	0	0.999854	1
smri_area_cdk_ehinal	dmdtifp1_pc1	A_2y~A_bl	0.706221	0.00856578	82.4468	0	0.706221	0.706221
smri_area_cdk_ehinal	dmdtifp1_pc1	B_2y~B_bl	0.742227	0.00810947	91.5259	0	0.742227	0.742227
smri_area_cdk_ehinal	dmdtifp1_pc1	A_2y~B_bl	-0.00783347	0.00856578	-0.914508	0.36045	-0.00783347	-0.00783347
smri_area_cdk_ehinal	dmdtifp1_pc1	B_2y~A_bl	0.00647616	0.00810947	0.798592	0.424527	0.00647616	0.00647616
smri_area_cdk_ehinal	dmdtifp1_pc1	A_bl~~B_bl	-0.00812777	0.0120987	-0.671786	0.50172	-0.00812777	-0.00812896
smri_area_cdk_ehinal	dmdtifp1_pc1	A_2y~~B_2y	0.00772033	0.00574031	1.34493	0.178647	0.00772033	0.016276
smri_area_cdk_ehinal	dmdtifp1_pc1	A_2y~~A_2y	0.501028	0.00857366	58.438	0	0.501028	0.501101
smri_area_cdk_ehinal	dmdtifp1_pc1	B_2y~~B_2y	0.44907	0.00768455	58.438	0	0.44907	0.449136
smri_area_cdk_ehinal	dmdtifp1_pc1	A_bl~~A_bl	0.999854	0.0171096	58.438	0	0.999854	1
smri_area_cdk_ehinal	dmdtifp1_pc1	B_bl~~B_bl	0.999854	0.0171096	58.438	0	0.999854	1
smri_area_cdk_fusiform	dmdtifp1_pc1	A_2y~A_bl	0.928919	0.00448143	207.282	0	0.928919	0.928919
smri_area_cdk_fusiform	dmdtifp1_pc1	B_2y~B_bl	0.742034	0.00810992	91.497	0	0.742034	0.742034
smri_area_cdk_fusiform	dmdtifp1_pc1	A_2y~B_bl	0.000851171	0.00448143	0.189933	0.849362	0.000851171	0.000851171
smri_area_cdk_fusiform	dmdtifp1_pc1	B_2y~A_bl	-0.00880034	0.00810992	-1.08513	0.277863	-0.00880034	-0.00880034
smri_area_cdk_fusiform	dmdtifp1_pc1	A_bl~~B_bl	-0.0159809	0.0120999	-1.32074	0.186587	-0.0159809	-0.0159832
smri_area_cdk_fusiform	dmdtifp1_pc1	A_2y~~B_2y	-0.00507746	0.00300303	-1.69078	0.0908795	-0.00507746	-0.0204629
smri_area_cdk_fusiform	dmdtifp1_pc1	A_2y~~A_2y	0.137113	0.00234631	58.438	0	0.137113	0.137134
smri_area_cdk_fusiform	dmdtifp1_pc1	B_2y~~B_2y	0.449034	0.00768394	58.438	0	0.449034	0.4491
smri_area_cdk_fusiform	dmdtifp1_pc1	A_bl~~A_bl	0.999854	0.0171096	58.438	0	0.999854	1
smri_area_cdk_fusiform	dmdtifp1_pc1	B_bl~~B_bl	0.999854	0.0171096	58.438	0	0.999854	1
smri_area_cdk_ifpl	dmdtifp1_pc1	A_2y~A_bl	0.944125	0.00398832	236.723	0	0.944125	0.944125
smri_area_cdk_ifpl	dmdtifp1_pc1	B_2y~B_bl	0.742138	0.0081099	91.5101	0	0.742138	0.742138
smri_area_cdk_ifpl	dmdtifp1_pc1	A_2y~B_bl	-0.000204207	0.00398832	-0.0512014	0.959165	-0.000204207	-0.000204207
smri_area_cdk_ifpl	dmdtifp1_pc1	B_2y~A_bl	0.00357058	0.0081099	0.440274	0.659738	0.00357058	0.00357058
smri_area_cdk_ifpl	dmdtifp1_pc1	A_bl~~B_bl	0.0102616	0.012099	0.848136	0.396362	0.0102616	0.0102631
smri_area_cdk_ifpl	dmdtifp1_pc1	A_2y~~B_2y	-0.00116012	0.00267246	-0.434102	0.664215	-0.00116012	-0.00525276
smri_area_cdk_ifpl	dmdtifp1_pc1	A_2y~~A_2y	0.108615	0.00185864	58.438	0	0.108615	0.108631
smri_area_cdk_ifpl	dmdtifp1_pc1	B_2y~~B_2y	0.449099	0.00768505	58.438	0	0.449099	0.449165
smri_area_cdk_ifpl	dmdtifp1_pc1	A_bl~~A_bl	0.999854	0.0171096	58.438	0	0.999854	1
smri_area_cdk_ifpl	dmdtifp1_pc1	B_bl~~B_bl	0.999854	0.0171096	58.438	0	0.999854	1
smri_area_cdk_iftm	dmdtifp1_pc1	A_2y~A_bl	0.933173	0.00434417	214.811	0	0.933173	0.933174
smri_area_cdk_iftm	dmdtifp1_pc1	B_2y~B_bl	0.741966	0.00811191	91.4662	0	0.741966	0.741966
smri_area_cdk_iftm	dmdtifp1_pc1	A_2y~B_bl	-0.00680191	0.00434417	-1.56576	0.117406	-0.00680191	-0.00680191
smri_area_cdk_iftm	dmdtifp1_pc1	B_2y~A_bl	-0.00782973	0.00811191	-0.965214	0.334438	-0.00782973	-0.00782973
smri_area_cdk_iftm	dmdtifp1_pc1	A_bl~~B_bl	-0.0266321	0.0121026	-2.20052	0.0277702	-0.0266321	-0.026636
smri_area_cdk_iftm	dmdtifp1_pc1	A_2y~~B_2y	0.00154874	0.00290989	0.532233	0.594564	0.00154874	0.00644022
smri_area_cdk_iftm	dmdtifp1_pc1	A_2y~~A_2y	0.128784	0.00220377	58.438	0	0.128784	0.128803
smri_area_cdk_iftm	dmdtifp1_pc1	B_2y~~B_2y	0.44905	0.00768422	58.438	0	0.44905	0.449116
smri_area_cdk_iftm	dmdtifp1_pc1	A_bl~~A_bl	0.999854	0.0171096	58.438	0	0.999854	1
smri_area_cdk_iftm	dmdtifp1_pc1	B_bl~~B_bl	0.999854	0.0171096	58.438	0	0.999854	1
smri_area_cdk_ihcate	dmdtifp1_pc1	A_2y~A_bl	0.867017	0.00603213	143.733	0	0.867017	0.867017
smri_area_cdk_ihcate	dmdtifp1_pc1	B_2y~B_bl	0.742058	0.00811081	91.49	0	0.742058	0.742058
smri_area_cdk_ihcate	dmdtifp1_pc1	A_2y~B_bl	-0.0049937	0.00603213	-0.827849	0.407756	-0.0049937	-0.0049937
smri_area_cdk_ihcate	dmdtifp1_pc1	B_2y~A_bl	0.00596374	0.00811081	0.735282	0.462168	0.00596374	0.00596374
smri_area_cdk_ihcate	dmdtifp1_pc1	A_bl~~B_bl	0.0195246	0.0121007	1.61352	0.106632	0.0195246	0.0195275
smri_area_cdk_ihcate	dmdtifp1_pc1	A_2y~~B_2y	-0.00673718	0.00404208	-1.66676	0.0955616	-0.00673718	-0.0201721
smri_area_cdk_ihcate	dmdtifp1_pc1	A_2y~~A_2y	0.24839	0.00425048	58.438	0	0.24839	0.248426
smri_area_cdk_ihcate	dmdtifp1_pc1	B_2y~~B_2y	0.449076	0.00768466	58.438	0	0.449076	0.449142
smri_area_cdk_ihcate	dmdtifp1_pc1	A_bl~~A_bl	0.999854	0.0171096	58.438	0	0.999854	1
smri_area_cdk_ihcate	dmdtifp1_pc1	B_bl~~B_bl	0.999854	0.0171096	58.438	0	0.999854	1
smri_area_cdk_locc	dmdtifp1_pc1	A_2y~A_bl	0.954353	0.00361356	264.104	0	0.954353	0.954353
smri_area_cdk_locc	dmdtifp1_pc1	B_2y~B_bl	0.74257	0.00811472	91.509	0	0.74257	0.74257
smri_area_cdk_locc	dmdtifp1_pc1	A_2y~B_bl	-0.00209493	0.00361356	-0.579742	0.562089	-0.00209493	-0.00209493
smri_area_cdk_locc	dmdtifp1_pc1	B_2y~A_bl	0.0102313	0.00811472	1.26083	0.20737	0.0102313	0.0102313
smri_area_cdk_locc	dmdtifp1_pc1	A_bl~~B_bl	-0.0386873	0.0121074	-3.19534	0.00139665	-0.0386873	-0.038693
smri_area_cdk_locc	dmdtifp1_pc1	A_2y~~B_2y	-0.00353952	0.00241976	-1.46276	0.143534	-0.00353952	-0.0177023
smri_area_cdk_locc	dmdtifp1_pc1	A_2y~~A_2y	0.0890381	0.00152363	58.438	0	0.0890381	0.0890511
smri_area_cdk_locc	dmdtifp1_pc1	B_2y~~B_2y	0.449007	0.00768348	58.438	0	0.449007	0.449073
smri_area_cdk_locc	dmdtifp1_pc1	A_bl~~A_bl	0.999854	0.0171096	58.438	0	0.999854	1
smri_area_cdk_locc	dmdtifp1_pc1	B_bl~~B_bl	0.999854	0.0171096	58.438	0	0.999854	1
smri_area_cdk_lobfr	dmdtifp1_pc1	A_2y~A_bl	0.605863	0.00966834	62.6647	0	0.605863	0.605863
smri_area_cdk_lobfr	dmdtifp1_pc1	B_2y~B_bl	0.738878	0.00830764	88.9396	0	0.738878	0.738878
smri_area_cdk_lobfr	dmdtifp1_pc1	A_2y~B_bl	0.0735706	0.00966834	7.60944	2.75335e-14	0.0735706	0.0735706
smri_area_cdk_lobfr	dmdtifp1_pc1	B_2y~A_bl	0.0151116	0.00830764	1.819	0.0689122	0.0151116	0.0151116
smri_area_cdk_lobfr	dmdtifp1_pc1	A_bl~~B_bl	0.218081	0.0123828	17.6116	0	0.218081	0.218113
smri_area_cdk_lobfr	dmdtifp1_pc1	A_2y~~B_2y	0.0146516	0.00632381	2.3169	0.020509	0.0146516	0.0280458
smri_area_cdk_lobfr	dmdtifp1_pc1	A_2y~~A_2y	0.607984	0.0104039	58.438	0	0.607984	0.608073
smri_area_cdk_lobfr	dmdtifp1_pc1	B_2y~~B_2y	0.448894	0.00768155	58.438	0	0.448894	0.44896
smri_area_cdk_lobfr	dmdtifp1_pc1	A_bl~~A_bl	0.999854	0.0171096	58.438	0	0.999854	1
smri_area_cdk_lobfr	dmdtifp1_pc1	B_bl~~B_bl	0.999854	0.0171096	58.438	0	0.999854	1
smri_area_cdk_lingual	dmdtifp1_pc1	A_2y~A_bl	0.930741	0.0044198	210.584	0	0.930741	0.930741
smri_area_cdk_lingual	dmdtifp1_pc1	B_2y~B_bl	0.74271	0.00810907	91.59	0	0.74271	0.74271
smri_area_cdk_lingual	dmdtifp1_pc1	A_2y~B_bl	-0.00691244	0.0044198	-1.56397	0.117825	-0.00691244	-0.00691244
smri_area_cdk_lingual	dmdtifp1_pc1	B_2y~A_bl	0.0197221	0.00810907	2.4321	0.0150114	0.0197221	0.0197221
smri_area_cdk_lingual	dmdtifp1_pc1	A_bl~~B_bl	-0.027185	0.0121028	-2.24617	0.024693	-0.027185	-0.027189
smri_area_cdk_lingual	dmdtifp1_pc1	A_2y~~B_2y	-0.00380674	0.00295973	-1.28618	0.198381	-0.00380674	-0.0155648
smri_area_cdk_lingual	dmdtifp1_pc1	A_2y~~A_2y	0.133304	0.00228111	58.438	0	0.133304	0.133323
smri_area_cdk_lingual	dmdtifp1_pc1	B_2y~~B_2y	0.448723	0.00767862	58.438	0	0.448723	0.448789
smri_area_cdk_lingual	dmdtifp1_pc1	A_bl~~A_bl	0.999854	0.0171096	58.438	0	0.999854	1
smri_area_cdk_lingual	dmdtifp1_pc1	B_bl~~B_bl	0.999854	0.0171096	58.438	0	0.999854	1
smri_area_cdk_mobfr	dmdtifp1_pc1	A_2y~A_bl	0.654737	0.00915498	71.517	0	0.654737	0.654737
smri_area_cdk_mobfr	dmdtifp1_pc1	B_2y~B_bl	0.741541	0.00812672	91.2473	0	0.741541	0.741541
smri_area_cdk_mobfr	dmdtifp1_pc1	A_2y~B_bl	-0.0138698	0.00915498	-1.515	0.129772	-0.0138698	-0.0138698
smri_area_cdk_mobfr	dmdtifp1_pc1	B_2y~A_bl	-0.00952866	0.00812672	-1.17251	0.240992	-0.00952866	-0.00952866
smri_area_cdk_mobfr	dmdtifp1_pc1	A_bl~~B_bl	-0.0664189	0.012125	-5.47784	4.30553e-08	-0.0664189	-0.0664286
smri_area_cdk_mobfr	dmdtifp1_pc1	A_2y~~B_2y	0.0057534	0.00612106	0.939935	0.347251	0.0057534	0.0113741
smri_area_cdk_mobfr	dmdtifp1_pc1	A_2y~~A_2y	0.569838	0.00975115	58.438	0	0.569838	0.569921
smri_area_cdk_mobfr	dmdtifp1_pc1	B_2y~~B_2y	0.449021	0.00768372	58.438	0	0.449021	0.449087
smri_area_cdk_mobfr	dmdtifp1_pc1	A_bl~~A_bl	0.999854	0.0171096	58.438	0	0.999854	1
smri_area_cdk_mobfr	dmdtifp1_pc1	B_bl~~B_bl	0.999854	0.0171096	58.438	0	0.999854	1
smri_area_cdk_mdtm	dmdtifp1_pc1	A_2y~A_bl	0.897156	0.00534849	167.74	0	0.897156	0.897156
smri_area_cdk_mdtm	dmdtifp1_pc1	B_2y~B_bl	0.742426	0.00811148	91.5278	0	0.742426	0.742426
smri_area_cdk_mdtm	dmdtifp1_pc1	A_2y~B_bl	-0.00316434	0.00534849	-0.591632	0.554097	-0.00316434	-0.00316434
smri_area_cdk_mdtm	dmdtifp1_pc1	B_2y~A_bl	-0.00969328	0.00811148	-1.19501	0.232084	-0.00969328	-0.00969328
smri_area_cdk_mdtm	dmdtifp1_pc1	A_bl~~B_bl	0.0259884	0.0121024	2.14737	0.0317637	0.0259884	0.0259922
smri_area_cdk_mdtm	dmdtifp1_pc1	A_2y~~B_2y	-7.63908e-05	0.00358249	-0.0213234	0.982988	-7.63908e-05	-0.000258016
smri_area_cdk_mdtm	dmdtifp1_pc1	A_2y~~A_2y	0.195221	0.00334065	58.438	0	0.195221	0.19525
smri_area_cdk_mdtm	dmdtifp1_pc1	B_2y~~B_2y	0.449018	0.00768366	58.438	0	0.449018	0.449084
smri_area_cdk_mdtm	dmdtifp1_pc1	A_bl~~A_bl	0.999854	0.0171096	58.438	0	0.999854	1
smri_area_cdk_mdtm	dmdtifp1_pc1	B_bl~~B_bl	0.999854	0.0171096	58.438	0	0.999854	1
smri_area_cdk_parahpal	dmdtifp1_pc1	A_2y~A_bl	0.774762	0.00765034	101.272	0	0.774762	0.774762
smri_area_cdk_parahpal	dmdtifp1_pc1	B_2y~B_bl	0.742174	0.00810959	91.5181	0	0.742174	0.742174
smri_area_cdk_parahpal	dmdtifp1_pc1	A_2y~B_bl	-0.000265161	0.00765034	-0.0346601	0.972351	-0.000265161	-0.000265161
smri_area_cdk_parahpal	dmdtifp1_pc1	B_2y~A_bl	-0.000267282	0.00810959	-0.0329588	0.973707	-0.000267282	-0.000267282
smri_area_cdk_parahpal	dmdtifp1_pc1	A_bl~~B_bl	-0.000994406	0.0120984	-0.0821935	0.934493	-0.000994406	-0.000994551
smri_area_cdk_parahpal	dmdtifp1_pc1	A_2y~~B_2y	0.00076487	0.00512657	0.149197	0.881398	0.00076487	0.00180531
smri_area_cdk_parahpal	dmdtifp1_pc1	A_2y~~A_2y	0.399685	0.00683948	58.438	0	0.399685	0.399744
smri_area_cdk_parahpal	dmdtifp1_pc1	B_2y~~B_2y	0.449112	0.00768527	58.438	0	0.449112	0.449177
smri_area_cdk_parahpal	dmdtifp1_pc1	A_bl~~A_bl	0.999854	0.0171096	58.438	0	0.999854	1
smri_area_cdk_parahpal	dmdtifp1_pc1	B_bl~~B_bl	0.999854	0.0171096	58.438	0	0.999854	1
smri_area_cdk_paracn	dmdtifp1_pc1	A_2y~A_bl	0.899782	0.00528158	170.362	0	0.899782	0.899782
smri_area_cdk_paracn	dmdtifp1_pc1	B_2y~B_bl	0.742301	0.00811184	91.5083	0	0.742301	0.742301
smri_area_cdk_paracn	dmdtifp1_pc1	A_2y~B_bl	-0.000309358	0.00528158	-0.0585729	0.953292	-0.000309358	-0.000309358
smri_area_cdk_paracn	dmdtifp1_pc1	B_2y~A_bl	-0.00510997	0.00811184	-0.629939	0.528734	-0.00510997	-0.00510997
smri_area_cdk_paracn	dmdtifp1_pc1	A_bl~~B_bl	0.0247832	0.0121021	2.04785	0.0405746	0.0247832	0.0247869
smri_area_cdk_paracn	dmdtifp1_pc1	A_2y~~B_2y	0.00606368	0.0035388	1.71348	0.0866238	0.00606368	0.0207378
smri_area_cdk_paracn	dmdtifp1_pc1	A_2y~~A_2y	0.190378	0.00325778	58.438	0	0.190378	0.190406
smri_area_cdk_paracn	dmdtifp1_pc1	B_2y~~B_2y	0.449086	0.00768482	58.438	0	0.449086	0.449151
smri_area_cdk_paracn	dmdtifp1_pc1	A_bl~~A_bl	0.999854	0.0171096	58.438	0	0.999854	1
smri_area_cdk_paracn	dmdtifp1_pc1	B_bl~~B_bl	0.999854	0.0171096	58.438	0	0.999854	1
smri_area_cdk_parsopc	dmdtifp1_pc1	A_2y~A_bl	0.909829	0.00502128	181.195	0	0.909829	0.909829
smri_area_cdk_parsopc	dmdtifp1_pc1	B_2y~B_bl	0.742206	0.00810931	91.5252	0	0.742206	0.742206
smri_area_cdk_parsopc	dmdtifp1_pc1	A_2y~B_bl	0.00999346	0.00502128	1.99022	0.0465665	0.00999346	0.00999346
smri_area_cdk_parsopc	dmdtifp1_pc1	B_2y~A_bl	0.00645066	0.00810931	0.795463	0.426344	0.00645066	0.00645066
smri_area_cdk_parsopc	dmdtifp1_pc1	A_bl~~B_bl	-0.00496894	0.0120985	-0.410707	0.681287	-0.00496894	-0.00496967
smri_area_cdk_parsopc	dmdtifp1_pc1	A_2y~~B_2y	-0.00164923	0.00336467	-0.490161	0.62402	-0.00164923	-0.00593112
smri_area_cdk_parsopc	dmdtifp1_pc1	A_2y~~A_2y	0.172177	0.00294632	58.438	0	0.172177	0.172202
smri_area_cdk_parsopc	dmdtifp1_pc1	B_2y~~B_2y	0.44907	0.00768456	58.438	0	0.44907	0.449136
smri_area_cdk_parsopc	dmdtifp1_pc1	A_bl~~A_bl	0.999854	0.0171096	58.438	0	0.999854	1
smri_area_cdk_parsopc	dmdtifp1_pc1	B_bl~~B_bl	0.999854	0.0171096	58.438	0	0.999854	1
smri_area_cdk_parsobis	dmdtifp1_pc1	A_2y~A_bl	0.875411	0.00585467	149.523	0	0.875411	0.875411
smri_area_cdk_parsobis	dmdtifp1_pc1	B_2y~B_bl	0.742286	0.0081127	91.4968	0	0.742286	0.742286
smri_area_cdk_parsobis	dmdtifp1_pc1	A_2y~B_bl	0.00624376	0.00585467	1.06646	0.286217	0.00624376	0.00624376
smri_area_cdk_parsobis	dmdtifp1_pc1	B_2y~A_bl	0.00394926	0.0081127	0.4868	0.6264	0.00394926	0.00394926
smri_area_cdk_parsobis	dmdtifp1_pc1	A_bl~~B_bl	-0.0283048	0.0121032	-2.33862	0.0193551	-0.0283048	-0.0283089
smri_area_cdk_parsobis	dmdtifp1_pc1	A_2y~~B_2y	-0.00372246	0.00392189	-0.94915	0.342544	-0.00372246	-0.0114856
smri_area_cdk_parsobis	dmdtifp1_pc1	A_2y~~A_2y	0.233891	0.00400239	58.438	0	0.233891	0.233926
smri_area_cdk_parsobis	dmdtifp1_pc1	B_2y~~B_2y	0.449096	0.007685	58.438	0	0.449096	0.449162
smri_area_cdk_parsobis	dmdtifp1_pc1	A_bl~~A_bl	0.999854	0.0171096	58.438	0	0.999854	1
smri_area_cdk_parsobis	dmdtifp1_pc1	B_bl~~B_bl	0.999854	0.0171096	58.438	0	0.999854	1
smri_area_cdk_parstgris	dmdtifp1_pc1	A_2y~A_bl	0.905531	0.00513434	176.368	0	0.905531	0.905531
smri_area_cdk_parstgris	dmdtifp1_pc1	B_2y~B_bl	0.742177	0.00810973	91.5168	0	0.742177	0.742177
smri_area_cdk_parstgris	dmdtifp1_pc1	A_2y~B_bl	0.00505231	0.00513434	0.984024	0.325104	0.00505231	0.00505231
smri_area_cdk_parstgris	dmdtifp1_pc1	B_2y~A_bl	0.000402948	0.00810973	0.049687	0.960372	0.000402948	0.000402948
smri_area_cdk_parstgris	dmdtifp1_pc1	A_bl~~B_bl	-0.00593939	0.0120986	-0.490917	0.623485	-0.00593939	-0.00594026
smri_area_cdk_parstgris	dmdtifp1_pc1	A_2y~~B_2y	-0.0123218	0.00344373	-3.57804	0.000346178	-0.0123218	-0.0433354
smri_area_cdk_parstgris	dmdtifp1_pc1	A_2y~~A_2y	0.180016	0.00308046	58.438	0	0.180016	0.180042
smri_area_cdk_parstgris	dmdtifp1_pc1	B_2y~~B_2y	0.449112	0.00768527	58.438	0	0.449112	0.449177
smri_area_cdk_parstgris	dmdtifp1_pc1	A_bl~~A_bl	0.999854	0.0171096	58.438	0	0.999854	1
smri_area_cdk_parstgris	dmdtifp1_pc1	B_bl~~B_bl	0.999854	0.0171096	58.438	0	0.999854	1
smri_area_cdk_pericc	dmdtifp1_pc1	A_2y~A_bl	0.859717	0.00617951	139.124	0	0.859717	0.859717
smri_area_cdk_pericc	dmdtifp1_pc1	B_2y~B_bl	0.742162	0.00811007	91.5113	0	0.742162	0.742162
smri_area_cdk_pericc	dmdtifp1_pc1	A_2y~B_bl	-0.00450536	0.00617951	-0.72908	0.465953	-0.00450536	-0.00450536
smri_area_cdk_pericc	dmdtifp1_pc1	B_2y~A_bl	-0.00107866	0.00811007	-0.133002	0.894192	-0.00107866	-0.00107866
smri_area_cdk_pericc	dmdtifp1_pc1	A_bl~~B_bl	-0.011002	0.0120991	-0.909327	0.363178	-0.011002	-0.0110036
smri_area_cdk_pericc	dmdtifp1_pc1	A_2y~~B_2y	-0.0113317	0.00414296	-2.73517	0.00623472	-0.0113317	-0.0331141
smri_area_cdk_pericc	dmdtifp1_pc1	A_2y~~A_2y	0.260743	0.00446188	58.438	0	0.260743	0.260781
smri_area_cdk_pericc	dmdtifp1_pc1	B_2y~~B_2y	0.449111	0.00768525	58.438	0	0.449111	0.449176
smri_area_cdk_pericc	dmdtifp1_pc1	A_bl~~A_bl	0.999854	0.0171096	58.438	0	0.999854	1
smri_area_cdk_pericc	dmdtifp1_pc1	B_bl~~B_bl	0.999854	0.0171096	58.438	0	0.999854	1
smri_area_cdk_postcn	dmdtifp1_pc1	A_2y~A_bl	0.836426	0.00664085	125.952	0	0.836426	0.836426
smri_area_cdk_postcn	dmdtifp1_pc1	B_2y~B_bl	0.742864	0.00810817	91.6192	0	0.742864	0.742864
smri_area_cdk_postcn	dmdtifp1_pc1	A_2y~B_bl	-0.0174239	0.00664085	-2.62375	0.00869686	-0.0174239	-0.0174239
smri_area_cdk_postcn	dmdtifp1_pc1	B_2y~A_bl	-0.0233939	0.00810817	-2.88523	0.00391131	-0.0233939	-0.0233939
smri_area_cdk_postcn	dmdtifp1_pc1	A_bl~~B_bl	0.0294853	0.0121036	2.43608	0.0148474	0.0294853	0.0294897
smri_area_cdk_postcn	dmdtifp1_pc1	A_2y~~B_2y	0.00219712	0.00444553	0.494231	0.621143	0.00219712	0.00598036
smri_area_cdk_postcn	dmdtifp1_pc1	A_2y~~A_2y	0.300903	0.00514911	58.438	0	0.300903	0.300947
smri_area_cdk_postcn	dmdtifp1_pc1	B_2y~~B_2y	0.448565	0.00767591	58.438	0	0.448565	0.448631
smri_area_cdk_postcn	dmdtifp1_pc1	A_bl~~A_bl	0.999854	0.0171096	58.438	0	0.999854	1
smri_area_cdk_postcn	dmdtifp1_pc1	B_bl~~B_bl	0.999854	0.0171096	58.438	0	0.999854	1
smri_area_cdk_ptcate	dmdtifp1_pc1	A_2y~A_bl	0.956359	0.00353331	270.67	0	0.956359	0.956359
smri_area_cdk_ptcate	dmdtifp1_pc1	B_2y~B_bl	0.742119	0.00810988	91.508	0	0.742119	0.742119
smri_area_cdk_ptcate	dmdtifp1_pc1	A_2y~B_bl	0.00464763	0.00353331	1.31538	0.188384	0.00464763	0.00464763
smri_area_cdk_ptcate	dmdtifp1_pc1	B_2y~A_bl	0.00495356	0.00810988	0.610805	0.541328	0.00495356	0.00495356
smri_area_cdk_ptcate	dmdtifp1_pc1	A_bl~~B_bl	0.0112353	0.0120991	0.928606	0.353093	0.0112353	0.011237
smri_area_cdk_ptcate	dmdtifp1_pc1	A_2y~~B_2y	0.00229989	0.00236765	0.97138	0.331359	0.00229989	0.0117546
smri_area_cdk_ptcate	dmdtifp1_pc1	A_2y~~A_2y	0.0852442	0.00145871	58.438	0	0.0852442	0.0852567
smri_area_cdk_ptcate	dmdtifp1_pc1	B_2y~~B_2y	0.449087	0.00768485	58.438	0	0.449087	0.449153
smri_area_cdk_ptcate	dmdtifp1_pc1	A_bl~~A_bl	0.999854	0.0171096	58.438	0	0.999854	1
smri_area_cdk_ptcate	dmdtifp1_pc1	B_bl~~B_bl	0.999854	0.0171096	58.438	0	0.999854	1
smri_area_cdk_precn	dmdtifp1_pc1	A_2y~A_bl	0.82227	0.00688611	119.41	0	0.82227	0.82227
smri_area_cdk_precn	dmdtifp1_pc1	B_2y~B_bl	0.742174	0.00810957	91.5182	0	0.742174	0.742174
smri_area_cdk_precn	dmdtifp1_pc1	A_2y~B_bl	-0.0015297	0.00688611	-0.222143	0.824203	-0.0015297	-0.0015297
smri_area_cdk_precn	dmdtifp1_pc1	B_2y~A_bl	-0.00134222	0.00810957	-0.16551	0.868543	-0.00134222	-0.00134222
smri_area_cdk_precn	dmdtifp1_pc1	A_bl~~B_bl	-0.000429338	0.0120983	-0.0354873	0.971691	-0.000429338	-0.000429401
smri_area_cdk_precn	dmdtifp1_pc1	A_2y~~B_2y	-0.00447221	0.00461475	-0.969111	0.33249	-0.00447221	-0.0117272
smri_area_cdk_precn	dmdtifp1_pc1	A_2y~~A_2y	0.323821	0.00554128	58.438	0	0.323821	0.323869
smri_area_cdk_precn	dmdtifp1_pc1	B_2y~~B_2y	0.44911	0.00768524	58.438	0	0.44911	0.449176
smri_area_cdk_precn	dmdtifp1_pc1	A_bl~~A_bl	0.999854	0.0171096	58.438	0	0.999854	1
smri_area_cdk_precn	dmdtifp1_pc1	B_bl~~B_bl	0.999854	0.0171096	58.438	0	0.999854	1
smri_area_cdk_pc	dmdtifp1_pc1	A_2y~A_bl	0.866765	0.00604168	143.464	0	0.866765	0.866765
smri_area_cdk_pc	dmdtifp1_pc1	B_2y~B_bl	0.742012	0.00811182	91.473	0	0.742012	0.742012
smri_area_cdk_pc	dmdtifp1_pc1	A_2y~B_bl	-0.0146699	0.00604168	-2.42812	0.0151774	-0.0146699	-0.0146699
smri_area_cdk_pc	dmdtifp1_pc1	B_2y~A_bl	0.00639335	0.00811182	0.788153	0.430607	0.00639335	0.00639335
smri_area_cdk_pc	dmdtifp1_pc1	A_bl~~B_bl	0.0253159	0.0121022	2.09184	0.036453	0.0253159	0.0253196
smri_area_cdk_pc	dmdtifp1_pc1	A_2y~~B_2y	-0.00245526	0.00404721	-0.606656	0.544079	-0.00245526	-0.0073408
smri_area_cdk_pc	dmdtifp1_pc1	A_2y~~A_2y	0.249111	0.00426283	58.438	0	0.249111	0.249148
smri_area_cdk_pc	dmdtifp1_pc1	B_2y~~B_2y	0.449071	0.00768457	58.438	0	0.449071	0.449137
smri_area_cdk_pc	dmdtifp1_pc1	A_bl~~A_bl	0.999854	0.0171096	58.438	0	0.999854	1
smri_area_cdk_pc	dmdtifp1_pc1	B_bl~~B_bl	0.999854	0.0171096	58.438	0	0.999854	1
smri_area_cdk_rracate	dmdtifp1_pc1	A_2y~A_bl	0.884797	0.00563905	156.905	0	0.884797	0.884797
smri_area_cdk_rracate	dmdtifp1_pc1	B_2y~B_bl	0.742205	0.00810979	91.5196	0	0.742205	0.742205
smri_area_cdk_rracate	dmdtifp1_pc1	A_2y~B_bl	-0.00263819	0.00563905	-0.467844	0.639896	-0.00263819	-0.00263819
smri_area_cdk_rracate	dmdtifp1_pc1	B_2y~A_bl	-0.00348575	0.00810979	-0.42982	0.667327	-0.00348575	-0.00348575
smri_area_cdk_rracate	dmdtifp1_pc1	A_bl~~B_bl	0.00886762	0.0120988	0.732933	0.4636	0.00886762	0.00886892
smri_area_cdk_rracate	dmdtifp1_pc1	A_2y~~B_2y	0.00476394	0.00377902	1.26063	0.207442	0.00476394	0.0152556
smri_area_cdk_rracate	dmdtifp1_pc1	A_2y~~A_2y	0.217137	0.00371569	58.438	0	0.217137	0.217169
smri_area_cdk_rracate	dmdtifp1_pc1	B_2y~~B_2y	0.4491	0.00768506	58.438	0	0.4491	0.449165
smri_area_cdk_rracate	dmdtifp1_pc1	A_bl~~A_bl	0.999854	0.0171096	58.438	0	0.999854	1
smri_area_cdk_rracate	dmdtifp1_pc1	B_bl~~B_bl	0.999854	0.0171096	58.438	0	0.999854	1
smri_area_cdk_rrmdfr	dmdtifp1_pc1	A_2y~A_bl	0.845086	0.00646193	130.779	0	0.845086	0.845086
smri_area_cdk_rrmdfr	dmdtifp1_pc1	B_2y~B_bl	0.742213	0.00811008	91.5174	0	0.742213	0.742213
smri_area_cdk_rrmdfr	dmdtifp1_pc1	A_2y~B_bl	0.017687	0.00646193	2.73712	0.00619806	0.017687	0.017687
smri_area_cdk_rrmdfr	dmdtifp1_pc1	B_2y~A_bl	-0.00324426	0.00811008	-0.400028	0.689136	-0.00324426	-0.00324426
smri_area_cdk_rrmdfr	dmdtifp1_pc1	A_bl~~B_bl	0.0120708	0.0120992	0.997647	0.318451	0.0120708	0.0120725
smri_area_cdk_rrmdfr	dmdtifp1_pc1	A_2y~~B_2y	-0.00314499	0.00433	-0.726327	0.467638	-0.00314499	-0.00878898
smri_area_cdk_rrmdfr	dmdtifp1_pc1	A_2y~~A_2y	0.285114	0.00487891	58.438	0	0.285114	0.285156
smri_area_cdk_rrmdfr	dmdtifp1_pc1	B_2y~~B_2y	0.449101	0.00768509	58.438	0	0.449101	0.449167
smri_area_cdk_rrmdfr	dmdtifp1_pc1	A_bl~~A_bl	0.999854	0.0171096	58.438	0	0.999854	1
smri_area_cdk_rrmdfr	dmdtifp1_pc1	B_bl~~B_bl	0.999854	0.0171096	58.438	0	0.999854	1
smri_area_cdk_sufr	dmdtifp1_pc1	A_2y~A_bl	0.842163	0.00652681	129.031	0	0.842163	0.842163
smri_area_cdk_sufr	dmdtifp1_pc1	B_2y~B_bl	0.742449	0.00811082	91.5381	0	0.742449	0.742449
smri_area_cdk_sufr	dmdtifp1_pc1	A_2y~B_bl	0.000473686	0.00652681	0.0725754	0.942144	0.000473686	0.000473686
smri_area_cdk_sufr	dmdtifp1_pc1	B_2y~A_bl	0.0113229	0.00811082	1.39603	0.162706	0.0113229	0.0113229
smri_area_cdk_sufr	dmdtifp1_pc1	A_bl~~B_bl	-0.0242754	0.0121019	-2.00592	0.0448652	-0.0242754	-0.024279
smri_area_cdk_sufr	dmdtifp1_pc1	A_2y~~B_2y	-0.00337317	0.00437195	-0.771547	0.440383	-0.00337317	-0.00933622
smri_area_cdk_sufr	dmdtifp1_pc1	A_2y~~A_2y	0.290739	0.00497517	58.438	0	0.290739	0.290781
smri_area_cdk_sufr	dmdtifp1_pc1	B_2y~~B_2y	0.448984	0.00768308	58.438	0	0.448984	0.449049
smri_area_cdk_sufr	dmdtifp1_pc1	A_bl~~A_bl	0.999854	0.0171096	58.438	0	0.999854	1
smri_area_cdk_sufr	dmdtifp1_pc1	B_bl~~B_bl	0.999854	0.0171096	58.438	0	0.999854	1
smri_area_cdk_supl	dmdtifp1_pc1	A_2y~A_bl	0.81389	0.00703319	115.721	0	0.81389	0.81389
smri_area_cdk_supl	dmdtifp1_pc1	B_2y~B_bl	0.742153	0.00811093	91.5004	0	0.742153	0.742153
smri_area_cdk_supl	dmdtifp1_pc1	A_2y~B_bl	-0.00671793	0.00703319	-0.955176	0.339489	-0.00671793	-0.00671793
smri_area_cdk_supl	dmdtifp1_pc1	B_2y~A_bl	0.00113278	0.00811093	0.139661	0.888928	0.00113278	0.00113278
smri_area_cdk_supl	dmdtifp1_pc1	A_bl~~B_bl	0.0182938	0.0121004	1.51184	0.130576	0.0182938	0.0182964
smri_area_cdk_supl	dmdtifp1_pc1	A_2y~~B_2y	-0.00476662	0.00471256	-1.01147	0.311791	-0.00476662	-0.0122398
smri_area_cdk_supl	dmdtifp1_pc1	A_2y~~A_2y	0.337689	0.00577858	58.438	0	0.337689	0.337738
smri_area_cdk_supl	dmdtifp1_pc1	B_2y~~B_2y	0.44911	0.00768525	58.438	0	0.44911	0.449176
smri_area_cdk_supl	dmdtifp1_pc1	A_bl~~A_bl	0.999854	0.0171096	58.438	0	0.999854	1
smri_area_cdk_supl	dmdtifp1_pc1	B_bl~~B_bl	0.999854	0.0171096	58.438	0	0.999854	1
smri_area_cdk_sutm	dmdtifp1_pc1	A_2y~A_bl	0.915573	0.0048661	188.153	0	0.915573	0.915573
smri_area_cdk_sutm	dmdtifp1_pc1	B_2y~B_bl	0.742124	0.00810749	91.5356	0	0.742124	0.742124
smri_area_cdk_sutm	dmdtifp1_pc1	A_2y~B_bl	-0.0060951	0.0048661	-1.25256	0.210365	-0.0060951	-0.0060951
smri_area_cdk_sutm	dmdtifp1_pc1	B_2y~A_bl	0.0153858	0.00810749	1.89773	0.0577317	0.0153858	0.0153858
smri_area_cdk_sutm	dmdtifp1_pc1	A_bl~~B_bl	0.00326034	0.0120984	0.269485	0.787556	0.00326034	0.00326082
smri_area_cdk_sutm	dmdtifp1_pc1	A_2y~~B_2y	-0.00937216	0.00326191	-2.87321	0.00406328	-0.00937216	-0.0347872
smri_area_cdk_sutm	dmdtifp1_pc1	A_2y~~A_2y	0.161702	0.00276707	58.438	0	0.161702	0.161726
smri_area_cdk_sutm	dmdtifp1_pc1	B_2y~~B_2y	0.448875	0.00768122	58.438	0	0.448875	0.448941
smri_area_cdk_sutm	dmdtifp1_pc1	A_bl~~A_bl	0.999854	0.0171096	58.438	0	0.999854	1
smri_area_cdk_sutm	dmdtifp1_pc1	B_bl~~B_bl	0.999854	0.0171096	58.438	0	0.999854	1
smri_area_cdk_sm	dmdtifp1_pc1	A_2y~A_bl	0.883113	0.00567853	155.518	0	0.883113	0.883113
smri_area_cdk_sm	dmdtifp1_pc1	B_2y~B_bl	0.742184	0.00811016	91.5129	0	0.742184	0.742184
smri_area_cdk_sm	dmdtifp1_pc1	A_2y~B_bl	-0.0144647	0.00567853	-2.54726	0.0108574	-0.0144647	-0.0144647
smri_area_cdk_sm	dmdtifp1_pc1	B_2y~A_bl	-0.000826497	0.00811016	-0.101909	0.918829	-0.000826497	-0.000826497
smri_area_cdk_sm	dmdtifp1_pc1	A_bl~~B_bl	0.0119147	0.0120992	0.984747	0.324748	0.0119147	0.0119164
smri_area_cdk_sm	dmdtifp1_pc1	A_2y~~B_2y	0.00272116	0.00380511	0.715133	0.474527	0.00272116	0.00865352
smri_area_cdk_sm	dmdtifp1_pc1	A_2y~~A_2y	0.220175	0.00376767	58.438	0	0.220175	0.220207
smri_area_cdk_sm	dmdtifp1_pc1	B_2y~~B_2y	0.449111	0.00768526	58.438	0	0.449111	0.449177
smri_area_cdk_sm	dmdtifp1_pc1	A_bl~~A_bl	0.999854	0.0171096	58.438	0	0.999854	1
smri_area_cdk_sm	dmdtifp1_pc1	B_bl~~B_bl	0.999854	0.0171096	58.438	0	0.999854	1
smri_area_cdk_frpole	dmdtifp1_pc1	A_2y~A_bl	0.666155	0.00901364	73.9052	0	0.666155	0.666155
smri_area_cdk_frpole	dmdtifp1_pc1	B_2y~B_bl	0.742689	0.00810971	91.5802	0	0.742689	0.742689
smri_area_cdk_frpole	dmdtifp1_pc1	A_2y~B_bl	0.0273158	0.00901364	3.0305	0.0024415	0.0273158	0.0273158
smri_area_cdk_frpole	dmdtifp1_pc1	B_2y~A_bl	-0.0183932	0.00810971	-2.26805	0.0233262	-0.0183932	-0.0183932
smri_area_cdk_frpole	dmdtifp1_pc1	A_bl~~B_bl	0.0279949	0.0121031	2.31304	0.0207204	0.0279949	0.027999
smri_area_cdk_frpole	dmdtifp1_pc1	A_2y~~B_2y	0.00539493	0.00603583	0.893816	0.37142	0.00539493	0.0108159
smri_area_cdk_frpole	dmdtifp1_pc1	A_2y~~A_2y	0.554392	0.00948684	58.438	0	0.554392	0.554473
smri_area_cdk_frpole	dmdtifp1_pc1	B_2y~~B_2y	0.448774	0.00767948	58.438	0	0.448774	0.448839
smri_area_cdk_frpole	dmdtifp1_pc1	A_bl~~A_bl	0.999854	0.0171096	58.438	0	0.999854	1
smri_area_cdk_frpole	dmdtifp1_pc1	B_bl~~B_bl	0.999854	0.0171096	58.438	0	0.999854	1
smri_area_cdk_tmpole	dmdtifp1_pc1	A_2y~A_bl	0.654308	0.00915307	71.4852	0	0.654308	0.654308
smri_area_cdk_tmpole	dmdtifp1_pc1	B_2y~B_bl	0.742056	0.00811699	91.4201	0	0.742056	0.742056
smri_area_cdk_tmpole	dmdtifp1_pc1	A_2y~B_bl	-0.0108331	0.00915307	-1.18355	0.236593	-0.0108331	-0.0108331
smri_area_cdk_tmpole	dmdtifp1_pc1	B_2y~A_bl	-0.00275211	0.00811699	-0.339055	0.734568	-0.00275211	-0.00275211
smri_area_cdk_tmpole	dmdtifp1_pc1	A_bl~~B_bl	-0.0428854	0.0121095	-3.54147	0.000397897	-0.0428854	-0.0428917
smri_area_cdk_tmpole	dmdtifp1_pc1	A_2y~~B_2y	-0.00520575	0.00612818	-0.849477	0.395616	-0.00520575	-0.0102793
smri_area_cdk_tmpole	dmdtifp1_pc1	A_2y~~A_2y	0.571072	0.00977226	58.438	0	0.571072	0.571155
smri_area_cdk_tmpole	dmdtifp1_pc1	B_2y~~B_2y	0.449104	0.00768514	58.438	0	0.449104	0.44917
smri_area_cdk_tmpole	dmdtifp1_pc1	A_bl~~A_bl	0.999854	0.0171096	58.438	0	0.999854	1
smri_area_cdk_tmpole	dmdtifp1_pc1	B_bl~~B_bl	0.999854	0.0171096	58.438	0	0.999854	1
smri_area_cdk_trvtm	dmdtifp1_pc1	A_2y~A_bl	0.88149	0.00571733	154.179	0	0.88149	0.88149
smri_area_cdk_trvtm	dmdtifp1_pc1	B_2y~B_bl	0.74132	0.00811201	91.3855	0	0.74132	0.74132
smri_area_cdk_trvtm	dmdtifp1_pc1	A_2y~B_bl	0.00105401	0.00571733	0.184353	0.853737	0.00105401	0.00105401
smri_area_cdk_trvtm	dmdtifp1_pc1	B_2y~A_bl	0.0213184	0.00811201	2.62801	0.00858867	0.0213184	0.0213184
smri_area_cdk_trvtm	dmdtifp1_pc1	A_bl~~B_bl	0.0400723	0.0121081	3.30956	0.000934436	0.0400723	0.0400782
smri_area_cdk_trvtm	dmdtifp1_pc1	A_2y~~B_2y	3.69646e-05	0.00382622	0.00966087	0.992292	3.69646e-05	0.000116898
smri_area_cdk_trvtm	dmdtifp1_pc1	A_2y~~A_2y	0.222867	0.00381374	58.438	0	0.222867	0.2229
smri_area_cdk_trvtm	dmdtifp1_pc1	B_2y~~B_2y	0.448658	0.00767751	58.438	0	0.448658	0.448724
smri_area_cdk_trvtm	dmdtifp1_pc1	A_bl~~A_bl	0.999854	0.0171096	58.438	0	0.999854	1
smri_area_cdk_trvtm	dmdtifp1_pc1	B_bl~~B_bl	0.999854	0.0171096	58.438	0	0.999854	1
smri_area_cdk_insula	dmdtifp1_pc1	A_2y~A_bl	0.353662	0.0113148	31.2564	0	0.353662	0.353662
smri_area_cdk_insula	dmdtifp1_pc1	B_2y~B_bl	0.741787	0.00811661	91.3912	0	0.741787	0.741787
smri_area_cdk_insula	dmdtifp1_pc1	A_2y~B_bl	0.0336783	0.0113148	2.97647	0.00291584	0.0336783	0.0336783
smri_area_cdk_insula	dmdtifp1_pc1	B_2y~A_bl	0.00886785	0.00811661	1.09256	0.274589	0.00886785	0.00886785
smri_area_cdk_insula	dmdtifp1_pc1	A_bl~~B_bl	0.0436436	0.0121099	3.60397	0.000313398	0.0436436	0.0436499
smri_area_cdk_insula	dmdtifp1_pc1	A_2y~~B_2y	0.00528861	0.00757456	0.698207	0.485048	0.00528861	0.00844869
smri_area_cdk_insula	dmdtifp1_pc1	A_2y~~A_2y	0.872622	0.0149324	58.438	0	0.872622	0.872749
smri_area_cdk_insula	dmdtifp1_pc1	B_2y~~B_2y	0.449033	0.00768393	58.438	0	0.449033	0.449099
smri_area_cdk_insula	dmdtifp1_pc1	A_bl~~A_bl	0.999854	0.0171096	58.438	0	0.999854	1
smri_area_cdk_insula	dmdtifp1_pc1	B_bl~~B_bl	0.999854	0.0171096	58.438	0	0.999854	1
smri_thick_cdk_bankssts	dmdtifp1_pc1	A_2y~A_bl	0.872153	0.00592964	147.084	0	0.872153	0.872153
smri_thick_cdk_bankssts	dmdtifp1_pc1	B_2y~B_bl	0.741997	0.00811346	91.4527	0	0.741997	0.741997
smri_thick_cdk_bankssts	dmdtifp1_pc1	A_2y~B_bl	0.0128587	0.00592964	2.16854	0.0301174	0.0128587	0.0128587
smri_thick_cdk_bankssts	dmdtifp1_pc1	B_2y~A_bl	-0.00552935	0.00811346	-0.681503	0.495553	-0.00552935	-0.00552935
smri_thick_cdk_bankssts	dmdtifp1_pc1	A_bl~~B_bl	-0.0319663	0.0121045	-2.64086	0.0082697	-0.0319663	-0.031971
smri_thick_cdk_bankssts	dmdtifp1_pc1	A_2y~~B_2y	0.000298865	0.00397134	0.0752555	0.940011	0.000298865	0.000910601
smri_thick_cdk_bankssts	dmdtifp1_pc1	A_2y~~A_2y	0.239867	0.00410463	58.438	0	0.239867	0.239902
smri_thick_cdk_bankssts	dmdtifp1_pc1	B_2y~~B_2y	0.449081	0.00768475	58.438	0	0.449081	0.449147
smri_thick_cdk_bankssts	dmdtifp1_pc1	A_bl~~A_bl	0.999854	0.0171096	58.438	0	0.999854	1
smri_thick_cdk_bankssts	dmdtifp1_pc1	B_bl~~B_bl	0.999854	0.0171096	58.438	0	0.999854	1
smri_thick_cdk_cdacate	dmdtifp1_pc1	A_2y~A_bl	0.827257	0.00680026	121.651	0	0.827257	0.827257
smri_thick_cdk_cdacate	dmdtifp1_pc1	B_2y~B_bl	0.74095	0.00815541	90.8538	0	0.74095	0.74095
smri_thick_cdk_cdacate	dmdtifp1_pc1	A_2y~B_bl	0.0176006	0.00680026	2.58822	0.00964732	0.0176006	0.0176006
smri_thick_cdk_cdacate	dmdtifp1_pc1	B_2y~A_bl	0.011416	0.00815541	1.3998	0.161572	0.011416	0.011416
smri_thick_cdk_cdacate	dmdtifp1_pc1	A_bl~~B_bl	0.107176	0.0121677	8.80831	0	0.107176	0.107192
smri_thick_cdk_cdacate	dmdtifp1_pc1	A_2y~~B_2y	0.00451251	0.00453034	0.996063	0.319219	0.00451251	0.0120534
smri_thick_cdk_cdacate	dmdtifp1_pc1	A_2y~~A_2y	0.312169	0.00534188	58.438	0	0.312169	0.312215
smri_thick_cdk_cdacate	dmdtifp1_pc1	B_2y~~B_2y	0.448983	0.00768306	58.438	0	0.448983	0.449049
smri_thick_cdk_cdacate	dmdtifp1_pc1	A_bl~~A_bl	0.999854	0.0171096	58.438	0	0.999854	1
smri_thick_cdk_cdacate	dmdtifp1_pc1	B_bl~~B_bl	0.999854	0.0171096	58.438	0	0.999854	1
smri_thick_cdk_cdmdfr	dmdtifp1_pc1	A_2y~A_bl	0.665269	0.00903363	73.6435	0	0.665269	0.665269
smri_thick_cdk_cdmdfr	dmdtifp1_pc1	B_2y~B_bl	0.742249	0.00810835	91.5414	0	0.742249	0.742249
smri_thick_cdk_cdmdfr	dmdtifp1_pc1	A_2y~B_bl	0.0130597	0.00903363	1.44567	0.14827	0.0130597	0.0130597
smri_thick_cdk_cdmdfr	dmdtifp1_pc1	B_2y~A_bl	0.0123976	0.00810835	1.52899	0.126267	0.0123976	0.0123976
smri_thick_cdk_cdmdfr	dmdtifp1_pc1	A_bl~~B_bl	-0.00604499	0.0120986	-0.499645	0.617325	-0.00604499	-0.00604588
smri_thick_cdk_cdmdfr	dmdtifp1_pc1	A_2y~~B_2y	0.00972141	0.00605351	1.60591	0.108293	0.00972141	0.0194354
smri_thick_cdk_cdmdfr	dmdtifp1_pc1	A_2y~~A_2y	0.55727	0.0095361	58.438	0	0.55727	0.557352
smri_thick_cdk_cdmdfr	dmdtifp1_pc1	B_2y~~B_2y	0.448958	0.00768264	58.438	0	0.448958	0.449024
smri_thick_cdk_cdmdfr	dmdtifp1_pc1	A_bl~~A_bl	0.999854	0.0171096	58.438	0	0.999854	1
smri_thick_cdk_cdmdfr	dmdtifp1_pc1	B_bl~~B_bl	0.999854	0.0171096	58.438	0	0.999854	1
smri_thick_cdk_cuneus	dmdtifp1_pc1	A_2y~A_bl	0.83291	0.00668323	124.627	0	0.83291	0.83291
smri_thick_cdk_cuneus	dmdtifp1_pc1	B_2y~B_bl	0.741736	0.00811835	91.3653	0	0.741736	0.741736
smri_thick_cdk_cuneus	dmdtifp1_pc1	A_2y~B_bl	-0.0191395	0.00668323	-2.86381	0.00418578	-0.0191395	-0.0191395
smri_thick_cdk_cuneus	dmdtifp1_pc1	B_2y~A_bl	-0.00905394	0.00811835	-1.11524	0.264746	-0.00905394	-0.00905394
smri_thick_cdk_cuneus	dmdtifp1_pc1	A_bl~~B_bl	-0.0483715	0.0121125	-3.99352	6.50992e-05	-0.0483715	-0.0483786
smri_thick_cdk_cuneus	dmdtifp1_pc1	A_2y~~B_2y	-0.00228415	0.00447292	-0.510662	0.609588	-0.00228415	-0.00617919
smri_thick_cdk_cuneus	dmdtifp1_pc1	A_2y~~A_2y	0.304307	0.00520734	58.438	0	0.304307	0.304351
smri_thick_cdk_cuneus	dmdtifp1_pc1	B_2y~~B_2y	0.44903	0.00768387	58.438	0	0.44903	0.449096
smri_thick_cdk_cuneus	dmdtifp1_pc1	A_bl~~A_bl	0.999854	0.0171096	58.438	0	0.999854	1
smri_thick_cdk_cuneus	dmdtifp1_pc1	B_bl~~B_bl	0.999854	0.0171096	58.438	0	0.999854	1
smri_thick_cdk_ehinal	dmdtifp1_pc1	A_2y~A_bl	0.536708	0.0102072	52.5815	0	0.536708	0.536708
smri_thick_cdk_ehinal	dmdtifp1_pc1	B_2y~B_bl	0.741662	0.0081226	91.3085	0	0.741662	0.741662
smri_thick_cdk_ehinal	dmdtifp1_pc1	A_2y~B_bl	-0.0298762	0.0102072	-2.92699	0.00342264	-0.0298762	-0.0298762
smri_thick_cdk_ehinal	dmdtifp1_pc1	B_2y~A_bl	-0.00881813	0.0081226	-1.08563	0.277643	-0.00881813	-0.00881813
smri_thick_cdk_ehinal	dmdtifp1_pc1	A_bl~~B_bl	-0.0580728	0.0121187	-4.79198	1.65141e-06	-0.0580728	-0.0580813
smri_thick_cdk_ehinal	dmdtifp1_pc1	A_2y~~B_2y	-0.0027942	0.00682785	-0.409235	0.682367	-0.0027942	-0.00495186
smri_thick_cdk_ehinal	dmdtifp1_pc1	A_2y~~A_2y	0.709086	0.012134	58.438	0	0.709086	0.70919
smri_thick_cdk_ehinal	dmdtifp1_pc1	B_2y~~B_2y	0.449034	0.00768394	58.438	0	0.449034	0.4491
smri_thick_cdk_ehinal	dmdtifp1_pc1	A_bl~~A_bl	0.999854	0.0171096	58.438	0	0.999854	1
smri_thick_cdk_ehinal	dmdtifp1_pc1	B_bl~~B_bl	0.999854	0.0171096	58.438	0	0.999854	1
smri_thick_cdk_fusiform	dmdtifp1_pc1	A_2y~A_bl	0.745173	0.00805012	92.5667	0	0.745173	0.745173
smri_thick_cdk_fusiform	dmdtifp1_pc1	B_2y~B_bl	0.739096	0.00821698	89.9473	0	0.739096	0.739096
smri_thick_cdk_fusiform	dmdtifp1_pc1	A_2y~B_bl	-0.0477959	0.00805012	-5.93729	2.89776e-09	-0.0477959	-0.0477959
smri_thick_cdk_fusiform	dmdtifp1_pc1	B_2y~A_bl	-0.0188332	0.00821698	-2.29199	0.0219063	-0.0188332	-0.0188332
smri_thick_cdk_fusiform	dmdtifp1_pc1	A_bl~~B_bl	-0.163434	0.0122589	-13.3318	0	-0.163434	-0.163457
smri_thick_cdk_fusiform	dmdtifp1_pc1	A_2y~~B_2y	0.000946732	0.00531987	0.177961	0.858753	0.000946732	0.00215336
smri_thick_cdk_fusiform	dmdtifp1_pc1	A_2y~~A_2y	0.430726	0.00737064	58.438	0	0.430726	0.430789
smri_thick_cdk_fusiform	dmdtifp1_pc1	B_2y~~B_2y	0.448767	0.00767936	58.438	0	0.448767	0.448832
smri_thick_cdk_fusiform	dmdtifp1_pc1	A_bl~~A_bl	0.999854	0.0171096	58.438	0	0.999854	1
smri_thick_cdk_fusiform	dmdtifp1_pc1	B_bl~~B_bl	0.999854	0.0171096	58.438	0	0.999854	1
smri_thick_cdk_ifpl	dmdtifp1_pc1	A_2y~A_bl	0.680193	0.00886195	76.7544	0	0.680193	0.680193
smri_thick_cdk_ifpl	dmdtifp1_pc1	B_2y~B_bl	0.741931	0.0081085	91.5004	0	0.741931	0.741931
smri_thick_cdk_ifpl	dmdtifp1_pc1	A_2y~B_bl	-0.0238537	0.00886195	-2.6917	0.00710885	-0.0238537	-0.0238537
smri_thick_cdk_ifpl	dmdtifp1_pc1	B_2y~A_bl	-0.0153021	0.0081085	-1.88717	0.0591376	-0.0153021	-0.0153021
smri_thick_cdk_ifpl	dmdtifp1_pc1	A_bl~~B_bl	-0.015895	0.0120999	-1.31365	0.188964	-0.015895	-0.0158973
smri_thick_cdk_ifpl	dmdtifp1_pc1	A_2y~~B_2y	-0.00226242	0.00593624	-0.38112	0.703114	-0.00226242	-0.00461165
smri_thick_cdk_ifpl	dmdtifp1_pc1	A_2y~~A_2y	0.536174	0.00917509	58.438	0	0.536174	0.536252
smri_thick_cdk_ifpl	dmdtifp1_pc1	B_2y~~B_2y	0.448878	0.00768126	58.438	0	0.448878	0.448943
smri_thick_cdk_ifpl	dmdtifp1_pc1	A_bl~~A_bl	0.999854	0.0171096	58.438	0	0.999854	1
smri_thick_cdk_ifpl	dmdtifp1_pc1	B_bl~~B_bl	0.999854	0.0171096	58.438	0	0.999854	1
smri_thick_cdk_iftm	dmdtifp1_pc1	A_2y~A_bl	0.744405	0.00806551	92.2949	0	0.744405	0.744405
smri_thick_cdk_iftm	dmdtifp1_pc1	B_2y~B_bl	0.741679	0.00815482	90.9498	0	0.741679	0.741679
smri_thick_cdk_iftm	dmdtifp1_pc1	A_2y~B_bl	-0.03399	0.00806551	-4.21424	2.50621e-05	-0.03399	-0.03399
smri_thick_cdk_iftm	dmdtifp1_pc1	B_2y~A_bl	-0.00469311	0.00815482	-0.575501	0.564952	-0.00469311	-0.00469311
smri_thick_cdk_iftm	dmdtifp1_pc1	A_bl~~B_bl	-0.105398	0.0121654	-8.66373	0	-0.105398	-0.105413
smri_thick_cdk_iftm	dmdtifp1_pc1	A_2y~~B_2y	0.00376677	0.00537472	0.70083	0.483409	0.00376677	0.00848043
smri_thick_cdk_iftm	dmdtifp1_pc1	A_2y~~A_2y	0.439307	0.00751748	58.438	0	0.439307	0.439371
smri_thick_cdk_iftm	dmdtifp1_pc1	B_2y~~B_2y	0.44909	0.0076849	58.438	0	0.44909	0.449156
smri_thick_cdk_iftm	dmdtifp1_pc1	A_bl~~A_bl	0.999854	0.0171096	58.438	0	0.999854	1
smri_thick_cdk_iftm	dmdtifp1_pc1	B_bl~~B_bl	0.999854	0.0171096	58.438	0	0.999854	1
smri_thick_cdk_ihcate	dmdtifp1_pc1	A_2y~A_bl	0.802048	0.00722595	110.995	0	0.802048	0.802048
smri_thick_cdk_ihcate	dmdtifp1_pc1	B_2y~B_bl	0.741651	0.00812334	91.2987	0	0.741651	0.741651
smri_thick_cdk_ihcate	dmdtifp1_pc1	A_2y~B_bl	0.0125803	0.00722595	1.74098	0.0816862	0.0125803	0.0125803
smri_thick_cdk_ihcate	dmdtifp1_pc1	B_2y~A_bl	0.00877931	0.00812334	1.08075	0.279808	0.00877931	0.00877931
smri_thick_cdk_ihcate	dmdtifp1_pc1	A_bl~~B_bl	0.0596068	0.0121198	4.91812	8.73779e-07	0.0596068	0.0596155
smri_thick_cdk_ihcate	dmdtifp1_pc1	A_2y~~B_2y	0.00109123	0.00483317	0.22578	0.821373	0.00109123	0.00273198
smri_thick_cdk_ihcate	dmdtifp1_pc1	A_2y~~A_2y	0.355305	0.00608003	58.438	0	0.355305	0.355357
smri_thick_cdk_ihcate	dmdtifp1_pc1	B_2y~~B_2y	0.449035	0.00768396	58.438	0	0.449035	0.449101
smri_thick_cdk_ihcate	dmdtifp1_pc1	A_bl~~A_bl	0.999854	0.0171096	58.438	0	0.999854	1
smri_thick_cdk_ihcate	dmdtifp1_pc1	B_bl~~B_bl	0.999854	0.0171096	58.438	0	0.999854	1
smri_thick_cdk_locc	dmdtifp1_pc1	A_2y~A_bl	0.816311	0.00699586	116.685	0	0.816311	0.816311
smri_thick_cdk_locc	dmdtifp1_pc1	B_2y~B_bl	0.742119	0.00811408	91.4607	0	0.742119	0.742119
smri_thick_cdk_locc	dmdtifp1_pc1	A_2y~B_bl	-0.00543859	0.00699586	-0.777401	0.436922	-0.00543859	-0.00543859
smri_thick_cdk_locc	dmdtifp1_pc1	B_2y~A_bl	0.00163938	0.00811408	0.202041	0.839885	0.00163938	0.00163938
smri_thick_cdk_locc	dmdtifp1_pc1	A_bl~~B_bl	0.0333544	0.0121051	2.7554	0.005862	0.0333544	0.0333592
smri_thick_cdk_locc	dmdtifp1_pc1	A_2y~~B_2y	0.00526869	0.0046858	1.1244	0.260845	0.00526869	0.0136066
smri_thick_cdk_locc	dmdtifp1_pc1	A_2y~~A_2y	0.333854	0.00571296	58.438	0	0.333854	0.333903
smri_thick_cdk_locc	dmdtifp1_pc1	B_2y~~B_2y	0.449109	0.00768522	58.438	0	0.449109	0.449175
smri_thick_cdk_locc	dmdtifp1_pc1	A_bl~~A_bl	0.999854	0.0171096	58.438	0	0.999854	1
smri_thick_cdk_locc	dmdtifp1_pc1	B_bl~~B_bl	0.999854	0.0171096	58.438	0	0.999854	1
smri_thick_cdk_lobfr	dmdtifp1_pc1	A_2y~A_bl	0.503958	0.0104126	48.3989	0	0.503958	0.503958
smri_thick_cdk_lobfr	dmdtifp1_pc1	B_2y~B_bl	0.741505	0.00813947	91.0999	0	0.741505	0.741505
smri_thick_cdk_lobfr	dmdtifp1_pc1	A_2y~B_bl	0.0701658	0.0104126	6.73856	1.59961e-11	0.0701658	0.0701658
smri_thick_cdk_lobfr	dmdtifp1_pc1	B_2y~A_bl	0.00774091	0.00813947	0.951034	0.341587	0.00774091	0.00774091
smri_thick_cdk_lobfr	dmdtifp1_pc1	A_bl~~B_bl	0.0863694	0.0121434	7.11245	1.13998e-12	0.0863694	0.086382
smri_thick_cdk_lobfr	dmdtifp1_pc1	A_2y~~B_2y	0.0103311	0.00695214	1.48603	0.13727	0.0103311	0.0179841
smri_thick_cdk_lobfr	dmdtifp1_pc1	A_2y~~A_2y	0.734887	0.0125755	58.438	0	0.734887	0.734995
smri_thick_cdk_lobfr	dmdtifp1_pc1	B_2y~~B_2y	0.449052	0.00768425	58.438	0	0.449052	0.449118
smri_thick_cdk_lobfr	dmdtifp1_pc1	A_bl~~A_bl	0.999854	0.0171096	58.438	0	0.999854	1
smri_thick_cdk_lobfr	dmdtifp1_pc1	B_bl~~B_bl	0.999854	0.0171096	58.438	0	0.999854	1
smri_thick_cdk_lingual	dmdtifp1_pc1	A_2y~A_bl	0.808451	0.00713577	113.295	0	0.808451	0.808451
smri_thick_cdk_lingual	dmdtifp1_pc1	B_2y~B_bl	0.74169	0.00813644	91.1566	0	0.74169	0.74169
smri_thick_cdk_lingual	dmdtifp1_pc1	A_2y~B_bl	-0.00682075	0.00713577	-0.955853	0.339147	-0.00682075	-0.00682075
smri_thick_cdk_lingual	dmdtifp1_pc1	B_2y~A_bl	-0.00592864	0.00813644	-0.728653	0.466214	-0.00592864	-0.00592864
smri_thick_cdk_lingual	dmdtifp1_pc1	A_bl~~B_bl	-0.0816454	0.0121386	-6.72609	1.74283e-11	-0.0816454	-0.0816574
smri_thick_cdk_lingual	dmdtifp1_pc1	A_2y~~B_2y	0.00682754	0.00476631	1.43246	0.152013	0.00682754	0.0173355
smri_thick_cdk_lingual	dmdtifp1_pc1	A_2y~~A_2y	0.345409	0.00591069	58.438	0	0.345409	0.34546
smri_thick_cdk_lingual	dmdtifp1_pc1	B_2y~~B_2y	0.449077	0.00768467	58.438	0	0.449077	0.449143
smri_thick_cdk_lingual	dmdtifp1_pc1	A_bl~~A_bl	0.999854	0.0171096	58.438	0	0.999854	1
smri_thick_cdk_lingual	dmdtifp1_pc1	B_bl~~B_bl	0.999854	0.0171096	58.438	0	0.999854	1
smri_thick_cdk_mobfr	dmdtifp1_pc1	A_2y~A_bl	0.597553	0.00971049	61.5369	0	0.597553	0.597553
smri_thick_cdk_mobfr	dmdtifp1_pc1	B_2y~B_bl	0.742655	0.0081132	91.5366	0	0.742655	0.742655
smri_thick_cdk_mobfr	dmdtifp1_pc1	A_2y~B_bl	0.0354839	0.00971049	3.65419	0.000257999	0.0354839	0.0354839
smri_thick_cdk_mobfr	dmdtifp1_pc1	B_2y~A_bl	0.0133899	0.0081132	1.65039	0.0988642	0.0133899	0.0133899
smri_thick_cdk_mobfr	dmdtifp1_pc1	A_bl~~B_bl	-0.035914	0.0121061	-2.96659	0.00301118	-0.035914	-0.0359193
smri_thick_cdk_mobfr	dmdtifp1_pc1	A_2y~~B_2y	-0.00364748	0.00650174	-0.561001	0.574797	-0.00364748	-0.00678833
smri_thick_cdk_mobfr	dmdtifp1_pc1	A_2y~~A_2y	0.6431	0.0110048	58.438	0	0.6431	0.643194
smri_thick_cdk_mobfr	dmdtifp1_pc1	B_2y~~B_2y	0.448933	0.00768221	58.438	0	0.448933	0.448998
smri_thick_cdk_mobfr	dmdtifp1_pc1	A_bl~~A_bl	0.999854	0.0171096	58.438	0	0.999854	1
smri_thick_cdk_mobfr	dmdtifp1_pc1	B_bl~~B_bl	0.999854	0.0171096	58.438	0	0.999854	1
smri_thick_cdk_mdtm	dmdtifp1_pc1	A_2y~A_bl	0.706822	0.00856293	82.5444	0	0.706822	0.706822
smri_thick_cdk_mdtm	dmdtifp1_pc1	B_2y~B_bl	0.74222	0.00811169	91.5	0	0.74222	0.74222
smri_thick_cdk_mdtm	dmdtifp1_pc1	A_2y~B_bl	0.00481191	0.00856293	0.561947	0.574152	0.00481191	0.00481191
smri_thick_cdk_mdtm	dmdtifp1_pc1	B_2y~A_bl	0.00199093	0.00811169	0.24544	0.806116	0.00199093	0.00199093
smri_thick_cdk_mdtm	dmdtifp1_pc1	A_bl~~B_bl	-0.0229858	0.0121015	-1.89941	0.0575108	-0.0229858	-0.0229891
smri_thick_cdk_mdtm	dmdtifp1_pc1	A_2y~~B_2y	-0.00651969	0.00573709	-1.13641	0.255785	-0.00651969	-0.013752
smri_thick_cdk_mdtm	dmdtifp1_pc1	A_2y~~A_2y	0.500463	0.008564	58.438	0	0.500463	0.500536
smri_thick_cdk_mdtm	dmdtifp1_pc1	B_2y~~B_2y	0.449108	0.0076852	58.438	0	0.449108	0.449174
smri_thick_cdk_mdtm	dmdtifp1_pc1	A_bl~~A_bl	0.999854	0.0171096	58.438	0	0.999854	1
smri_thick_cdk_mdtm	dmdtifp1_pc1	B_bl~~B_bl	0.999854	0.0171096	58.438	0	0.999854	1
smri_thick_cdk_parahpal	dmdtifp1_pc1	A_2y~A_bl	0.817524	0.00698406	117.056	0	0.817524	0.817524
smri_thick_cdk_parahpal	dmdtifp1_pc1	B_2y~B_bl	0.741115	0.0081304	91.1535	0	0.741115	0.741115
smri_thick_cdk_parahpal	dmdtifp1_pc1	A_2y~B_bl	-0.00287578	0.00698406	-0.411763	0.680513	-0.00287578	-0.00287578
smri_thick_cdk_parahpal	dmdtifp1_pc1	B_2y~A_bl	-0.0142086	0.0081304	-1.74759	0.0805342	-0.0142086	-0.0142086
smri_thick_cdk_parahpal	dmdtifp1_pc1	A_bl~~B_bl	-0.0745443	0.0121319	-6.14448	8.02277e-10	-0.0745443	-0.0745552
smri_thick_cdk_parahpal	dmdtifp1_pc1	A_2y~~B_2y	0.00413006	0.00466628	0.885087	0.37611	0.00413006	0.0107103
smri_thick_cdk_parahpal	dmdtifp1_pc1	A_2y~~A_2y	0.331247	0.00566836	58.438	0	0.331247	0.331296
smri_thick_cdk_parahpal	dmdtifp1_pc1	B_2y~~B_2y	0.448911	0.00768183	58.438	0	0.448911	0.448977
smri_thick_cdk_parahpal	dmdtifp1_pc1	A_bl~~A_bl	0.999854	0.0171096	58.438	0	0.999854	1
smri_thick_cdk_parahpal	dmdtifp1_pc1	B_bl~~B_bl	0.999854	0.0171096	58.438	0	0.999854	1
smri_thick_cdk_paracn	dmdtifp1_pc1	A_2y~A_bl	0.77555	0.00770753	100.622	0	0.77555	0.77555
smri_thick_cdk_paracn	dmdtifp1_pc1	B_2y~B_bl	0.742002	0.00817039	90.816	0	0.742002	0.742002
smri_thick_cdk_paracn	dmdtifp1_pc1	A_2y~B_bl	-0.00660254	0.00770753	-0.856635	0.391647	-0.00660254	-0.00660254
smri_thick_cdk_paracn	dmdtifp1_pc1	B_2y~A_bl	0.00141323	0.00817039	0.17297	0.862675	0.00141323	0.00141323
smri_thick_cdk_paracn	dmdtifp1_pc1	A_bl~~B_bl	0.121768	0.0121877	9.99106	0	0.121768	0.121786
smri_thick_cdk_paracn	dmdtifp1_pc1	A_2y~~B_2y	-0.0100723	0.00512788	-1.96423	0.0495039	-0.0100723	-0.0237741
smri_thick_cdk_paracn	dmdtifp1_pc1	A_2y~~A_2y	0.399667	0.00683916	58.438	0	0.399667	0.399725
smri_thick_cdk_paracn	dmdtifp1_pc1	B_2y~~B_2y	0.44911	0.00768524	58.438	0	0.44911	0.449176
smri_thick_cdk_paracn	dmdtifp1_pc1	A_bl~~A_bl	0.999854	0.0171096	58.438	0	0.999854	1
smri_thick_cdk_paracn	dmdtifp1_pc1	B_bl~~B_bl	0.999854	0.0171096	58.438	0	0.999854	1
smri_thick_cdk_parsopc	dmdtifp1_pc1	A_2y~A_bl	0.736338	0.00818814	89.9274	0	0.736338	0.736338
smri_thick_cdk_parsopc	dmdtifp1_pc1	B_2y~B_bl	0.74226	0.00810978	91.5265	0	0.74226	0.74226
smri_thick_cdk_parsopc	dmdtifp1_pc1	A_2y~B_bl	0.00292328	0.00818814	0.357014	0.721081	0.00292328	0.00292328
smri_thick_cdk_parsopc	dmdtifp1_pc1	B_2y~A_bl	0.00691538	0.00810978	0.852721	0.393814	0.00691538	0.00691538
smri_thick_cdk_parsopc	dmdtifp1_pc1	A_bl~~B_bl	-0.0123959	0.0120993	-1.02452	0.305592	-0.0123959	-0.0123977
smri_thick_cdk_parsopc	dmdtifp1_pc1	A_2y~~B_2y	0.0129956	0.00548848	2.36779	0.0178949	0.0129956	0.0286623
smri_thick_cdk_parsopc	dmdtifp1_pc1	A_2y~~A_2y	0.457784	0.00783367	58.438	0	0.457784	0.457851
smri_thick_cdk_parsopc	dmdtifp1_pc1	B_2y~~B_2y	0.449064	0.00768445	58.438	0	0.449064	0.44913
smri_thick_cdk_parsopc	dmdtifp1_pc1	A_bl~~A_bl	0.999854	0.0171096	58.438	0	0.999854	1
smri_thick_cdk_parsopc	dmdtifp1_pc1	B_bl~~B_bl	0.999854	0.0171096	58.438	0	0.999854	1
smri_thick_cdk_parsobis	dmdtifp1_pc1	A_2y~A_bl	0.757848	0.00789602	95.9786	0	0.757848	0.757848
smri_thick_cdk_parsobis	dmdtifp1_pc1	B_2y~B_bl	0.742053	0.00810956	91.5034	0	0.742053	0.742053
smri_thick_cdk_parsobis	dmdtifp1_pc1	A_2y~B_bl	-0.0138541	0.00789602	-1.75456	0.0793341	-0.0138541	-0.0138541
smri_thick_cdk_parsobis	dmdtifp1_pc1	B_2y~A_bl	0.00909093	0.00810956	1.12101	0.262282	0.00909093	0.00909093
smri_thick_cdk_parsobis	dmdtifp1_pc1	A_bl~~B_bl	0.0133682	0.0120994	1.10486	0.269219	0.0133682	0.0133702
smri_thick_cdk_parsobis	dmdtifp1_pc1	A_2y~~B_2y	0.0101928	0.00529167	1.9262	0.0540791	0.0101928	0.0233136
smri_thick_cdk_parsobis	dmdtifp1_pc1	A_2y~~A_2y	0.425692	0.00728451	58.438	0	0.425692	0.425755
smri_thick_cdk_parsobis	dmdtifp1_pc1	B_2y~~B_2y	0.449029	0.00768385	58.438	0	0.449029	0.449095
smri_thick_cdk_parsobis	dmdtifp1_pc1	A_bl~~A_bl	0.999854	0.0171096	58.438	0	0.999854	1
smri_thick_cdk_parsobis	dmdtifp1_pc1	B_bl~~B_bl	0.999854	0.0171096	58.438	0	0.999854	1
smri_thick_cdk_parstgris	dmdtifp1_pc1	A_2y~A_bl	0.658857	0.00910451	72.366	0	0.658857	0.658857
smri_thick_cdk_parstgris	dmdtifp1_pc1	B_2y~B_bl	0.742149	0.00811105	91.4984	0	0.742149	0.742149
smri_thick_cdk_parstgris	dmdtifp1_pc1	A_2y~B_bl	0.00163045	0.00910451	0.179081	0.857874	0.00163045	0.00163045
smri_thick_cdk_parstgris	dmdtifp1_pc1	B_2y~A_bl	-0.0013405	0.00811105	-0.165269	0.868733	-0.0013405	-0.0013405
smri_thick_cdk_parstgris	dmdtifp1_pc1	A_bl~~B_bl	-0.019133	0.0121006	-1.58117	0.113839	-0.019133	-0.0191358
smri_thick_cdk_parstgris	dmdtifp1_pc1	A_2y~~B_2y	0.0231583	0.00610632	3.79251	0.000149134	0.0231583	0.0459382
smri_thick_cdk_parstgris	dmdtifp1_pc1	A_2y~~A_2y	0.565863	0.00968313	58.438	0	0.565863	0.565946
smri_thick_cdk_parstgris	dmdtifp1_pc1	B_2y~~B_2y	0.44911	0.00768524	58.438	0	0.44911	0.449176
smri_thick_cdk_parstgris	dmdtifp1_pc1	A_bl~~A_bl	0.999854	0.0171096	58.438	0	0.999854	1
smri_thick_cdk_parstgris	dmdtifp1_pc1	B_bl~~B_bl	0.999854	0.0171096	58.438	0	0.999854	1
smri_thick_cdk_pericc	dmdtifp1_pc1	A_2y~A_bl	0.770637	0.00771216	99.925	0	0.770637	0.770637
smri_thick_cdk_pericc	dmdtifp1_pc1	B_2y~B_bl	0.74217	0.00811004	91.5124	0	0.74217	0.74217
smri_thick_cdk_pericc	dmdtifp1_pc1	A_2y~B_bl	0.00894083	0.00771216	1.15932	0.246327	0.00894083	0.00894083
smri_thick_cdk_pericc	dmdtifp1_pc1	B_2y~A_bl	-0.000426362	0.00811004	-0.0525721	0.958073	-0.000426362	-0.000426362
smri_thick_cdk_pericc	dmdtifp1_pc1	A_bl~~B_bl	-0.0106377	0.012099	-0.879223	0.379281	-0.0106377	-0.0106393
smri_thick_cdk_pericc	dmdtifp1_pc1	A_2y~~B_2y	0.0151307	0.00517094	2.92611	0.00343226	0.0151307	0.0354285
smri_thick_cdk_pericc	dmdtifp1_pc1	A_2y~~A_2y	0.406125	0.00694967	58.438	0	0.406125	0.406185
smri_thick_cdk_pericc	dmdtifp1_pc1	B_2y~~B_2y	0.449112	0.00768527	58.438	0	0.449112	0.449177
smri_thick_cdk_pericc	dmdtifp1_pc1	A_bl~~A_bl	0.999854	0.0171096	58.438	0	0.999854	1
smri_thick_cdk_pericc	dmdtifp1_pc1	B_bl~~B_bl	0.999854	0.0171096	58.438	0	0.999854	1
smri_thick_cdk_postcn	dmdtifp1_pc1	A_2y~A_bl	0.660071	0.00908992	72.6157	0	0.660071	0.660071
smri_thick_cdk_postcn	dmdtifp1_pc1	B_2y~B_bl	0.74217	0.00810982	91.515	0	0.74217	0.74217
smri_thick_cdk_postcn	dmdtifp1_pc1	A_2y~B_bl	0.00988278	0.00908992	1.08722	0.276938	0.00988278	0.00988278
smri_thick_cdk_postcn	dmdtifp1_pc1	B_2y~A_bl	-0.000603276	0.00810982	-0.0743884	0.940701	-0.000603276	-0.000603276
smri_thick_cdk_postcn	dmdtifp1_pc1	A_bl~~B_bl	-0.00759707	0.0120987	-0.627925	0.530053	-0.00759707	-0.00759819
smri_thick_cdk_postcn	dmdtifp1_pc1	A_2y~~B_2y	0.00572412	0.00609145	0.939697	0.347373	0.00572412	0.0113712
smri_thick_cdk_postcn	dmdtifp1_pc1	A_2y~~A_2y	0.564225	0.0096551	58.438	0	0.564225	0.564307
smri_thick_cdk_postcn	dmdtifp1_pc1	B_2y~~B_2y	0.449111	0.00768526	58.438	0	0.449111	0.449177
smri_thick_cdk_postcn	dmdtifp1_pc1	A_bl~~A_bl	0.999854	0.0171096	58.438	0	0.999854	1
smri_thick_cdk_postcn	dmdtifp1_pc1	B_bl~~B_bl	0.999854	0.0171096	58.438	0	0.999854	1
smri_thick_cdk_ptcate	dmdtifp1_pc1	A_2y~A_bl	0.815457	0.00702311	116.111	0	0.815457	0.815457
smri_thick_cdk_ptcate	dmdtifp1_pc1	B_2y~B_bl	0.740622	0.00815292	90.8413	0	0.740622	0.740622
smri_thick_cdk_ptcate	dmdtifp1_pc1	A_2y~B_bl	0.0103181	0.00702311	1.46917	0.141787	0.0103181	0.0103181
smri_thick_cdk_ptcate	dmdtifp1_pc1	B_2y~A_bl	0.0147473	0.00815292	1.80883	0.0704769	0.0147473	0.0147473
smri_thick_cdk_ptcate	dmdtifp1_pc1	A_bl~~B_bl	0.105229	0.0121652	8.65001	0	0.105229	0.105244
smri_thick_cdk_ptcate	dmdtifp1_pc1	A_2y~~B_2y	0.00669022	0.00467969	1.42963	0.152824	0.00669022	0.0173013
smri_thick_cdk_ptcate	dmdtifp1_pc1	A_2y~~A_2y	0.333103	0.00570012	58.438	0	0.333103	0.333152
smri_thick_cdk_ptcate	dmdtifp1_pc1	B_2y~~B_2y	0.448897	0.00768159	58.438	0	0.448897	0.448962
smri_thick_cdk_ptcate	dmdtifp1_pc1	A_bl~~A_bl	0.999854	0.0171096	58.438	0	0.999854	1
smri_thick_cdk_ptcate	dmdtifp1_pc1	B_bl~~B_bl	0.999854	0.0171096	58.438	0	0.999854	1
smri_thick_cdk_precn	dmdtifp1_pc1	A_2y~A_bl	0.604168	0.00964913	62.6137	0	0.604168	0.604168
smri_thick_cdk_precn	dmdtifp1_pc1	B_2y~B_bl	0.741908	0.00812711	91.2881	0	0.741908	0.741908
smri_thick_cdk_precn	dmdtifp1_pc1	A_2y~B_bl	0.0186305	0.00964913	1.93079	0.0535087	0.0186305	0.0186305
smri_thick_cdk_precn	dmdtifp1_pc1	B_2y~A_bl	0.00403255	0.00812711	0.496184	0.619764	0.00403255	0.00403255
smri_thick_cdk_precn	dmdtifp1_pc1	A_bl~~B_bl	0.0658966	0.0121246	5.43495	5.48115e-08	0.0658966	0.0659062
smri_thick_cdk_precn	dmdtifp1_pc1	A_2y~~B_2y	0.0153181	0.00645446	2.37326	0.0176319	0.0153181	0.0287286
smri_thick_cdk_precn	dmdtifp1_pc1	A_2y~~A_2y	0.633058	0.010833	58.438	0	0.633058	0.63315
smri_thick_cdk_precn	dmdtifp1_pc1	B_2y~~B_2y	0.449096	0.00768499	58.438	0	0.449096	0.449161
smri_thick_cdk_precn	dmdtifp1_pc1	A_bl~~A_bl	0.999854	0.0171096	58.438	0	0.999854	1
smri_thick_cdk_precn	dmdtifp1_pc1	B_bl~~B_bl	0.999854	0.0171096	58.438	0	0.999854	1
smri_thick_cdk_pc	dmdtifp1_pc1	A_2y~A_bl	0.753802	0.00798537	94.3978	0	0.753802	0.753802
smri_thick_cdk_pc	dmdtifp1_pc1	B_2y~B_bl	0.743436	0.00814121	91.3177	0	0.743436	0.743436
smri_thick_cdk_pc	dmdtifp1_pc1	A_2y~B_bl	-0.00131301	0.00798537	-0.164427	0.869395	-0.00131301	-0.00131301
smri_thick_cdk_pc	dmdtifp1_pc1	B_2y~A_bl	-0.0139536	0.00814121	-1.71394	0.0865389	-0.0139536	-0.0139536
smri_thick_cdk_pc	dmdtifp1_pc1	A_bl~~B_bl	0.0904324	0.0121477	7.44439	9.74776e-14	0.0904324	0.0904457
smri_thick_cdk_pc	dmdtifp1_pc1	A_2y~~B_2y	0.0018889	0.00532804	0.35452	0.722949	0.0018889	0.00428977
smri_thick_cdk_pc	dmdtifp1_pc1	A_2y~~A_2y	0.431897	0.00739069	58.438	0	0.431897	0.43196
smri_thick_cdk_pc	dmdtifp1_pc1	B_2y~~B_2y	0.448919	0.00768196	58.438	0	0.448919	0.448984
smri_thick_cdk_pc	dmdtifp1_pc1	A_bl~~A_bl	0.999854	0.0171096	58.438	0	0.999854	1
smri_thick_cdk_pc	dmdtifp1_pc1	B_bl~~B_bl	0.999854	0.0171096	58.438	0	0.999854	1
smri_thick_cdk_rracate	dmdtifp1_pc1	A_2y~A_bl	0.689459	0.0087229	79.0401	0	0.689459	0.689459
smri_thick_cdk_rracate	dmdtifp1_pc1	B_2y~B_bl	0.738968	0.00818244	90.3115	0	0.738968	0.738968
smri_thick_cdk_rracate	dmdtifp1_pc1	A_2y~B_bl	0.0593709	0.0087229	6.80632	1.00127e-11	0.0593709	0.0593709
smri_thick_cdk_rracate	dmdtifp1_pc1	B_2y~A_bl	0.0233248	0.00818244	2.85059	0.00436378	0.0233248	0.0233248
smri_thick_cdk_rracate	dmdtifp1_pc1	A_bl~~B_bl	0.13744	0.0122121	11.2544	0	0.13744	0.13746
smri_thick_cdk_rracate	dmdtifp1_pc1	A_2y~~B_2y	0.00885558	0.00578736	1.53016	0.125977	0.00885558	0.0185183
smri_thick_cdk_rracate	dmdtifp1_pc1	A_2y~~A_2y	0.509794	0.00872367	58.438	0	0.509794	0.509868
smri_thick_cdk_rracate	dmdtifp1_pc1	B_2y~~B_2y	0.448578	0.00767614	58.438	0	0.448578	0.448644
smri_thick_cdk_rracate	dmdtifp1_pc1	A_bl~~A_bl	0.999854	0.0171096	58.438	0	0.999854	1
smri_thick_cdk_rracate	dmdtifp1_pc1	B_bl~~B_bl	0.999854	0.0171096	58.438	0	0.999854	1
smri_thick_cdk_rrmdfr	dmdtifp1_pc1	A_2y~A_bl	0.61255	0.00953497	64.2425	0	0.61255	0.61255
smri_thick_cdk_rrmdfr	dmdtifp1_pc1	B_2y~B_bl	0.739495	0.00814235	90.8209	0	0.739495	0.739495
smri_thick_cdk_rrmdfr	dmdtifp1_pc1	A_2y~B_bl	0.0557695	0.00953497	5.84894	4.94703e-09	0.0557695	0.0557695
smri_thick_cdk_rrmdfr	dmdtifp1_pc1	B_2y~A_bl	0.0272614	0.00814235	3.34809	0.000813692	0.0272614	0.0272614
smri_thick_cdk_rrmdfr	dmdtifp1_pc1	A_bl~~B_bl	0.0982539	0.0121566	8.08234	6.66134e-16	0.0982539	0.0982683
smri_thick_cdk_rrmdfr	dmdtifp1_pc1	A_2y~~B_2y	0.0348586	0.00636732	5.47462	4.38455e-08	0.0348586	0.0663894
smri_thick_cdk_rrmdfr	dmdtifp1_pc1	A_2y~~A_2y	0.614868	0.0105217	58.438	0	0.614868	0.614958
smri_thick_cdk_rrmdfr	dmdtifp1_pc1	B_2y~~B_2y	0.448376	0.00767268	58.438	0	0.448376	0.448442
smri_thick_cdk_rrmdfr	dmdtifp1_pc1	A_bl~~A_bl	0.999854	0.0171096	58.438	0	0.999854	1
smri_thick_cdk_rrmdfr	dmdtifp1_pc1	B_bl~~B_bl	0.999854	0.0171096	58.438	0	0.999854	1
smri_thick_cdk_sufr	dmdtifp1_pc1	A_2y~A_bl	0.650756	0.00916538	71.0015	0	0.650756	0.650756
smri_thick_cdk_sufr	dmdtifp1_pc1	B_2y~B_bl	0.738094	0.00827892	89.1534	0	0.738094	0.738094
smri_thick_cdk_sufr	dmdtifp1_pc1	A_2y~B_bl	0.0774124	0.00916538	8.44618	0	0.0774124	0.0774124
smri_thick_cdk_sufr	dmdtifp1_pc1	B_2y~A_bl	0.0200726	0.00827892	2.42454	0.0153278	0.0200726	0.0200726
smri_thick_cdk_sufr	dmdtifp1_pc1	A_bl~~B_bl	0.203231	0.0123457	16.4617	0	0.203231	0.203261
smri_thick_cdk_sufr	dmdtifp1_pc1	A_2y~~B_2y	0.00876258	0.00601194	1.45753	0.14497	0.00876258	0.017639
smri_thick_cdk_sufr	dmdtifp1_pc1	A_2y~~A_2y	0.549964	0.00941107	58.438	0	0.549964	0.550045
smri_thick_cdk_sufr	dmdtifp1_pc1	B_2y~~B_2y	0.448726	0.00767866	58.438	0	0.448726	0.448791
smri_thick_cdk_sufr	dmdtifp1_pc1	A_bl~~A_bl	0.999854	0.0171096	58.438	0	0.999854	1
smri_thick_cdk_sufr	dmdtifp1_pc1	B_bl~~B_bl	0.999854	0.0171096	58.438	0	0.999854	1
smri_thick_cdk_supl	dmdtifp1_pc1	A_2y~A_bl	0.684089	0.00883462	77.4328	0	0.684089	0.684089
smri_thick_cdk_supl	dmdtifp1_pc1	B_2y~B_bl	0.742607	0.00811254	91.5382	0	0.742607	0.742607
smri_thick_cdk_supl	dmdtifp1_pc1	A_2y~B_bl	-0.0161805	0.00883462	-1.83149	0.0670279	-0.0161805	-0.0161805
smri_thick_cdk_supl	dmdtifp1_pc1	B_2y~A_bl	-0.0130306	0.00811254	-1.60623	0.108223	-0.0130306	-0.0130306
smri_thick_cdk_supl	dmdtifp1_pc1	A_bl~~B_bl	0.0332431	0.012105	2.74622	0.00602864	0.0332431	0.0332479
smri_thick_cdk_supl	dmdtifp1_pc1	A_2y~~B_2y	-0.0147874	0.00591847	-2.49851	0.0124717	-0.0147874	-0.0302461
smri_thick_cdk_supl	dmdtifp1_pc1	A_2y~~A_2y	0.532418	0.00911082	58.438	0	0.532418	0.532496
smri_thick_cdk_supl	dmdtifp1_pc1	B_2y~~B_2y	0.448942	0.00768237	58.438	0	0.448942	0.449008
smri_thick_cdk_supl	dmdtifp1_pc1	A_bl~~A_bl	0.999854	0.0171096	58.438	0	0.999854	1
smri_thick_cdk_supl	dmdtifp1_pc1	B_bl~~B_bl	0.999854	0.0171096	58.438	0	0.999854	1
smri_thick_cdk_sutm	dmdtifp1_pc1	A_2y~A_bl	0.727081	0.00826527	87.9682	0	0.727081	0.727081
smri_thick_cdk_sutm	dmdtifp1_pc1	B_2y~B_bl	0.741938	0.00811504	91.4275	0	0.741938	0.741938
smri_thick_cdk_sutm	dmdtifp1_pc1	A_2y~B_bl	0.0511587	0.00826527	6.1896	6.03185e-10	0.0511587	0.0511587
smri_thick_cdk_sutm	dmdtifp1_pc1	B_2y~A_bl	0.00625524	0.00811504	0.770821	0.440813	0.00625524	0.00625524
smri_thick_cdk_sutm	dmdtifp1_pc1	A_bl~~B_bl	0.0378042	0.012107	3.12251	0.00179316	0.0378042	0.0378097
smri_thick_cdk_sutm	dmdtifp1_pc1	A_2y~~B_2y	0.0136114	0.00553688	2.45831	0.0139593	0.0136114	0.029759
smri_thick_cdk_sutm	dmdtifp1_pc1	A_2y~~A_2y	0.465854	0.00797177	58.438	0	0.465854	0.465923
smri_thick_cdk_sutm	dmdtifp1_pc1	B_2y~~B_2y	0.449073	0.0076846	58.438	0	0.449073	0.449138
smri_thick_cdk_sutm	dmdtifp1_pc1	A_bl~~A_bl	0.999854	0.0171096	58.438	0	0.999854	1
smri_thick_cdk_sutm	dmdtifp1_pc1	B_bl~~B_bl	0.999854	0.0171096	58.438	0	0.999854	1
smri_thick_cdk_sm	dmdtifp1_pc1	A_2y~A_bl	0.614274	0.00956639	64.2117	0	0.614274	0.614274
smri_thick_cdk_sm	dmdtifp1_pc1	B_2y~B_bl	0.741516	0.00812749	91.2356	0	0.741516	0.741516
smri_thick_cdk_sm	dmdtifp1_pc1	A_2y~B_bl	-0.00556385	0.00956639	-0.581604	0.560833	-0.00556385	-0.00556385
smri_thick_cdk_sm	dmdtifp1_pc1	B_2y~A_bl	-0.00969363	0.00812749	-1.1927	0.232988	-0.00969363	-0.00969363
smri_thick_cdk_sm	dmdtifp1_pc1	A_bl~~B_bl	-0.0678768	0.0121262	-5.59754	2.17416e-08	-0.0678768	-0.0678868
smri_thick_cdk_sm	dmdtifp1_pc1	A_2y~~B_2y	-0.00785479	0.00639577	-1.22812	0.219401	-0.00785479	-0.0148621
smri_thick_cdk_sm	dmdtifp1_pc1	A_2y~~A_2y	0.622081	0.0106451	58.438	0	0.622081	0.622172
smri_thick_cdk_sm	dmdtifp1_pc1	B_2y~~B_2y	0.449018	0.00768367	58.438	0	0.449018	0.449084
smri_thick_cdk_sm	dmdtifp1_pc1	A_bl~~A_bl	0.999854	0.0171096	58.438	0	0.999854	1
smri_thick_cdk_sm	dmdtifp1_pc1	B_bl~~B_bl	0.999854	0.0171096	58.438	0	0.999854	1
smri_thick_cdk_frpole	dmdtifp1_pc1	A_2y~A_bl	0.708395	0.00854335	82.9177	0	0.708395	0.708395
smri_thick_cdk_frpole	dmdtifp1_pc1	B_2y~B_bl	0.741996	0.00811229	91.4657	0	0.741996	0.741996
smri_thick_cdk_frpole	dmdtifp1_pc1	A_2y~B_bl	0.00101028	0.00854335	0.118253	0.905867	0.00101028	0.00101028
smri_thick_cdk_frpole	dmdtifp1_pc1	B_2y~A_bl	0.00645826	0.00811229	0.796109	0.425969	0.00645826	0.00645826
smri_thick_cdk_frpole	dmdtifp1_pc1	A_bl~~B_bl	0.0275555	0.0121029	2.27676	0.0228003	0.0275555	0.0275596
smri_thick_cdk_frpole	dmdtifp1_pc1	A_2y~~B_2y	0.00947476	0.00572369	1.65536	0.0978517	0.00947476	0.0200341
smri_thick_cdk_frpole	dmdtifp1_pc1	A_2y~~A_2y	0.498063	0.00852292	58.438	0	0.498063	0.498136
smri_thick_cdk_frpole	dmdtifp1_pc1	B_2y~~B_2y	0.44907	0.00768456	58.438	0	0.44907	0.449136
smri_thick_cdk_frpole	dmdtifp1_pc1	A_bl~~A_bl	0.999854	0.0171096	58.438	0	0.999854	1
smri_thick_cdk_frpole	dmdtifp1_pc1	B_bl~~B_bl	0.999854	0.0171096	58.438	0	0.999854	1
smri_thick_cdk_tmpole	dmdtifp1_pc1	A_2y~A_bl	0.511779	0.0103805	49.3018	0	0.511779	0.511779
smri_thick_cdk_tmpole	dmdtifp1_pc1	B_2y~B_bl	0.741596	0.0081342	91.1701	0	0.741596	0.741596
smri_thick_cdk_tmpole	dmdtifp1_pc1	A_2y~B_bl	-0.0507127	0.0103805	-4.88536	1.03239e-06	-0.0507127	-0.0507127
smri_thick_cdk_tmpole	dmdtifp1_pc1	B_2y~A_bl	-0.00736987	0.0081342	-0.906035	0.364917	-0.00736987	-0.00736987
smri_thick_cdk_tmpole	dmdtifp1_pc1	A_bl~~B_bl	-0.078484	0.0121356	-6.46728	9.97848e-11	-0.078484	-0.0784955
smri_thick_cdk_tmpole	dmdtifp1_pc1	A_2y~~B_2y	-0.0073965	0.00693479	-1.06658	0.286162	-0.0073965	-0.0129068
smri_thick_cdk_tmpole	dmdtifp1_pc1	A_2y~~A_2y	0.731329	0.0125146	58.438	0	0.731329	0.731436
smri_thick_cdk_tmpole	dmdtifp1_pc1	B_2y~~B_2y	0.449058	0.00768435	58.438	0	0.449058	0.449124
smri_thick_cdk_tmpole	dmdtifp1_pc1	A_bl~~A_bl	0.999854	0.0171096	58.438	0	0.999854	1
smri_thick_cdk_tmpole	dmdtifp1_pc1	B_bl~~B_bl	0.999854	0.0171096	58.438	0	0.999854	1
smri_thick_cdk_trvtm	dmdtifp1_pc1	A_2y~A_bl	0.777128	0.00764172	101.695	0	0.777128	0.777128
smri_thick_cdk_trvtm	dmdtifp1_pc1	B_2y~B_bl	0.742078	0.00817159	90.812	0	0.742078	0.742078
smri_thick_cdk_trvtm	dmdtifp1_pc1	A_2y~B_bl	0.015748	0.00764172	2.06079	0.0393232	0.015748	0.015748
smri_thick_cdk_trvtm	dmdtifp1_pc1	B_2y~A_bl	0.000784014	0.00817159	0.0959439	0.923565	0.000784014	0.000784014
smri_thick_cdk_trvtm	dmdtifp1_pc1	A_bl~~B_bl	0.122939	0.0121895	10.0857	0	0.122939	0.122957
smri_thick_cdk_trvtm	dmdtifp1_pc1	A_2y~~B_2y	0.00945203	0.00508321	1.85946	0.0629621	0.00945203	0.0225054
smri_thick_cdk_trvtm	dmdtifp1_pc1	A_2y~~A_2y	0.392757	0.00672092	58.438	0	0.392757	0.392814
smri_thick_cdk_trvtm	dmdtifp1_pc1	B_2y~~B_2y	0.449111	0.00768526	58.438	0	0.449111	0.449177
smri_thick_cdk_trvtm	dmdtifp1_pc1	A_bl~~A_bl	0.999854	0.0171096	58.438	0	0.999854	1
smri_thick_cdk_trvtm	dmdtifp1_pc1	B_bl~~B_bl	0.999854	0.0171096	58.438	0	0.999854	1
smri_thick_cdk_insula	dmdtifp1_pc1	A_2y~A_bl	0.481721	0.0105621	45.6082	0	0.481721	0.481721
smri_thick_cdk_insula	dmdtifp1_pc1	B_2y~B_bl	0.739374	0.00821742	89.9764	0	0.739374	0.739374
smri_thick_cdk_insula	dmdtifp1_pc1	A_2y~B_bl	-0.101659	0.0105621	-9.62488	0	-0.101659	-0.101659
smri_thick_cdk_insula	dmdtifp1_pc1	B_2y~A_bl	-0.0171363	0.00821742	-2.08536	0.0370367	-0.0171363	-0.0171363
smri_thick_cdk_insula	dmdtifp1_pc1	A_bl~~B_bl	-0.163359	0.0122588	-13.3259	0	-0.163359	-0.163383
smri_thick_cdk_insula	dmdtifp1_pc1	A_2y~~B_2y	-0.00194316	0.0069805	-0.278369	0.780729	-0.00194316	-0.00336832
smri_thick_cdk_insula	dmdtifp1_pc1	A_2y~~A_2y	0.7415	0.0126887	58.438	0	0.7415	0.741608
smri_thick_cdk_insula	dmdtifp1_pc1	B_2y~~B_2y	0.448826	0.00768038	58.438	0	0.448826	0.448892
smri_thick_cdk_insula	dmdtifp1_pc1	A_bl~~A_bl	0.999854	0.0171096	58.438	0	0.999854	1
smri_thick_cdk_insula	dmdtifp1_pc1	B_bl~~B_bl	0.999854	0.0171096	58.438	0	0.999854	1
smri_vol_scs_cbwmatter	dmdtifp1_pc1	A_2y~A_bl	0.407096	0.0110408	36.8719	0	0.407096	0.407096
smri_vol_scs_cbwmatter	dmdtifp1_pc1	B_2y~B_bl	0.742202	0.00810957	91.5217	0	0.742202	0.742202
smri_vol_scs_cbwmatter	dmdtifp1_pc1	A_2y~B_bl	0.0442777	0.0110408	4.01037	6.06245e-05	0.0442777	0.0442777
smri_vol_scs_cbwmatter	dmdtifp1_pc1	B_2y~A_bl	0.00438494	0.00810957	0.540712	0.588706	0.00438494	0.00438494
smri_vol_scs_cbwmatter	dmdtifp1_pc1	A_bl~~B_bl	-0.00632422	0.0120986	-0.522724	0.601167	-0.00632422	-0.00632515
smri_vol_scs_cbwmatter	dmdtifp1_pc1	A_2y~~B_2y	-0.0185797	0.00740166	-2.51022	0.0120658	-0.0185797	-0.0303879
smri_vol_scs_cbwmatter	dmdtifp1_pc1	A_2y~~A_2y	0.832419	0.0142445	58.438	0	0.832419	0.83254
smri_vol_scs_cbwmatter	dmdtifp1_pc1	B_2y~~B_2y	0.449093	0.00768494	58.438	0	0.449093	0.449158
smri_vol_scs_cbwmatter	dmdtifp1_pc1	A_bl~~A_bl	0.999854	0.0171096	58.438	0	0.999854	1
smri_vol_scs_cbwmatter	dmdtifp1_pc1	B_bl~~B_bl	0.999854	0.0171096	58.438	0	0.999854	1
smri_vol_scs_ltventricle	dmdtifp1_pc1	A_2y~A_bl	0.970424	0.00292275	332.024	0	0.970424	0.970424
smri_vol_scs_ltventricle	dmdtifp1_pc1	B_2y~B_bl	0.742073	0.00811046	91.4959	0	0.742073	0.742073
smri_vol_scs_ltventricle	dmdtifp1_pc1	A_2y~B_bl	0.00159052	0.00292275	0.544186	0.586314	0.00159052	0.00159052
smri_vol_scs_ltventricle	dmdtifp1_pc1	B_2y~A_bl	-0.00589487	0.00811046	-0.726823	0.467334	-0.00589487	-0.00589487
smri_vol_scs_ltventricle	dmdtifp1_pc1	A_bl~~B_bl	-0.0170917	0.0121001	-1.41252	0.157796	-0.0170917	-0.0170942
smri_vol_scs_ltventricle	dmdtifp1_pc1	A_2y~~B_2y	-0.00262518	0.00195846	-1.34043	0.180104	-0.00262518	-0.0162215
smri_vol_scs_ltventricle	dmdtifp1_pc1	A_2y~~A_2y	0.0583194	0.00099797	58.438	0	0.0583194	0.0583279
smri_vol_scs_ltventricle	dmdtifp1_pc1	B_2y~~B_2y	0.449077	0.00768467	58.438	0	0.449077	0.449143
smri_vol_scs_ltventricle	dmdtifp1_pc1	A_bl~~A_bl	0.999854	0.0171096	58.438	0	0.999854	1
smri_vol_scs_ltventricle	dmdtifp1_pc1	B_bl~~B_bl	0.999854	0.0171096	58.438	0	0.999854	1
smri_vol_scs_inflatvent	dmdtifp1_pc1	A_2y~A_bl	0.797403	0.00730006	109.232	0	0.797403	0.797403
smri_vol_scs_inflatvent	dmdtifp1_pc1	B_2y~B_bl	0.741853	0.00810958	91.4786	0	0.741853	0.741853
smri_vol_scs_inflatvent	dmdtifp1_pc1	A_2y~B_bl	-0.00805459	0.00730006	-1.10336	0.269871	-0.00805459	-0.00805459
smri_vol_scs_inflatvent	dmdtifp1_pc1	B_2y~A_bl	-0.0146837	0.00810958	-1.81066	0.0701942	-0.0146837	-0.0146837
smri_vol_scs_inflatvent	dmdtifp1_pc1	A_bl~~B_bl	-0.02188	0.0121012	-1.80808	0.0705941	-0.02188	-0.0218832
smri_vol_scs_inflatvent	dmdtifp1_pc1	A_2y~~B_2y	-0.00584272	0.00489	-1.19483	0.232154	-0.00584272	-0.0144591
smri_vol_scs_inflatvent	dmdtifp1_pc1	A_2y~~A_2y	0.36375	0.00622454	58.438	0	0.36375	0.363803
smri_vol_scs_inflatvent	dmdtifp1_pc1	B_2y~~B_2y	0.448896	0.00768158	58.438	0	0.448896	0.448962
smri_vol_scs_inflatvent	dmdtifp1_pc1	A_bl~~A_bl	0.999854	0.0171096	58.438	0	0.999854	1
smri_vol_scs_inflatvent	dmdtifp1_pc1	B_bl~~B_bl	0.999854	0.0171096	58.438	0	0.999854	1
smri_vol_scs_crbwmatter	dmdtifp1_pc1	A_2y~A_bl	0.294006	0.0115659	25.4201	0	0.294006	0.294006
smri_vol_scs_crbwmatter	dmdtifp1_pc1	B_2y~B_bl	0.742123	0.00811002	91.507	0	0.742123	0.742123
smri_vol_scs_crbwmatter	dmdtifp1_pc1	A_2y~B_bl	0.0039852	0.0115659	0.344565	0.730422	0.0039852	0.0039852
smri_vol_scs_crbwmatter	dmdtifp1_pc1	B_2y~A_bl	0.00422352	0.00811002	0.520778	0.602522	0.00422352	0.00422352
smri_vol_scs_crbwmatter	dmdtifp1_pc1	A_bl~~B_bl	0.0121001	0.0120992	1.00007	0.317278	0.0121001	0.0121018
smri_vol_scs_crbwmatter	dmdtifp1_pc1	A_2y~~B_2y	0.0076818	0.00775025	0.991167	0.321604	0.0076818	0.0119941
smri_vol_scs_crbwmatter	dmdtifp1_pc1	A_2y~~A_2y	0.913383	0.0156299	58.438	0	0.913383	0.913516
smri_vol_scs_crbwmatter	dmdtifp1_pc1	B_2y~~B_2y	0.449094	0.00768496	58.438	0	0.449094	0.44916
smri_vol_scs_crbwmatter	dmdtifp1_pc1	A_bl~~A_bl	0.999854	0.0171096	58.438	0	0.999854	1
smri_vol_scs_crbwmatter	dmdtifp1_pc1	B_bl~~B_bl	0.999854	0.0171096	58.438	0	0.999854	1
smri_vol_scs_crbcortex	dmdtifp1_pc1	A_2y~A_bl	0.694621	0.00872154	79.6443	0	0.694621	0.694621
smri_vol_scs_crbcortex	dmdtifp1_pc1	B_2y~B_bl	0.741708	0.00813546	91.1697	0	0.741708	0.741708
smri_vol_scs_crbcortex	dmdtifp1_pc1	A_2y~B_bl	0.0107633	0.00872154	1.2341	0.217164	0.0107633	0.0107633
smri_vol_scs_crbcortex	dmdtifp1_pc1	B_2y~A_bl	0.00582102	0.00813546	0.715512	0.474293	0.00582102	0.00582102
smri_vol_scs_crbcortex	dmdtifp1_pc1	A_bl~~B_bl	0.0801486	0.0121372	6.60358	4.01359e-11	0.0801486	0.0801604
smri_vol_scs_crbcortex	dmdtifp1_pc1	A_2y~~B_2y	0.00897925	0.00582637	1.54114	0.123283	0.00897925	0.0186512
smri_vol_scs_crbcortex	dmdtifp1_pc1	A_2y~~A_2y	0.516112	0.00883179	58.438	0	0.516112	0.516188
smri_vol_scs_crbcortex	dmdtifp1_pc1	B_2y~~B_2y	0.449078	0.00768469	58.438	0	0.449078	0.449144
smri_vol_scs_crbcortex	dmdtifp1_pc1	A_bl~~A_bl	0.999854	0.0171096	58.438	0	0.999854	1
smri_vol_scs_crbcortex	dmdtifp1_pc1	B_bl~~B_bl	0.999854	0.0171096	58.438	0	0.999854	1
smri_vol_scs_tp	dmdtifp1_pc1	A_2y~A_bl	0.502395	0.0104659	48.0029	0	0.502395	0.502395
smri_vol_scs_tp	dmdtifp1_pc1	B_2y~B_bl	0.741667	0.00810738	91.4806	0	0.741667	0.741667
smri_vol_scs_tp	dmdtifp1_pc1	A_2y~B_bl	-0.010088	0.0104659	-0.963887	0.335103	-0.010088	-0.010088
smri_vol_scs_tp	dmdtifp1_pc1	B_2y~A_bl	0.0219877	0.00810738	2.71206	0.0066867	0.0219877	0.0219877
smri_vol_scs_tp	dmdtifp1_pc1	A_bl~~B_bl	0.0230439	0.0121016	1.90421	0.0568828	0.0230439	0.0230473
smri_vol_scs_tp	dmdtifp1_pc1	A_2y~~B_2y	0.0139634	0.00700971	1.99201	0.0463699	0.0139634	0.0241106
smri_vol_scs_tp	dmdtifp1_pc1	A_2y~~A_2y	0.747622	0.0127934	58.438	0	0.747622	0.747731
smri_vol_scs_tp	dmdtifp1_pc1	B_2y~~B_2y	0.448629	0.007677	58.438	0	0.448629	0.448694
smri_vol_scs_tp	dmdtifp1_pc1	A_bl~~A_bl	0.999854	0.0171096	58.438	0	0.999854	1
smri_vol_scs_tp	dmdtifp1_pc1	B_bl~~B_bl	0.999854	0.0171096	58.438	0	0.999854	1
smri_vol_scs_caudate	dmdtifp1_pc1	A_2y~A_bl	0.727132	0.00830931	87.508	0	0.727132	0.727132
smri_vol_scs_caudate	dmdtifp1_pc1	B_2y~B_bl	0.742306	0.00811895	91.4288	0	0.742306	0.742306
smri_vol_scs_caudate	dmdtifp1_pc1	A_2y~B_bl	0.00998602	0.00830931	1.20179	0.229446	0.00998602	0.00998602
smri_vol_scs_caudate	dmdtifp1_pc1	B_2y~A_bl	-0.00274001	0.00811895	-0.337484	0.735752	-0.00274001	-0.00274001
smri_vol_scs_caudate	dmdtifp1_pc1	A_bl~~B_bl	0.0481829	0.0121124	3.97799	6.95012e-05	0.0481829	0.04819
smri_vol_scs_caudate	dmdtifp1_pc1	A_2y~~B_2y	0.00732453	0.00556234	1.31681	0.187903	0.00732453	0.0159356
smri_vol_scs_caudate	dmdtifp1_pc1	A_2y~~A_2y	0.470411	0.00804975	58.438	0	0.470411	0.47048
smri_vol_scs_caudate	dmdtifp1_pc1	B_2y~~B_2y	0.449104	0.00768514	58.438	0	0.449104	0.44917
smri_vol_scs_caudate	dmdtifp1_pc1	A_bl~~A_bl	0.999854	0.0171096	58.438	0	0.999854	1
smri_vol_scs_caudate	dmdtifp1_pc1	B_bl~~B_bl	0.999854	0.0171096	58.438	0	0.999854	1
smri_vol_scs_putamen	dmdtifp1_pc1	A_2y~A_bl	0.424081	0.0109557	38.7086	0	0.424081	0.424081
smri_vol_scs_putamen	dmdtifp1_pc1	B_2y~B_bl	0.741703	0.00812042	91.338	0	0.741703	0.741703
smri_vol_scs_putamen	dmdtifp1_pc1	A_2y~B_bl	-0.0339776	0.0109557	-3.10135	0.00192639	-0.0339776	-0.0339776
smri_vol_scs_putamen	dmdtifp1_pc1	B_2y~A_bl	-0.0088367	0.00812042	-1.08821	0.276504	-0.0088367	-0.0088367
smri_vol_scs_putamen	dmdtifp1_pc1	A_bl~~B_bl	-0.0532855	0.0121155	-4.39812	1.09194e-05	-0.0532855	-0.0532933
smri_vol_scs_putamen	dmdtifp1_pc1	A_2y~~B_2y	-0.00234851	0.00733053	-0.320374	0.748685	-0.00234851	-0.00387659
smri_vol_scs_putamen	dmdtifp1_pc1	A_2y~~A_2y	0.817345	0.0139865	58.438	0	0.817345	0.817465
smri_vol_scs_putamen	dmdtifp1_pc1	B_2y~~B_2y	0.449034	0.00768394	58.438	0	0.449034	0.4491
smri_vol_scs_putamen	dmdtifp1_pc1	A_bl~~A_bl	0.999854	0.0171096	58.438	0	0.999854	1
smri_vol_scs_putamen	dmdtifp1_pc1	B_bl~~B_bl	0.999854	0.0171096	58.438	0	0.999854	1
smri_vol_scs_pallidum	dmdtifp1_pc1	A_2y~A_bl	0.338927	0.0113201	29.9403	0	0.338927	0.338927
smri_vol_scs_pallidum	dmdtifp1_pc1	B_2y~B_bl	0.738721	0.00818379	90.2665	0	0.738721	0.738721
smri_vol_scs_pallidum	dmdtifp1_pc1	A_2y~B_bl	0.123353	0.0113201	10.8969	0	0.123353	0.123353
smri_vol_scs_pallidum	dmdtifp1_pc1	B_2y~A_bl	0.0248077	0.00818379	3.03133	0.0024348	0.0248077	0.0248077
smri_vol_scs_pallidum	dmdtifp1_pc1	A_bl~~B_bl	0.139158	0.012215	11.3924	0	0.139158	0.139178
smri_vol_scs_pallidum	dmdtifp1_pc1	A_2y~~B_2y	0.00975838	0.00750775	1.29977	0.193679	0.00975838	0.0157294
smri_vol_scs_pallidum	dmdtifp1_pc1	A_2y~~A_2y	0.858149	0.0146848	58.438	0	0.858149	0.858275
smri_vol_scs_pallidum	dmdtifp1_pc1	B_2y~~B_2y	0.448508	0.00767494	58.438	0	0.448508	0.448574
smri_vol_scs_pallidum	dmdtifp1_pc1	A_bl~~A_bl	0.999854	0.0171096	58.438	0	0.999854	1
smri_vol_scs_pallidum	dmdtifp1_pc1	B_bl~~B_bl	0.999854	0.0171096	58.438	0	0.999854	1
smri_vol_scs_hpus	dmdtifp1_pc1	A_2y~A_bl	0.712606	0.00848995	83.9352	0	0.712606	0.712606
smri_vol_scs_hpus	dmdtifp1_pc1	B_2y~B_bl	0.74178	0.00811	91.4648	0	0.74178	0.74178
smri_vol_scs_hpus	dmdtifp1_pc1	A_2y~B_bl	-0.00505103	0.00848995	-0.594942	0.551882	-0.00505103	-0.00505103
smri_vol_scs_hpus	dmdtifp1_pc1	B_2y~A_bl	-0.0155633	0.00811	-1.91902	0.0549813	-0.0155633	-0.0155633
smri_vol_scs_hpus	dmdtifp1_pc1	A_bl~~B_bl	-0.0253312	0.0121022	-2.09311	0.0363397	-0.0253312	-0.025335
smri_vol_scs_hpus	dmdtifp1_pc1	A_2y~~B_2y	-0.000382595	0.00568583	-0.0672891	0.946352	-0.000382595	-0.000814207
smri_vol_scs_hpus	dmdtifp1_pc1	A_2y~~A_2y	0.491913	0.0084177	58.438	0	0.491913	0.491985
smri_vol_scs_hpus	dmdtifp1_pc1	B_2y~~B_2y	0.44887	0.00768113	58.438	0	0.44887	0.448935
smri_vol_scs_hpus	dmdtifp1_pc1	A_bl~~A_bl	0.999854	0.0171096	58.438	0	0.999854	1
smri_vol_scs_hpus	dmdtifp1_pc1	B_bl~~B_bl	0.999854	0.0171096	58.438	0	0.999854	1
smri_vol_scs_amygdala	dmdtifp1_pc1	A_2y~A_bl	0.548644	0.0100164	54.7748	0	0.548644	0.548644
smri_vol_scs_amygdala	dmdtifp1_pc1	B_2y~B_bl	0.741775	0.00824105	90.0097	0	0.741775	0.741775
smri_vol_scs_amygdala	dmdtifp1_pc1	A_2y~B_bl	0.114458	0.0100164	11.4271	0	0.114458	0.114458
smri_vol_scs_amygdala	dmdtifp1_pc1	B_2y~A_bl	0.0022453	0.00824105	0.272453	0.785274	0.0022453	0.0022453
smri_vol_scs_amygdala	dmdtifp1_pc1	A_bl~~B_bl	0.177912	0.0122884	14.4781	0	0.177912	0.177938
smri_vol_scs_amygdala	dmdtifp1_pc1	A_2y~~B_2y	0.00836224	0.00660568	1.26592	0.205543	0.00836224	0.0153195
smri_vol_scs_amygdala	dmdtifp1_pc1	A_2y~~A_2y	0.663444	0.0113529	58.438	0	0.663444	0.663541
smri_vol_scs_amygdala	dmdtifp1_pc1	B_2y~~B_2y	0.449107	0.00768519	58.438	0	0.449107	0.449173
smri_vol_scs_amygdala	dmdtifp1_pc1	A_bl~~A_bl	0.999854	0.0171096	58.438	0	0.999854	1
smri_vol_scs_amygdala	dmdtifp1_pc1	B_bl~~B_bl	0.999854	0.0171096	58.438	0	0.999854	1
smri_vol_scs_vedc	dmdtifp1_pc1	A_2y~A_bl	0.326103	0.0114455	28.4917	0	0.326103	0.326103
smri_vol_scs_vedc	dmdtifp1_pc1	B_2y~B_bl	0.741537	0.00811397	91.3902	0	0.741537	0.741537
smri_vol_scs_vedc	dmdtifp1_pc1	A_2y~B_bl	-0.0104661	0.0114455	-0.914422	0.360495	-0.0104661	-0.0104661
smri_vol_scs_vedc	dmdtifp1_pc1	B_2y~A_bl	-0.0157716	0.00811397	-1.94376	0.0519243	-0.0157716	-0.0157716
smri_vol_scs_vedc	dmdtifp1_pc1	A_bl~~B_bl	-0.0403984	0.0121082	-3.33644	0.000848577	-0.0403984	-0.0404043
smri_vol_scs_vedc	dmdtifp1_pc1	A_2y~~B_2y	-0.00887425	0.00766213	-1.1582	0.246784	-0.00887425	-0.0140157
smri_vol_scs_vedc	dmdtifp1_pc1	A_2y~~A_2y	0.893141	0.0152836	58.438	0	0.893141	0.893271
smri_vol_scs_vedc	dmdtifp1_pc1	B_2y~~B_2y	0.448863	0.00768102	58.438	0	0.448863	0.448929
smri_vol_scs_vedc	dmdtifp1_pc1	A_bl~~A_bl	0.999854	0.0171096	58.438	0	0.999854	1
smri_vol_scs_vedc	dmdtifp1_pc1	B_bl~~B_bl	0.999854	0.0171096	58.438	0	0.999854	1

## Sheet: SM Table 7
A	B	C	D	ChiSquare	DF	RMSEA	RMSEA_CI_Lower	RMSEA_CI_Upper	CFI	TLI	SRMR
latent_factor_ss_perinatal	dmdtifp1_pc1	smri_area_cdk_bankssts	nihtbx_cryst_uncorrected	0	0	0	0	0	1	1	5.41839e-10
latent_factor_ss_perinatal	dmdtifp1_pc1	smri_area_cdk_cdacate	nihtbx_cryst_uncorrected	0	0	0	0	0	1	1	1.27615e-09
latent_factor_ss_perinatal	dmdtifp1_pc1	smri_area_cdk_cdmdfr	nihtbx_cryst_uncorrected	6.63292e-12	0	0	0	0	1	1	1.67345e-08
latent_factor_ss_perinatal	dmdtifp1_pc1	smri_area_cdk_cuneus	nihtbx_cryst_uncorrected	1.32658e-11	0	0	0	0	1	1	1.52097e-08
latent_factor_ss_perinatal	dmdtifp1_pc1	smri_area_cdk_ehinal	nihtbx_cryst_uncorrected	6.63292e-12	0	0	0	0	1	1	1.49209e-08
latent_factor_ss_perinatal	dmdtifp1_pc1	smri_area_cdk_fusiform	nihtbx_cryst_uncorrected	0	0	0	0	0	1	1	2.12635e-10
latent_factor_ss_perinatal	dmdtifp1_pc1	smri_area_cdk_ifpl	nihtbx_cryst_uncorrected	0	0	0	0	0	1	1	4.18223e-09
latent_factor_ss_perinatal	dmdtifp1_pc1	smri_area_cdk_iftm	nihtbx_cryst_uncorrected	1.32658e-11	0	0	0	0	1	1	1.88323e-08
latent_factor_ss_perinatal	dmdtifp1_pc1	smri_area_cdk_ihcate	nihtbx_cryst_uncorrected	0	0	0	0	0	1	1	1.07981e-08
latent_factor_ss_perinatal	dmdtifp1_pc1	smri_area_cdk_locc	nihtbx_cryst_uncorrected	3.31646e-12	0	0	0	0	1	1	1.42814e-08
latent_factor_ss_perinatal	dmdtifp1_pc1	smri_area_cdk_lobfr	nihtbx_cryst_uncorrected	0	0	0	0	0	1	1	7.07278e-09
latent_factor_ss_perinatal	dmdtifp1_pc1	smri_area_cdk_lingual	nihtbx_cryst_uncorrected	0	0	0	0	0	1	1	5.02544e-09
latent_factor_ss_perinatal	dmdtifp1_pc1	smri_area_cdk_mobfr	nihtbx_cryst_uncorrected	0	0	0	0	0	1	1	1.46645e-09
latent_factor_ss_perinatal	dmdtifp1_pc1	smri_area_cdk_mdtm	nihtbx_cryst_uncorrected	6.63292e-12	0	0	0	0	1	1	1.1668e-08
latent_factor_ss_perinatal	dmdtifp1_pc1	smri_area_cdk_parahpal	nihtbx_cryst_uncorrected	1.32658e-11	0	0	0	0	1	1	1.61725e-08
latent_factor_ss_perinatal	dmdtifp1_pc1	smri_area_cdk_paracn	nihtbx_cryst_uncorrected	1.32658e-11	0	0	0	0	1	1	2.26857e-08
latent_factor_ss_perinatal	dmdtifp1_pc1	smri_area_cdk_parsopc	nihtbx_cryst_uncorrected	0	0	0	0	0	1	1	2.48898e-09
latent_factor_ss_perinatal	dmdtifp1_pc1	smri_area_cdk_parsobis	nihtbx_cryst_uncorrected	0	0	0	0	0	1	1	5.65306e-10
latent_factor_ss_perinatal	dmdtifp1_pc1	smri_area_cdk_parstgris	nihtbx_cryst_uncorrected	6.63292e-12	0	0	0	0	1	1	1.41109e-08
latent_factor_ss_perinatal	dmdtifp1_pc1	smri_area_cdk_pericc	nihtbx_cryst_uncorrected	0	0	0	0	0	1	1	9.30895e-09
latent_factor_ss_perinatal	dmdtifp1_pc1	smri_area_cdk_postcn	nihtbx_cryst_uncorrected	3.31646e-12	0	0	0	0	1	1	6.6985e-09
latent_factor_ss_perinatal	dmdtifp1_pc1	smri_area_cdk_ptcate	nihtbx_cryst_uncorrected	0	0	0	0	0	1	1	5.21257e-09
latent_factor_ss_perinatal	dmdtifp1_pc1	smri_area_cdk_precn	nihtbx_cryst_uncorrected	3.31646e-12	0	0	0	0	1	1	9.45886e-09
latent_factor_ss_perinatal	dmdtifp1_pc1	smri_area_cdk_pc	nihtbx_cryst_uncorrected	6.63292e-12	0	0	0	0	1	1	2.58594e-09
latent_factor_ss_perinatal	dmdtifp1_pc1	smri_area_cdk_rracate	nihtbx_cryst_uncorrected	0	0	0	0	0	1	1	4.23614e-09
latent_factor_ss_perinatal	dmdtifp1_pc1	smri_area_cdk_rrmdfr	nihtbx_cryst_uncorrected	6.63292e-12	0	0	0	0	1	1	2.00948e-08
latent_factor_ss_perinatal	dmdtifp1_pc1	smri_area_cdk_sufr	nihtbx_cryst_uncorrected	6.63292e-12	0	0	0	0	1	1	1.42447e-08
latent_factor_ss_perinatal	dmdtifp1_pc1	smri_area_cdk_supl	nihtbx_cryst_uncorrected	0	0	0	0	0	1	1	3.65501e-10
latent_factor_ss_perinatal	dmdtifp1_pc1	smri_area_cdk_sutm	nihtbx_cryst_uncorrected	1.32658e-11	0	0	0	0	1	1	2.2188e-08
latent_factor_ss_perinatal	dmdtifp1_pc1	smri_area_cdk_sm	nihtbx_cryst_uncorrected	1.32658e-11	0	0	0	0	1	1	2.26533e-08
latent_factor_ss_perinatal	dmdtifp1_pc1	smri_area_cdk_frpole	nihtbx_cryst_uncorrected	0	0	0	0	0	1	1	2.14556e-09
latent_factor_ss_perinatal	dmdtifp1_pc1	smri_area_cdk_tmpole	nihtbx_cryst_uncorrected	1.32658e-11	0	0	0	0	1	1	2.33087e-08
latent_factor_ss_perinatal	dmdtifp1_pc1	smri_area_cdk_trvtm	nihtbx_cryst_uncorrected	0	0	0	0	0	1	1	4.31559e-09
latent_factor_ss_perinatal	dmdtifp1_pc1	smri_area_cdk_insula	nihtbx_cryst_uncorrected	0	0	0	0	0	1	1	1.59343e-09
latent_factor_ss_perinatal	dmdtifp1_pc1	smri_thick_cdk_bankssts	nihtbx_cryst_uncorrected	9.94937e-12	0	0	0	0	1	1	1.61645e-08
latent_factor_ss_perinatal	dmdtifp1_pc1	smri_thick_cdk_cdacate	nihtbx_cryst_uncorrected	0	0	0	0	0	1	1	1.0476e-08
latent_factor_ss_perinatal	dmdtifp1_pc1	smri_thick_cdk_cdmdfr	nihtbx_cryst_uncorrected	6.63292e-12	0	0	0	0	1	1	1.31941e-08
latent_factor_ss_perinatal	dmdtifp1_pc1	smri_thick_cdk_cuneus	nihtbx_cryst_uncorrected	0	0	0	0	0	1	1	2.09638e-09
latent_factor_ss_perinatal	dmdtifp1_pc1	smri_thick_cdk_ehinal	nihtbx_cryst_uncorrected	0	0	0	0	0	1	1	9.35586e-09
latent_factor_ss_perinatal	dmdtifp1_pc1	smri_thick_cdk_fusiform	nihtbx_cryst_uncorrected	9.94937e-12	0	0	0	0	1	1	2.32358e-08
latent_factor_ss_perinatal	dmdtifp1_pc1	smri_thick_cdk_ifpl	nihtbx_cryst_uncorrected	0	0	0	0	0	1	1	9.90955e-09
latent_factor_ss_perinatal	dmdtifp1_pc1	smri_thick_cdk_iftm	nihtbx_cryst_uncorrected	0	0	0	0	0	1	1	2.36402e-09
latent_factor_ss_perinatal	dmdtifp1_pc1	smri_thick_cdk_ihcate	nihtbx_cryst_uncorrected	6.63292e-12	0	0	0	0	1	1	1.93713e-08
latent_factor_ss_perinatal	dmdtifp1_pc1	smri_thick_cdk_locc	nihtbx_cryst_uncorrected	6.63292e-12	0	0	0	0	1	1	1.21984e-08
latent_factor_ss_perinatal	dmdtifp1_pc1	smri_thick_cdk_lobfr	nihtbx_cryst_uncorrected	6.63292e-12	0	0	0	0	1	1	8.82899e-10
latent_factor_ss_perinatal	dmdtifp1_pc1	smri_thick_cdk_lingual	nihtbx_cryst_uncorrected	6.63292e-12	0	0	0	0	1	1	1.20489e-08
latent_factor_ss_perinatal	dmdtifp1_pc1	smri_thick_cdk_mobfr	nihtbx_cryst_uncorrected	3.31646e-12	0	0	0	0	1	1	1.22762e-08
latent_factor_ss_perinatal	dmdtifp1_pc1	smri_thick_cdk_mdtm	nihtbx_cryst_uncorrected	0	0	0	0	0	1	1	2.89181e-09
latent_factor_ss_perinatal	dmdtifp1_pc1	smri_thick_cdk_parahpal	nihtbx_cryst_uncorrected	3.31646e-12	0	0	0	0	1	1	1.07242e-09
latent_factor_ss_perinatal	dmdtifp1_pc1	smri_thick_cdk_paracn	nihtbx_cryst_uncorrected	0	0	0	0	0	1	1	2.75123e-09
latent_factor_ss_perinatal	dmdtifp1_pc1	smri_thick_cdk_parsopc	nihtbx_cryst_uncorrected	0	0	0	0	0	1	1	3.18769e-09
latent_factor_ss_perinatal	dmdtifp1_pc1	smri_thick_cdk_parsobis	nihtbx_cryst_uncorrected	3.31646e-12	0	0	0	0	1	1	1.10212e-08
latent_factor_ss_perinatal	dmdtifp1_pc1	smri_thick_cdk_parstgris	nihtbx_cryst_uncorrected	3.31646e-12	0	0	0	0	1	1	7.43923e-10
latent_factor_ss_perinatal	dmdtifp1_pc1	smri_thick_cdk_pericc	nihtbx_cryst_uncorrected	0	0	0	0	0	1	1	1.11004e-08
latent_factor_ss_perinatal	dmdtifp1_pc1	smri_thick_cdk_postcn	nihtbx_cryst_uncorrected	3.31646e-12	0	0	0	0	1	1	8.2415e-09
latent_factor_ss_perinatal	dmdtifp1_pc1	smri_thick_cdk_ptcate	nihtbx_cryst_uncorrected	3.31646e-12	0	0	0	0	1	1	6.23482e-09
latent_factor_ss_perinatal	dmdtifp1_pc1	smri_thick_cdk_precn	nihtbx_cryst_uncorrected	0	0	0	0	0	1	1	4.64086e-10
latent_factor_ss_perinatal	dmdtifp1_pc1	smri_thick_cdk_pc	nihtbx_cryst_uncorrected	0	0	0	0	0	1	1	1.77515e-09
latent_factor_ss_perinatal	dmdtifp1_pc1	smri_thick_cdk_rracate	nihtbx_cryst_uncorrected	9.94937e-12	0	0	0	0	1	1	1.11495e-08
latent_factor_ss_perinatal	dmdtifp1_pc1	smri_thick_cdk_rrmdfr	nihtbx_cryst_uncorrected	3.31646e-12	0	0	0	0	1	1	6.16791e-09
latent_factor_ss_perinatal	dmdtifp1_pc1	smri_thick_cdk_sufr	nihtbx_cryst_uncorrected	1.32658e-11	0	0	0	0	1	1	2.3258e-08
latent_factor_ss_perinatal	dmdtifp1_pc1	smri_thick_cdk_supl	nihtbx_cryst_uncorrected	0	0	0	0	0	1	1	1.19276e-09
latent_factor_ss_perinatal	dmdtifp1_pc1	smri_thick_cdk_sutm	nihtbx_cryst_uncorrected	0	0	0	0	0	1	1	3.2656e-09
latent_factor_ss_perinatal	dmdtifp1_pc1	smri_thick_cdk_sm	nihtbx_cryst_uncorrected	0	0	0	0	0	1	1	3.47789e-09
latent_factor_ss_perinatal	dmdtifp1_pc1	smri_thick_cdk_frpole	nihtbx_cryst_uncorrected	0	0	0	0	0	1	1	7.69116e-09
latent_factor_ss_perinatal	dmdtifp1_pc1	smri_thick_cdk_tmpole	nihtbx_cryst_uncorrected	3.31646e-12	0	0	0	0	1	1	5.90988e-09
latent_factor_ss_perinatal	dmdtifp1_pc1	smri_thick_cdk_trvtm	nihtbx_cryst_uncorrected	0	0	0	0	0	1	1	1.01259e-08
latent_factor_ss_perinatal	dmdtifp1_pc1	smri_thick_cdk_insula	nihtbx_cryst_uncorrected	6.63292e-12	0	0	0	0	1	1	1.41477e-08
latent_factor_ss_perinatal	dmdtifp1_pc1	smri_vol_scs_cbwmatter	nihtbx_cryst_uncorrected	6.63292e-12	0	0	0	0	1	1	1.40357e-08
latent_factor_ss_perinatal	dmdtifp1_pc1	smri_vol_scs_ltventricle	nihtbx_cryst_uncorrected	0	0	0	0	0	1	1	1.08601e-09
latent_factor_ss_perinatal	dmdtifp1_pc1	smri_vol_scs_inflatvent	nihtbx_cryst_uncorrected	0	0	0	0	0	1	1	4.35115e-09
latent_factor_ss_perinatal	dmdtifp1_pc1	smri_vol_scs_crbwmatter	nihtbx_cryst_uncorrected	6.63292e-12	0	0	0	0	1	1	1.40327e-08
latent_factor_ss_perinatal	dmdtifp1_pc1	smri_vol_scs_crbcortex	nihtbx_cryst_uncorrected	0	0	0	0	0	1	1	2.02438e-09
latent_factor_ss_perinatal	dmdtifp1_pc1	smri_vol_scs_tp	nihtbx_cryst_uncorrected	0	0	0	0	0	1	1	4.61142e-09
latent_factor_ss_perinatal	dmdtifp1_pc1	smri_vol_scs_caudate	nihtbx_cryst_uncorrected	0	0	0	0	0	1	1	2.64133e-09
latent_factor_ss_perinatal	dmdtifp1_pc1	smri_vol_scs_putamen	nihtbx_cryst_uncorrected	0	0	0	0	0	1	1	1.15326e-08
latent_factor_ss_perinatal	dmdtifp1_pc1	smri_vol_scs_pallidum	nihtbx_cryst_uncorrected	0	0	0	0	0	1	1	3.03615e-09
latent_factor_ss_perinatal	dmdtifp1_pc1	smri_vol_scs_hpus	nihtbx_cryst_uncorrected	6.63292e-12	0	0	0	0	1	1	1.18641e-08
latent_factor_ss_perinatal	dmdtifp1_pc1	smri_vol_scs_amygdala	nihtbx_cryst_uncorrected	1.32658e-11	0	0	0	0	1	1	2.56295e-08
latent_factor_ss_perinatal	dmdtifp1_pc1	smri_vol_scs_vedc	nihtbx_cryst_uncorrected	0	0	0	0	0	1	1	5.42074e-09

## Sheet: SM Table 8
A	B	C	D	path	est	se	z	pvalue	std.lv	std.all
latent_factor_ss_perinatal	dmdtifp1_pc1	smri_area_cdk_bankssts	nihtbx_cryst_uncorrected	B_bl~A_bl	-0.0208144	0.0102853	-2.0237	0.0430013	-0.0208144	-0.0330994
latent_factor_ss_perinatal	dmdtifp1_pc1	smri_area_cdk_bankssts	nihtbx_cryst_uncorrected	C_2y~A_bl	0.000627146	0.00138918	0.451449	0.651666	0.000627146	0.00739023
latent_factor_ss_perinatal	dmdtifp1_pc1	smri_area_cdk_bankssts	nihtbx_cryst_uncorrected	C_2y~B_bl	0.00277795	0.00220911	1.2575	0.208573	0.00277795	0.0205853
latent_factor_ss_perinatal	dmdtifp1_pc1	smri_area_cdk_bankssts	nihtbx_cryst_uncorrected	D_2y~A_bl	0.390654	0.123092	3.17367	0.00150523	0.390654	0.0518794
latent_factor_ss_perinatal	dmdtifp1_pc1	smri_area_cdk_bankssts	nihtbx_cryst_uncorrected	D_2y~B_bl	-0.282567	0.195779	-1.44329	0.148938	-0.282567	-0.0235976
latent_factor_ss_perinatal	dmdtifp1_pc1	smri_area_cdk_bankssts	nihtbx_cryst_uncorrected	D_2y~C_2y	0.485641	1.45001	0.334922	0.737684	0.485641	0.00547304
latent_factor_ss_perinatal	dmdtifp1_pc1	smri_area_cdk_bankssts	nihtbx_cryst_uncorrected	B_bl~~B_bl	0.327921	0.00758922	43.2088	0	0.327921	0.998904
latent_factor_ss_perinatal	dmdtifp1_pc1	smri_area_cdk_bankssts	nihtbx_cryst_uncorrected	C_2y~~C_2y	0.00597553	0.000138294	43.2088	0	0.00597553	0.999532
latent_factor_ss_perinatal	dmdtifp1_pc1	smri_area_cdk_bankssts	nihtbx_cryst_uncorrected	D_2y~~D_2y	46.9129	1.08573	43.2088	0	46.9129	0.996642
latent_factor_ss_perinatal	dmdtifp1_pc1	smri_area_cdk_bankssts	nihtbx_cryst_uncorrected	A_bl~~A_bl	0.830153	0	NA	NA	0.830153	1
latent_factor_ss_perinatal	dmdtifp1_pc1	smri_area_cdk_cdacate	nihtbx_cryst_uncorrected	B_bl~A_bl	-0.0208144	0.0102853	-2.0237	0.0430013	-0.0208144	-0.0330994
latent_factor_ss_perinatal	dmdtifp1_pc1	smri_area_cdk_cdacate	nihtbx_cryst_uncorrected	C_2y~A_bl	0.000889132	0.00210598	0.422194	0.672884	0.000889132	0.00691102
latent_factor_ss_perinatal	dmdtifp1_pc1	smri_area_cdk_cdacate	nihtbx_cryst_uncorrected	C_2y~B_bl	0.00465456	0.00334897	1.38985	0.164574	0.00465456	0.0227509
latent_factor_ss_perinatal	dmdtifp1_pc1	smri_area_cdk_cdacate	nihtbx_cryst_uncorrected	D_2y~A_bl	0.392351	0.123049	3.18856	0.00142981	0.392351	0.0521047
latent_factor_ss_perinatal	dmdtifp1_pc1	smri_area_cdk_cdacate	nihtbx_cryst_uncorrected	D_2y~B_bl	-0.27393	0.195721	-1.3996	0.161635	-0.27393	-0.0228763
latent_factor_ss_perinatal	dmdtifp1_pc1	smri_area_cdk_cdacate	nihtbx_cryst_uncorrected	D_2y~C_2y	-1.56568	0.956153	-1.63747	0.101531	-1.56568	-0.0267503
latent_factor_ss_perinatal	dmdtifp1_pc1	smri_area_cdk_cdacate	nihtbx_cryst_uncorrected	B_bl~~B_bl	0.327921	0.00758922	43.2088	0	0.327921	0.998904
latent_factor_ss_perinatal	dmdtifp1_pc1	smri_area_cdk_cdacate	nihtbx_cryst_uncorrected	C_2y~~C_2y	0.013733	0.000317829	43.2088	0	0.013733	0.999445
latent_factor_ss_perinatal	dmdtifp1_pc1	smri_area_cdk_cdacate	nihtbx_cryst_uncorrected	D_2y~~D_2y	46.8807	1.08498	43.2088	0	46.8807	0.995957
latent_factor_ss_perinatal	dmdtifp1_pc1	smri_area_cdk_cdacate	nihtbx_cryst_uncorrected	A_bl~~A_bl	0.830153	0	NA	NA	0.830153	1
latent_factor_ss_perinatal	dmdtifp1_pc1	smri_area_cdk_cdmdfr	nihtbx_cryst_uncorrected	B_bl~A_bl	-0.0208144	0.0102853	-2.0237	0.0430013	-0.0208144	-0.0330994
latent_factor_ss_perinatal	dmdtifp1_pc1	smri_area_cdk_cdmdfr	nihtbx_cryst_uncorrected	C_2y~A_bl	0.000783983	0.00132362	0.592304	0.553647	0.000783983	0.0096967
latent_factor_ss_perinatal	dmdtifp1_pc1	smri_area_cdk_cdmdfr	nihtbx_cryst_uncorrected	C_2y~B_bl	-0.00193014	0.00210484	-0.917004	0.35914	-0.00193014	-0.0150124
latent_factor_ss_perinatal	dmdtifp1_pc1	smri_area_cdk_cdmdfr	nihtbx_cryst_uncorrected	D_2y~A_bl	0.390214	0.12309	3.17015	0.0015236	0.390214	0.0518209
latent_factor_ss_perinatal	dmdtifp1_pc1	smri_area_cdk_cdmdfr	nihtbx_cryst_uncorrected	D_2y~B_bl	-0.279384	0.195752	-1.42723	0.153514	-0.279384	-0.0233317
latent_factor_ss_perinatal	dmdtifp1_pc1	smri_area_cdk_cdmdfr	nihtbx_cryst_uncorrected	D_2y~C_2y	0.950205	1.52178	0.624402	0.532364	0.950205	0.0102024
latent_factor_ss_perinatal	dmdtifp1_pc1	smri_area_cdk_cdmdfr	nihtbx_cryst_uncorrected	B_bl~~B_bl	0.327921	0.00758922	43.2088	0	0.327921	0.998904
latent_factor_ss_perinatal	dmdtifp1_pc1	smri_area_cdk_cdmdfr	nihtbx_cryst_uncorrected	C_2y~~C_2y	0.00542476	0.000125548	43.2088	0	0.00542476	0.999671
latent_factor_ss_perinatal	dmdtifp1_pc1	smri_area_cdk_cdmdfr	nihtbx_cryst_uncorrected	D_2y~~D_2y	46.9095	1.08565	43.2088	0	46.9095	0.996568
latent_factor_ss_perinatal	dmdtifp1_pc1	smri_area_cdk_cdmdfr	nihtbx_cryst_uncorrected	A_bl~~A_bl	0.830153	0	NA	NA	0.830153	1
latent_factor_ss_perinatal	dmdtifp1_pc1	smri_area_cdk_cuneus	nihtbx_cryst_uncorrected	B_bl~A_bl	-0.0208144	0.0102853	-2.0237	0.0430013	-0.0208144	-0.0330994
latent_factor_ss_perinatal	dmdtifp1_pc1	smri_area_cdk_cuneus	nihtbx_cryst_uncorrected	C_2y~A_bl	0.000259316	0.000799897	0.324187	0.745797	0.000259316	0.00530796
latent_factor_ss_perinatal	dmdtifp1_pc1	smri_area_cdk_cuneus	nihtbx_cryst_uncorrected	C_2y~B_bl	-0.000574841	0.00127201	-0.451916	0.651329	-0.000574841	-0.00739929
latent_factor_ss_perinatal	dmdtifp1_pc1	smri_area_cdk_cuneus	nihtbx_cryst_uncorrected	D_2y~A_bl	0.390825	0.123092	3.17507	0.00149799	0.390825	0.051902
latent_factor_ss_perinatal	dmdtifp1_pc1	smri_area_cdk_cuneus	nihtbx_cryst_uncorrected	D_2y~B_bl	-0.280922	0.195745	-1.43514	0.151246	-0.280922	-0.0234602
latent_factor_ss_perinatal	dmdtifp1_pc1	smri_area_cdk_cuneus	nihtbx_cryst_uncorrected	D_2y~C_2y	0.515701	2.51826	0.204784	0.837741	0.515701	0.00334582
latent_factor_ss_perinatal	dmdtifp1_pc1	smri_area_cdk_cuneus	nihtbx_cryst_uncorrected	B_bl~~B_bl	0.327921	0.00758922	43.2088	0	0.327921	0.998904
latent_factor_ss_perinatal	dmdtifp1_pc1	smri_area_cdk_cuneus	nihtbx_cryst_uncorrected	C_2y~~C_2y	0.00198118	4.58513e-05	43.2088	0	0.00198118	0.999914
latent_factor_ss_perinatal	dmdtifp1_pc1	smri_area_cdk_cuneus	nihtbx_cryst_uncorrected	D_2y~~D_2y	46.9138	1.08575	43.2088	0	46.9138	0.996661
latent_factor_ss_perinatal	dmdtifp1_pc1	smri_area_cdk_cuneus	nihtbx_cryst_uncorrected	A_bl~~A_bl	0.830153	0	NA	NA	0.830153	1
latent_factor_ss_perinatal	dmdtifp1_pc1	smri_area_cdk_ehinal	nihtbx_cryst_uncorrected	B_bl~A_bl	-0.0208144	0.0102853	-2.0237	0.0430013	-0.0208144	-0.0330994
latent_factor_ss_perinatal	dmdtifp1_pc1	smri_area_cdk_ehinal	nihtbx_cryst_uncorrected	C_2y~A_bl	0.00275565	0.0016887	1.63182	0.102718	0.00275565	0.0266974
latent_factor_ss_perinatal	dmdtifp1_pc1	smri_area_cdk_ehinal	nihtbx_cryst_uncorrected	C_2y~B_bl	-0.00483033	0.0026854	-1.79874	0.0720605	-0.00483033	-0.0294282
latent_factor_ss_perinatal	dmdtifp1_pc1	smri_area_cdk_ehinal	nihtbx_cryst_uncorrected	D_2y~A_bl	0.384811	0.123077	3.12659	0.00176845	0.384811	0.0511034
latent_factor_ss_perinatal	dmdtifp1_pc1	smri_area_cdk_ehinal	nihtbx_cryst_uncorrected	D_2y~B_bl	-0.270442	0.195734	-1.38168	0.167069	-0.270442	-0.022585
latent_factor_ss_perinatal	dmdtifp1_pc1	smri_area_cdk_ehinal	nihtbx_cryst_uncorrected	D_2y~C_2y	2.23091	1.19229	1.87111	0.0613293	2.23091	0.0305802
latent_factor_ss_perinatal	dmdtifp1_pc1	smri_area_cdk_ehinal	nihtbx_cryst_uncorrected	B_bl~~B_bl	0.327921	0.00758922	43.2088	0	0.327921	0.998904
latent_factor_ss_perinatal	dmdtifp1_pc1	smri_area_cdk_ehinal	nihtbx_cryst_uncorrected	C_2y~~C_2y	0.00883002	0.000204357	43.2088	0	0.00883002	0.998369
latent_factor_ss_perinatal	dmdtifp1_pc1	smri_area_cdk_ehinal	nihtbx_cryst_uncorrected	D_2y~~D_2y	46.8704	1.08474	43.2088	0	46.8704	0.995738
latent_factor_ss_perinatal	dmdtifp1_pc1	smri_area_cdk_ehinal	nihtbx_cryst_uncorrected	A_bl~~A_bl	0.830153	0	NA	NA	0.830153	1
latent_factor_ss_perinatal	dmdtifp1_pc1	smri_area_cdk_fusiform	nihtbx_cryst_uncorrected	B_bl~A_bl	-0.0208144	0.0102853	-2.0237	0.0430013	-0.0208144	-0.0330994
latent_factor_ss_perinatal	dmdtifp1_pc1	smri_area_cdk_fusiform	nihtbx_cryst_uncorrected	C_2y~A_bl	-9.44016e-05	0.000741924	-0.127239	0.898751	-9.44016e-05	-0.00208338
latent_factor_ss_perinatal	dmdtifp1_pc1	smri_area_cdk_fusiform	nihtbx_cryst_uncorrected	C_2y~B_bl	-0.000190316	0.00117982	-0.16131	0.871849	-0.000190316	-0.00264125
latent_factor_ss_perinatal	dmdtifp1_pc1	smri_area_cdk_fusiform	nihtbx_cryst_uncorrected	D_2y~A_bl	0.39102	0.12309	3.1767	0.0014896	0.39102	0.0519279
latent_factor_ss_perinatal	dmdtifp1_pc1	smri_area_cdk_fusiform	nihtbx_cryst_uncorrected	D_2y~B_bl	-0.281094	0.19574	-1.43606	0.150985	-0.281094	-0.0234746
latent_factor_ss_perinatal	dmdtifp1_pc1	smri_area_cdk_fusiform	nihtbx_cryst_uncorrected	D_2y~C_2y	0.648637	2.71503	0.238906	0.811179	0.648637	0.00390314
latent_factor_ss_perinatal	dmdtifp1_pc1	smri_area_cdk_fusiform	nihtbx_cryst_uncorrected	B_bl~~B_bl	0.327921	0.00758922	43.2088	0	0.327921	0.998904
latent_factor_ss_perinatal	dmdtifp1_pc1	smri_area_cdk_fusiform	nihtbx_cryst_uncorrected	C_2y~~C_2y	0.00170441	3.9446e-05	43.2088	0	0.00170441	0.999989
latent_factor_ss_perinatal	dmdtifp1_pc1	smri_area_cdk_fusiform	nihtbx_cryst_uncorrected	D_2y~~D_2y	46.9136	1.08574	43.2088	0	46.9136	0.996657
latent_factor_ss_perinatal	dmdtifp1_pc1	smri_area_cdk_fusiform	nihtbx_cryst_uncorrected	A_bl~~A_bl	0.830153	0	NA	NA	0.830153	1
latent_factor_ss_perinatal	dmdtifp1_pc1	smri_area_cdk_ifpl	nihtbx_cryst_uncorrected	B_bl~A_bl	-0.0208144	0.0102853	-2.0237	0.0430013	-0.0208144	-0.0330994
latent_factor_ss_perinatal	dmdtifp1_pc1	smri_area_cdk_ifpl	nihtbx_cryst_uncorrected	C_2y~A_bl	0.000224963	0.000941372	0.238974	0.811126	0.000224963	0.00391283
latent_factor_ss_perinatal	dmdtifp1_pc1	smri_area_cdk_ifpl	nihtbx_cryst_uncorrected	C_2y~B_bl	-0.000490249	0.00149699	-0.327491	0.743297	-0.000490249	-0.00536216
latent_factor_ss_perinatal	dmdtifp1_pc1	smri_area_cdk_ifpl	nihtbx_cryst_uncorrected	D_2y~A_bl	0.391212	0.123087	3.17834	0.00148123	0.391212	0.0519534
latent_factor_ss_perinatal	dmdtifp1_pc1	smri_area_cdk_ifpl	nihtbx_cryst_uncorrected	D_2y~B_bl	-0.281769	0.195736	-1.43954	0.149999	-0.281769	-0.023531
latent_factor_ss_perinatal	dmdtifp1_pc1	smri_area_cdk_ifpl	nihtbx_cryst_uncorrected	D_2y~C_2y	-1.12468	2.13974	-0.525616	0.599155	-1.12468	-0.0085872
latent_factor_ss_perinatal	dmdtifp1_pc1	smri_area_cdk_ifpl	nihtbx_cryst_uncorrected	B_bl~~B_bl	0.327921	0.00758922	43.2088	0	0.327921	0.998904
latent_factor_ss_perinatal	dmdtifp1_pc1	smri_area_cdk_ifpl	nihtbx_cryst_uncorrected	C_2y~~C_2y	0.00274397	6.35048e-05	43.2088	0	0.00274397	0.999955
latent_factor_ss_perinatal	dmdtifp1_pc1	smri_area_cdk_ifpl	nihtbx_cryst_uncorrected	D_2y~~D_2y	46.9109	1.08568	43.2088	0	46.9109	0.996598
latent_factor_ss_perinatal	dmdtifp1_pc1	smri_area_cdk_ifpl	nihtbx_cryst_uncorrected	A_bl~~A_bl	0.830153	0	NA	NA	0.830153	1
latent_factor_ss_perinatal	dmdtifp1_pc1	smri_area_cdk_iftm	nihtbx_cryst_uncorrected	B_bl~A_bl	-0.0208144	0.0102853	-2.0237	0.0430013	-0.0208144	-0.0330994
latent_factor_ss_perinatal	dmdtifp1_pc1	smri_area_cdk_iftm	nihtbx_cryst_uncorrected	C_2y~A_bl	0.00276006	0.000902143	3.05945	0.00221746	0.00276006	0.0500317
latent_factor_ss_perinatal	dmdtifp1_pc1	smri_area_cdk_iftm	nihtbx_cryst_uncorrected	C_2y~B_bl	-0.000285594	0.0014346	-0.199075	0.842204	-0.000285594	-0.00325551
latent_factor_ss_perinatal	dmdtifp1_pc1	smri_area_cdk_iftm	nihtbx_cryst_uncorrected	D_2y~A_bl	0.395728	0.123235	3.21117	0.00132196	0.395728	0.0525532
latent_factor_ss_perinatal	dmdtifp1_pc1	smri_area_cdk_iftm	nihtbx_cryst_uncorrected	D_2y~B_bl	-0.281711	0.195726	-1.43932	0.150061	-0.281711	-0.0235261
latent_factor_ss_perinatal	dmdtifp1_pc1	smri_area_cdk_iftm	nihtbx_cryst_uncorrected	D_2y~C_2y	-1.72796	2.23269	-0.773937	0.438968	-1.72796	-0.0126593
latent_factor_ss_perinatal	dmdtifp1_pc1	smri_area_cdk_iftm	nihtbx_cryst_uncorrected	B_bl~~B_bl	0.327921	0.00758922	43.2088	0	0.327921	0.998904
latent_factor_ss_perinatal	dmdtifp1_pc1	smri_area_cdk_iftm	nihtbx_cryst_uncorrected	C_2y~~C_2y	0.00252004	5.83223e-05	43.2088	0	0.00252004	0.997475
latent_factor_ss_perinatal	dmdtifp1_pc1	smri_area_cdk_iftm	nihtbx_cryst_uncorrected	D_2y~~D_2y	46.9068	1.08559	43.2088	0	46.9068	0.996512
latent_factor_ss_perinatal	dmdtifp1_pc1	smri_area_cdk_iftm	nihtbx_cryst_uncorrected	A_bl~~A_bl	0.830153	0	NA	NA	0.830153	1
latent_factor_ss_perinatal	dmdtifp1_pc1	smri_area_cdk_ihcate	nihtbx_cryst_uncorrected	B_bl~A_bl	-0.0208144	0.0102853	-2.0237	0.0430013	-0.0208144	-0.0330994
latent_factor_ss_perinatal	dmdtifp1_pc1	smri_area_cdk_ihcate	nihtbx_cryst_uncorrected	C_2y~A_bl	-0.000595491	0.00107124	-0.555891	0.578285	-0.000595491	-0.00910161
latent_factor_ss_perinatal	dmdtifp1_pc1	smri_area_cdk_ihcate	nihtbx_cryst_uncorrected	C_2y~B_bl	-0.000518061	0.0017035	-0.304116	0.76104	-0.000518061	-0.00497929
latent_factor_ss_perinatal	dmdtifp1_pc1	smri_area_cdk_ihcate	nihtbx_cryst_uncorrected	D_2y~A_bl	0.39	0.123084	3.16858	0.00153184	0.39	0.0517926
latent_factor_ss_perinatal	dmdtifp1_pc1	smri_area_cdk_ihcate	nihtbx_cryst_uncorrected	D_2y~B_bl	-0.282051	0.195724	-1.44107	0.149566	-0.282051	-0.0235545
latent_factor_ss_perinatal	dmdtifp1_pc1	smri_area_cdk_ihcate	nihtbx_cryst_uncorrected	D_2y~C_2y	-1.60896	1.88022	-0.855727	0.392149	-1.60896	-0.0139799
latent_factor_ss_perinatal	dmdtifp1_pc1	smri_area_cdk_ihcate	nihtbx_cryst_uncorrected	B_bl~~B_bl	0.327921	0.00758922	43.2088	0	0.327921	0.998904
latent_factor_ss_perinatal	dmdtifp1_pc1	smri_area_cdk_ihcate	nihtbx_cryst_uncorrected	C_2y~~C_2y	0.00355326	8.22347e-05	43.2088	0	0.00355326	0.999895
latent_factor_ss_perinatal	dmdtifp1_pc1	smri_area_cdk_ihcate	nihtbx_cryst_uncorrected	D_2y~~D_2y	46.9052	1.08555	43.2088	0	46.9052	0.996477
latent_factor_ss_perinatal	dmdtifp1_pc1	smri_area_cdk_ihcate	nihtbx_cryst_uncorrected	A_bl~~A_bl	0.830153	0	NA	NA	0.830153	1
latent_factor_ss_perinatal	dmdtifp1_pc1	smri_area_cdk_locc	nihtbx_cryst_uncorrected	B_bl~A_bl	-0.0208144	0.0102853	-2.0237	0.0430013	-0.0208144	-0.0330994
latent_factor_ss_perinatal	dmdtifp1_pc1	smri_area_cdk_locc	nihtbx_cryst_uncorrected	C_2y~A_bl	-0.000339466	0.000765867	-0.443244	0.657589	-0.000339466	-0.00724852
latent_factor_ss_perinatal	dmdtifp1_pc1	smri_area_cdk_locc	nihtbx_cryst_uncorrected	C_2y~B_bl	-0.00370602	0.00121789	-3.04297	0.00234252	-0.00370602	-0.0497628
latent_factor_ss_perinatal	dmdtifp1_pc1	smri_area_cdk_locc	nihtbx_cryst_uncorrected	D_2y~A_bl	0.389889	0.12307	3.16802	0.0015348	0.389889	0.0517777
latent_factor_ss_perinatal	dmdtifp1_pc1	smri_area_cdk_locc	nihtbx_cryst_uncorrected	D_2y~B_bl	-0.292897	0.195946	-1.49479	0.13497	-0.292897	-0.0244602
latent_factor_ss_perinatal	dmdtifp1_pc1	smri_area_cdk_locc	nihtbx_cryst_uncorrected	D_2y~C_2y	-3.15141	2.62967	-1.19841	0.230758	-3.15141	-0.0196
latent_factor_ss_perinatal	dmdtifp1_pc1	smri_area_cdk_locc	nihtbx_cryst_uncorrected	B_bl~~B_bl	0.327921	0.00758922	43.2088	0	0.327921	0.998904
latent_factor_ss_perinatal	dmdtifp1_pc1	smri_area_cdk_locc	nihtbx_cryst_uncorrected	C_2y~~C_2y	0.0018162	4.20331e-05	43.2088	0	0.0018162	0.997495
latent_factor_ss_perinatal	dmdtifp1_pc1	smri_area_cdk_locc	nihtbx_cryst_uncorrected	D_2y~~D_2y	46.8963	1.08534	43.2088	0	46.8963	0.996289
latent_factor_ss_perinatal	dmdtifp1_pc1	smri_area_cdk_locc	nihtbx_cryst_uncorrected	A_bl~~A_bl	0.830153	0	NA	NA	0.830153	1
latent_factor_ss_perinatal	dmdtifp1_pc1	smri_area_cdk_lobfr	nihtbx_cryst_uncorrected	B_bl~A_bl	-0.0208144	0.0102853	-2.0237	0.0430013	-0.0208144	-0.0330994
latent_factor_ss_perinatal	dmdtifp1_pc1	smri_area_cdk_lobfr	nihtbx_cryst_uncorrected	C_2y~A_bl	-0.00173714	0.000488013	-3.55962	0.00037139	-0.00173714	-0.0569161
latent_factor_ss_perinatal	dmdtifp1_pc1	smri_area_cdk_lobfr	nihtbx_cryst_uncorrected	C_2y~B_bl	0.00999338	0.000776046	12.8773	0	0.00999338	0.2059
latent_factor_ss_perinatal	dmdtifp1_pc1	smri_area_cdk_lobfr	nihtbx_cryst_uncorrected	D_2y~A_bl	0.378662	0.123251	3.07229	0.00212422	0.378662	0.0502868
latent_factor_ss_perinatal	dmdtifp1_pc1	smri_area_cdk_lobfr	nihtbx_cryst_uncorrected	D_2y~B_bl	-0.210478	0.199961	-1.05259	0.292527	-0.210478	-0.0175773
latent_factor_ss_perinatal	dmdtifp1_pc1	smri_area_cdk_lobfr	nihtbx_cryst_uncorrected	D_2y~C_2y	-7.07869	4.12606	-1.71561	0.0862341	-7.07869	-0.0286916
latent_factor_ss_perinatal	dmdtifp1_pc1	smri_area_cdk_lobfr	nihtbx_cryst_uncorrected	B_bl~~B_bl	0.327921	0.00758922	43.2088	0	0.327921	0.998904
latent_factor_ss_perinatal	dmdtifp1_pc1	smri_area_cdk_lobfr	nihtbx_cryst_uncorrected	C_2y~~C_2y	0.000737426	1.70666e-05	43.2088	0	0.000737426	0.95359
latent_factor_ss_perinatal	dmdtifp1_pc1	smri_area_cdk_lobfr	nihtbx_cryst_uncorrected	D_2y~~D_2y	46.8774	1.0849	43.2088	0	46.8774	0.995887
latent_factor_ss_perinatal	dmdtifp1_pc1	smri_area_cdk_lobfr	nihtbx_cryst_uncorrected	A_bl~~A_bl	0.830153	0	NA	NA	0.830153	1
latent_factor_ss_perinatal	dmdtifp1_pc1	smri_area_cdk_lingual	nihtbx_cryst_uncorrected	B_bl~A_bl	-0.0208144	0.0102853	-2.0237	0.0430013	-0.0208144	-0.0330994
latent_factor_ss_perinatal	dmdtifp1_pc1	smri_area_cdk_lingual	nihtbx_cryst_uncorrected	C_2y~A_bl	-0.000313075	0.000765221	-0.409131	0.682444	-0.000313075	-0.00669508
latent_factor_ss_perinatal	dmdtifp1_pc1	smri_area_cdk_lingual	nihtbx_cryst_uncorrected	C_2y~B_bl	-0.00252629	0.00121687	-2.07606	0.0378885	-0.00252629	-0.033973
latent_factor_ss_perinatal	dmdtifp1_pc1	smri_area_cdk_lingual	nihtbx_cryst_uncorrected	D_2y~A_bl	0.392288	0.12305	3.18803	0.00143245	0.392288	0.0520964
latent_factor_ss_perinatal	dmdtifp1_pc1	smri_area_cdk_lingual	nihtbx_cryst_uncorrected	D_2y~B_bl	-0.270487	0.195785	-1.38155	0.16711	-0.270487	-0.0225888
latent_factor_ss_perinatal	dmdtifp1_pc1	smri_area_cdk_lingual	nihtbx_cryst_uncorrected	D_2y~C_2y	4.24765	2.63147	1.61417	0.10649	4.24765	0.0263781
latent_factor_ss_perinatal	dmdtifp1_pc1	smri_area_cdk_lingual	nihtbx_cryst_uncorrected	B_bl~~B_bl	0.327921	0.00758922	43.2088	0	0.327921	0.998904
latent_factor_ss_perinatal	dmdtifp1_pc1	smri_area_cdk_lingual	nihtbx_cryst_uncorrected	C_2y~~C_2y	0.00181314	4.19622e-05	43.2088	0	0.00181314	0.998816
latent_factor_ss_perinatal	dmdtifp1_pc1	smri_area_cdk_lingual	nihtbx_cryst_uncorrected	D_2y~~D_2y	46.8816	1.085	43.2088	0	46.8816	0.995977
latent_factor_ss_perinatal	dmdtifp1_pc1	smri_area_cdk_lingual	nihtbx_cryst_uncorrected	A_bl~~A_bl	0.830153	0	NA	NA	0.830153	1
latent_factor_ss_perinatal	dmdtifp1_pc1	smri_area_cdk_mobfr	nihtbx_cryst_uncorrected	B_bl~A_bl	-0.0208144	0.0102853	-2.0237	0.0430013	-0.0208144	-0.0330994
latent_factor_ss_perinatal	dmdtifp1_pc1	smri_area_cdk_mobfr	nihtbx_cryst_uncorrected	C_2y~A_bl	-0.00117356	0.000790468	-1.48464	0.13764	-0.00117356	-0.0242828
latent_factor_ss_perinatal	dmdtifp1_pc1	smri_area_cdk_mobfr	nihtbx_cryst_uncorrected	C_2y~B_bl	-0.00311924	0.00125702	-2.48147	0.0130842	-0.00311924	-0.0405871
latent_factor_ss_perinatal	dmdtifp1_pc1	smri_area_cdk_mobfr	nihtbx_cryst_uncorrected	D_2y~A_bl	0.392971	0.123119	3.19179	0.00141396	0.392971	0.052187
latent_factor_ss_perinatal	dmdtifp1_pc1	smri_area_cdk_mobfr	nihtbx_cryst_uncorrected	D_2y~B_bl	-0.275869	0.19589	-1.40829	0.159046	-0.275869	-0.0230382
latent_factor_ss_perinatal	dmdtifp1_pc1	smri_area_cdk_mobfr	nihtbx_cryst_uncorrected	D_2y~C_2y	1.71467	2.54816	0.672906	0.501007	1.71467	0.011005
latent_factor_ss_perinatal	dmdtifp1_pc1	smri_area_cdk_mobfr	nihtbx_cryst_uncorrected	B_bl~~B_bl	0.327921	0.00758922	43.2088	0	0.327921	0.998904
latent_factor_ss_perinatal	dmdtifp1_pc1	smri_area_cdk_mobfr	nihtbx_cryst_uncorrected	C_2y~~C_2y	0.00193475	4.47767e-05	43.2088	0	0.00193475	0.997828
latent_factor_ss_perinatal	dmdtifp1_pc1	smri_area_cdk_mobfr	nihtbx_cryst_uncorrected	D_2y~~D_2y	46.9087	1.08563	43.2088	0	46.9087	0.996551
latent_factor_ss_perinatal	dmdtifp1_pc1	smri_area_cdk_mobfr	nihtbx_cryst_uncorrected	A_bl~~A_bl	0.830153	0	NA	NA	0.830153	1
latent_factor_ss_perinatal	dmdtifp1_pc1	smri_area_cdk_mdtm	nihtbx_cryst_uncorrected	B_bl~A_bl	-0.0208144	0.0102853	-2.0237	0.0430014	-0.0208144	-0.0330994
latent_factor_ss_perinatal	dmdtifp1_pc1	smri_area_cdk_mdtm	nihtbx_cryst_uncorrected	C_2y~A_bl	-0.000387939	0.000602563	-0.643815	0.519695	-0.000387939	-0.0105325
latent_factor_ss_perinatal	dmdtifp1_pc1	smri_area_cdk_mdtm	nihtbx_cryst_uncorrected	C_2y~B_bl	0.00234544	0.000958206	2.44774	0.0143754	0.00234544	0.0400441
latent_factor_ss_perinatal	dmdtifp1_pc1	smri_area_cdk_mdtm	nihtbx_cryst_uncorrected	D_2y~A_bl	0.388795	0.123051	3.15961	0.00157981	0.388795	0.0516324
latent_factor_ss_perinatal	dmdtifp1_pc1	smri_area_cdk_mdtm	nihtbx_cryst_uncorrected	D_2y~B_bl	-0.268134	0.195825	-1.36926	0.170919	-0.268134	-0.0223923
latent_factor_ss_perinatal	dmdtifp1_pc1	smri_area_cdk_mdtm	nihtbx_cryst_uncorrected	D_2y~C_2y	-5.57832	3.34174	-1.66928	0.095061	-5.57832	-0.0272858
latent_factor_ss_perinatal	dmdtifp1_pc1	smri_area_cdk_mdtm	nihtbx_cryst_uncorrected	B_bl~~B_bl	0.327921	0.00758922	43.2088	0	0.327921	0.998904
latent_factor_ss_perinatal	dmdtifp1_pc1	smri_area_cdk_mdtm	nihtbx_cryst_uncorrected	C_2y~~C_2y	0.00112425	2.60189e-05	43.2088	0	0.00112425	0.998258
latent_factor_ss_perinatal	dmdtifp1_pc1	smri_area_cdk_mdtm	nihtbx_cryst_uncorrected	D_2y~~D_2y	46.8794	1.08495	43.2088	0	46.8794	0.995929
latent_factor_ss_perinatal	dmdtifp1_pc1	smri_area_cdk_mdtm	nihtbx_cryst_uncorrected	A_bl~~A_bl	0.830153	0	NA	NA	0.830153	1
latent_factor_ss_perinatal	dmdtifp1_pc1	smri_area_cdk_parahpal	nihtbx_cryst_uncorrected	B_bl~A_bl	-0.0208144	0.0102853	-2.0237	0.0430013	-0.0208144	-0.0330994
latent_factor_ss_perinatal	dmdtifp1_pc1	smri_area_cdk_parahpal	nihtbx_cryst_uncorrected	C_2y~A_bl	-0.00220784	0.000974905	-2.26467	0.0235328	-0.00220784	-0.0370545
latent_factor_ss_perinatal	dmdtifp1_pc1	smri_area_cdk_parahpal	nihtbx_cryst_uncorrected	C_2y~B_bl	0.000715743	0.00155031	0.461678	0.644313	0.000715743	0.00755396
latent_factor_ss_perinatal	dmdtifp1_pc1	smri_area_cdk_parahpal	nihtbx_cryst_uncorrected	D_2y~A_bl	0.391009	0.123175	3.17442	0.00150138	0.391009	0.0519265
latent_factor_ss_perinatal	dmdtifp1_pc1	smri_area_cdk_parahpal	nihtbx_cryst_uncorrected	D_2y~B_bl	-0.281234	0.195746	-1.43673	0.150795	-0.281234	-0.0234863
latent_factor_ss_perinatal	dmdtifp1_pc1	smri_area_cdk_parahpal	nihtbx_cryst_uncorrected	D_2y~C_2y	0.022863	2.06621	0.0110652	0.991171	0.022863	0.00018091
latent_factor_ss_perinatal	dmdtifp1_pc1	smri_area_cdk_parahpal	nihtbx_cryst_uncorrected	B_bl~~B_bl	0.327921	0.00758922	43.2088	0	0.327921	0.998904
latent_factor_ss_perinatal	dmdtifp1_pc1	smri_area_cdk_parahpal	nihtbx_cryst_uncorrected	C_2y~~C_2y	0.00294293	6.81096e-05	43.2088	0	0.00294293	0.998551
latent_factor_ss_perinatal	dmdtifp1_pc1	smri_area_cdk_parahpal	nihtbx_cryst_uncorrected	D_2y~~D_2y	46.9143	1.08576	43.2088	0	46.9143	0.996672
latent_factor_ss_perinatal	dmdtifp1_pc1	smri_area_cdk_parahpal	nihtbx_cryst_uncorrected	A_bl~~A_bl	0.830153	0	NA	NA	0.830153	1
latent_factor_ss_perinatal	dmdtifp1_pc1	smri_area_cdk_paracn	nihtbx_cryst_uncorrected	B_bl~A_bl	-0.0208144	0.0102853	-2.0237	0.0430013	-0.0208144	-0.0330994
latent_factor_ss_perinatal	dmdtifp1_pc1	smri_area_cdk_paracn	nihtbx_cryst_uncorrected	C_2y~A_bl	-0.00184307	0.00104739	-1.75968	0.0784612	-0.00184307	-0.0287958
latent_factor_ss_perinatal	dmdtifp1_pc1	smri_area_cdk_paracn	nihtbx_cryst_uncorrected	C_2y~B_bl	0.00182408	0.00166557	1.09516	0.273445	0.00182408	0.0179214
latent_factor_ss_perinatal	dmdtifp1_pc1	smri_area_cdk_paracn	nihtbx_cryst_uncorrected	D_2y~A_bl	0.394299	0.123127	3.20238	0.00136298	0.394299	0.0523634
latent_factor_ss_perinatal	dmdtifp1_pc1	smri_area_cdk_paracn	nihtbx_cryst_uncorrected	D_2y~B_bl	-0.284524	0.195749	-1.45351	0.146081	-0.284524	-0.023761
latent_factor_ss_perinatal	dmdtifp1_pc1	smri_area_cdk_paracn	nihtbx_cryst_uncorrected	D_2y~C_2y	1.81233	1.923	0.942453	0.345961	1.81233	0.0154047
latent_factor_ss_perinatal	dmdtifp1_pc1	smri_area_cdk_paracn	nihtbx_cryst_uncorrected	B_bl~~B_bl	0.327921	0.00758922	43.2088	0	0.327921	0.998904
latent_factor_ss_perinatal	dmdtifp1_pc1	smri_area_cdk_paracn	nihtbx_cryst_uncorrected	C_2y~~C_2y	0.00339681	7.86138e-05	43.2088	0	0.00339681	0.998815
latent_factor_ss_perinatal	dmdtifp1_pc1	smri_area_cdk_paracn	nihtbx_cryst_uncorrected	D_2y~~D_2y	46.9032	1.0855	43.2088	0	46.9032	0.996435
latent_factor_ss_perinatal	dmdtifp1_pc1	smri_area_cdk_paracn	nihtbx_cryst_uncorrected	A_bl~~A_bl	0.830153	0	NA	NA	0.830153	1
latent_factor_ss_perinatal	dmdtifp1_pc1	smri_area_cdk_parsopc	nihtbx_cryst_uncorrected	B_bl~A_bl	-0.0208144	0.0102853	-2.0237	0.0430013	-0.0208144	-0.0330994
latent_factor_ss_perinatal	dmdtifp1_pc1	smri_area_cdk_parsopc	nihtbx_cryst_uncorrected	C_2y~A_bl	-0.00149903	0.0012129	-1.23591	0.216492	-0.00149903	-0.0202318
latent_factor_ss_perinatal	dmdtifp1_pc1	smri_area_cdk_parsopc	nihtbx_cryst_uncorrected	C_2y~B_bl	-0.000999685	0.00192877	-0.5183	0.604249	-0.000999685	-0.00848458
latent_factor_ss_perinatal	dmdtifp1_pc1	smri_area_cdk_parsopc	nihtbx_cryst_uncorrected	D_2y~A_bl	0.392692	0.123108	3.18983	0.00142358	0.392692	0.0521501
latent_factor_ss_perinatal	dmdtifp1_pc1	smri_area_cdk_parsopc	nihtbx_cryst_uncorrected	D_2y~B_bl	-0.280062	0.195735	-1.43082	0.152482	-0.280062	-0.0233883
latent_factor_ss_perinatal	dmdtifp1_pc1	smri_area_cdk_parsopc	nihtbx_cryst_uncorrected	D_2y~C_2y	1.15666	1.66067	0.696499	0.486116	1.15666	0.0113811
latent_factor_ss_perinatal	dmdtifp1_pc1	smri_area_cdk_parsopc	nihtbx_cryst_uncorrected	B_bl~~B_bl	0.327921	0.00758922	43.2088	0	0.327921	0.998904
latent_factor_ss_perinatal	dmdtifp1_pc1	smri_area_cdk_parsopc	nihtbx_cryst_uncorrected	C_2y~~C_2y	0.00455519	0.000105423	43.2088	0	0.00455519	0.99953
latent_factor_ss_perinatal	dmdtifp1_pc1	smri_area_cdk_parsopc	nihtbx_cryst_uncorrected	D_2y~~D_2y	46.9083	1.08562	43.2088	0	46.9083	0.996543
latent_factor_ss_perinatal	dmdtifp1_pc1	smri_area_cdk_parsopc	nihtbx_cryst_uncorrected	A_bl~~A_bl	0.830153	0	NA	NA	0.830153	1
latent_factor_ss_perinatal	dmdtifp1_pc1	smri_area_cdk_parsobis	nihtbx_cryst_uncorrected	B_bl~A_bl	-0.0208144	0.0102853	-2.0237	0.0430013	-0.0208144	-0.0330994
latent_factor_ss_perinatal	dmdtifp1_pc1	smri_area_cdk_parsobis	nihtbx_cryst_uncorrected	C_2y~A_bl	-0.00111255	0.000920239	-1.20898	0.22667	-0.00111255	-0.0197918
latent_factor_ss_perinatal	dmdtifp1_pc1	smri_area_cdk_parsobis	nihtbx_cryst_uncorrected	C_2y~B_bl	-0.000241302	0.00146338	-0.164894	0.869028	-0.000241302	-0.00269941
latent_factor_ss_perinatal	dmdtifp1_pc1	smri_area_cdk_parsobis	nihtbx_cryst_uncorrected	D_2y~A_bl	0.389947	0.123112	3.16742	0.00153797	0.389947	0.0517855
latent_factor_ss_perinatal	dmdtifp1_pc1	smri_area_cdk_parsobis	nihtbx_cryst_uncorrected	D_2y~B_bl	-0.281437	0.195737	-1.43783	0.150481	-0.281437	-0.0235032
latent_factor_ss_perinatal	dmdtifp1_pc1	smri_area_cdk_parsobis	nihtbx_cryst_uncorrected	D_2y~C_2y	-0.909158	2.1889	-0.415348	0.677887	-0.909158	-0.00678699
latent_factor_ss_perinatal	dmdtifp1_pc1	smri_area_cdk_parsobis	nihtbx_cryst_uncorrected	B_bl~~B_bl	0.327921	0.00758922	43.2088	0	0.327921	0.998904
latent_factor_ss_perinatal	dmdtifp1_pc1	smri_area_cdk_parsobis	nihtbx_cryst_uncorrected	C_2y~~C_2y	0.00262215	6.06856e-05	43.2088	0	0.00262215	0.999605
latent_factor_ss_perinatal	dmdtifp1_pc1	smri_area_cdk_parsobis	nihtbx_cryst_uncorrected	D_2y~~D_2y	46.9122	1.08571	43.2088	0	46.9122	0.996626
latent_factor_ss_perinatal	dmdtifp1_pc1	smri_area_cdk_parsobis	nihtbx_cryst_uncorrected	A_bl~~A_bl	0.830153	0	NA	NA	0.830153	1
latent_factor_ss_perinatal	dmdtifp1_pc1	smri_area_cdk_parstgris	nihtbx_cryst_uncorrected	B_bl~A_bl	-0.0208144	0.0102853	-2.0237	0.0430013	-0.0208144	-0.0330994
latent_factor_ss_perinatal	dmdtifp1_pc1	smri_area_cdk_parstgris	nihtbx_cryst_uncorrected	C_2y~A_bl	-0.000830865	0.00119519	-0.695173	0.486947	-0.000830865	-0.0113819
latent_factor_ss_perinatal	dmdtifp1_pc1	smri_area_cdk_parstgris	nihtbx_cryst_uncorrected	C_2y~B_bl	-0.000419152	0.00190061	-0.220535	0.825455	-0.000419152	-0.00361075
latent_factor_ss_perinatal	dmdtifp1_pc1	smri_area_cdk_parstgris	nihtbx_cryst_uncorrected	D_2y~A_bl	0.389986	0.123091	3.16829	0.00153341	0.389986	0.0517907
latent_factor_ss_perinatal	dmdtifp1_pc1	smri_area_cdk_parstgris	nihtbx_cryst_uncorrected	D_2y~B_bl	-0.281709	0.195729	-1.43928	0.150072	-0.281709	-0.0235259
latent_factor_ss_perinatal	dmdtifp1_pc1	smri_area_cdk_parstgris	nihtbx_cryst_uncorrected	D_2y~C_2y	-1.17034	1.68528	-0.694449	0.487401	-1.17034	-0.0113457
latent_factor_ss_perinatal	dmdtifp1_pc1	smri_area_cdk_parstgris	nihtbx_cryst_uncorrected	B_bl~~B_bl	0.327921	0.00758922	43.2088	0	0.327921	0.998904
latent_factor_ss_perinatal	dmdtifp1_pc1	smri_area_cdk_parstgris	nihtbx_cryst_uncorrected	C_2y~~C_2y	0.00442315	0.000102367	43.2088	0	0.00442315	0.99986
latent_factor_ss_perinatal	dmdtifp1_pc1	smri_area_cdk_parstgris	nihtbx_cryst_uncorrected	D_2y~~D_2y	46.9083	1.08562	43.2088	0	46.9083	0.996543
latent_factor_ss_perinatal	dmdtifp1_pc1	smri_area_cdk_parstgris	nihtbx_cryst_uncorrected	A_bl~~A_bl	0.830153	0	NA	NA	0.830153	1
latent_factor_ss_perinatal	dmdtifp1_pc1	smri_area_cdk_pericc	nihtbx_cryst_uncorrected	B_bl~A_bl	-0.0208144	0.0102853	-2.0237	0.0430013	-0.0208144	-0.0330994
latent_factor_ss_perinatal	dmdtifp1_pc1	smri_area_cdk_pericc	nihtbx_cryst_uncorrected	C_2y~A_bl	8.40711e-05	0.000738084	0.113905	0.909313	8.40711e-05	0.00186505
latent_factor_ss_perinatal	dmdtifp1_pc1	smri_area_cdk_pericc	nihtbx_cryst_uncorrected	C_2y~B_bl	-2.49944e-05	0.00117371	-0.0212951	0.98301	-2.49944e-05	-0.000348683
latent_factor_ss_perinatal	dmdtifp1_pc1	smri_area_cdk_pericc	nihtbx_cryst_uncorrected	D_2y~A_bl	0.390819	0.123085	3.17521	0.0014973	0.390819	0.0519013
latent_factor_ss_perinatal	dmdtifp1_pc1	smri_area_cdk_pericc	nihtbx_cryst_uncorrected	D_2y~B_bl	-0.281176	0.195731	-1.43655	0.150847	-0.281176	-0.0234814
latent_factor_ss_perinatal	dmdtifp1_pc1	smri_area_cdk_pericc	nihtbx_cryst_uncorrected	D_2y~C_2y	1.65639	2.72904	0.60695	0.543884	1.65639	0.00991565
latent_factor_ss_perinatal	dmdtifp1_pc1	smri_area_cdk_pericc	nihtbx_cryst_uncorrected	B_bl~~B_bl	0.327921	0.00758922	43.2088	0	0.327921	0.998904
latent_factor_ss_perinatal	dmdtifp1_pc1	smri_area_cdk_pericc	nihtbx_cryst_uncorrected	C_2y~~C_2y	0.00168682	3.90387e-05	43.2088	0	0.00168682	0.999996
latent_factor_ss_perinatal	dmdtifp1_pc1	smri_area_cdk_pericc	nihtbx_cryst_uncorrected	D_2y~~D_2y	46.9097	1.08565	43.2088	0	46.9097	0.996574
latent_factor_ss_perinatal	dmdtifp1_pc1	smri_area_cdk_pericc	nihtbx_cryst_uncorrected	A_bl~~A_bl	0.830153	0	NA	NA	0.830153	1
latent_factor_ss_perinatal	dmdtifp1_pc1	smri_area_cdk_postcn	nihtbx_cryst_uncorrected	B_bl~A_bl	-0.0208144	0.0102853	-2.0237	0.0430013	-0.0208144	-0.0330994
latent_factor_ss_perinatal	dmdtifp1_pc1	smri_area_cdk_postcn	nihtbx_cryst_uncorrected	C_2y~A_bl	0.000197766	0.000728996	0.271286	0.786171	0.000197766	0.00444148
latent_factor_ss_perinatal	dmdtifp1_pc1	smri_area_cdk_postcn	nihtbx_cryst_uncorrected	C_2y~B_bl	-0.00101639	0.00115926	-0.87676	0.380617	-0.00101639	-0.0143543
latent_factor_ss_perinatal	dmdtifp1_pc1	smri_area_cdk_postcn	nihtbx_cryst_uncorrected	D_2y~A_bl	0.391091	0.123091	3.17725	0.00148677	0.391091	0.0519373
latent_factor_ss_perinatal	dmdtifp1_pc1	smri_area_cdk_postcn	nihtbx_cryst_uncorrected	D_2y~B_bl	-0.281897	0.195759	-1.44002	0.149862	-0.281897	-0.0235416
latent_factor_ss_perinatal	dmdtifp1_pc1	smri_area_cdk_postcn	nihtbx_cryst_uncorrected	D_2y~C_2y	-0.667897	2.76318	-0.241713	0.809002	-0.667897	-0.00394945
latent_factor_ss_perinatal	dmdtifp1_pc1	smri_area_cdk_postcn	nihtbx_cryst_uncorrected	B_bl~~B_bl	0.327921	0.00758922	43.2088	0	0.327921	0.998904
latent_factor_ss_perinatal	dmdtifp1_pc1	smri_area_cdk_postcn	nihtbx_cryst_uncorrected	C_2y~~C_2y	0.00164553	3.80833e-05	43.2088	0	0.00164553	0.99977
latent_factor_ss_perinatal	dmdtifp1_pc1	smri_area_cdk_postcn	nihtbx_cryst_uncorrected	D_2y~~D_2y	46.9136	1.08574	43.2088	0	46.9136	0.996656
latent_factor_ss_perinatal	dmdtifp1_pc1	smri_area_cdk_postcn	nihtbx_cryst_uncorrected	A_bl~~A_bl	0.830153	0	NA	NA	0.830153	1
latent_factor_ss_perinatal	dmdtifp1_pc1	smri_area_cdk_ptcate	nihtbx_cryst_uncorrected	B_bl~A_bl	-0.0208144	0.0102853	-2.0237	0.0430013	-0.0208144	-0.0330994
latent_factor_ss_perinatal	dmdtifp1_pc1	smri_area_cdk_ptcate	nihtbx_cryst_uncorrected	C_2y~A_bl	0.00125078	0.00124991	1.0007	0.316974	0.00125078	0.0163797
latent_factor_ss_perinatal	dmdtifp1_pc1	smri_area_cdk_ptcate	nihtbx_cryst_uncorrected	C_2y~B_bl	0.0025109	0.00198762	1.26327	0.206492	0.0025109	0.0206776
latent_factor_ss_perinatal	dmdtifp1_pc1	smri_area_cdk_ptcate	nihtbx_cryst_uncorrected	D_2y~A_bl	0.392038	0.123102	3.18465	0.00144928	0.392038	0.0520632
latent_factor_ss_perinatal	dmdtifp1_pc1	smri_area_cdk_ptcate	nihtbx_cryst_uncorrected	D_2y~B_bl	-0.279051	0.195775	-1.42536	0.154052	-0.279051	-0.0233039
latent_factor_ss_perinatal	dmdtifp1_pc1	smri_area_cdk_ptcate	nihtbx_cryst_uncorrected	D_2y~C_2y	-0.863111	1.61155	-0.535579	0.59225	-0.863111	-0.0087527
latent_factor_ss_perinatal	dmdtifp1_pc1	smri_area_cdk_ptcate	nihtbx_cryst_uncorrected	B_bl~~B_bl	0.327921	0.00758922	43.2088	0	0.327921	0.998904
latent_factor_ss_perinatal	dmdtifp1_pc1	smri_area_cdk_ptcate	nihtbx_cryst_uncorrected	C_2y~~C_2y	0.0048374	0.000111954	43.2088	0	0.0048374	0.999327
latent_factor_ss_perinatal	dmdtifp1_pc1	smri_area_cdk_ptcate	nihtbx_cryst_uncorrected	D_2y~~D_2y	46.9107	1.08568	43.2088	0	46.9107	0.996596
latent_factor_ss_perinatal	dmdtifp1_pc1	smri_area_cdk_ptcate	nihtbx_cryst_uncorrected	A_bl~~A_bl	0.830153	0	NA	NA	0.830153	1
latent_factor_ss_perinatal	dmdtifp1_pc1	smri_area_cdk_precn	nihtbx_cryst_uncorrected	B_bl~A_bl	-0.0208144	0.0102853	-2.0237	0.0430013	-0.0208144	-0.0330994
latent_factor_ss_perinatal	dmdtifp1_pc1	smri_area_cdk_precn	nihtbx_cryst_uncorrected	C_2y~A_bl	0.000722279	0.000683463	1.05679	0.290606	0.000722279	0.0172988
latent_factor_ss_perinatal	dmdtifp1_pc1	smri_area_cdk_precn	nihtbx_cryst_uncorrected	C_2y~B_bl	-0.00105398	0.00108685	-0.969755	0.332168	-0.00105398	-0.0158741
latent_factor_ss_perinatal	dmdtifp1_pc1	smri_area_cdk_precn	nihtbx_cryst_uncorrected	D_2y~A_bl	0.387748	0.123071	3.15059	0.0016294	0.387748	0.0514934
latent_factor_ss_perinatal	dmdtifp1_pc1	smri_area_cdk_precn	nihtbx_cryst_uncorrected	D_2y~B_bl	-0.276532	0.195706	-1.413	0.157655	-0.276532	-0.0230936
latent_factor_ss_perinatal	dmdtifp1_pc1	smri_area_cdk_precn	nihtbx_cryst_uncorrected	D_2y~C_2y	4.44532	2.94639	1.50873	0.131367	4.44532	0.0246487
latent_factor_ss_perinatal	dmdtifp1_pc1	smri_area_cdk_precn	nihtbx_cryst_uncorrected	B_bl~~B_bl	0.327921	0.00758922	43.2088	0	0.327921	0.998904
latent_factor_ss_perinatal	dmdtifp1_pc1	smri_area_cdk_precn	nihtbx_cryst_uncorrected	C_2y~~C_2y	0.00144639	3.34745e-05	43.2088	0	0.00144639	0.999431
latent_factor_ss_perinatal	dmdtifp1_pc1	smri_area_cdk_precn	nihtbx_cryst_uncorrected	D_2y~~D_2y	46.8858	1.0851	43.2088	0	46.8858	0.996065
latent_factor_ss_perinatal	dmdtifp1_pc1	smri_area_cdk_precn	nihtbx_cryst_uncorrected	A_bl~~A_bl	0.830153	0	NA	NA	0.830153	1
latent_factor_ss_perinatal	dmdtifp1_pc1	smri_area_cdk_pc	nihtbx_cryst_uncorrected	B_bl~A_bl	-0.0208144	0.0102853	-2.0237	0.0430013	-0.0208144	-0.0330994
latent_factor_ss_perinatal	dmdtifp1_pc1	smri_area_cdk_pc	nihtbx_cryst_uncorrected	C_2y~A_bl	0.00155272	0.000680076	2.28315	0.0224215	0.00155272	0.0373576
latent_factor_ss_perinatal	dmdtifp1_pc1	smri_area_cdk_pc	nihtbx_cryst_uncorrected	C_2y~B_bl	-0.000168808	0.00108147	-0.156092	0.875961	-0.000168808	-0.00255402
latent_factor_ss_perinatal	dmdtifp1_pc1	smri_area_cdk_pc	nihtbx_cryst_uncorrected	D_2y~A_bl	0.401456	0.12309	3.26147	0.00110836	0.401456	0.0533139
latent_factor_ss_perinatal	dmdtifp1_pc1	smri_area_cdk_pc	nihtbx_cryst_uncorrected	D_2y~B_bl	-0.282359	0.195605	-1.44352	0.148874	-0.282359	-0.0235802
latent_factor_ss_perinatal	dmdtifp1_pc1	smri_area_cdk_pc	nihtbx_cryst_uncorrected	D_2y~C_2y	-6.7607	2.9599	-2.2841	0.0223656	-6.7607	-0.037317
latent_factor_ss_perinatal	dmdtifp1_pc1	smri_area_cdk_pc	nihtbx_cryst_uncorrected	B_bl~~B_bl	0.327921	0.00758922	43.2088	0	0.327921	0.998904
latent_factor_ss_perinatal	dmdtifp1_pc1	smri_area_cdk_pc	nihtbx_cryst_uncorrected	C_2y~~C_2y	0.00143209	3.31436e-05	43.2088	0	0.00143209	0.998592
latent_factor_ss_perinatal	dmdtifp1_pc1	smri_area_cdk_pc	nihtbx_cryst_uncorrected	D_2y~~D_2y	46.8489	1.08424	43.2088	0	46.8489	0.995281
latent_factor_ss_perinatal	dmdtifp1_pc1	smri_area_cdk_pc	nihtbx_cryst_uncorrected	A_bl~~A_bl	0.830153	0	NA	NA	0.830153	1
latent_factor_ss_perinatal	dmdtifp1_pc1	smri_area_cdk_rracate	nihtbx_cryst_uncorrected	B_bl~A_bl	-0.0208144	0.0102853	-2.0237	0.0430013	-0.0208144	-0.0330994
latent_factor_ss_perinatal	dmdtifp1_pc1	smri_area_cdk_rracate	nihtbx_cryst_uncorrected	C_2y~A_bl	0.00199833	0.00155186	1.2877	0.197852	0.00199833	0.0210794
latent_factor_ss_perinatal	dmdtifp1_pc1	smri_area_cdk_rracate	nihtbx_cryst_uncorrected	C_2y~B_bl	0.00108402	0.0024678	0.439269	0.660467	0.00108402	0.00719077
latent_factor_ss_perinatal	dmdtifp1_pc1	smri_area_cdk_rracate	nihtbx_cryst_uncorrected	D_2y~A_bl	0.398594	0.122975	3.24126	0.00119003	0.398594	0.0529338
latent_factor_ss_perinatal	dmdtifp1_pc1	smri_area_cdk_rracate	nihtbx_cryst_uncorrected	D_2y~B_bl	-0.277076	0.195519	-1.41713	0.156444	-0.277076	-0.023139
latent_factor_ss_perinatal	dmdtifp1_pc1	smri_area_cdk_rracate	nihtbx_cryst_uncorrected	D_2y~C_2y	-3.82071	1.29652	-2.94689	0.00320992	-3.82071	-0.0481009
latent_factor_ss_perinatal	dmdtifp1_pc1	smri_area_cdk_rracate	nihtbx_cryst_uncorrected	B_bl~~B_bl	0.327921	0.00758922	43.2088	0	0.327921	0.998904
latent_factor_ss_perinatal	dmdtifp1_pc1	smri_area_cdk_rracate	nihtbx_cryst_uncorrected	C_2y~~C_2y	0.00745696	0.00017258	43.2088	0	0.00745696	0.999514
latent_factor_ss_perinatal	dmdtifp1_pc1	smri_area_cdk_rracate	nihtbx_cryst_uncorrected	D_2y~~D_2y	46.8055	1.08324	43.2088	0	46.8055	0.994359
latent_factor_ss_perinatal	dmdtifp1_pc1	smri_area_cdk_rracate	nihtbx_cryst_uncorrected	A_bl~~A_bl	0.830153	0	NA	NA	0.830153	1
latent_factor_ss_perinatal	dmdtifp1_pc1	smri_area_cdk_rrmdfr	nihtbx_cryst_uncorrected	B_bl~A_bl	-0.0208144	0.0102853	-2.0237	0.0430013	-0.0208144	-0.0330994
latent_factor_ss_perinatal	dmdtifp1_pc1	smri_area_cdk_rrmdfr	nihtbx_cryst_uncorrected	C_2y~A_bl	-0.00127213	0.000733512	-1.7343	0.0828651	-0.00127213	-0.0283737
latent_factor_ss_perinatal	dmdtifp1_pc1	smri_area_cdk_rrmdfr	nihtbx_cryst_uncorrected	C_2y~B_bl	0.00201015	0.00116644	1.72331	0.0848322	0.00201015	0.0281939
latent_factor_ss_perinatal	dmdtifp1_pc1	smri_area_cdk_rrmdfr	nihtbx_cryst_uncorrected	D_2y~A_bl	0.397192	0.123088	3.22691	0.00125137	0.397192	0.0527476
latent_factor_ss_perinatal	dmdtifp1_pc1	smri_area_cdk_rrmdfr	nihtbx_cryst_uncorrected	D_2y~B_bl	-0.291067	0.195735	-1.48705	0.137002	-0.291067	-0.0243074
latent_factor_ss_perinatal	dmdtifp1_pc1	smri_area_cdk_rrmdfr	nihtbx_cryst_uncorrected	D_2y~C_2y	4.89989	2.74502	1.78501	0.0742594	4.89989	0.0291745
latent_factor_ss_perinatal	dmdtifp1_pc1	smri_area_cdk_rrmdfr	nihtbx_cryst_uncorrected	B_bl~~B_bl	0.327921	0.00758922	43.2088	0	0.327921	0.998904
latent_factor_ss_perinatal	dmdtifp1_pc1	smri_area_cdk_rrmdfr	nihtbx_cryst_uncorrected	C_2y~~C_2y	0.00166598	3.85566e-05	43.2088	0	0.00166598	0.998347
latent_factor_ss_perinatal	dmdtifp1_pc1	smri_area_cdk_rrmdfr	nihtbx_cryst_uncorrected	D_2y~~D_2y	46.8744	1.08483	43.2088	0	46.8744	0.995822
latent_factor_ss_perinatal	dmdtifp1_pc1	smri_area_cdk_rrmdfr	nihtbx_cryst_uncorrected	A_bl~~A_bl	0.830153	0	NA	NA	0.830153	1
latent_factor_ss_perinatal	dmdtifp1_pc1	smri_area_cdk_sufr	nihtbx_cryst_uncorrected	B_bl~A_bl	-0.0208144	0.0102853	-2.0237	0.0430013	-0.0208144	-0.0330994
latent_factor_ss_perinatal	dmdtifp1_pc1	smri_area_cdk_sufr	nihtbx_cryst_uncorrected	C_2y~A_bl	0.000135361	0.00065029	0.208154	0.835109	0.000135361	0.00340734
latent_factor_ss_perinatal	dmdtifp1_pc1	smri_area_cdk_sufr	nihtbx_cryst_uncorrected	C_2y~B_bl	-0.00146626	0.0010341	-1.41791	0.156218	-0.00146626	-0.0232101
latent_factor_ss_perinatal	dmdtifp1_pc1	smri_area_cdk_sufr	nihtbx_cryst_uncorrected	D_2y~A_bl	0.390762	0.123088	3.17466	0.0015001	0.390762	0.0518937
latent_factor_ss_perinatal	dmdtifp1_pc1	smri_area_cdk_sufr	nihtbx_cryst_uncorrected	D_2y~B_bl	-0.279085	0.195788	-1.42545	0.154028	-0.279085	-0.0233068
latent_factor_ss_perinatal	dmdtifp1_pc1	smri_area_cdk_sufr	nihtbx_cryst_uncorrected	D_2y~C_2y	1.45471	3.09754	0.469632	0.638618	1.45471	0.00767459
latent_factor_ss_perinatal	dmdtifp1_pc1	smri_area_cdk_sufr	nihtbx_cryst_uncorrected	B_bl~~B_bl	0.327921	0.00758922	43.2088	0	0.327921	0.998904
latent_factor_ss_perinatal	dmdtifp1_pc1	smri_area_cdk_sufr	nihtbx_cryst_uncorrected	C_2y~~C_2y	0.0013094	3.03039e-05	43.2088	0	0.0013094	0.999444
latent_factor_ss_perinatal	dmdtifp1_pc1	smri_area_cdk_sufr	nihtbx_cryst_uncorrected	D_2y~~D_2y	46.9116	1.0857	43.2088	0	46.9116	0.996613
latent_factor_ss_perinatal	dmdtifp1_pc1	smri_area_cdk_sufr	nihtbx_cryst_uncorrected	A_bl~~A_bl	0.830153	0	NA	NA	0.830153	1
latent_factor_ss_perinatal	dmdtifp1_pc1	smri_area_cdk_supl	nihtbx_cryst_uncorrected	B_bl~A_bl	-0.0208144	0.0102853	-2.0237	0.0430013	-0.0208144	-0.0330994
latent_factor_ss_perinatal	dmdtifp1_pc1	smri_area_cdk_supl	nihtbx_cryst_uncorrected	C_2y~A_bl	0.000174772	0.000744701	0.234687	0.814451	0.000174772	0.00384258
latent_factor_ss_perinatal	dmdtifp1_pc1	smri_area_cdk_supl	nihtbx_cryst_uncorrected	C_2y~B_bl	0.000605945	0.00118424	0.511676	0.608878	0.000605945	0.00837776
latent_factor_ss_perinatal	dmdtifp1_pc1	smri_area_cdk_supl	nihtbx_cryst_uncorrected	D_2y~A_bl	0.391087	0.12309	3.17724	0.00148685	0.391087	0.0519369
latent_factor_ss_perinatal	dmdtifp1_pc1	smri_area_cdk_supl	nihtbx_cryst_uncorrected	D_2y~B_bl	-0.280772	0.195746	-1.43437	0.151466	-0.280772	-0.0234477
latent_factor_ss_perinatal	dmdtifp1_pc1	smri_area_cdk_supl	nihtbx_cryst_uncorrected	D_2y~C_2y	-0.735226	2.7049	-0.271813	0.785766	-0.735226	-0.00444091
latent_factor_ss_perinatal	dmdtifp1_pc1	smri_area_cdk_supl	nihtbx_cryst_uncorrected	B_bl~~B_bl	0.327921	0.00758922	43.2088	0	0.327921	0.998904
latent_factor_ss_perinatal	dmdtifp1_pc1	smri_area_cdk_supl	nihtbx_cryst_uncorrected	C_2y~~C_2y	0.0017172	3.97418e-05	43.2088	0	0.0017172	0.999917
latent_factor_ss_perinatal	dmdtifp1_pc1	smri_area_cdk_supl	nihtbx_cryst_uncorrected	D_2y~~D_2y	46.9134	1.08574	43.2088	0	46.9134	0.996652
latent_factor_ss_perinatal	dmdtifp1_pc1	smri_area_cdk_supl	nihtbx_cryst_uncorrected	A_bl~~A_bl	0.830153	0	NA	NA	0.830153	1
latent_factor_ss_perinatal	dmdtifp1_pc1	smri_area_cdk_sutm	nihtbx_cryst_uncorrected	B_bl~A_bl	-0.0208144	0.0102853	-2.0237	0.0430013	-0.0208144	-0.0330994
latent_factor_ss_perinatal	dmdtifp1_pc1	smri_area_cdk_sutm	nihtbx_cryst_uncorrected	C_2y~A_bl	-0.000155263	0.000642032	-0.241831	0.808911	-0.000155263	-0.00395948
latent_factor_ss_perinatal	dmdtifp1_pc1	smri_area_cdk_sutm	nihtbx_cryst_uncorrected	C_2y~B_bl	0.000621817	0.00102097	0.609045	0.542494	0.000621817	0.00997183
latent_factor_ss_perinatal	dmdtifp1_pc1	smri_area_cdk_sutm	nihtbx_cryst_uncorrected	D_2y~A_bl	0.391649	0.123058	3.18263	0.00145944	0.391649	0.0520115
latent_factor_ss_perinatal	dmdtifp1_pc1	smri_area_cdk_sutm	nihtbx_cryst_uncorrected	D_2y~B_bl	-0.283983	0.195698	-1.45113	0.146743	-0.283983	-0.0237159
latent_factor_ss_perinatal	dmdtifp1_pc1	smri_area_cdk_sutm	nihtbx_cryst_uncorrected	D_2y~C_2y	4.44726	3.13664	1.41784	0.156237	4.44726	0.0231593
latent_factor_ss_perinatal	dmdtifp1_pc1	smri_area_cdk_sutm	nihtbx_cryst_uncorrected	B_bl~~B_bl	0.327921	0.00758922	43.2088	0	0.327921	0.998904
latent_factor_ss_perinatal	dmdtifp1_pc1	smri_area_cdk_sutm	nihtbx_cryst_uncorrected	C_2y~~C_2y	0.00127635	2.95391e-05	43.2088	0	0.00127635	0.999882
latent_factor_ss_perinatal	dmdtifp1_pc1	smri_area_cdk_sutm	nihtbx_cryst_uncorrected	D_2y~~D_2y	46.8891	1.08518	43.2088	0	46.8891	0.996136
latent_factor_ss_perinatal	dmdtifp1_pc1	smri_area_cdk_sutm	nihtbx_cryst_uncorrected	A_bl~~A_bl	0.830153	0	NA	NA	0.830153	1
latent_factor_ss_perinatal	dmdtifp1_pc1	smri_area_cdk_sm	nihtbx_cryst_uncorrected	B_bl~A_bl	-0.0208144	0.0102853	-2.0237	0.0430013	-0.0208144	-0.0330994
latent_factor_ss_perinatal	dmdtifp1_pc1	smri_area_cdk_sm	nihtbx_cryst_uncorrected	C_2y~A_bl	-0.000456692	0.00118411	-0.385684	0.699731	-0.000456692	-0.00631499
latent_factor_ss_perinatal	dmdtifp1_pc1	smri_area_cdk_sm	nihtbx_cryst_uncorrected	C_2y~B_bl	-0.000214711	0.00188299	-0.114026	0.909217	-0.000214711	-0.00186701
latent_factor_ss_perinatal	dmdtifp1_pc1	smri_area_cdk_sm	nihtbx_cryst_uncorrected	D_2y~A_bl	0.391682	0.123079	3.18237	0.00146075	0.391682	0.0520159
latent_factor_ss_perinatal	dmdtifp1_pc1	smri_area_cdk_sm	nihtbx_cryst_uncorrected	D_2y~B_bl	-0.280878	0.195718	-1.43511	0.151255	-0.280878	-0.0234565
latent_factor_ss_perinatal	dmdtifp1_pc1	smri_area_cdk_sm	nihtbx_cryst_uncorrected	D_2y~C_2y	1.58406	1.70096	0.931269	0.351714	1.58406	0.0152133
latent_factor_ss_perinatal	dmdtifp1_pc1	smri_area_cdk_sm	nihtbx_cryst_uncorrected	B_bl~~B_bl	0.327921	0.00758922	43.2088	0	0.327921	0.998904
latent_factor_ss_perinatal	dmdtifp1_pc1	smri_area_cdk_sm	nihtbx_cryst_uncorrected	C_2y~~C_2y	0.0043415	0.000100477	43.2088	0	0.0043415	0.999957
latent_factor_ss_perinatal	dmdtifp1_pc1	smri_area_cdk_sm	nihtbx_cryst_uncorrected	D_2y~~D_2y	46.9035	1.08551	43.2088	0	46.9035	0.996441
latent_factor_ss_perinatal	dmdtifp1_pc1	smri_area_cdk_sm	nihtbx_cryst_uncorrected	A_bl~~A_bl	0.830153	0	NA	NA	0.830153	1
latent_factor_ss_perinatal	dmdtifp1_pc1	smri_area_cdk_frpole	nihtbx_cryst_uncorrected	B_bl~A_bl	-0.0208144	0.0102853	-2.0237	0.0430013	-0.0208144	-0.0330994
latent_factor_ss_perinatal	dmdtifp1_pc1	smri_area_cdk_frpole	nihtbx_cryst_uncorrected	C_2y~A_bl	-0.000762965	0.00107397	-0.710416	0.477446	-0.000762965	-0.0116245
latent_factor_ss_perinatal	dmdtifp1_pc1	smri_area_cdk_frpole	nihtbx_cryst_uncorrected	C_2y~B_bl	0.00356158	0.00170784	2.08543	0.0370305	0.00356158	0.0341238
latent_factor_ss_perinatal	dmdtifp1_pc1	smri_area_cdk_frpole	nihtbx_cryst_uncorrected	D_2y~A_bl	0.390958	0.123099	3.17597	0.00149337	0.390958	0.0519198
latent_factor_ss_perinatal	dmdtifp1_pc1	smri_area_cdk_frpole	nihtbx_cryst_uncorrected	D_2y~B_bl	-0.281216	0.195855	-1.43584	0.151047	-0.281216	-0.0234848
latent_factor_ss_perinatal	dmdtifp1_pc1	smri_area_cdk_frpole	nihtbx_cryst_uncorrected	D_2y~C_2y	-0.000385358	1.87562	-0.000205456	0.999836	-0.000385358	-3.35889e-06
latent_factor_ss_perinatal	dmdtifp1_pc1	smri_area_cdk_frpole	nihtbx_cryst_uncorrected	B_bl~~B_bl	0.327921	0.00758922	43.2088	0	0.327921	0.998904
latent_factor_ss_perinatal	dmdtifp1_pc1	smri_area_cdk_frpole	nihtbx_cryst_uncorrected	C_2y~~C_2y	0.00357141	8.26548e-05	43.2088	0	0.00357141	0.998674
latent_factor_ss_perinatal	dmdtifp1_pc1	smri_area_cdk_frpole	nihtbx_cryst_uncorrected	D_2y~~D_2y	46.9144	1.08576	43.2088	0	46.9144	0.996672
latent_factor_ss_perinatal	dmdtifp1_pc1	smri_area_cdk_frpole	nihtbx_cryst_uncorrected	A_bl~~A_bl	0.830153	0	NA	NA	0.830153	1
latent_factor_ss_perinatal	dmdtifp1_pc1	smri_area_cdk_tmpole	nihtbx_cryst_uncorrected	B_bl~A_bl	-0.0208144	0.0102853	-2.0237	0.0430014	-0.0208144	-0.0330994
latent_factor_ss_perinatal	dmdtifp1_pc1	smri_area_cdk_tmpole	nihtbx_cryst_uncorrected	C_2y~A_bl	0.00252555	0.00100978	2.50109	0.012381	0.00252555	0.0408968
latent_factor_ss_perinatal	dmdtifp1_pc1	smri_area_cdk_tmpole	nihtbx_cryst_uncorrected	C_2y~B_bl	-0.00305213	0.00160576	-1.90073	0.0573371	-0.00305213	-0.0310799
latent_factor_ss_perinatal	dmdtifp1_pc1	smri_area_cdk_tmpole	nihtbx_cryst_uncorrected	D_2y~A_bl	0.380927	0.123128	3.09374	0.0019765	0.380927	0.0505876
latent_factor_ss_perinatal	dmdtifp1_pc1	smri_area_cdk_tmpole	nihtbx_cryst_uncorrected	D_2y~B_bl	-0.269094	0.195731	-1.37481	0.169189	-0.269094	-0.0224724
latent_factor_ss_perinatal	dmdtifp1_pc1	smri_area_cdk_tmpole	nihtbx_cryst_uncorrected	D_2y~C_2y	3.97218	1.9938	1.99227	0.0463418	3.97218	0.032576
latent_factor_ss_perinatal	dmdtifp1_pc1	smri_area_cdk_tmpole	nihtbx_cryst_uncorrected	B_bl~~B_bl	0.327921	0.00758922	43.2088	0	0.327921	0.998904
latent_factor_ss_perinatal	dmdtifp1_pc1	smri_area_cdk_tmpole	nihtbx_cryst_uncorrected	C_2y~~C_2y	0.00315724	7.30693e-05	43.2088	0	0.00315724	0.997277
latent_factor_ss_perinatal	dmdtifp1_pc1	smri_area_cdk_tmpole	nihtbx_cryst_uncorrected	D_2y~~D_2y	46.8645	1.08461	43.2088	0	46.8645	0.995614
latent_factor_ss_perinatal	dmdtifp1_pc1	smri_area_cdk_tmpole	nihtbx_cryst_uncorrected	A_bl~~A_bl	0.830153	0	NA	NA	0.830153	1
latent_factor_ss_perinatal	dmdtifp1_pc1	smri_area_cdk_trvtm	nihtbx_cryst_uncorrected	B_bl~A_bl	-0.0208144	0.0102853	-2.0237	0.0430013	-0.0208144	-0.0330994
latent_factor_ss_perinatal	dmdtifp1_pc1	smri_area_cdk_trvtm	nihtbx_cryst_uncorrected	C_2y~A_bl	-0.00411034	0.00108915	-3.7739	0.000160714	-0.00411034	-0.061642
latent_factor_ss_perinatal	dmdtifp1_pc1	smri_area_cdk_trvtm	nihtbx_cryst_uncorrected	C_2y~B_bl	0.00329421	0.00173198	1.90199	0.0571729	0.00329421	0.0310666
latent_factor_ss_perinatal	dmdtifp1_pc1	smri_area_cdk_trvtm	nihtbx_cryst_uncorrected	D_2y~A_bl	0.396624	0.123316	3.21633	0.00129843	0.396624	0.0526722
latent_factor_ss_perinatal	dmdtifp1_pc1	smri_area_cdk_trvtm	nihtbx_cryst_uncorrected	D_2y~B_bl	-0.285759	0.195821	-1.45929	0.144487	-0.285759	-0.0238641
latent_factor_ss_perinatal	dmdtifp1_pc1	smri_area_cdk_trvtm	nihtbx_cryst_uncorrected	D_2y~C_2y	1.37838	1.84935	0.745335	0.456069	1.37838	0.012206
latent_factor_ss_perinatal	dmdtifp1_pc1	smri_area_cdk_trvtm	nihtbx_cryst_uncorrected	B_bl~~B_bl	0.327921	0.00758922	43.2088	0	0.327921	0.998904
latent_factor_ss_perinatal	dmdtifp1_pc1	smri_area_cdk_trvtm	nihtbx_cryst_uncorrected	C_2y~~C_2y	0.00367308	8.50078e-05	43.2088	0	0.00367308	0.995108
latent_factor_ss_perinatal	dmdtifp1_pc1	smri_area_cdk_trvtm	nihtbx_cryst_uncorrected	D_2y~~D_2y	46.9074	1.0856	43.2088	0	46.9074	0.996524
latent_factor_ss_perinatal	dmdtifp1_pc1	smri_area_cdk_trvtm	nihtbx_cryst_uncorrected	A_bl~~A_bl	0.830153	0	NA	NA	0.830153	1
latent_factor_ss_perinatal	dmdtifp1_pc1	smri_area_cdk_insula	nihtbx_cryst_uncorrected	B_bl~A_bl	-0.0208144	0.0102853	-2.0237	0.0430013	-0.0208144	-0.0330994
latent_factor_ss_perinatal	dmdtifp1_pc1	smri_area_cdk_insula	nihtbx_cryst_uncorrected	C_2y~A_bl	0.000759689	0.000726349	1.0459	0.295607	0.000759689	0.0171108
latent_factor_ss_perinatal	dmdtifp1_pc1	smri_area_cdk_insula	nihtbx_cryst_uncorrected	C_2y~B_bl	0.00269066	0.00115505	2.32947	0.0198344	0.00269066	0.0381099
latent_factor_ss_perinatal	dmdtifp1_pc1	smri_area_cdk_insula	nihtbx_cryst_uncorrected	D_2y~A_bl	0.390344	0.123107	3.17076	0.0015204	0.390344	0.0518381
latent_factor_ss_perinatal	dmdtifp1_pc1	smri_area_cdk_insula	nihtbx_cryst_uncorrected	D_2y~B_bl	-0.283396	0.195881	-1.44678	0.147959	-0.283396	-0.0236668
latent_factor_ss_perinatal	dmdtifp1_pc1	smri_area_cdk_insula	nihtbx_cryst_uncorrected	D_2y~C_2y	0.809533	2.77324	0.291909	0.770356	0.809533	0.00477311
latent_factor_ss_perinatal	dmdtifp1_pc1	smri_area_cdk_insula	nihtbx_cryst_uncorrected	B_bl~~B_bl	0.327921	0.00758922	43.2088	0	0.327921	0.998904
latent_factor_ss_perinatal	dmdtifp1_pc1	smri_area_cdk_insula	nihtbx_cryst_uncorrected	C_2y~~C_2y	0.00163361	3.78072e-05	43.2088	0	0.00163361	0.998298
latent_factor_ss_perinatal	dmdtifp1_pc1	smri_area_cdk_insula	nihtbx_cryst_uncorrected	D_2y~~D_2y	46.9133	1.08573	43.2088	0	46.9133	0.996649
latent_factor_ss_perinatal	dmdtifp1_pc1	smri_area_cdk_insula	nihtbx_cryst_uncorrected	A_bl~~A_bl	0.830153	0	NA	NA	0.830153	1
latent_factor_ss_perinatal	dmdtifp1_pc1	smri_thick_cdk_bankssts	nihtbx_cryst_uncorrected	B_bl~A_bl	-0.0208144	0.0102853	-2.0237	0.0430012	-0.0208144	-0.0330994
latent_factor_ss_perinatal	dmdtifp1_pc1	smri_thick_cdk_bankssts	nihtbx_cryst_uncorrected	C_2y~A_bl	0.000377862	0.000500108	0.75556	0.449913	0.000377862	0.0123691
latent_factor_ss_perinatal	dmdtifp1_pc1	smri_thick_cdk_bankssts	nihtbx_cryst_uncorrected	C_2y~B_bl	-0.000715545	0.000795281	-0.899739	0.368259	-0.000715545	-0.0147294
latent_factor_ss_perinatal	dmdtifp1_pc1	smri_thick_cdk_bankssts	nihtbx_cryst_uncorrected	D_2y~A_bl	0.390677	0.123099	3.17367	0.00150525	0.390677	0.0518824
latent_factor_ss_perinatal	dmdtifp1_pc1	smri_thick_cdk_bankssts	nihtbx_cryst_uncorrected	D_2y~B_bl	-0.280685	0.195761	-1.43382	0.151625	-0.280685	-0.0234404
latent_factor_ss_perinatal	dmdtifp1_pc1	smri_thick_cdk_bankssts	nihtbx_cryst_uncorrected	D_2y~C_2y	0.745272	4.02783	0.185031	0.853205	0.745272	0.00302352
latent_factor_ss_perinatal	dmdtifp1_pc1	smri_thick_cdk_bankssts	nihtbx_cryst_uncorrected	B_bl~~B_bl	0.327921	0.00758922	43.2088	0	0.327921	0.998904
latent_factor_ss_perinatal	dmdtifp1_pc1	smri_thick_cdk_bankssts	nihtbx_cryst_uncorrected	C_2y~~C_2y	0.000774434	1.79231e-05	43.2088	0	0.000774434	0.999618
latent_factor_ss_perinatal	dmdtifp1_pc1	smri_thick_cdk_bankssts	nihtbx_cryst_uncorrected	D_2y~~D_2y	46.9139	1.08575	43.2088	0	46.9139	0.996663
latent_factor_ss_perinatal	dmdtifp1_pc1	smri_thick_cdk_bankssts	nihtbx_cryst_uncorrected	A_bl~~A_bl	0.830153	0	NA	NA	0.830153	1
latent_factor_ss_perinatal	dmdtifp1_pc1	smri_thick_cdk_cdacate	nihtbx_cryst_uncorrected	B_bl~A_bl	-0.0208144	0.0102853	-2.0237	0.0430013	-0.0208144	-0.0330994
latent_factor_ss_perinatal	dmdtifp1_pc1	smri_thick_cdk_cdacate	nihtbx_cryst_uncorrected	C_2y~A_bl	-0.00127468	0.000562899	-2.26449	0.0235437	-0.00127468	-0.0368382
latent_factor_ss_perinatal	dmdtifp1_pc1	smri_thick_cdk_cdacate	nihtbx_cryst_uncorrected	C_2y~B_bl	0.00585039	0.000895131	6.5358	6.32723e-11	0.00585039	0.106323
latent_factor_ss_perinatal	dmdtifp1_pc1	smri_thick_cdk_cdacate	nihtbx_cryst_uncorrected	D_2y~A_bl	0.388005	0.123168	3.15021	0.00163154	0.388005	0.0515276
latent_factor_ss_perinatal	dmdtifp1_pc1	smri_thick_cdk_cdacate	nihtbx_cryst_uncorrected	D_2y~B_bl	-0.267662	0.196846	-1.35975	0.173908	-0.267662	-0.0223529
latent_factor_ss_perinatal	dmdtifp1_pc1	smri_thick_cdk_cdacate	nihtbx_cryst_uncorrected	D_2y~C_2y	-2.31701	3.57835	-0.647509	0.517302	-2.31701	-0.0106472
latent_factor_ss_perinatal	dmdtifp1_pc1	smri_thick_cdk_cdacate	nihtbx_cryst_uncorrected	B_bl~~B_bl	0.327921	0.00758922	43.2088	0	0.327921	0.998904
latent_factor_ss_perinatal	dmdtifp1_pc1	smri_thick_cdk_cdacate	nihtbx_cryst_uncorrected	C_2y~~C_2y	0.000981108	2.27062e-05	43.2088	0	0.000981108	0.987079
latent_factor_ss_perinatal	dmdtifp1_pc1	smri_thick_cdk_cdacate	nihtbx_cryst_uncorrected	D_2y~~D_2y	46.9091	1.08564	43.2088	0	46.9091	0.99656
latent_factor_ss_perinatal	dmdtifp1_pc1	smri_thick_cdk_cdacate	nihtbx_cryst_uncorrected	A_bl~~A_bl	0.830153	0	NA	NA	0.830153	1
latent_factor_ss_perinatal	dmdtifp1_pc1	smri_thick_cdk_cdmdfr	nihtbx_cryst_uncorrected	B_bl~A_bl	-0.0208144	0.0102853	-2.0237	0.0430013	-0.0208144	-0.0330994
latent_factor_ss_perinatal	dmdtifp1_pc1	smri_thick_cdk_cdmdfr	nihtbx_cryst_uncorrected	C_2y~A_bl	-0.000261013	0.000309134	-0.844336	0.398482	-0.000261013	-0.0138224
latent_factor_ss_perinatal	dmdtifp1_pc1	smri_thick_cdk_cdmdfr	nihtbx_cryst_uncorrected	C_2y~B_bl	0.000406195	0.00049159	0.826289	0.40864	0.000406195	0.0135269
latent_factor_ss_perinatal	dmdtifp1_pc1	smri_thick_cdk_cdmdfr	nihtbx_cryst_uncorrected	D_2y~A_bl	0.391675	0.123099	3.18178	0.00146373	0.391675	0.052015
latent_factor_ss_perinatal	dmdtifp1_pc1	smri_thick_cdk_cdmdfr	nihtbx_cryst_uncorrected	D_2y~B_bl	-0.282333	0.195754	-1.44228	0.149222	-0.282333	-0.023578
latent_factor_ss_perinatal	dmdtifp1_pc1	smri_thick_cdk_cdmdfr	nihtbx_cryst_uncorrected	D_2y~C_2y	2.7452	6.51599	0.421302	0.673534	2.7452	0.00688425
latent_factor_ss_perinatal	dmdtifp1_pc1	smri_thick_cdk_cdmdfr	nihtbx_cryst_uncorrected	B_bl~~B_bl	0.327921	0.00758922	43.2088	0	0.327921	0.998904
latent_factor_ss_perinatal	dmdtifp1_pc1	smri_thick_cdk_cdmdfr	nihtbx_cryst_uncorrected	C_2y~~C_2y	0.000295903	6.84822e-06	43.2088	0	0.000295903	0.999614
latent_factor_ss_perinatal	dmdtifp1_pc1	smri_thick_cdk_cdmdfr	nihtbx_cryst_uncorrected	D_2y~~D_2y	46.9121	1.08571	43.2088	0	46.9121	0.996625
latent_factor_ss_perinatal	dmdtifp1_pc1	smri_thick_cdk_cdmdfr	nihtbx_cryst_uncorrected	A_bl~~A_bl	0.830153	0	NA	NA	0.830153	1
latent_factor_ss_perinatal	dmdtifp1_pc1	smri_thick_cdk_cuneus	nihtbx_cryst_uncorrected	B_bl~A_bl	-0.0208144	0.0102853	-2.0237	0.0430013	-0.0208144	-0.0330994
latent_factor_ss_perinatal	dmdtifp1_pc1	smri_thick_cdk_cuneus	nihtbx_cryst_uncorrected	C_2y~A_bl	0.00114549	0.000441418	2.59502	0.0094585	0.00114549	0.0424052
latent_factor_ss_perinatal	dmdtifp1_pc1	smri_thick_cdk_cuneus	nihtbx_cryst_uncorrected	C_2y~B_bl	-0.00196065	0.000701951	-2.79314	0.00521989	-0.00196065	-0.0456427
latent_factor_ss_perinatal	dmdtifp1_pc1	smri_thick_cdk_cuneus	nihtbx_cryst_uncorrected	D_2y~A_bl	0.382757	0.123161	3.10778	0.001885	0.382757	0.0508306
latent_factor_ss_perinatal	dmdtifp1_pc1	smri_thick_cdk_cuneus	nihtbx_cryst_uncorrected	D_2y~B_bl	-0.267179	0.19588	-1.36399	0.172571	-0.267179	-0.0223125
latent_factor_ss_perinatal	dmdtifp1_pc1	smri_thick_cdk_cuneus	nihtbx_cryst_uncorrected	D_2y~C_2y	7.1603	4.56188	1.56959	0.11651	7.1603	0.0256865
latent_factor_ss_perinatal	dmdtifp1_pc1	smri_thick_cdk_cuneus	nihtbx_cryst_uncorrected	B_bl~~B_bl	0.327921	0.00758922	43.2088	0	0.327921	0.998904
latent_factor_ss_perinatal	dmdtifp1_pc1	smri_thick_cdk_cuneus	nihtbx_cryst_uncorrected	C_2y~~C_2y	0.000603332	1.39632e-05	43.2088	0	0.000603332	0.99599
latent_factor_ss_perinatal	dmdtifp1_pc1	smri_thick_cdk_cuneus	nihtbx_cryst_uncorrected	D_2y~~D_2y	46.8834	1.08504	43.2088	0	46.8834	0.996015
latent_factor_ss_perinatal	dmdtifp1_pc1	smri_thick_cdk_cuneus	nihtbx_cryst_uncorrected	A_bl~~A_bl	0.830153	0	NA	NA	0.830153	1
latent_factor_ss_perinatal	dmdtifp1_pc1	smri_thick_cdk_ehinal	nihtbx_cryst_uncorrected	B_bl~A_bl	-0.0208144	0.0102853	-2.0237	0.0430013	-0.0208144	-0.0330994
latent_factor_ss_perinatal	dmdtifp1_pc1	smri_thick_cdk_ehinal	nihtbx_cryst_uncorrected	C_2y~A_bl	0.00112268	0.000703801	1.59516	0.110676	0.00112268	0.026092
latent_factor_ss_perinatal	dmdtifp1_pc1	smri_thick_cdk_ehinal	nihtbx_cryst_uncorrected	C_2y~B_bl	-0.00248858	0.0011192	-2.22354	0.0261795	-0.00248858	-0.0363703
latent_factor_ss_perinatal	dmdtifp1_pc1	smri_thick_cdk_ehinal	nihtbx_cryst_uncorrected	D_2y~A_bl	0.384097	0.123057	3.12129	0.00180063	0.384097	0.0510086
latent_factor_ss_perinatal	dmdtifp1_pc1	smri_thick_cdk_ehinal	nihtbx_cryst_uncorrected	D_2y~B_bl	-0.266008	0.195751	-1.35891	0.174175	-0.266008	-0.0222147
latent_factor_ss_perinatal	dmdtifp1_pc1	smri_thick_cdk_ehinal	nihtbx_cryst_uncorrected	D_2y~C_2y	6.11197	2.86037	2.13678	0.0326161	6.11197	0.0349246
latent_factor_ss_perinatal	dmdtifp1_pc1	smri_thick_cdk_ehinal	nihtbx_cryst_uncorrected	B_bl~~B_bl	0.327921	0.00758922	43.2088	0	0.327921	0.998904
latent_factor_ss_perinatal	dmdtifp1_pc1	smri_thick_cdk_ehinal	nihtbx_cryst_uncorrected	C_2y~~C_2y	0.00153375	3.54964e-05	43.2088	0	0.00153375	0.997934
latent_factor_ss_perinatal	dmdtifp1_pc1	smri_thick_cdk_ehinal	nihtbx_cryst_uncorrected	D_2y~~D_2y	46.8571	1.08443	43.2088	0	46.8571	0.995455
latent_factor_ss_perinatal	dmdtifp1_pc1	smri_thick_cdk_ehinal	nihtbx_cryst_uncorrected	A_bl~~A_bl	0.830153	0	NA	NA	0.830153	1
latent_factor_ss_perinatal	dmdtifp1_pc1	smri_thick_cdk_fusiform	nihtbx_cryst_uncorrected	B_bl~A_bl	-0.0208144	0.0102853	-2.0237	0.0430013	-0.0208144	-0.0330994
latent_factor_ss_perinatal	dmdtifp1_pc1	smri_thick_cdk_fusiform	nihtbx_cryst_uncorrected	C_2y~A_bl	0.000463511	0.000228242	2.03078	0.0422772	0.000463511	0.0328108
latent_factor_ss_perinatal	dmdtifp1_pc1	smri_thick_cdk_fusiform	nihtbx_cryst_uncorrected	C_2y~B_bl	-0.00354639	0.000362955	-9.77088	0	-0.00354639	-0.157866
latent_factor_ss_perinatal	dmdtifp1_pc1	smri_thick_cdk_fusiform	nihtbx_cryst_uncorrected	D_2y~A_bl	0.388073	0.12315	3.15121	0.00162594	0.388073	0.0515366
latent_factor_ss_perinatal	dmdtifp1_pc1	smri_thick_cdk_fusiform	nihtbx_cryst_uncorrected	D_2y~B_bl	-0.259139	0.198214	-1.30737	0.191087	-0.259139	-0.0216411
latent_factor_ss_perinatal	dmdtifp1_pc1	smri_thick_cdk_fusiform	nihtbx_cryst_uncorrected	D_2y~C_2y	6.22583	8.82495	0.70548	0.480511	6.22583	0.01168
latent_factor_ss_perinatal	dmdtifp1_pc1	smri_thick_cdk_fusiform	nihtbx_cryst_uncorrected	B_bl~~B_bl	0.327921	0.00758922	43.2088	0	0.327921	0.998904
latent_factor_ss_perinatal	dmdtifp1_pc1	smri_thick_cdk_fusiform	nihtbx_cryst_uncorrected	C_2y~~C_2y	0.000161306	3.73316e-06	43.2088	0	0.000161306	0.973659
latent_factor_ss_perinatal	dmdtifp1_pc1	smri_thick_cdk_fusiform	nihtbx_cryst_uncorrected	D_2y~~D_2y	46.9081	1.08561	43.2088	0	46.9081	0.996539
latent_factor_ss_perinatal	dmdtifp1_pc1	smri_thick_cdk_fusiform	nihtbx_cryst_uncorrected	A_bl~~A_bl	0.830153	0	NA	NA	0.830153	1
latent_factor_ss_perinatal	dmdtifp1_pc1	smri_thick_cdk_ifpl	nihtbx_cryst_uncorrected	B_bl~A_bl	-0.0208144	0.0102853	-2.0237	0.0430013	-0.0208144	-0.0330994
latent_factor_ss_perinatal	dmdtifp1_pc1	smri_thick_cdk_ifpl	nihtbx_cryst_uncorrected	C_2y~A_bl	0.000449395	0.000231859	1.93822	0.052596	0.000449395	0.0317135
latent_factor_ss_perinatal	dmdtifp1_pc1	smri_thick_cdk_ifpl	nihtbx_cryst_uncorrected	C_2y~B_bl	-0.00044188	0.000368706	-1.19846	0.230737	-0.00044188	-0.0196094
latent_factor_ss_perinatal	dmdtifp1_pc1	smri_thick_cdk_ifpl	nihtbx_cryst_uncorrected	D_2y~A_bl	0.390722	0.123152	3.17267	0.00151043	0.390722	0.0518884
latent_factor_ss_perinatal	dmdtifp1_pc1	smri_thick_cdk_ifpl	nihtbx_cryst_uncorrected	D_2y~B_bl	-0.280985	0.195778	-1.43522	0.151224	-0.280985	-0.0234655
latent_factor_ss_perinatal	dmdtifp1_pc1	smri_thick_cdk_ifpl	nihtbx_cryst_uncorrected	D_2y~C_2y	0.526431	8.68787	0.0605937	0.951683	0.526431	0.000990667
latent_factor_ss_perinatal	dmdtifp1_pc1	smri_thick_cdk_ifpl	nihtbx_cryst_uncorrected	B_bl~~B_bl	0.327921	0.00758922	43.2088	0	0.327921	0.998904
latent_factor_ss_perinatal	dmdtifp1_pc1	smri_thick_cdk_ifpl	nihtbx_cryst_uncorrected	C_2y~~C_2y	0.000166458	3.85241e-06	43.2088	0	0.000166458	0.998569
latent_factor_ss_perinatal	dmdtifp1_pc1	smri_thick_cdk_ifpl	nihtbx_cryst_uncorrected	D_2y~~D_2y	46.9143	1.08576	43.2088	0	46.9143	0.996671
latent_factor_ss_perinatal	dmdtifp1_pc1	smri_thick_cdk_ifpl	nihtbx_cryst_uncorrected	A_bl~~A_bl	0.830153	0	NA	NA	0.830153	1
latent_factor_ss_perinatal	dmdtifp1_pc1	smri_thick_cdk_iftm	nihtbx_cryst_uncorrected	B_bl~A_bl	-0.0208144	0.0102853	-2.0237	0.0430013	-0.0208144	-0.0330994
latent_factor_ss_perinatal	dmdtifp1_pc1	smri_thick_cdk_iftm	nihtbx_cryst_uncorrected	C_2y~A_bl	0.000512698	0.000289447	1.7713	0.0765108	0.000512698	0.0288406
latent_factor_ss_perinatal	dmdtifp1_pc1	smri_thick_cdk_iftm	nihtbx_cryst_uncorrected	C_2y~B_bl	-0.00284739	0.000460284	-6.18617	6.16442e-10	-0.00284739	-0.100724
latent_factor_ss_perinatal	dmdtifp1_pc1	smri_thick_cdk_iftm	nihtbx_cryst_uncorrected	D_2y~A_bl	0.385895	0.123109	3.13458	0.00172101	0.385895	0.0512473
latent_factor_ss_perinatal	dmdtifp1_pc1	smri_thick_cdk_iftm	nihtbx_cryst_uncorrected	D_2y~B_bl	-0.253095	0.196688	-1.28679	0.198169	-0.253095	-0.0211364
latent_factor_ss_perinatal	dmdtifp1_pc1	smri_thick_cdk_iftm	nihtbx_cryst_uncorrected	D_2y~C_2y	9.87649	6.95746	1.41955	0.155738	9.87649	0.0233165
latent_factor_ss_perinatal	dmdtifp1_pc1	smri_thick_cdk_iftm	nihtbx_cryst_uncorrected	B_bl~~B_bl	0.327921	0.00758922	43.2088	0	0.327921	0.998904
latent_factor_ss_perinatal	dmdtifp1_pc1	smri_thick_cdk_iftm	nihtbx_cryst_uncorrected	C_2y~~C_2y	0.000259415	6.00376e-06	43.2088	0	0.000259415	0.988831
latent_factor_ss_perinatal	dmdtifp1_pc1	smri_thick_cdk_iftm	nihtbx_cryst_uncorrected	D_2y~~D_2y	46.889	1.08517	43.2088	0	46.889	0.996134
latent_factor_ss_perinatal	dmdtifp1_pc1	smri_thick_cdk_iftm	nihtbx_cryst_uncorrected	A_bl~~A_bl	0.830153	0	NA	NA	0.830153	1
latent_factor_ss_perinatal	dmdtifp1_pc1	smri_thick_cdk_ihcate	nihtbx_cryst_uncorrected	B_bl~A_bl	-0.0208144	0.0102853	-2.0237	0.0430013	-0.0208144	-0.0330994
latent_factor_ss_perinatal	dmdtifp1_pc1	smri_thick_cdk_ihcate	nihtbx_cryst_uncorrected	C_2y~A_bl	-0.00156675	0.00044305	-3.53628	0.000405804	-0.00156675	-0.0576736
latent_factor_ss_perinatal	dmdtifp1_pc1	smri_thick_cdk_ihcate	nihtbx_cryst_uncorrected	C_2y~B_bl	0.00283748	0.000704545	4.02739	5.64004e-05	0.00283748	0.0656831
latent_factor_ss_perinatal	dmdtifp1_pc1	smri_thick_cdk_ihcate	nihtbx_cryst_uncorrected	D_2y~A_bl	0.378812	0.123248	3.07356	0.00211519	0.378812	0.0503067
latent_factor_ss_perinatal	dmdtifp1_pc1	smri_thick_cdk_ihcate	nihtbx_cryst_uncorrected	D_2y~B_bl	-0.259219	0.196089	-1.32195	0.186186	-0.259219	-0.0216478
latent_factor_ss_perinatal	dmdtifp1_pc1	smri_thick_cdk_ihcate	nihtbx_cryst_uncorrected	D_2y~C_2y	-7.7528	4.54481	-1.70586	0.0880345	-7.7528	-0.0279694
latent_factor_ss_perinatal	dmdtifp1_pc1	smri_thick_cdk_ihcate	nihtbx_cryst_uncorrected	B_bl~~B_bl	0.327921	0.00758922	43.2088	0	0.327921	0.998904
latent_factor_ss_perinatal	dmdtifp1_pc1	smri_thick_cdk_ihcate	nihtbx_cryst_uncorrected	C_2y~~C_2y	0.000607801	1.40666e-05	43.2088	0	0.000607801	0.992109
latent_factor_ss_perinatal	dmdtifp1_pc1	smri_thick_cdk_ihcate	nihtbx_cryst_uncorrected	D_2y~~D_2y	46.8778	1.08491	43.2088	0	46.8778	0.995896
latent_factor_ss_perinatal	dmdtifp1_pc1	smri_thick_cdk_ihcate	nihtbx_cryst_uncorrected	A_bl~~A_bl	0.830153	0	NA	NA	0.830153	1
latent_factor_ss_perinatal	dmdtifp1_pc1	smri_thick_cdk_locc	nihtbx_cryst_uncorrected	B_bl~A_bl	-0.0208144	0.0102853	-2.0237	0.0430013	-0.0208144	-0.0330994
latent_factor_ss_perinatal	dmdtifp1_pc1	smri_thick_cdk_locc	nihtbx_cryst_uncorrected	C_2y~A_bl	-0.000104658	0.000265454	-0.394261	0.693389	-0.000104658	-0.00645304
latent_factor_ss_perinatal	dmdtifp1_pc1	smri_thick_cdk_locc	nihtbx_cryst_uncorrected	C_2y~B_bl	0.000696345	0.00042213	1.6496	0.099025	0.000696345	0.0269997
latent_factor_ss_perinatal	dmdtifp1_pc1	smri_thick_cdk_locc	nihtbx_cryst_uncorrected	D_2y~A_bl	0.391307	0.12309	3.17904	0.00147766	0.391307	0.0519661
latent_factor_ss_perinatal	dmdtifp1_pc1	smri_thick_cdk_locc	nihtbx_cryst_uncorrected	D_2y~B_bl	-0.283537	0.195807	-1.44805	0.147604	-0.283537	-0.0236786
latent_factor_ss_perinatal	dmdtifp1_pc1	smri_thick_cdk_locc	nihtbx_cryst_uncorrected	D_2y~C_2y	3.33109	7.58816	0.438985	0.660673	3.33109	0.00717459
latent_factor_ss_perinatal	dmdtifp1_pc1	smri_thick_cdk_locc	nihtbx_cryst_uncorrected	B_bl~~B_bl	0.327921	0.00758922	43.2088	0	0.327921	0.998904
latent_factor_ss_perinatal	dmdtifp1_pc1	smri_thick_cdk_locc	nihtbx_cryst_uncorrected	C_2y~~C_2y	0.00021819	5.04968e-06	43.2088	0	0.00021819	0.999218
latent_factor_ss_perinatal	dmdtifp1_pc1	smri_thick_cdk_locc	nihtbx_cryst_uncorrected	D_2y~~D_2y	46.9119	1.0857	43.2088	0	46.9119	0.996621
latent_factor_ss_perinatal	dmdtifp1_pc1	smri_thick_cdk_locc	nihtbx_cryst_uncorrected	A_bl~~A_bl	0.830153	0	NA	NA	0.830153	1
latent_factor_ss_perinatal	dmdtifp1_pc1	smri_thick_cdk_lobfr	nihtbx_cryst_uncorrected	B_bl~A_bl	-0.0208144	0.0102853	-2.0237	0.0430013	-0.0208144	-0.0330994
latent_factor_ss_perinatal	dmdtifp1_pc1	smri_thick_cdk_lobfr	nihtbx_cryst_uncorrected	C_2y~A_bl	5.31274e-05	0.000289181	0.183717	0.854236	5.31274e-05	0.0029974
latent_factor_ss_perinatal	dmdtifp1_pc1	smri_thick_cdk_lobfr	nihtbx_cryst_uncorrected	C_2y~B_bl	0.00238197	0.000459861	5.17976	2.22177e-07	0.00238197	0.0845095
latent_factor_ss_perinatal	dmdtifp1_pc1	smri_thick_cdk_lobfr	nihtbx_cryst_uncorrected	D_2y~A_bl	0.391631	0.123037	3.18305	0.00145734	0.391631	0.0520091
latent_factor_ss_perinatal	dmdtifp1_pc1	smri_thick_cdk_lobfr	nihtbx_cryst_uncorrected	D_2y~B_bl	-0.251056	0.196356	-1.27858	0.201046	-0.251056	-0.020966
latent_factor_ss_perinatal	dmdtifp1_pc1	smri_thick_cdk_lobfr	nihtbx_cryst_uncorrected	D_2y~C_2y	-12.6626	6.96267	-1.81865	0.0689654	-12.6626	-0.0298057
latent_factor_ss_perinatal	dmdtifp1_pc1	smri_thick_cdk_lobfr	nihtbx_cryst_uncorrected	B_bl~~B_bl	0.327921	0.00758922	43.2088	0	0.327921	0.998904
latent_factor_ss_perinatal	dmdtifp1_pc1	smri_thick_cdk_lobfr	nihtbx_cryst_uncorrected	C_2y~~C_2y	0.000258938	5.99272e-06	43.2088	0	0.000258938	0.992866
latent_factor_ss_perinatal	dmdtifp1_pc1	smri_thick_cdk_lobfr	nihtbx_cryst_uncorrected	D_2y~~D_2y	46.8728	1.0848	43.2088	0	46.8728	0.99579
latent_factor_ss_perinatal	dmdtifp1_pc1	smri_thick_cdk_lobfr	nihtbx_cryst_uncorrected	A_bl~~A_bl	0.830153	0	NA	NA	0.830153	1
latent_factor_ss_perinatal	dmdtifp1_pc1	smri_thick_cdk_lingual	nihtbx_cryst_uncorrected	B_bl~A_bl	-0.0208144	0.0102853	-2.0237	0.0430013	-0.0208144	-0.0330994
latent_factor_ss_perinatal	dmdtifp1_pc1	smri_thick_cdk_lingual	nihtbx_cryst_uncorrected	C_2y~A_bl	0.000227092	0.000333001	0.681957	0.495266	0.000227092	0.0111437
latent_factor_ss_perinatal	dmdtifp1_pc1	smri_thick_cdk_lingual	nihtbx_cryst_uncorrected	C_2y~B_bl	-0.00201387	0.000529544	-3.80302	0.000142943	-0.00201387	-0.0621444
latent_factor_ss_perinatal	dmdtifp1_pc1	smri_thick_cdk_lingual	nihtbx_cryst_uncorrected	D_2y~A_bl	0.39028	0.123094	3.17058	0.00152137	0.39028	0.0518296
latent_factor_ss_perinatal	dmdtifp1_pc1	smri_thick_cdk_lingual	nihtbx_cryst_uncorrected	D_2y~B_bl	-0.275195	0.196113	-1.40325	0.160543	-0.275195	-0.0229819
latent_factor_ss_perinatal	dmdtifp1_pc1	smri_thick_cdk_lingual	nihtbx_cryst_uncorrected	D_2y~C_2y	2.99064	6.04892	0.494408	0.621018	2.99064	0.00809353
latent_factor_ss_perinatal	dmdtifp1_pc1	smri_thick_cdk_lingual	nihtbx_cryst_uncorrected	B_bl~~B_bl	0.327921	0.00758922	43.2088	0	0.327921	0.998904
latent_factor_ss_perinatal	dmdtifp1_pc1	smri_thick_cdk_lingual	nihtbx_cryst_uncorrected	C_2y~~C_2y	0.000343358	7.94649e-06	43.2088	0	0.000343358	0.995968
latent_factor_ss_perinatal	dmdtifp1_pc1	smri_thick_cdk_lingual	nihtbx_cryst_uncorrected	D_2y~~D_2y	46.9113	1.08569	43.2088	0	46.9113	0.996607
latent_factor_ss_perinatal	dmdtifp1_pc1	smri_thick_cdk_lingual	nihtbx_cryst_uncorrected	A_bl~~A_bl	0.830153	0	NA	NA	0.830153	1
latent_factor_ss_perinatal	dmdtifp1_pc1	smri_thick_cdk_mobfr	nihtbx_cryst_uncorrected	B_bl~A_bl	-0.0208144	0.0102853	-2.0237	0.0430013	-0.0208144	-0.0330994
latent_factor_ss_perinatal	dmdtifp1_pc1	smri_thick_cdk_mobfr	nihtbx_cryst_uncorrected	C_2y~A_bl	0.0005022	0.0004021	1.24894	0.211686	0.0005022	0.0204449
latent_factor_ss_perinatal	dmdtifp1_pc1	smri_thick_cdk_mobfr	nihtbx_cryst_uncorrected	C_2y~B_bl	-0.000316025	0.000639426	-0.494232	0.621142	-0.000316025	-0.00809048
latent_factor_ss_perinatal	dmdtifp1_pc1	smri_thick_cdk_mobfr	nihtbx_cryst_uncorrected	D_2y~A_bl	0.389446	0.12311	3.16339	0.00155944	0.389446	0.0517189
latent_factor_ss_perinatal	dmdtifp1_pc1	smri_thick_cdk_mobfr	nihtbx_cryst_uncorrected	D_2y~B_bl	-0.280266	0.195738	-1.43184	0.152188	-0.280266	-0.0234054
latent_factor_ss_perinatal	dmdtifp1_pc1	smri_thick_cdk_mobfr	nihtbx_cryst_uncorrected	D_2y~C_2y	3.01292	5.00936	0.601458	0.547535	3.01292	0.00982834
latent_factor_ss_perinatal	dmdtifp1_pc1	smri_thick_cdk_mobfr	nihtbx_cryst_uncorrected	B_bl~~B_bl	0.327921	0.00758922	43.2088	0	0.327921	0.998904
latent_factor_ss_perinatal	dmdtifp1_pc1	smri_thick_cdk_mobfr	nihtbx_cryst_uncorrected	C_2y~~C_2y	0.000500639	1.15865e-05	43.2088	0	0.000500639	0.999506
latent_factor_ss_perinatal	dmdtifp1_pc1	smri_thick_cdk_mobfr	nihtbx_cryst_uncorrected	D_2y~~D_2y	46.9098	1.08565	43.2088	0	46.9098	0.996576
latent_factor_ss_perinatal	dmdtifp1_pc1	smri_thick_cdk_mobfr	nihtbx_cryst_uncorrected	A_bl~~A_bl	0.830153	0	NA	NA	0.830153	1
latent_factor_ss_perinatal	dmdtifp1_pc1	smri_thick_cdk_mdtm	nihtbx_cryst_uncorrected	B_bl~A_bl	-0.0208144	0.0102853	-2.0237	0.0430013	-0.0208144	-0.0330994
latent_factor_ss_perinatal	dmdtifp1_pc1	smri_thick_cdk_mdtm	nihtbx_cryst_uncorrected	C_2y~A_bl	0.000495894	0.000292687	1.69428	0.0902121	0.000495894	0.0277301
latent_factor_ss_perinatal	dmdtifp1_pc1	smri_thick_cdk_mdtm	nihtbx_cryst_uncorrected	C_2y~B_bl	-0.000233772	0.000465436	-0.502265	0.615481	-0.000233772	-0.0082205
latent_factor_ss_perinatal	dmdtifp1_pc1	smri_thick_cdk_mdtm	nihtbx_cryst_uncorrected	D_2y~A_bl	0.389886	0.123136	3.1663	0.00154391	0.389886	0.0517774
latent_factor_ss_perinatal	dmdtifp1_pc1	smri_thick_cdk_mdtm	nihtbx_cryst_uncorrected	D_2y~B_bl	-0.280712	0.195745	-1.43407	0.151551	-0.280712	-0.0234427
latent_factor_ss_perinatal	dmdtifp1_pc1	smri_thick_cdk_mdtm	nihtbx_cryst_uncorrected	D_2y~C_2y	2.16235	6.88222	0.314194	0.753374	2.16235	0.00513531
latent_factor_ss_perinatal	dmdtifp1_pc1	smri_thick_cdk_mdtm	nihtbx_cryst_uncorrected	B_bl~~B_bl	0.327921	0.00758922	43.2088	0	0.327921	0.998904
latent_factor_ss_perinatal	dmdtifp1_pc1	smri_thick_cdk_mdtm	nihtbx_cryst_uncorrected	C_2y~~C_2y	0.000265255	6.13891e-06	43.2088	0	0.000265255	0.999148
latent_factor_ss_perinatal	dmdtifp1_pc1	smri_thick_cdk_mdtm	nihtbx_cryst_uncorrected	D_2y~~D_2y	46.9131	1.08573	43.2088	0	46.9131	0.996646
latent_factor_ss_perinatal	dmdtifp1_pc1	smri_thick_cdk_mdtm	nihtbx_cryst_uncorrected	A_bl~~A_bl	0.830153	0	NA	NA	0.830153	1
latent_factor_ss_perinatal	dmdtifp1_pc1	smri_thick_cdk_parahpal	nihtbx_cryst_uncorrected	B_bl~A_bl	-0.0208144	0.0102853	-2.0237	0.0430013	-0.0208144	-0.0330994
latent_factor_ss_perinatal	dmdtifp1_pc1	smri_thick_cdk_parahpal	nihtbx_cryst_uncorrected	C_2y~A_bl	-0.000943234	0.000517958	-1.82106	0.0685974	-0.000943234	-0.029714
latent_factor_ss_perinatal	dmdtifp1_pc1	smri_thick_cdk_parahpal	nihtbx_cryst_uncorrected	C_2y~B_bl	-0.00398228	0.000823666	-4.83483	1.33261e-06	-0.00398228	-0.0788891
latent_factor_ss_perinatal	dmdtifp1_pc1	smri_thick_cdk_parahpal	nihtbx_cryst_uncorrected	D_2y~A_bl	0.402374	0.122985	3.27172	0.00106894	0.402374	0.0534358
latent_factor_ss_perinatal	dmdtifp1_pc1	smri_thick_cdk_parahpal	nihtbx_cryst_uncorrected	D_2y~B_bl	-0.233021	0.196098	-1.18829	0.234718	-0.233021	-0.0194599
latent_factor_ss_perinatal	dmdtifp1_pc1	smri_thick_cdk_parahpal	nihtbx_cryst_uncorrected	D_2y~C_2y	12.1028	3.884	3.11606	0.00183285	12.1028	0.0510206
latent_factor_ss_perinatal	dmdtifp1_pc1	smri_thick_cdk_parahpal	nihtbx_cryst_uncorrected	B_bl~~B_bl	0.327921	0.00758922	43.2088	0	0.327921	0.998904
latent_factor_ss_perinatal	dmdtifp1_pc1	smri_thick_cdk_parahpal	nihtbx_cryst_uncorrected	C_2y~~C_2y	0.000830702	1.92253e-05	43.2088	0	0.000830702	0.993049
latent_factor_ss_perinatal	dmdtifp1_pc1	smri_thick_cdk_parahpal	nihtbx_cryst_uncorrected	D_2y~~D_2y	46.7927	1.08294	43.2088	0	46.7927	0.994087
latent_factor_ss_perinatal	dmdtifp1_pc1	smri_thick_cdk_parahpal	nihtbx_cryst_uncorrected	A_bl~~A_bl	0.830153	0	NA	NA	0.830153	1
latent_factor_ss_perinatal	dmdtifp1_pc1	smri_thick_cdk_paracn	nihtbx_cryst_uncorrected	B_bl~A_bl	-0.0208144	0.0102853	-2.0237	0.0430013	-0.0208144	-0.0330994
latent_factor_ss_perinatal	dmdtifp1_pc1	smri_thick_cdk_paracn	nihtbx_cryst_uncorrected	C_2y~A_bl	8.94372e-05	0.000330766	0.270394	0.786857	8.94372e-05	0.00441744
latent_factor_ss_perinatal	dmdtifp1_pc1	smri_thick_cdk_paracn	nihtbx_cryst_uncorrected	C_2y~B_bl	0.00215746	0.00052599	4.10172	4.10091e-05	0.00215746	0.06701
latent_factor_ss_perinatal	dmdtifp1_pc1	smri_thick_cdk_paracn	nihtbx_cryst_uncorrected	D_2y~A_bl	0.391275	0.123086	3.17887	0.00147851	0.391275	0.0519618
latent_factor_ss_perinatal	dmdtifp1_pc1	smri_thick_cdk_paracn	nihtbx_cryst_uncorrected	D_2y~B_bl	-0.273589	0.196172	-1.39464	0.163126	-0.273589	-0.0228478
latent_factor_ss_perinatal	dmdtifp1_pc1	smri_thick_cdk_paracn	nihtbx_cryst_uncorrected	D_2y~C_2y	-3.53608	6.08971	-0.580665	0.561466	-3.53608	-0.00950763
latent_factor_ss_perinatal	dmdtifp1_pc1	smri_thick_cdk_paracn	nihtbx_cryst_uncorrected	B_bl~~B_bl	0.327921	0.00758922	43.2088	0	0.327921	0.998904
latent_factor_ss_perinatal	dmdtifp1_pc1	smri_thick_cdk_paracn	nihtbx_cryst_uncorrected	C_2y~~C_2y	0.000338765	7.84019e-06	43.2088	0	0.000338765	0.99551
latent_factor_ss_perinatal	dmdtifp1_pc1	smri_thick_cdk_paracn	nihtbx_cryst_uncorrected	D_2y~~D_2y	46.9101	1.08566	43.2088	0	46.9101	0.996582
latent_factor_ss_perinatal	dmdtifp1_pc1	smri_thick_cdk_paracn	nihtbx_cryst_uncorrected	A_bl~~A_bl	0.830153	0	NA	NA	0.830153	1
latent_factor_ss_perinatal	dmdtifp1_pc1	smri_thick_cdk_parsopc	nihtbx_cryst_uncorrected	B_bl~A_bl	-0.0208144	0.0102853	-2.0237	0.0430013	-0.0208144	-0.0330994
latent_factor_ss_perinatal	dmdtifp1_pc1	smri_thick_cdk_parsopc	nihtbx_cryst_uncorrected	C_2y~A_bl	-0.000136017	0.000356355	-0.381689	0.702692	-0.000136017	-0.00624958
latent_factor_ss_perinatal	dmdtifp1_pc1	smri_thick_cdk_parsopc	nihtbx_cryst_uncorrected	C_2y~B_bl	9.42293e-05	0.000566681	0.166283	0.867934	9.42293e-05	0.00272263
latent_factor_ss_perinatal	dmdtifp1_pc1	smri_thick_cdk_parsopc	nihtbx_cryst_uncorrected	D_2y~A_bl	0.389889	0.123061	3.16826	0.00153355	0.389889	0.0517778
latent_factor_ss_perinatal	dmdtifp1_pc1	smri_thick_cdk_parsopc	nihtbx_cryst_uncorrected	D_2y~B_bl	-0.280477	0.195691	-1.43327	0.151782	-0.280477	-0.023423
latent_factor_ss_perinatal	dmdtifp1_pc1	smri_thick_cdk_parsopc	nihtbx_cryst_uncorrected	D_2y~C_2y	-7.86192	5.65123	-1.39119	0.164168	-7.86192	-0.0227234
latent_factor_ss_perinatal	dmdtifp1_pc1	smri_thick_cdk_parsopc	nihtbx_cryst_uncorrected	B_bl~~B_bl	0.327921	0.00758922	43.2088	0	0.327921	0.998904
latent_factor_ss_perinatal	dmdtifp1_pc1	smri_thick_cdk_parsopc	nihtbx_cryst_uncorrected	C_2y~~C_2y	0.000393207	9.10015e-06	43.2088	0	0.000393207	0.999952
latent_factor_ss_perinatal	dmdtifp1_pc1	smri_thick_cdk_parsopc	nihtbx_cryst_uncorrected	D_2y~~D_2y	46.89	1.0852	43.2088	0	46.89	0.996156
latent_factor_ss_perinatal	dmdtifp1_pc1	smri_thick_cdk_parsopc	nihtbx_cryst_uncorrected	A_bl~~A_bl	0.830153	0	NA	NA	0.830153	1
latent_factor_ss_perinatal	dmdtifp1_pc1	smri_thick_cdk_parsobis	nihtbx_cryst_uncorrected	B_bl~A_bl	-0.0208144	0.0102853	-2.0237	0.0430013	-0.0208144	-0.0330994
latent_factor_ss_perinatal	dmdtifp1_pc1	smri_thick_cdk_parsobis	nihtbx_cryst_uncorrected	C_2y~A_bl	0.000180492	0.000499325	0.361472	0.717747	0.000180492	0.00591857
latent_factor_ss_perinatal	dmdtifp1_pc1	smri_thick_cdk_parsobis	nihtbx_cryst_uncorrected	C_2y~B_bl	-9.57895e-05	0.000794035	-0.120636	0.903979	-9.57895e-05	-0.00197524
latent_factor_ss_perinatal	dmdtifp1_pc1	smri_thick_cdk_parsobis	nihtbx_cryst_uncorrected	D_2y~A_bl	0.391681	0.123077	3.18242	0.00146052	0.391681	0.0520157
latent_factor_ss_perinatal	dmdtifp1_pc1	smri_thick_cdk_parsobis	nihtbx_cryst_uncorrected	D_2y~B_bl	-0.281601	0.195715	-1.43883	0.150199	-0.281601	-0.0235169
latent_factor_ss_perinatal	dmdtifp1_pc1	smri_thick_cdk_parsobis	nihtbx_cryst_uncorrected	D_2y~C_2y	-3.9998	4.03364	-0.99161	0.321388	-3.9998	-0.0161987
latent_factor_ss_perinatal	dmdtifp1_pc1	smri_thick_cdk_parsobis	nihtbx_cryst_uncorrected	B_bl~~B_bl	0.327921	0.00758922	43.2088	0	0.327921	0.998904
latent_factor_ss_perinatal	dmdtifp1_pc1	smri_thick_cdk_parsobis	nihtbx_cryst_uncorrected	C_2y~~C_2y	0.000772009	1.78669e-05	43.2088	0	0.000772009	0.99996
latent_factor_ss_perinatal	dmdtifp1_pc1	smri_thick_cdk_parsobis	nihtbx_cryst_uncorrected	D_2y~~D_2y	46.902	1.08547	43.2088	0	46.902	0.99641
latent_factor_ss_perinatal	dmdtifp1_pc1	smri_thick_cdk_parsobis	nihtbx_cryst_uncorrected	A_bl~~A_bl	0.830153	0	NA	NA	0.830153	1
latent_factor_ss_perinatal	dmdtifp1_pc1	smri_thick_cdk_parstgris	nihtbx_cryst_uncorrected	B_bl~A_bl	-0.0208144	0.0102853	-2.0237	0.0430013	-0.0208144	-0.0330994
latent_factor_ss_perinatal	dmdtifp1_pc1	smri_thick_cdk_parstgris	nihtbx_cryst_uncorrected	C_2y~A_bl	0.000129068	0.000357515	0.361013	0.71809	0.000129068	0.00591005
latent_factor_ss_perinatal	dmdtifp1_pc1	smri_thick_cdk_parstgris	nihtbx_cryst_uncorrected	C_2y~B_bl	-0.000637466	0.000568527	-1.12126	0.262178	-0.000637466	-0.0183559
latent_factor_ss_perinatal	dmdtifp1_pc1	smri_thick_cdk_parstgris	nihtbx_cryst_uncorrected	D_2y~A_bl	0.390992	0.123093	3.17641	0.00149113	0.390992	0.0519243
latent_factor_ss_perinatal	dmdtifp1_pc1	smri_thick_cdk_parstgris	nihtbx_cryst_uncorrected	D_2y~B_bl	-0.281384	0.195774	-1.43729	0.150635	-0.281384	-0.0234988
latent_factor_ss_perinatal	dmdtifp1_pc1	smri_thick_cdk_parstgris	nihtbx_cryst_uncorrected	D_2y~C_2y	-0.260136	5.63434	-0.0461697	0.963175	-0.260136	-0.000754446
latent_factor_ss_perinatal	dmdtifp1_pc1	smri_thick_cdk_parstgris	nihtbx_cryst_uncorrected	B_bl~~B_bl	0.327921	0.00758922	43.2088	0	0.327921	0.998904
latent_factor_ss_perinatal	dmdtifp1_pc1	smri_thick_cdk_parstgris	nihtbx_cryst_uncorrected	C_2y~~C_2y	0.000395772	9.15954e-06	43.2088	0	0.000395772	0.999621
latent_factor_ss_perinatal	dmdtifp1_pc1	smri_thick_cdk_parstgris	nihtbx_cryst_uncorrected	D_2y~~D_2y	46.9143	1.08576	43.2088	0	46.9143	0.996672
latent_factor_ss_perinatal	dmdtifp1_pc1	smri_thick_cdk_parstgris	nihtbx_cryst_uncorrected	A_bl~~A_bl	0.830153	0	NA	NA	0.830153	1
latent_factor_ss_perinatal	dmdtifp1_pc1	smri_thick_cdk_pericc	nihtbx_cryst_uncorrected	B_bl~A_bl	-0.0208144	0.0102853	-2.0237	0.0430013	-0.0208144	-0.0330994
latent_factor_ss_perinatal	dmdtifp1_pc1	smri_thick_cdk_pericc	nihtbx_cryst_uncorrected	C_2y~A_bl	-8.09319e-05	0.000535849	-0.151035	0.879948	-8.09319e-05	-0.00247216
latent_factor_ss_perinatal	dmdtifp1_pc1	smri_thick_cdk_pericc	nihtbx_cryst_uncorrected	C_2y~B_bl	-0.00137403	0.000852116	-1.6125	0.106854	-0.00137403	-0.0263936
latent_factor_ss_perinatal	dmdtifp1_pc1	smri_thick_cdk_pericc	nihtbx_cryst_uncorrected	D_2y~A_bl	0.390636	0.123072	3.17403	0.00150336	0.390636	0.051877
latent_factor_ss_perinatal	dmdtifp1_pc1	smri_thick_cdk_pericc	nihtbx_cryst_uncorrected	D_2y~B_bl	-0.286699	0.195779	-1.4644	0.143086	-0.286699	-0.0239426
latent_factor_ss_perinatal	dmdtifp1_pc1	smri_thick_cdk_pericc	nihtbx_cryst_uncorrected	D_2y~C_2y	-3.98876	3.75863	-1.06123	0.288586	-3.98876	-0.0173414
latent_factor_ss_perinatal	dmdtifp1_pc1	smri_thick_cdk_pericc	nihtbx_cryst_uncorrected	B_bl~~B_bl	0.327921	0.00758922	43.2088	0	0.327921	0.998904
latent_factor_ss_perinatal	dmdtifp1_pc1	smri_thick_cdk_pericc	nihtbx_cryst_uncorrected	C_2y~~C_2y	0.000889081	2.05764e-05	43.2088	0	0.000889081	0.999302
latent_factor_ss_perinatal	dmdtifp1_pc1	smri_thick_cdk_pericc	nihtbx_cryst_uncorrected	D_2y~~D_2y	46.9002	1.08543	43.2088	0	46.9002	0.996372
latent_factor_ss_perinatal	dmdtifp1_pc1	smri_thick_cdk_pericc	nihtbx_cryst_uncorrected	A_bl~~A_bl	0.830153	0	NA	NA	0.830153	1
latent_factor_ss_perinatal	dmdtifp1_pc1	smri_thick_cdk_postcn	nihtbx_cryst_uncorrected	B_bl~A_bl	-0.0208144	0.0102853	-2.0237	0.0430012	-0.0208144	-0.0330994
latent_factor_ss_perinatal	dmdtifp1_pc1	smri_thick_cdk_postcn	nihtbx_cryst_uncorrected	C_2y~A_bl	-0.000503532	0.000320596	-1.57061	0.116272	-0.000503532	-0.0257054
latent_factor_ss_perinatal	dmdtifp1_pc1	smri_thick_cdk_postcn	nihtbx_cryst_uncorrected	C_2y~B_bl	0.000454682	0.000509817	0.891853	0.372472	0.000454682	0.0145965
latent_factor_ss_perinatal	dmdtifp1_pc1	smri_thick_cdk_postcn	nihtbx_cryst_uncorrected	D_2y~A_bl	0.395953	0.12309	3.21678	0.00129639	0.395953	0.0525831
latent_factor_ss_perinatal	dmdtifp1_pc1	smri_thick_cdk_postcn	nihtbx_cryst_uncorrected	D_2y~B_bl	-0.285728	0.195696	-1.46006	0.144274	-0.285728	-0.0238616
latent_factor_ss_perinatal	dmdtifp1_pc1	smri_thick_cdk_postcn	nihtbx_cryst_uncorrected	D_2y~C_2y	9.91983	6.28109	1.57932	0.114263	9.91983	0.0258053
latent_factor_ss_perinatal	dmdtifp1_pc1	smri_thick_cdk_postcn	nihtbx_cryst_uncorrected	B_bl~~B_bl	0.327921	0.00758922	43.2088	0	0.327921	0.998904
latent_factor_ss_perinatal	dmdtifp1_pc1	smri_thick_cdk_postcn	nihtbx_cryst_uncorrected	C_2y~~C_2y	0.000318252	7.36545e-06	43.2088	0	0.000318252	0.999101
latent_factor_ss_perinatal	dmdtifp1_pc1	smri_thick_cdk_postcn	nihtbx_cryst_uncorrected	D_2y~~D_2y	46.883	1.08503	43.2088	0	46.883	0.996007
latent_factor_ss_perinatal	dmdtifp1_pc1	smri_thick_cdk_postcn	nihtbx_cryst_uncorrected	A_bl~~A_bl	0.830153	0	NA	NA	0.830153	1
latent_factor_ss_perinatal	dmdtifp1_pc1	smri_thick_cdk_ptcate	nihtbx_cryst_uncorrected	B_bl~A_bl	-0.0208144	0.0102853	-2.0237	0.0430013	-0.0208144	-0.0330994
latent_factor_ss_perinatal	dmdtifp1_pc1	smri_thick_cdk_ptcate	nihtbx_cryst_uncorrected	C_2y~A_bl	-0.000317136	0.000365869	-0.866802	0.38605	-0.000317136	-0.0141396
latent_factor_ss_perinatal	dmdtifp1_pc1	smri_thick_cdk_ptcate	nihtbx_cryst_uncorrected	C_2y~B_bl	0.00302946	0.00058181	5.20695	1.91967e-07	0.00302946	0.0849378
latent_factor_ss_perinatal	dmdtifp1_pc1	smri_thick_cdk_ptcate	nihtbx_cryst_uncorrected	D_2y~A_bl	0.389063	0.123084	3.16097	0.00157245	0.389063	0.0516681
latent_factor_ss_perinatal	dmdtifp1_pc1	smri_thick_cdk_ptcate	nihtbx_cryst_uncorrected	D_2y~B_bl	-0.263112	0.196419	-1.33954	0.180394	-0.263112	-0.0219729
latent_factor_ss_perinatal	dmdtifp1_pc1	smri_thick_cdk_ptcate	nihtbx_cryst_uncorrected	D_2y~C_2y	-5.97656	5.50483	-1.08569	0.277615	-5.97656	-0.0178017
latent_factor_ss_perinatal	dmdtifp1_pc1	smri_thick_cdk_ptcate	nihtbx_cryst_uncorrected	B_bl~~B_bl	0.327921	0.00758922	43.2088	0	0.327921	0.998904
latent_factor_ss_perinatal	dmdtifp1_pc1	smri_thick_cdk_ptcate	nihtbx_cryst_uncorrected	C_2y~~C_2y	0.000414483	9.59256e-06	43.2088	0	0.000414483	0.992506
latent_factor_ss_perinatal	dmdtifp1_pc1	smri_thick_cdk_ptcate	nihtbx_cryst_uncorrected	D_2y~~D_2y	46.8995	1.08542	43.2088	0	46.8995	0.996358
latent_factor_ss_perinatal	dmdtifp1_pc1	smri_thick_cdk_ptcate	nihtbx_cryst_uncorrected	A_bl~~A_bl	0.830153	0	NA	NA	0.830153	1
latent_factor_ss_perinatal	dmdtifp1_pc1	smri_thick_cdk_precn	nihtbx_cryst_uncorrected	B_bl~A_bl	-0.0208144	0.0102853	-2.0237	0.0430013	-0.0208144	-0.0330994
latent_factor_ss_perinatal	dmdtifp1_pc1	smri_thick_cdk_precn	nihtbx_cryst_uncorrected	C_2y~A_bl	0.000245254	0.000292876	0.837397	0.402369	0.000245254	0.0136891
latent_factor_ss_perinatal	dmdtifp1_pc1	smri_thick_cdk_precn	nihtbx_cryst_uncorrected	C_2y~B_bl	0.00158978	0.000465737	3.41348	0.000641393	0.00158978	0.0558009
latent_factor_ss_perinatal	dmdtifp1_pc1	smri_thick_cdk_precn	nihtbx_cryst_uncorrected	D_2y~A_bl	0.394291	0.123038	3.20463	0.00135236	0.394291	0.0523623
latent_factor_ss_perinatal	dmdtifp1_pc1	smri_thick_cdk_precn	nihtbx_cryst_uncorrected	D_2y~B_bl	-0.259619	0.195943	-1.32497	0.185181	-0.259619	-0.0216812
latent_factor_ss_perinatal	dmdtifp1_pc1	smri_thick_cdk_precn	nihtbx_cryst_uncorrected	D_2y~C_2y	-13.5859	6.87426	-1.97634	0.0481166	-13.5859	-0.0323244
latent_factor_ss_perinatal	dmdtifp1_pc1	smri_thick_cdk_precn	nihtbx_cryst_uncorrected	B_bl~~B_bl	0.327921	0.00758922	43.2088	0	0.327921	0.998904
latent_factor_ss_perinatal	dmdtifp1_pc1	smri_thick_cdk_precn	nihtbx_cryst_uncorrected	C_2y~~C_2y	0.000265598	6.14685e-06	43.2088	0	0.000265598	0.996749
latent_factor_ss_perinatal	dmdtifp1_pc1	smri_thick_cdk_precn	nihtbx_cryst_uncorrected	D_2y~~D_2y	46.8653	1.08462	43.2088	0	46.8653	0.995631
latent_factor_ss_perinatal	dmdtifp1_pc1	smri_thick_cdk_precn	nihtbx_cryst_uncorrected	A_bl~~A_bl	0.830153	0	NA	NA	0.830153	1
latent_factor_ss_perinatal	dmdtifp1_pc1	smri_thick_cdk_pc	nihtbx_cryst_uncorrected	B_bl~A_bl	-0.0208144	0.0102853	-2.0237	0.0430013	-0.0208144	-0.0330994
latent_factor_ss_perinatal	dmdtifp1_pc1	smri_thick_cdk_pc	nihtbx_cryst_uncorrected	C_2y~A_bl	-0.000131815	0.000230558	-0.571722	0.56751	-0.000131815	-0.00933938
latent_factor_ss_perinatal	dmdtifp1_pc1	smri_thick_cdk_pc	nihtbx_cryst_uncorrected	C_2y~B_bl	0.00151327	0.000366637	4.12743	3.66846e-05	0.00151327	0.0674237
latent_factor_ss_perinatal	dmdtifp1_pc1	smri_thick_cdk_pc	nihtbx_cryst_uncorrected	D_2y~A_bl	0.389711	0.123077	3.16641	0.00154333	0.389711	0.0517541
latent_factor_ss_perinatal	dmdtifp1_pc1	smri_thick_cdk_pc	nihtbx_cryst_uncorrected	D_2y~B_bl	-0.266895	0.196156	-1.36063	0.173631	-0.266895	-0.0222888
latent_factor_ss_perinatal	dmdtifp1_pc1	smri_thick_cdk_pc	nihtbx_cryst_uncorrected	D_2y~C_2y	-9.46472	8.73553	-1.08347	0.278598	-9.46472	-0.0177401
latent_factor_ss_perinatal	dmdtifp1_pc1	smri_thick_cdk_pc	nihtbx_cryst_uncorrected	B_bl~~B_bl	0.327921	0.00758922	43.2088	0	0.327921	0.998904
latent_factor_ss_perinatal	dmdtifp1_pc1	smri_thick_cdk_pc	nihtbx_cryst_uncorrected	C_2y~~C_2y	0.000164595	3.80929e-06	43.2088	0	0.000164595	0.995325
latent_factor_ss_perinatal	dmdtifp1_pc1	smri_thick_cdk_pc	nihtbx_cryst_uncorrected	D_2y~~D_2y	46.8996	1.08542	43.2088	0	46.8996	0.996359
latent_factor_ss_perinatal	dmdtifp1_pc1	smri_thick_cdk_pc	nihtbx_cryst_uncorrected	A_bl~~A_bl	0.830153	0	NA	NA	0.830153	1
latent_factor_ss_perinatal	dmdtifp1_pc1	smri_thick_cdk_rracate	nihtbx_cryst_uncorrected	B_bl~A_bl	-0.0208144	0.0102853	-2.0237	0.0430013	-0.0208144	-0.0330994
latent_factor_ss_perinatal	dmdtifp1_pc1	smri_thick_cdk_rracate	nihtbx_cryst_uncorrected	C_2y~A_bl	-0.00255178	0.000496265	-5.14197	2.71874e-07	-0.00255178	-0.0828004
latent_factor_ss_perinatal	dmdtifp1_pc1	smri_thick_cdk_rracate	nihtbx_cryst_uncorrected	C_2y~B_bl	0.00776461	0.000789169	9.83896	0	0.00776461	0.158436
latent_factor_ss_perinatal	dmdtifp1_pc1	smri_thick_cdk_rracate	nihtbx_cryst_uncorrected	D_2y~A_bl	0.372531	0.123473	3.0171	0.00255206	0.372531	0.0494726
latent_factor_ss_perinatal	dmdtifp1_pc1	smri_thick_cdk_rracate	nihtbx_cryst_uncorrected	D_2y~B_bl	-0.225145	0.198178	-1.13608	0.255925	-0.225145	-0.0188022
latent_factor_ss_perinatal	dmdtifp1_pc1	smri_thick_cdk_rracate	nihtbx_cryst_uncorrected	D_2y~C_2y	-7.22157	4.05732	-1.77989	0.0750947	-7.22157	-0.0295559
latent_factor_ss_perinatal	dmdtifp1_pc1	smri_thick_cdk_rracate	nihtbx_cryst_uncorrected	B_bl~~B_bl	0.327921	0.00758922	43.2088	0	0.327921	0.998904
latent_factor_ss_perinatal	dmdtifp1_pc1	smri_thick_cdk_rracate	nihtbx_cryst_uncorrected	C_2y~~C_2y	0.000762577	1.76487e-05	43.2088	0	0.000762577	0.967174
latent_factor_ss_perinatal	dmdtifp1_pc1	smri_thick_cdk_rracate	nihtbx_cryst_uncorrected	D_2y~~D_2y	46.8746	1.08484	43.2088	0	46.8746	0.995827
latent_factor_ss_perinatal	dmdtifp1_pc1	smri_thick_cdk_rracate	nihtbx_cryst_uncorrected	A_bl~~A_bl	0.830153	0	NA	NA	0.830153	1
latent_factor_ss_perinatal	dmdtifp1_pc1	smri_thick_cdk_rrmdfr	nihtbx_cryst_uncorrected	B_bl~A_bl	-0.0208144	0.0102853	-2.0237	0.0430013	-0.0208144	-0.0330994
latent_factor_ss_perinatal	dmdtifp1_pc1	smri_thick_cdk_rrmdfr	nihtbx_cryst_uncorrected	C_2y~A_bl	-0.000426604	0.000227914	-1.87178	0.0612372	-0.000426604	-0.0304756
latent_factor_ss_perinatal	dmdtifp1_pc1	smri_thick_cdk_rrmdfr	nihtbx_cryst_uncorrected	C_2y~B_bl	0.00223712	0.000362432	6.17251	6.72137e-10	0.00223712	0.100499
latent_factor_ss_perinatal	dmdtifp1_pc1	smri_thick_cdk_rrmdfr	nihtbx_cryst_uncorrected	D_2y~A_bl	0.383094	0.123077	3.11265	0.00185418	0.383094	0.0508753
latent_factor_ss_perinatal	dmdtifp1_pc1	smri_thick_cdk_rrmdfr	nihtbx_cryst_uncorrected	D_2y~B_bl	-0.239974	0.196622	-1.22048	0.222282	-0.239974	-0.0200405
latent_factor_ss_perinatal	dmdtifp1_pc1	smri_thick_cdk_rrmdfr	nihtbx_cryst_uncorrected	D_2y~C_2y	-18.4362	8.83312	-2.08717	0.0368728	-18.4362	-0.0342725
latent_factor_ss_perinatal	dmdtifp1_pc1	smri_thick_cdk_rrmdfr	nihtbx_cryst_uncorrected	B_bl~~B_bl	0.327921	0.00758922	43.2088	0	0.327921	0.998904
latent_factor_ss_perinatal	dmdtifp1_pc1	smri_thick_cdk_rrmdfr	nihtbx_cryst_uncorrected	C_2y~~C_2y	0.000160841	3.72242e-06	43.2088	0	0.000160841	0.988769
latent_factor_ss_perinatal	dmdtifp1_pc1	smri_thick_cdk_rrmdfr	nihtbx_cryst_uncorrected	D_2y~~D_2y	46.8597	1.08449	43.2088	0	46.8597	0.995511
latent_factor_ss_perinatal	dmdtifp1_pc1	smri_thick_cdk_rrmdfr	nihtbx_cryst_uncorrected	A_bl~~A_bl	0.830153	0	NA	NA	0.830153	1
latent_factor_ss_perinatal	dmdtifp1_pc1	smri_thick_cdk_sufr	nihtbx_cryst_uncorrected	B_bl~A_bl	-0.0208144	0.0102853	-2.0237	0.0430015	-0.0208144	-0.0330994
latent_factor_ss_perinatal	dmdtifp1_pc1	smri_thick_cdk_sufr	nihtbx_cryst_uncorrected	C_2y~A_bl	-0.000511147	0.000155068	-3.29627	0.000979771	-0.000511147	-0.0528722
latent_factor_ss_perinatal	dmdtifp1_pc1	smri_thick_cdk_sufr	nihtbx_cryst_uncorrected	C_2y~B_bl	0.00295296	0.000246592	11.9751	0	0.00295296	0.192081
latent_factor_ss_perinatal	dmdtifp1_pc1	smri_thick_cdk_sufr	nihtbx_cryst_uncorrected	D_2y~A_bl	0.370134	0.123107	3.00661	0.00264182	0.370134	0.0491543
latent_factor_ss_perinatal	dmdtifp1_pc1	smri_thick_cdk_sufr	nihtbx_cryst_uncorrected	D_2y~B_bl	-0.160912	0.199201	-0.807788	0.419213	-0.160912	-0.013438
latent_factor_ss_perinatal	dmdtifp1_pc1	smri_thick_cdk_sufr	nihtbx_cryst_uncorrected	D_2y~C_2y	-40.7406	12.973	-3.1404	0.00168715	-40.7406	-0.0523056
latent_factor_ss_perinatal	dmdtifp1_pc1	smri_thick_cdk_sufr	nihtbx_cryst_uncorrected	B_bl~~B_bl	0.327921	0.00758922	43.2088	0	0.327921	0.998904
latent_factor_ss_perinatal	dmdtifp1_pc1	smri_thick_cdk_sufr	nihtbx_cryst_uncorrected	C_2y~~C_2y	7.44564e-05	1.72318e-06	43.2088	0	7.44564e-05	0.959637
latent_factor_ss_perinatal	dmdtifp1_pc1	smri_thick_cdk_sufr	nihtbx_cryst_uncorrected	D_2y~~D_2y	46.7908	1.0829	43.2088	0	46.7908	0.994047
latent_factor_ss_perinatal	dmdtifp1_pc1	smri_thick_cdk_sufr	nihtbx_cryst_uncorrected	A_bl~~A_bl	0.830153	0	NA	NA	0.830153	1
latent_factor_ss_perinatal	dmdtifp1_pc1	smri_thick_cdk_supl	nihtbx_cryst_uncorrected	B_bl~A_bl	-0.0208144	0.0102853	-2.0237	0.0430013	-0.0208144	-0.0330994
latent_factor_ss_perinatal	dmdtifp1_pc1	smri_thick_cdk_supl	nihtbx_cryst_uncorrected	C_2y~A_bl	-3.0258e-05	0.000205102	-0.147526	0.882717	-3.0258e-05	-0.00241473
latent_factor_ss_perinatal	dmdtifp1_pc1	smri_thick_cdk_supl	nihtbx_cryst_uncorrected	C_2y~B_bl	0.000522791	0.000326157	1.60288	0.108961	0.000522791	0.0262361
latent_factor_ss_perinatal	dmdtifp1_pc1	smri_thick_cdk_supl	nihtbx_cryst_uncorrected	D_2y~A_bl	0.391016	0.12309	3.17666	0.0014898	0.391016	0.0519275
latent_factor_ss_perinatal	dmdtifp1_pc1	smri_thick_cdk_supl	nihtbx_cryst_uncorrected	D_2y~B_bl	-0.282214	0.195807	-1.44129	0.149503	-0.282214	-0.0235681
latent_factor_ss_perinatal	dmdtifp1_pc1	smri_thick_cdk_supl	nihtbx_cryst_uncorrected	D_2y~C_2y	1.90636	9.8212	0.194107	0.846092	1.90636	0.00317233
latent_factor_ss_perinatal	dmdtifp1_pc1	smri_thick_cdk_supl	nihtbx_cryst_uncorrected	B_bl~~B_bl	0.327921	0.00758922	43.2088	0	0.327921	0.998904
latent_factor_ss_perinatal	dmdtifp1_pc1	smri_thick_cdk_supl	nihtbx_cryst_uncorrected	C_2y~~C_2y	0.000130256	3.01457e-06	43.2088	0	0.000130256	0.999302
latent_factor_ss_perinatal	dmdtifp1_pc1	smri_thick_cdk_supl	nihtbx_cryst_uncorrected	D_2y~~D_2y	46.9139	1.08575	43.2088	0	46.9139	0.996662
latent_factor_ss_perinatal	dmdtifp1_pc1	smri_thick_cdk_supl	nihtbx_cryst_uncorrected	A_bl~~A_bl	0.830153	0	NA	NA	0.830153	1
latent_factor_ss_perinatal	dmdtifp1_pc1	smri_thick_cdk_sutm	nihtbx_cryst_uncorrected	B_bl~A_bl	-0.0208144	0.0102853	-2.0237	0.0430013	-0.0208144	-0.0330994
latent_factor_ss_perinatal	dmdtifp1_pc1	smri_thick_cdk_sutm	nihtbx_cryst_uncorrected	C_2y~A_bl	-0.000174499	0.000238357	-0.73209	0.464113	-0.000174499	-0.0119506
latent_factor_ss_perinatal	dmdtifp1_pc1	smri_thick_cdk_sutm	nihtbx_cryst_uncorrected	C_2y~B_bl	0.00178219	0.000379039	4.70185	2.57819e-06	0.00178219	0.0767524
latent_factor_ss_perinatal	dmdtifp1_pc1	smri_thick_cdk_sutm	nihtbx_cryst_uncorrected	D_2y~A_bl	0.390689	0.123099	3.17378	0.00150466	0.390689	0.051884
latent_factor_ss_perinatal	dmdtifp1_pc1	smri_thick_cdk_sutm	nihtbx_cryst_uncorrected	D_2y~B_bl	-0.278464	0.196318	-1.41843	0.156065	-0.278464	-0.023255
latent_factor_ss_perinatal	dmdtifp1_pc1	smri_thick_cdk_sutm	nihtbx_cryst_uncorrected	D_2y~C_2y	-1.54507	8.45099	-0.182827	0.854934	-1.54507	-0.00299609
latent_factor_ss_perinatal	dmdtifp1_pc1	smri_thick_cdk_sutm	nihtbx_cryst_uncorrected	B_bl~~B_bl	0.327921	0.00758922	43.2088	0	0.327921	0.998904
latent_factor_ss_perinatal	dmdtifp1_pc1	smri_thick_cdk_sutm	nihtbx_cryst_uncorrected	C_2y~~C_2y	0.000175919	4.07137e-06	43.2088	0	0.000175919	0.993906
latent_factor_ss_perinatal	dmdtifp1_pc1	smri_thick_cdk_sutm	nihtbx_cryst_uncorrected	D_2y~~D_2y	46.9139	1.08575	43.2088	0	46.9139	0.996663
latent_factor_ss_perinatal	dmdtifp1_pc1	smri_thick_cdk_sutm	nihtbx_cryst_uncorrected	A_bl~~A_bl	0.830153	0	NA	NA	0.830153	1
latent_factor_ss_perinatal	dmdtifp1_pc1	smri_thick_cdk_sm	nihtbx_cryst_uncorrected	B_bl~A_bl	-0.0208144	0.0102853	-2.0237	0.0430013	-0.0208144	-0.0330994
latent_factor_ss_perinatal	dmdtifp1_pc1	smri_thick_cdk_sm	nihtbx_cryst_uncorrected	C_2y~A_bl	0.000677644	0.00030349	2.23284	0.0255595	0.000677644	0.036499
latent_factor_ss_perinatal	dmdtifp1_pc1	smri_thick_cdk_sm	nihtbx_cryst_uncorrected	C_2y~B_bl	-0.00128937	0.000482615	-2.67164	0.00754825	-0.00128937	-0.0436717
latent_factor_ss_perinatal	dmdtifp1_pc1	smri_thick_cdk_sm	nihtbx_cryst_uncorrected	D_2y~A_bl	0.389478	0.123171	3.16209	0.00156639	0.389478	0.0517232
latent_factor_ss_perinatal	dmdtifp1_pc1	smri_thick_cdk_sm	nihtbx_cryst_uncorrected	D_2y~B_bl	-0.2784	0.195925	-1.42096	0.15533	-0.2784	-0.0232496
latent_factor_ss_perinatal	dmdtifp1_pc1	smri_thick_cdk_sm	nihtbx_cryst_uncorrected	D_2y~C_2y	2.18506	6.63723	0.329212	0.741996	2.18506	0.00538748
latent_factor_ss_perinatal	dmdtifp1_pc1	smri_thick_cdk_sm	nihtbx_cryst_uncorrected	B_bl~~B_bl	0.327921	0.00758922	43.2088	0	0.327921	0.998904
latent_factor_ss_perinatal	dmdtifp1_pc1	smri_thick_cdk_sm	nihtbx_cryst_uncorrected	C_2y~~C_2y	0.000285197	6.60043e-06	43.2088	0	0.000285197	0.996655
latent_factor_ss_perinatal	dmdtifp1_pc1	smri_thick_cdk_sm	nihtbx_cryst_uncorrected	D_2y~~D_2y	46.913	1.08573	43.2088	0	46.913	0.996643
latent_factor_ss_perinatal	dmdtifp1_pc1	smri_thick_cdk_sm	nihtbx_cryst_uncorrected	A_bl~~A_bl	0.830153	0	NA	NA	0.830153	1
latent_factor_ss_perinatal	dmdtifp1_pc1	smri_thick_cdk_frpole	nihtbx_cryst_uncorrected	B_bl~A_bl	-0.0208144	0.0102853	-2.0237	0.0430013	-0.0208144	-0.0330994
latent_factor_ss_perinatal	dmdtifp1_pc1	smri_thick_cdk_frpole	nihtbx_cryst_uncorrected	C_2y~A_bl	0.00123763	0.000730239	1.69483	0.0901075	0.00123763	0.0277209
latent_factor_ss_perinatal	dmdtifp1_pc1	smri_thick_cdk_frpole	nihtbx_cryst_uncorrected	C_2y~B_bl	0.00271502	0.00116124	2.33804	0.0193851	0.00271502	0.0382414
latent_factor_ss_perinatal	dmdtifp1_pc1	smri_thick_cdk_frpole	nihtbx_cryst_uncorrected	D_2y~A_bl	0.393426	0.123129	3.19523	0.0013972	0.393426	0.0522475
latent_factor_ss_perinatal	dmdtifp1_pc1	smri_thick_cdk_frpole	nihtbx_cryst_uncorrected	D_2y~B_bl	-0.275805	0.19587	-1.4081	0.159102	-0.275805	-0.0230329
latent_factor_ss_perinatal	dmdtifp1_pc1	smri_thick_cdk_frpole	nihtbx_cryst_uncorrected	D_2y~C_2y	-1.99372	2.7583	-0.722805	0.4698	-1.99372	-0.0118209
latent_factor_ss_perinatal	dmdtifp1_pc1	smri_thick_cdk_frpole	nihtbx_cryst_uncorrected	B_bl~~B_bl	0.327921	0.00758922	43.2088	0	0.327921	0.998904
latent_factor_ss_perinatal	dmdtifp1_pc1	smri_thick_cdk_frpole	nihtbx_cryst_uncorrected	C_2y~~C_2y	0.00165115	3.82133e-05	43.2088	0	0.00165115	0.997839
latent_factor_ss_perinatal	dmdtifp1_pc1	smri_thick_cdk_frpole	nihtbx_cryst_uncorrected	D_2y~~D_2y	46.9078	1.08561	43.2088	0	46.9078	0.996533
latent_factor_ss_perinatal	dmdtifp1_pc1	smri_thick_cdk_frpole	nihtbx_cryst_uncorrected	A_bl~~A_bl	0.830153	0	NA	NA	0.830153	1
latent_factor_ss_perinatal	dmdtifp1_pc1	smri_thick_cdk_tmpole	nihtbx_cryst_uncorrected	B_bl~A_bl	-0.0208144	0.0102853	-2.0237	0.0430013	-0.0208144	-0.0330994
latent_factor_ss_perinatal	dmdtifp1_pc1	smri_thick_cdk_tmpole	nihtbx_cryst_uncorrected	C_2y~A_bl	-0.000675639	0.000609383	-1.10873	0.267548	-0.000675639	-0.018103
latent_factor_ss_perinatal	dmdtifp1_pc1	smri_thick_cdk_tmpole	nihtbx_cryst_uncorrected	C_2y~B_bl	-0.00435493	0.000969051	-4.49402	6.98905e-06	-0.00435493	-0.0733772
latent_factor_ss_perinatal	dmdtifp1_pc1	smri_thick_cdk_tmpole	nihtbx_cryst_uncorrected	D_2y~A_bl	0.393107	0.123096	3.19351	0.00140554	0.393107	0.0522051
latent_factor_ss_perinatal	dmdtifp1_pc1	smri_thick_cdk_tmpole	nihtbx_cryst_uncorrected	D_2y~B_bl	-0.267371	0.196245	-1.36243	0.173061	-0.267371	-0.0223285
latent_factor_ss_perinatal	dmdtifp1_pc1	smri_thick_cdk_tmpole	nihtbx_cryst_uncorrected	D_2y~C_2y	3.17962	3.30517	0.962013	0.336043	3.17962	0.0157594
latent_factor_ss_perinatal	dmdtifp1_pc1	smri_thick_cdk_tmpole	nihtbx_cryst_uncorrected	B_bl~~B_bl	0.327921	0.00758922	43.2088	0	0.327921	0.998904
latent_factor_ss_perinatal	dmdtifp1_pc1	smri_thick_cdk_tmpole	nihtbx_cryst_uncorrected	C_2y~~C_2y	0.00114984	2.66112e-05	43.2088	0	0.00114984	0.994376
latent_factor_ss_perinatal	dmdtifp1_pc1	smri_thick_cdk_tmpole	nihtbx_cryst_uncorrected	D_2y~~D_2y	46.9027	1.08549	43.2088	0	46.9027	0.996425
latent_factor_ss_perinatal	dmdtifp1_pc1	smri_thick_cdk_tmpole	nihtbx_cryst_uncorrected	A_bl~~A_bl	0.830153	0	NA	NA	0.830153	1
latent_factor_ss_perinatal	dmdtifp1_pc1	smri_thick_cdk_trvtm	nihtbx_cryst_uncorrected	B_bl~A_bl	-0.0208144	0.0102853	-2.0237	0.0430013	-0.0208144	-0.0330994
latent_factor_ss_perinatal	dmdtifp1_pc1	smri_thick_cdk_trvtm	nihtbx_cryst_uncorrected	C_2y~A_bl	-0.0014411	0.00054148	-2.66142	0.0077812	-0.0014411	-0.0432863
latent_factor_ss_perinatal	dmdtifp1_pc1	smri_thick_cdk_trvtm	nihtbx_cryst_uncorrected	C_2y~B_bl	0.00559104	0.00086107	6.49314	8.40681e-11	0.00559104	0.105607
latent_factor_ss_perinatal	dmdtifp1_pc1	smri_thick_cdk_trvtm	nihtbx_cryst_uncorrected	D_2y~A_bl	0.382819	0.123169	3.10808	0.00188309	0.382819	0.0508389
latent_factor_ss_perinatal	dmdtifp1_pc1	smri_thick_cdk_trvtm	nihtbx_cryst_uncorrected	D_2y~B_bl	-0.24964	0.196782	-1.26861	0.204579	-0.24964	-0.0208478
latent_factor_ss_perinatal	dmdtifp1_pc1	smri_thick_cdk_trvtm	nihtbx_cryst_uncorrected	D_2y~C_2y	-5.64793	3.71896	-1.51868	0.128842	-5.64793	-0.024971
latent_factor_ss_perinatal	dmdtifp1_pc1	smri_thick_cdk_trvtm	nihtbx_cryst_uncorrected	B_bl~~B_bl	0.327921	0.00758922	43.2088	0	0.327921	0.998904
latent_factor_ss_perinatal	dmdtifp1_pc1	smri_thick_cdk_trvtm	nihtbx_cryst_uncorrected	C_2y~~C_2y	0.000907863	2.10111e-05	43.2088	0	0.000907863	0.986671
latent_factor_ss_perinatal	dmdtifp1_pc1	smri_thick_cdk_trvtm	nihtbx_cryst_uncorrected	D_2y~~D_2y	46.8854	1.08509	43.2088	0	46.8854	0.996057
latent_factor_ss_perinatal	dmdtifp1_pc1	smri_thick_cdk_trvtm	nihtbx_cryst_uncorrected	A_bl~~A_bl	0.830153	0	NA	NA	0.830153	1
latent_factor_ss_perinatal	dmdtifp1_pc1	smri_thick_cdk_insula	nihtbx_cryst_uncorrected	B_bl~A_bl	-0.0208144	0.0102853	-2.0237	0.0430013	-0.0208144	-0.0330994
latent_factor_ss_perinatal	dmdtifp1_pc1	smri_thick_cdk_insula	nihtbx_cryst_uncorrected	C_2y~A_bl	-0.000123989	0.000347851	-0.356443	0.721509	-0.000123989	-0.00575756
latent_factor_ss_perinatal	dmdtifp1_pc1	smri_thick_cdk_insula	nihtbx_cryst_uncorrected	C_2y~B_bl	-0.00561098	0.000553159	-10.1435	0	-0.00561098	-0.163847
latent_factor_ss_perinatal	dmdtifp1_pc1	smri_thick_cdk_insula	nihtbx_cryst_uncorrected	D_2y~A_bl	0.391067	0.123092	3.17702	0.00148796	0.391067	0.0519342
latent_factor_ss_perinatal	dmdtifp1_pc1	smri_thick_cdk_insula	nihtbx_cryst_uncorrected	D_2y~B_bl	-0.276324	0.198419	-1.39263	0.163731	-0.276324	-0.0230762
latent_factor_ss_perinatal	dmdtifp1_pc1	smri_thick_cdk_insula	nihtbx_cryst_uncorrected	D_2y~C_2y	0.872223	5.79086	0.150621	0.880275	0.872223	0.00249445
latent_factor_ss_perinatal	dmdtifp1_pc1	smri_thick_cdk_insula	nihtbx_cryst_uncorrected	B_bl~~B_bl	0.327921	0.00758922	43.2088	0	0.327921	0.998904
latent_factor_ss_perinatal	dmdtifp1_pc1	smri_thick_cdk_insula	nihtbx_cryst_uncorrected	C_2y~~C_2y	0.000374665	8.67104e-06	43.2088	0	0.000374665	0.973184
latent_factor_ss_perinatal	dmdtifp1_pc1	smri_thick_cdk_insula	nihtbx_cryst_uncorrected	D_2y~~D_2y	46.9141	1.08575	43.2088	0	46.9141	0.996666
latent_factor_ss_perinatal	dmdtifp1_pc1	smri_thick_cdk_insula	nihtbx_cryst_uncorrected	A_bl~~A_bl	0.830153	0	NA	NA	0.830153	1
latent_factor_ss_perinatal	dmdtifp1_pc1	smri_vol_scs_cbwmatter	nihtbx_cryst_uncorrected	B_bl~A_bl	-0.0208144	0.0102853	-2.0237	0.0430013	-0.0208144	-0.0330994
latent_factor_ss_perinatal	dmdtifp1_pc1	smri_vol_scs_cbwmatter	nihtbx_cryst_uncorrected	C_2y~A_bl	-1.88874e-05	7.87344e-05	-0.239887	0.810418	-1.88874e-05	-0.00392524
latent_factor_ss_perinatal	dmdtifp1_pc1	smri_vol_scs_cbwmatter	nihtbx_cryst_uncorrected	C_2y~B_bl	0.000277778	0.000125205	2.21859	0.0265147	0.000277778	0.0363025
latent_factor_ss_perinatal	dmdtifp1_pc1	smri_vol_scs_cbwmatter	nihtbx_cryst_uncorrected	D_2y~A_bl	0.391194	0.123088	3.17817	0.00148207	0.391194	0.051951
latent_factor_ss_perinatal	dmdtifp1_pc1	smri_vol_scs_cbwmatter	nihtbx_cryst_uncorrected	D_2y~B_bl	-0.284671	0.195863	-1.45342	0.146108	-0.284671	-0.0237733
latent_factor_ss_perinatal	dmdtifp1_pc1	smri_vol_scs_cbwmatter	nihtbx_cryst_uncorrected	D_2y~C_2y	12.4309	25.5835	0.485895	0.627041	12.4309	0.00794346
latent_factor_ss_perinatal	dmdtifp1_pc1	smri_vol_scs_cbwmatter	nihtbx_cryst_uncorrected	B_bl~~B_bl	0.327921	0.00758922	43.2088	0	0.327921	0.998904
latent_factor_ss_perinatal	dmdtifp1_pc1	smri_vol_scs_cbwmatter	nihtbx_cryst_uncorrected	C_2y~~C_2y	1.91949e-05	4.44235e-07	43.2088	0	1.91949e-05	0.998657
latent_factor_ss_perinatal	dmdtifp1_pc1	smri_vol_scs_cbwmatter	nihtbx_cryst_uncorrected	D_2y~~D_2y	46.9114	1.08569	43.2088	0	46.9114	0.996609
latent_factor_ss_perinatal	dmdtifp1_pc1	smri_vol_scs_cbwmatter	nihtbx_cryst_uncorrected	A_bl~~A_bl	0.830153	0	NA	NA	0.830153	1
latent_factor_ss_perinatal	dmdtifp1_pc1	smri_vol_scs_ltventricle	nihtbx_cryst_uncorrected	B_bl~A_bl	-0.0208144	0.0102853	-2.0237	0.0430013	-0.0208144	-0.0330994
latent_factor_ss_perinatal	dmdtifp1_pc1	smri_vol_scs_ltventricle	nihtbx_cryst_uncorrected	C_2y~A_bl	0.00037658	0.00199438	0.188821	0.850233	0.00037658	0.00309089
latent_factor_ss_perinatal	dmdtifp1_pc1	smri_vol_scs_ltventricle	nihtbx_cryst_uncorrected	C_2y~B_bl	-0.00443002	0.0031715	-1.39682	0.162467	-0.00443002	-0.0228652
latent_factor_ss_perinatal	dmdtifp1_pc1	smri_vol_scs_ltventricle	nihtbx_cryst_uncorrected	D_2y~A_bl	0.390876	0.12309	3.17552	0.00149568	0.390876	0.0519088
latent_factor_ss_perinatal	dmdtifp1_pc1	smri_vol_scs_ltventricle	nihtbx_cryst_uncorrected	D_2y~B_bl	-0.280247	0.195791	-1.43136	0.152327	-0.280247	-0.0234038
latent_factor_ss_perinatal	dmdtifp1_pc1	smri_vol_scs_ltventricle	nihtbx_cryst_uncorrected	D_2y~C_2y	0.219231	1.01001	0.217058	0.828163	0.219231	0.00354714
latent_factor_ss_perinatal	dmdtifp1_pc1	smri_vol_scs_ltventricle	nihtbx_cryst_uncorrected	B_bl~~B_bl	0.327921	0.00758922	43.2088	0	0.327921	0.998904
latent_factor_ss_perinatal	dmdtifp1_pc1	smri_vol_scs_ltventricle	nihtbx_cryst_uncorrected	C_2y~~C_2y	0.0123161	0.000285037	43.2088	0	0.0123161	0.999463
latent_factor_ss_perinatal	dmdtifp1_pc1	smri_vol_scs_ltventricle	nihtbx_cryst_uncorrected	D_2y~~D_2y	46.9138	1.08575	43.2088	0	46.9138	0.996659
latent_factor_ss_perinatal	dmdtifp1_pc1	smri_vol_scs_ltventricle	nihtbx_cryst_uncorrected	A_bl~~A_bl	0.830153	0	NA	NA	0.830153	1
latent_factor_ss_perinatal	dmdtifp1_pc1	smri_vol_scs_inflatvent	nihtbx_cryst_uncorrected	B_bl~A_bl	-0.0208144	0.0102853	-2.0237	0.0430013	-0.0208144	-0.0330994
latent_factor_ss_perinatal	dmdtifp1_pc1	smri_vol_scs_inflatvent	nihtbx_cryst_uncorrected	C_2y~A_bl	0.00056956	0.00324448	0.175547	0.86065	0.00056956	0.00287195
latent_factor_ss_perinatal	dmdtifp1_pc1	smri_vol_scs_inflatvent	nihtbx_cryst_uncorrected	C_2y~B_bl	-0.0129058	0.00515943	-2.50139	0.0123706	-0.0129058	-0.0409228
latent_factor_ss_perinatal	dmdtifp1_pc1	smri_vol_scs_inflatvent	nihtbx_cryst_uncorrected	D_2y~A_bl	0.390693	0.123082	3.17425	0.00150223	0.390693	0.0518845
latent_factor_ss_perinatal	dmdtifp1_pc1	smri_vol_scs_inflatvent	nihtbx_cryst_uncorrected	D_2y~B_bl	-0.275188	0.19589	-1.40481	0.160077	-0.275188	-0.0229814
latent_factor_ss_perinatal	dmdtifp1_pc1	smri_vol_scs_inflatvent	nihtbx_cryst_uncorrected	D_2y~C_2y	0.46719	0.62081	0.752549	0.451721	0.46719	0.0123043
latent_factor_ss_perinatal	dmdtifp1_pc1	smri_vol_scs_inflatvent	nihtbx_cryst_uncorrected	B_bl~~B_bl	0.327921	0.00758922	43.2088	0	0.327921	0.998904
latent_factor_ss_perinatal	dmdtifp1_pc1	smri_vol_scs_inflatvent	nihtbx_cryst_uncorrected	C_2y~~C_2y	0.0325947	0.000754354	43.2088	0	0.0325947	0.998309
latent_factor_ss_perinatal	dmdtifp1_pc1	smri_vol_scs_inflatvent	nihtbx_cryst_uncorrected	D_2y~~D_2y	46.9072	1.08559	43.2088	0	46.9072	0.996521
latent_factor_ss_perinatal	dmdtifp1_pc1	smri_vol_scs_inflatvent	nihtbx_cryst_uncorrected	A_bl~~A_bl	0.830153	0	NA	NA	0.830153	1
latent_factor_ss_perinatal	dmdtifp1_pc1	smri_vol_scs_crbwmatter	nihtbx_cryst_uncorrected	B_bl~A_bl	-0.0208144	0.0102853	-2.0237	0.0430014	-0.0208144	-0.0330994
latent_factor_ss_perinatal	dmdtifp1_pc1	smri_vol_scs_crbwmatter	nihtbx_cryst_uncorrected	C_2y~A_bl	0.000454291	0.000560021	0.811203	0.417249	0.000454291	0.0132808
latent_factor_ss_perinatal	dmdtifp1_pc1	smri_vol_scs_crbwmatter	nihtbx_cryst_uncorrected	C_2y~B_bl	0.000496479	0.000890555	0.557493	0.57719	0.000496479	0.00912717
latent_factor_ss_perinatal	dmdtifp1_pc1	smri_vol_scs_crbwmatter	nihtbx_cryst_uncorrected	D_2y~A_bl	0.392446	0.123088	3.18834	0.0014309	0.392446	0.0521173
latent_factor_ss_perinatal	dmdtifp1_pc1	smri_vol_scs_crbwmatter	nihtbx_cryst_uncorrected	D_2y~B_bl	-0.279593	0.195727	-1.42848	0.153153	-0.279593	-0.0233492
latent_factor_ss_perinatal	dmdtifp1_pc1	smri_vol_scs_crbwmatter	nihtbx_cryst_uncorrected	D_2y~C_2y	-3.27414	3.59654	-0.910359	0.362633	-3.27414	-0.0148733
latent_factor_ss_perinatal	dmdtifp1_pc1	smri_vol_scs_crbwmatter	nihtbx_cryst_uncorrected	B_bl~~B_bl	0.327921	0.00758922	43.2088	0	0.327921	0.998904
latent_factor_ss_perinatal	dmdtifp1_pc1	smri_vol_scs_crbwmatter	nihtbx_cryst_uncorrected	C_2y~~C_2y	0.000971103	2.24747e-05	43.2088	0	0.000971103	0.999748
latent_factor_ss_perinatal	dmdtifp1_pc1	smri_vol_scs_crbwmatter	nihtbx_cryst_uncorrected	D_2y~~D_2y	46.9039	1.08552	43.2088	0	46.9039	0.996451
latent_factor_ss_perinatal	dmdtifp1_pc1	smri_vol_scs_crbwmatter	nihtbx_cryst_uncorrected	A_bl~~A_bl	0.830153	0	NA	NA	0.830153	1
latent_factor_ss_perinatal	dmdtifp1_pc1	smri_vol_scs_crbcortex	nihtbx_cryst_uncorrected	B_bl~A_bl	-0.0208144	0.0102853	-2.0237	0.0430013	-0.0208144	-0.0330994
latent_factor_ss_perinatal	dmdtifp1_pc1	smri_vol_scs_crbcortex	nihtbx_cryst_uncorrected	C_2y~A_bl	1.40612e-05	0.000235281	0.0597634	0.952344	1.40612e-05	0.00097646
latent_factor_ss_perinatal	dmdtifp1_pc1	smri_vol_scs_crbcortex	nihtbx_cryst_uncorrected	C_2y~B_bl	0.00149925	0.000374148	4.00711	6.1465e-05	0.00149925	0.0654712
latent_factor_ss_perinatal	dmdtifp1_pc1	smri_vol_scs_crbcortex	nihtbx_cryst_uncorrected	D_2y~A_bl	0.390918	0.123089	3.17591	0.0014937	0.390918	0.0519144
latent_factor_ss_perinatal	dmdtifp1_pc1	smri_vol_scs_crbcortex	nihtbx_cryst_uncorrected	D_2y~B_bl	-0.285522	0.196158	-1.45557	0.145511	-0.285522	-0.0238444
latent_factor_ss_perinatal	dmdtifp1_pc1	smri_vol_scs_crbcortex	nihtbx_cryst_uncorrected	D_2y~C_2y	2.87103	8.56139	0.335346	0.737364	2.87103	0.00549045
latent_factor_ss_perinatal	dmdtifp1_pc1	smri_vol_scs_crbcortex	nihtbx_cryst_uncorrected	B_bl~~B_bl	0.327921	0.00758922	43.2088	0	0.327921	0.998904
latent_factor_ss_perinatal	dmdtifp1_pc1	smri_vol_scs_crbcortex	nihtbx_cryst_uncorrected	C_2y~~C_2y	0.000171407	3.96696e-06	43.2088	0	0.000171407	0.995717
latent_factor_ss_perinatal	dmdtifp1_pc1	smri_vol_scs_crbcortex	nihtbx_cryst_uncorrected	D_2y~~D_2y	46.9129	1.08573	43.2088	0	46.9129	0.996642
latent_factor_ss_perinatal	dmdtifp1_pc1	smri_vol_scs_crbcortex	nihtbx_cryst_uncorrected	A_bl~~A_bl	0.830153	0	NA	NA	0.830153	1
latent_factor_ss_perinatal	dmdtifp1_pc1	smri_vol_scs_tp	nihtbx_cryst_uncorrected	B_bl~A_bl	-0.0208144	0.0102853	-2.0237	0.0430013	-0.0208144	-0.0330994
latent_factor_ss_perinatal	dmdtifp1_pc1	smri_vol_scs_tp	nihtbx_cryst_uncorrected	C_2y~A_bl	-0.000594561	0.000409573	-1.45166	0.146596	-0.000594561	-0.0237622
latent_factor_ss_perinatal	dmdtifp1_pc1	smri_vol_scs_tp	nihtbx_cryst_uncorrected	C_2y~B_bl	0.000197956	0.000651311	0.303935	0.761177	0.000197956	0.0049751
latent_factor_ss_perinatal	dmdtifp1_pc1	smri_vol_scs_tp	nihtbx_cryst_uncorrected	D_2y~A_bl	0.390431	0.123125	3.17102	0.00151904	0.390431	0.0518498
latent_factor_ss_perinatal	dmdtifp1_pc1	smri_vol_scs_tp	nihtbx_cryst_uncorrected	D_2y~B_bl	-0.281042	0.195742	-1.43578	0.151066	-0.281042	-0.0234702
latent_factor_ss_perinatal	dmdtifp1_pc1	smri_vol_scs_tp	nihtbx_cryst_uncorrected	D_2y~C_2y	-0.887261	4.91817	-0.180405	0.856835	-0.887261	-0.00294825
latent_factor_ss_perinatal	dmdtifp1_pc1	smri_vol_scs_tp	nihtbx_cryst_uncorrected	B_bl~~B_bl	0.327921	0.00758922	43.2088	0	0.327921	0.998904
latent_factor_ss_perinatal	dmdtifp1_pc1	smri_vol_scs_tp	nihtbx_cryst_uncorrected	C_2y~~C_2y	0.000519422	1.20212e-05	43.2088	0	0.000519422	0.999403
latent_factor_ss_perinatal	dmdtifp1_pc1	smri_vol_scs_tp	nihtbx_cryst_uncorrected	D_2y~~D_2y	46.9139	1.08575	43.2088	0	46.9139	0.996663
latent_factor_ss_perinatal	dmdtifp1_pc1	smri_vol_scs_tp	nihtbx_cryst_uncorrected	A_bl~~A_bl	0.830153	0	NA	NA	0.830153	1
latent_factor_ss_perinatal	dmdtifp1_pc1	smri_vol_scs_caudate	nihtbx_cryst_uncorrected	B_bl~A_bl	-0.0208144	0.0102853	-2.0237	0.0430013	-0.0208144	-0.0330994
latent_factor_ss_perinatal	dmdtifp1_pc1	smri_vol_scs_caudate	nihtbx_cryst_uncorrected	C_2y~A_bl	-0.000241978	0.000334414	-0.723588	0.469319	-0.000241978	-0.0118303
latent_factor_ss_perinatal	dmdtifp1_pc1	smri_vol_scs_caudate	nihtbx_cryst_uncorrected	C_2y~B_bl	0.00171676	0.00053179	3.22826	0.00124546	0.00171676	0.0527806
latent_factor_ss_perinatal	dmdtifp1_pc1	smri_vol_scs_caudate	nihtbx_cryst_uncorrected	D_2y~A_bl	0.391353	0.123098	3.1792	0.00147683	0.391353	0.0519722
latent_factor_ss_perinatal	dmdtifp1_pc1	smri_vol_scs_caudate	nihtbx_cryst_uncorrected	D_2y~B_bl	-0.284014	0.196012	-1.44897	0.147347	-0.284014	-0.0237185
latent_factor_ss_perinatal	dmdtifp1_pc1	smri_vol_scs_caudate	nihtbx_cryst_uncorrected	D_2y~C_2y	1.629	6.02351	0.270441	0.786821	1.629	0.00442489
latent_factor_ss_perinatal	dmdtifp1_pc1	smri_vol_scs_caudate	nihtbx_cryst_uncorrected	B_bl~~B_bl	0.327921	0.00758922	43.2088	0	0.327921	0.998904
latent_factor_ss_perinatal	dmdtifp1_pc1	smri_vol_scs_caudate	nihtbx_cryst_uncorrected	C_2y~~C_2y	0.000346277	8.01404e-06	43.2088	0	0.000346277	0.997033
latent_factor_ss_perinatal	dmdtifp1_pc1	smri_vol_scs_caudate	nihtbx_cryst_uncorrected	D_2y~~D_2y	46.9134	1.08574	43.2088	0	46.9134	0.996653
latent_factor_ss_perinatal	dmdtifp1_pc1	smri_vol_scs_caudate	nihtbx_cryst_uncorrected	A_bl~~A_bl	0.830153	0	NA	NA	0.830153	1
latent_factor_ss_perinatal	dmdtifp1_pc1	smri_vol_scs_putamen	nihtbx_cryst_uncorrected	B_bl~A_bl	-0.0208144	0.0102853	-2.0237	0.0430013	-0.0208144	-0.0330994
latent_factor_ss_perinatal	dmdtifp1_pc1	smri_vol_scs_putamen	nihtbx_cryst_uncorrected	C_2y~A_bl	-9.65935e-06	0.000330843	-0.0291962	0.976708	-9.65935e-06	-0.000477309
latent_factor_ss_perinatal	dmdtifp1_pc1	smri_vol_scs_putamen	nihtbx_cryst_uncorrected	C_2y~B_bl	-0.00179727	0.000526111	-3.41613	0.000635174	-0.00179727	-0.055848
latent_factor_ss_perinatal	dmdtifp1_pc1	smri_vol_scs_putamen	nihtbx_cryst_uncorrected	D_2y~A_bl	0.39101	0.123078	3.17692	0.00148848	0.39101	0.0519266
latent_factor_ss_perinatal	dmdtifp1_pc1	smri_vol_scs_putamen	nihtbx_cryst_uncorrected	D_2y~B_bl	-0.271744	0.196027	-1.38626	0.165667	-0.271744	-0.0226937
latent_factor_ss_perinatal	dmdtifp1_pc1	smri_vol_scs_putamen	nihtbx_cryst_uncorrected	D_2y~C_2y	5.27113	6.08797	0.865827	0.386585	5.27113	0.0141662
latent_factor_ss_perinatal	dmdtifp1_pc1	smri_vol_scs_putamen	nihtbx_cryst_uncorrected	B_bl~~B_bl	0.327921	0.00758922	43.2088	0	0.327921	0.998904
latent_factor_ss_perinatal	dmdtifp1_pc1	smri_vol_scs_putamen	nihtbx_cryst_uncorrected	C_2y~~C_2y	0.000338921	7.8438e-06	43.2088	0	0.000338921	0.996883
latent_factor_ss_perinatal	dmdtifp1_pc1	smri_vol_scs_putamen	nihtbx_cryst_uncorrected	D_2y~~D_2y	46.9049	1.08554	43.2088	0	46.9049	0.996472
latent_factor_ss_perinatal	dmdtifp1_pc1	smri_vol_scs_putamen	nihtbx_cryst_uncorrected	A_bl~~A_bl	0.830153	0	NA	NA	0.830153	1
latent_factor_ss_perinatal	dmdtifp1_pc1	smri_vol_scs_pallidum	nihtbx_cryst_uncorrected	B_bl~A_bl	-0.0208144	0.0102853	-2.0237	0.0430013	-0.0208144	-0.0330994
latent_factor_ss_perinatal	dmdtifp1_pc1	smri_vol_scs_pallidum	nihtbx_cryst_uncorrected	C_2y~A_bl	-0.000244961	0.000681103	-0.359653	0.719106	-0.000244961	-0.00581801
latent_factor_ss_perinatal	dmdtifp1_pc1	smri_vol_scs_pallidum	nihtbx_cryst_uncorrected	C_2y~B_bl	0.0103378	0.0010831	9.54465	0	0.0103378	0.154401
latent_factor_ss_perinatal	dmdtifp1_pc1	smri_vol_scs_pallidum	nihtbx_cryst_uncorrected	D_2y~A_bl	0.388998	0.122972	3.16331	0.00155988	0.388998	0.0516594
latent_factor_ss_perinatal	dmdtifp1_pc1	smri_vol_scs_pallidum	nihtbx_cryst_uncorrected	D_2y~B_bl	-0.198464	0.19792	-1.00275	0.315981	-0.198464	-0.016574
latent_factor_ss_perinatal	dmdtifp1_pc1	smri_vol_scs_pallidum	nihtbx_cryst_uncorrected	D_2y~C_2y	-8.00495	2.9546	-2.70932	0.00674215	-8.00495	-0.0447593
latent_factor_ss_perinatal	dmdtifp1_pc1	smri_vol_scs_pallidum	nihtbx_cryst_uncorrected	B_bl~~B_bl	0.327921	0.00758922	43.2088	0	0.327921	0.998904
latent_factor_ss_perinatal	dmdtifp1_pc1	smri_vol_scs_pallidum	nihtbx_cryst_uncorrected	C_2y~~C_2y	0.00143642	3.32437e-05	43.2088	0	0.00143642	0.976067
latent_factor_ss_perinatal	dmdtifp1_pc1	smri_vol_scs_pallidum	nihtbx_cryst_uncorrected	D_2y~~D_2y	46.8223	1.08363	43.2088	0	46.8223	0.994717
latent_factor_ss_perinatal	dmdtifp1_pc1	smri_vol_scs_pallidum	nihtbx_cryst_uncorrected	A_bl~~A_bl	0.830153	0	NA	NA	0.830153	1
latent_factor_ss_perinatal	dmdtifp1_pc1	smri_vol_scs_hpus	nihtbx_cryst_uncorrected	B_bl~A_bl	-0.0208144	0.0102853	-2.0237	0.0430013	-0.0208144	-0.0330994
latent_factor_ss_perinatal	dmdtifp1_pc1	smri_vol_scs_hpus	nihtbx_cryst_uncorrected	C_2y~A_bl	-0.000512882	0.000433052	-1.18434	0.236278	-0.000512882	-0.0193785
latent_factor_ss_perinatal	dmdtifp1_pc1	smri_vol_scs_hpus	nihtbx_cryst_uncorrected	C_2y~B_bl	-0.00138331	0.000688647	-2.00873	0.0445657	-0.00138331	-0.0328674
latent_factor_ss_perinatal	dmdtifp1_pc1	smri_vol_scs_hpus	nihtbx_cryst_uncorrected	D_2y~A_bl	0.393731	0.123091	3.19869	0.00138055	0.393731	0.052288
latent_factor_ss_perinatal	dmdtifp1_pc1	smri_vol_scs_hpus	nihtbx_cryst_uncorrected	D_2y~B_bl	-0.273741	0.195811	-1.39799	0.162117	-0.273741	-0.0228605
latent_factor_ss_perinatal	dmdtifp1_pc1	smri_vol_scs_hpus	nihtbx_cryst_uncorrected	D_2y~C_2y	5.40477	4.65071	1.16214	0.245179	5.40477	0.0189966
latent_factor_ss_perinatal	dmdtifp1_pc1	smri_vol_scs_hpus	nihtbx_cryst_uncorrected	B_bl~~B_bl	0.327921	0.00758922	43.2088	0	0.327921	0.998904
latent_factor_ss_perinatal	dmdtifp1_pc1	smri_vol_scs_hpus	nihtbx_cryst_uncorrected	C_2y~~C_2y	0.000580679	1.34389e-05	43.2088	0	0.000580679	0.998586
latent_factor_ss_perinatal	dmdtifp1_pc1	smri_vol_scs_hpus	nihtbx_cryst_uncorrected	D_2y~~D_2y	46.8974	1.08537	43.2088	0	46.8974	0.996312
latent_factor_ss_perinatal	dmdtifp1_pc1	smri_vol_scs_hpus	nihtbx_cryst_uncorrected	A_bl~~A_bl	0.830153	0	NA	NA	0.830153	1
latent_factor_ss_perinatal	dmdtifp1_pc1	smri_vol_scs_amygdala	nihtbx_cryst_uncorrected	B_bl~A_bl	-0.0208144	0.0102853	-2.0237	0.0430014	-0.0208144	-0.0330994
latent_factor_ss_perinatal	dmdtifp1_pc1	smri_vol_scs_amygdala	nihtbx_cryst_uncorrected	C_2y~A_bl	-0.00127738	0.000594738	-2.1478	0.0317295	-0.00127738	-0.0344638
latent_factor_ss_perinatal	dmdtifp1_pc1	smri_vol_scs_amygdala	nihtbx_cryst_uncorrected	C_2y~B_bl	0.0114899	0.000945762	12.1489	0	0.0114899	0.194942
latent_factor_ss_perinatal	dmdtifp1_pc1	smri_vol_scs_amygdala	nihtbx_cryst_uncorrected	D_2y~A_bl	0.387832	0.123158	3.14906	0.00163796	0.387832	0.0515046
latent_factor_ss_perinatal	dmdtifp1_pc1	smri_vol_scs_amygdala	nihtbx_cryst_uncorrected	D_2y~B_bl	-0.25309	0.199558	-1.26826	0.204706	-0.25309	-0.0211359
latent_factor_ss_perinatal	dmdtifp1_pc1	smri_vol_scs_amygdala	nihtbx_cryst_uncorrected	D_2y~C_2y	-2.44798	3.38674	-0.722815	0.469794	-2.44798	-0.0120495
latent_factor_ss_perinatal	dmdtifp1_pc1	smri_vol_scs_amygdala	nihtbx_cryst_uncorrected	B_bl~~B_bl	0.327921	0.00758922	43.2088	0	0.327921	0.998904
latent_factor_ss_perinatal	dmdtifp1_pc1	smri_vol_scs_amygdala	nihtbx_cryst_uncorrected	C_2y~~C_2y	0.00109524	2.53475e-05	43.2088	0	0.00109524	0.960365
latent_factor_ss_perinatal	dmdtifp1_pc1	smri_vol_scs_amygdala	nihtbx_cryst_uncorrected	D_2y~~D_2y	46.9078	1.08561	43.2088	0	46.9078	0.996533
latent_factor_ss_perinatal	dmdtifp1_pc1	smri_vol_scs_amygdala	nihtbx_cryst_uncorrected	A_bl~~A_bl	0.830153	0	NA	NA	0.830153	1
latent_factor_ss_perinatal	dmdtifp1_pc1	smri_vol_scs_vedc	nihtbx_cryst_uncorrected	B_bl~A_bl	-0.0208144	0.0102853	-2.0237	0.0430013	-0.0208144	-0.0330994
latent_factor_ss_perinatal	dmdtifp1_pc1	smri_vol_scs_vedc	nihtbx_cryst_uncorrected	C_2y~A_bl	0.00076121	0.00031883	2.38751	0.016963	0.00076121	0.0390574
latent_factor_ss_perinatal	dmdtifp1_pc1	smri_vol_scs_vedc	nihtbx_cryst_uncorrected	C_2y~B_bl	-0.000483209	0.000507009	-0.953057	0.340561	-0.000483209	-0.0155911
latent_factor_ss_perinatal	dmdtifp1_pc1	smri_vol_scs_vedc	nihtbx_cryst_uncorrected	D_2y~A_bl	0.386433	0.12317	3.1374	0.00170454	0.386433	0.0513188
latent_factor_ss_perinatal	dmdtifp1_pc1	smri_vol_scs_vedc	nihtbx_cryst_uncorrected	D_2y~B_bl	-0.278345	0.195741	-1.422	0.155025	-0.278345	-0.023245
latent_factor_ss_perinatal	dmdtifp1_pc1	smri_vol_scs_vedc	nihtbx_cryst_uncorrected	D_2y~C_2y	5.94546	6.31723	0.94115	0.346628	5.94546	0.0153883
latent_factor_ss_perinatal	dmdtifp1_pc1	smri_vol_scs_vedc	nihtbx_cryst_uncorrected	B_bl~~B_bl	0.327921	0.00758922	43.2088	0	0.327921	0.998904
latent_factor_ss_perinatal	dmdtifp1_pc1	smri_vol_scs_vedc	nihtbx_cryst_uncorrected	C_2y~~C_2y	0.000314757	7.28456e-06	43.2088	0	0.000314757	0.998191
latent_factor_ss_perinatal	dmdtifp1_pc1	smri_vol_scs_vedc	nihtbx_cryst_uncorrected	D_2y~~D_2y	46.9032	1.0855	43.2088	0	46.9032	0.996436
latent_factor_ss_perinatal	dmdtifp1_pc1	smri_vol_scs_vedc	nihtbx_cryst_uncorrected	A_bl~~A_bl	0.830153	0	NA	NA	0.830153	1

## Sheet: SM Table 9
x	y	estimate	df	tval	pval
group	smri_area_cdk_lobfr	113.274	6885.81	21.142	3.53811e-96
hemi	smri_area_cdk_lobfr	51.0838	6891.83	27.8575	6.23739e-162
group:hemi	smri_area_cdk_lobfr	1.53183	6891.83	0.590685	0.554751
group	smri_thick_cdk_fusiform	0.011895	6885.64	7.07855	1.60076e-12
hemi	smri_thick_cdk_fusiform	-0.0167894	6891.72	-20.7749	4.94157e-93
group:hemi	smri_thick_cdk_fusiform	-0.00316433	6891.72	-2.76867	0.00564356
group	smri_thick_cdk_ihcate	0.00106084	6884.97	0.517955	0.604506
hemi	smri_thick_cdk_ihcate	-0.00112368	6891.19	-0.938432	0.348055
group:hemi	smri_thick_cdk_ihcate	-0.00302954	6891.19	-1.78904	0.0736518
group	smri_thick_cdk_parahpal	0.0326261	6885.85	9.56724	1.49409e-21
hemi	smri_thick_cdk_parahpal	0.048354	6891.93	29.6335	9.44093e-182
group:hemi	smri_thick_cdk_parahpal	0.00698358	6891.93	3.02631	0.00248471
group	smri_thick_cdk_sufr	-0.00495679	6885.97	-2.63625	0.00840152
hemi	smri_thick_cdk_sufr	0.0219106	6891.98	33.8249	3.57361e-232
group:hemi	smri_thick_cdk_sufr	-0.00247769	6891.98	-2.70467	0.00685412
group	smri_vol_scs_tp	261.234	6885.9	22.2142	1.1988e-105
hemi	smri_vol_scs_tp	337.525	6891.9	105.064	0
group:hemi	smri_vol_scs_tp	25.0324	6891.9	5.50981	3.72212e-08
group	smri_vol_scs_pallidum	60.8014	6885.55	16.6297	6.47051e-61
hemi	smri_vol_scs_pallidum	63.2477	6891.61	37.8589	4.04199e-285
group:hemi	smri_vol_scs_pallidum	0.592716	6891.61	0.250874	0.801919

## Sheet: SM Table 10
ABCD var name	abbreviation	category	var info
smri_area_cdk_bankssts	BST	CSA	banks of superior temporal sulcus
smri_area_cdk_cdacate	CACg	CSA	caudalanteriorcingulate
smri_area_cdk_cdmdfr	CMF	CSA	caudalmiddlefrontal
smri_area_cdk_cuneus	Cu	CSA	cuneus
smri_area_cdk_ehinal	En	CSA	entorhinal
smri_area_cdk_fusiform	Fu	CSA	fusiform
smri_area_cdk_ifpl	IP	CSA	inferiorparietal
smri_area_cdk_iftm	IT	CSA	inferiortemporal
smri_area_cdk_ihcate	IstCg	CSA	isthmuscingulate
smri_area_cdk_locc	LO	CSA	lateraloccipital
smri_area_cdk_lobfr	LOrF	CSA	lateralorbitofrontal
smri_area_cdk_lingual	Lg	CSA	lingual
smri_area_cdk_mobfr	MOrF	CSA	medialorbitofrontal
smri_area_cdk_mdtm	MT	CSA	middletemporal
smri_area_cdk_parahpal	PaH	CSA	parahippocampal
smri_area_cdk_paracn	PaC	CSA	paracentral
smri_area_cdk_parsopc	Op	CSA	parsopercularis
smri_area_cdk_parsobis	Or	CSA	parsorbitalis
smri_area_cdk_parstgris	Tr	CSA	parstriangularis
smri_area_cdk_pericc	PerCa	CSA	pericalcarine
smri_area_cdk_postcn	PoC	CSA	postcentral
smri_area_cdk_ptcate	PoCg	CSA	posteriorcingulate
smri_area_cdk_precn	PreC	CSA	precentral
smri_area_cdk_pc	PreCu	CSA	precuneus
smri_area_cdk_rracate	RoACg	CSA	rostralanteriorcingulate
smri_area_cdk_rrmdfr	RoMF	CSA	rostralmiddlefrontal
smri_area_cdk_sufr	SF	CSA	superiorfrontal
smri_area_cdk_supl	SP	CSA	superiorparietal
smri_area_cdk_sutm	ST	CSA	superiortemporal
smri_area_cdk_sm	SM	CSA	supramarginal
smri_area_cdk_frpole	FPol	CSA	frontalpole
smri_area_cdk_tmpole	TPol	CSA	temporalpole
smri_area_cdk_trvtm	TrT	CSA	transversetemporal
smri_area_cdk_insula	Ins	CSA	insula
smri_thick_cdk_bankssts	BST	CT	banks of superior temporal sulcus
smri_thick_cdk_cdacate	CACg	CT	caudalanteriorcingulate
smri_thick_cdk_cdmdfr	CMF	CT	caudalmiddlefrontal
smri_thick_cdk_cuneus	Cu	CT	cuneus
smri_thick_cdk_ehinal	En	CT	entorhinal
smri_thick_cdk_fusiform	Fu	CT	fusiform
smri_thick_cdk_ifpl	IP	CT	inferiorparietal
smri_thick_cdk_iftm	IT	CT	inferiortemporal
smri_thick_cdk_ihcate	IstCg	CT	isthmuscingulate
smri_thick_cdk_locc	LO	CT	lateraloccipital
smri_thick_cdk_lobfr	LOrF	CT	lateralorbitofrontal
smri_thick_cdk_lingual	Lg	CT	lingual
smri_thick_cdk_mobfr	MOrF	CT	medialorbitofrontal
smri_thick_cdk_mdtm	MT	CT	middletemporal
smri_thick_cdk_parahpal	PaH	CT	parahippocampal
smri_thick_cdk_paracn	PaC	CT	paracentral
smri_thick_cdk_parsopc	Op	CT	parsopercularis
smri_thick_cdk_parsobis	Or	CT	parsorbitalis
smri_thick_cdk_parstgris	Tr	CT	parstriangularis
smri_thick_cdk_pericc	PerCa	CT	pericalcarine
smri_thick_cdk_postcn	PoC	CT	postcentral
smri_thick_cdk_ptcate	PoCg	CT	posteriorcingulate
smri_thick_cdk_precn	PreC	CT	precentral
smri_thick_cdk_pc	PreCu	CT	precuneus
smri_thick_cdk_rracate	RoACg	CT	rostralanteriorcingulate
smri_thick_cdk_rrmdfr	RoMF	CT	rostralmiddlefrontal
smri_thick_cdk_sufr	SF	CT	superiorfrontal
smri_thick_cdk_supl	SP	CT	superiorparietal
smri_thick_cdk_sutm	ST	CT	superiortemporal
smri_thick_cdk_sm	SM	CT	supramarginal
smri_thick_cdk_frpole	FPol	CT	frontalpole
smri_thick_cdk_tmpole	TPol	CT	temporalpole
smri_thick_cdk_trvtm	TrT	CT	transversetemporal
smri_thick_cdk_insula	Ins	CT	insula
smri_vol_scs_cbwmatter	Cbwmatter	Vol	cerebral-white-matter
smri_vol_scs_ltventricle	Ltventricle	Vol	lateral-ventricle
smri_vol_scs_inflatvent	Inflatvent	Vol	inf-lat-vent
smri_vol_scs_crbwmatter	Crbwmatter	Vol	cerebellum-white-matter
smri_vol_scs_crbcortex	Crbcortex	Vol	cerebellum-cortex
smri_vol_scs_tp	Tp	Vol	thalamus-proper
smri_vol_scs_caudate	Caudate	Vol	caudate
smri_vol_scs_putamen	Putamen	Vol	putamen
smri_vol_scs_pallidum	Pallidum	Vol	pallidum
smri_vol_scs_hpus	Hpus	Vol	hippocampus
smri_vol_scs_amygdala	Amygdala	Vol	amygdala
smri_vol_scs_vedc	Vedc	Vol	ventraldc
dmdtifp1_19	FA	DTI	Average fractional anisotropy within DTI atlas tract corpus callosum
dmdtifp1_61	MD	DTI	Mean diffusivity within DTI atlas tract corpus callosum
dmdtifp1_103	LD	DTI	Average longitudinal diffusion coefficient within DTI atlas tract corpus callosum
dmdtifp1_145	TD	DTI	Average transverse diffusion coefficient within DTI atlas tract corpus callosum
latent_factor_ss_general_ses	SES	LF	General latent factor of economic, social, and physiological well-being.
latent_factor_ss_social	Social	LF	Latent factor for youth perceived social support.
latent_factor_ss_perinatal	Perinatal	LF	Latent factor for perinatal health
[truncated: 18 more rows]
